# Supplementary material for: Enantioselective synthesis of highly functionalized octahydro-6-oxo-1-phenylnaphthalene-2-carbaldehydes via organocatalytic domino reactions
Source: Royal Society of Chemistry journal article supplement (doi:10.1039/b906205j), 2009-01-01
Supplement: b906205j.pdf [file b906205j.pdf]

# Enantioselective Synthesis of Highly Functionalized Octahydro-6-oxo-1-phenylnaphthalene-2-carbaldehydes via Organocatalytic Domino Reactions.

Bor-Cherng Hong,\* Roshan Y. Nimje, and Ju-Hsiou Liao

*Department of Chemistry and Biochemistry, National Chung Cheng University, Chia-Yi, 621, Taiwan, R.O.C.*

*chebch@ccu.edu.tw*

## SUPPORTING INFORMATION:

Contents: (1) ORTEP plots for X-ray crystal structures of **5a** and **5j**.

(2) Spectra copies for compounds **3a-8**.

(3) *Ee* analysis by HPLC with chiral column, in Table 1-2.

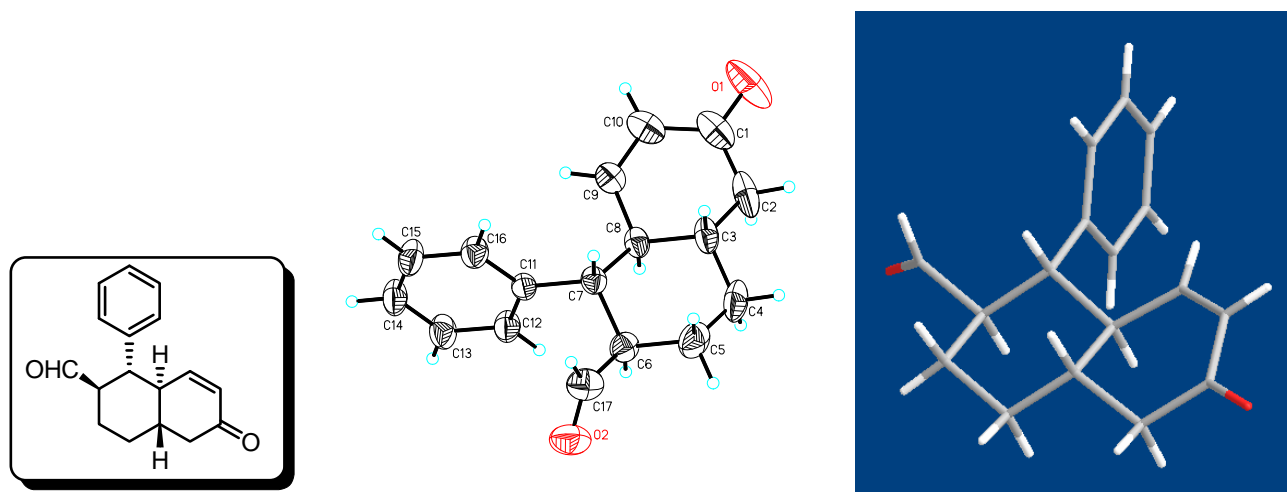

**Figure S1.** ORTEP plots for X-ray crystal structures of **5a**.

CCDC 716016 contains the supplementary crystallographic data for **5a**. These data can be obtained free of charge from the Cambridge Crystallographic Data Centre via [www.ccdc.cam.ac.uk/data\\_request/cif](http://www.ccdc.cam.ac.uk/data_request/cif). Crystallographic data for **5a**:  $C_{17}H_{18}O_2$ ,  $M = 254.31$ , monoclinic, space group P 21,  $T = 294(2)K$ ,  $a = 6.1387(7)$ ,  $b = 11.0076(13)$ ,  $c = 10.7760(13)$  Å,  $\beta = 103.653(2)^\circ$ ,  $V = 707.58(14)$  Å<sup>3</sup>,  $Z = 2$ ,  $D = 1.194$  g/cm<sup>3</sup>,  $\lambda$  (Mo- $K\alpha$ ) = 0.71073 Å, 7023 reflections collected, 2596 unique reflections, 173 parameters refined on  $F^2$ ,  $R = 0.0435$ ,  $wR2[F^2] = 0.1224$  [2392 data with  $F^2 > 2\sigma(F^2)$ ].

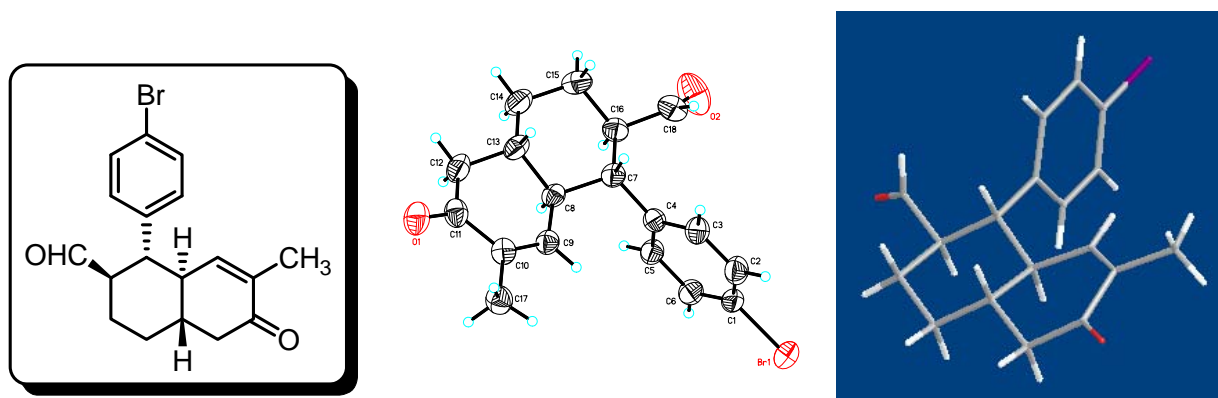

**Figure S2.** ORTEP plots for X-ray crystal structures of **5j**.

CCDC 716017 contains the supplementary crystallographic data for **5j**. These data can be obtained free of charge from the Cambridge Crystallographic Data Centre via [www.ccdc.cam.ac.uk/data\\_request/cif](http://www.ccdc.cam.ac.uk/data_request/cif). Crystallographic data for **5j**:  $C_{18}H_{19}BrO_2$ ,  $M = 347.24$ , monoclinic, space group P 21,  $T = 292(2)K$ ,  $a = 7.063(3)$ ,  $b = 10.733(5)$ ,  $c = 10.436(5)$  Å,  $\beta = 91.248(8)^\circ$ ,  $V = 791.0(6)$  Å<sup>3</sup>,  $Z = 2$ ,  $D = 1.458$  g/cm<sup>3</sup>,  $\lambda$  (Mo- $K\alpha$ ) = 0.71073 Å, 6951 reflections collected, 3652 unique reflections, 191 parameters refined on  $F^2$ ,  $R = 0.0415$ ,  $wR2[F^2] = 0.0976$  [2717 data with  $F^2 > 2\sigma(F^2)$ ].

Fig S3. <sup>1</sup>H NMR of 3a (500 MHz, CDCl<sub>3</sub>).

RYN-2-110-F1

exp8 s2pul

```

SAMPLE
date Sep 25 2008 dfrq 125.695
solvent cdc13 dn C13
file exp dpwr 30
ACQUISITION
sfrq 499.836 dm nnh
tn H1 dmm c
at 3.000 dmf 200
np 48000 dseq
sw 8000.0 dres 1.0
fb 4000 homo n
bs 4
PROCESSING
tpwr 56 wtfile
pw 4.8 proc ft
d1 1.000 fn not used
tof 499.7 math f
nt 4
ct 4 werr react
alock y wexp procplot
gain not used wbs
FLAGS wnt
il n
in n
dp y
hs nn
DISPLAY
sp -250.1
wp 5498.0
vs 113
sc 0
wc 210
hzmm 26.18
is 112.01
rfl 4627.4
rfp 3618.8
th 5
ins 100.000
nm ph
    
```

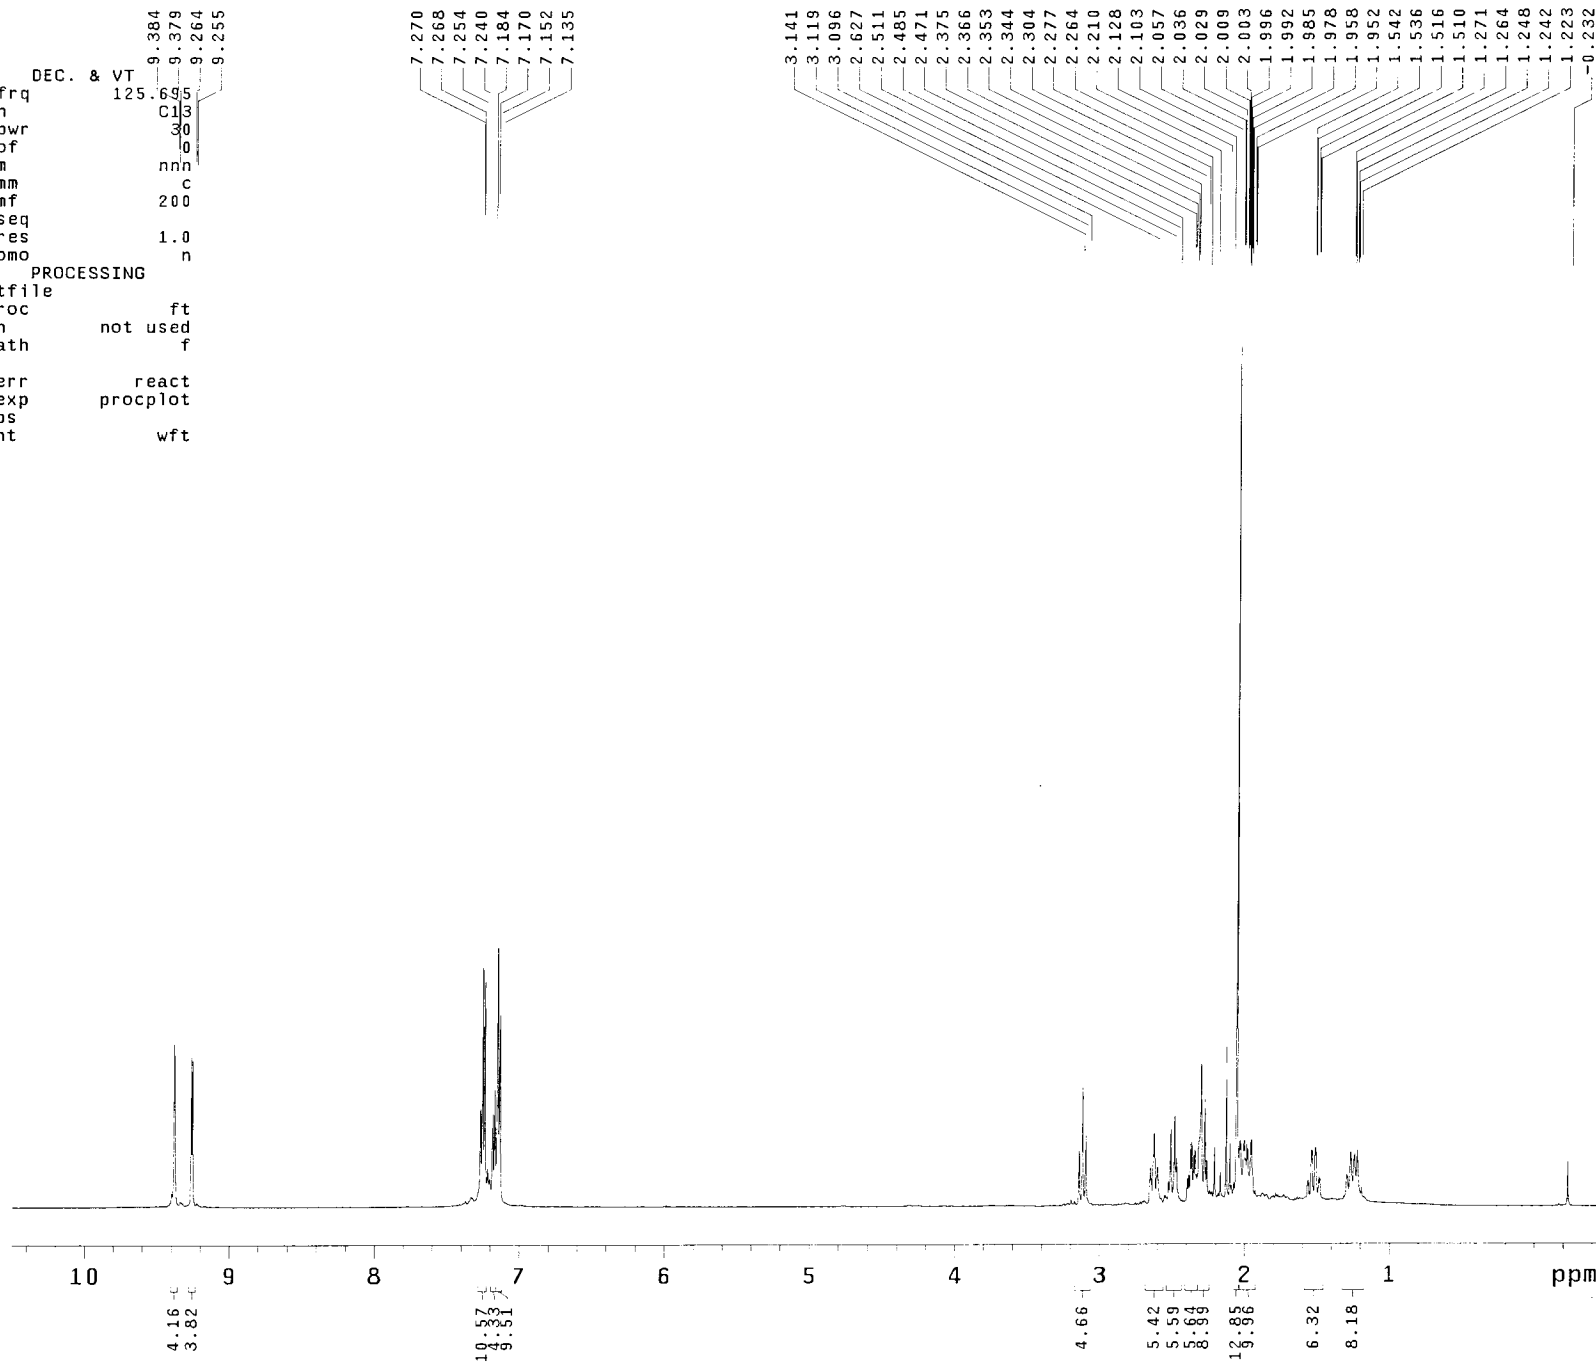

RYN-2-110-F1  
exp7 s2pu1

SAMPLE  
date Sep 24 2008  
solvent cdc13  
file exp

ACQUISITION  
sfrq 125.698  
tn C13  
at 1.000  
np 62894  
sw 31446.5  
fb 17000  
bs 16  
ss 2  
tpwr 54  
pw 4.0  
d1 1.000  
tof 2512.2  
nt 10000  
ct 10000  
alock y  
gain not used

DEC. & VT  
499.836  
11905

PROCESSING  
lb 1.00  
wtfile  
proc ft  
fn not used  
math f  
werr react  
wexp procpot  
wbs testsn  
wnt

FLAGS  
il n  
in n  
dp y  
hs nn

DISPLAY  
sp -1256.9  
wp 28906.3  
vs 50  
sc 0  
wc 210  
hzmm 137.65  
is 500.00  
rfl 10981.5  
rfp 9677.6  
th 3  
ins 100.000  
nm ph

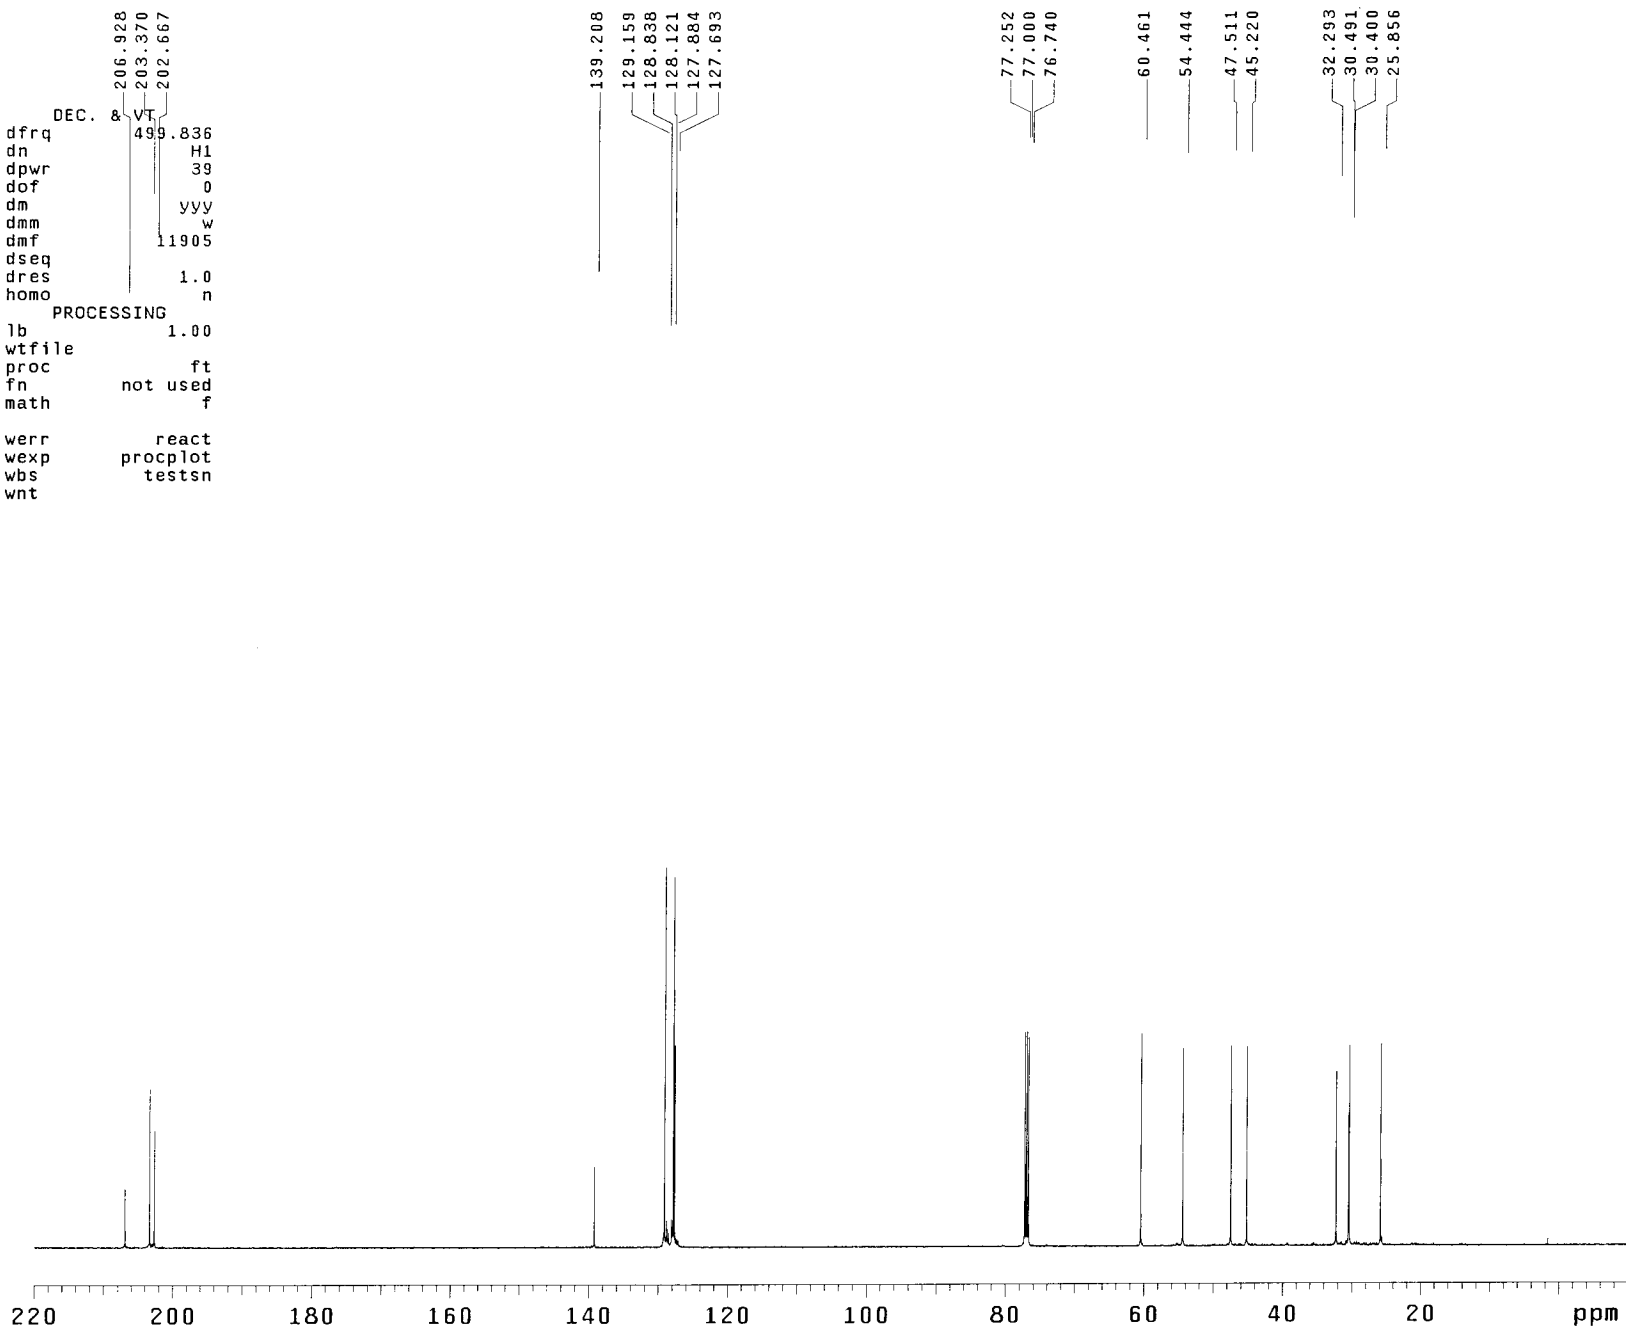

Fig S4. <sup>13</sup>C NMR of 3a (500 MHz, CDCl<sub>3</sub>).

Fig S5. DEPT of 3a (CDCl<sub>3</sub>).

TYN-2-110-F1

exp9 DEPT

|             |             |            |             |        |
|-------------|-------------|------------|-------------|--------|
| SAMPLE      |             | DEPT       | ACQUISITION | ARRAYS |
| date        | Sep 25 2008 | j1xh 140.0 | array       | mult   |
| solvent     | cdc13       | mult       | arrayed     | mult   |
| sample      | undefined   | SPECIAL    | arraydim    | 3      |
| ACQUISITION |             | temp       | not used    | i      |
| sw          | 31446.5     | gain       | 14          | 1      |
| at          | 1.000       | spin       | 0           | 2      |
| np          | 62894       | PROCESSING | 3           | 1.5    |
| bs          | 16          | lb         | 1.00        |        |
| ss          | -4          | fn         | not used    |        |
| d1          | 1.000       | SPECTRUM   |             |        |
| nt          | 3000        | wp         | 28906.3     |        |
| ct          | 3000        | sp         | -1257.2     |        |
| TRANSMITTER |             | rp         | -122.7      |        |
| tn          | C13         | lp         | -28.2       |        |
| tof         | 2512.2      | ai         | cdc ph      |        |
| tpwr        | 54          | REFERENCE  |             |        |
| pw          | 9.400       | rfl        | 1269.7      |        |
| DECOUPLER   |             | rfp        | 0           |        |
| dn          | H1          | PLOT       |             |        |
| dof         | 0           | wc         | 210         |        |
| dpwr        | 39          | sc         | 0           |        |
| dm          | nny         | vs         | 10592       |        |
| dmm         | ccw         | hzmm       | 137.65      |        |
| dmf         | 11905       | th         | 68          |        |
| pp1v1       | 49          |            |             |        |
| pp          | 29.400      |            |             |        |

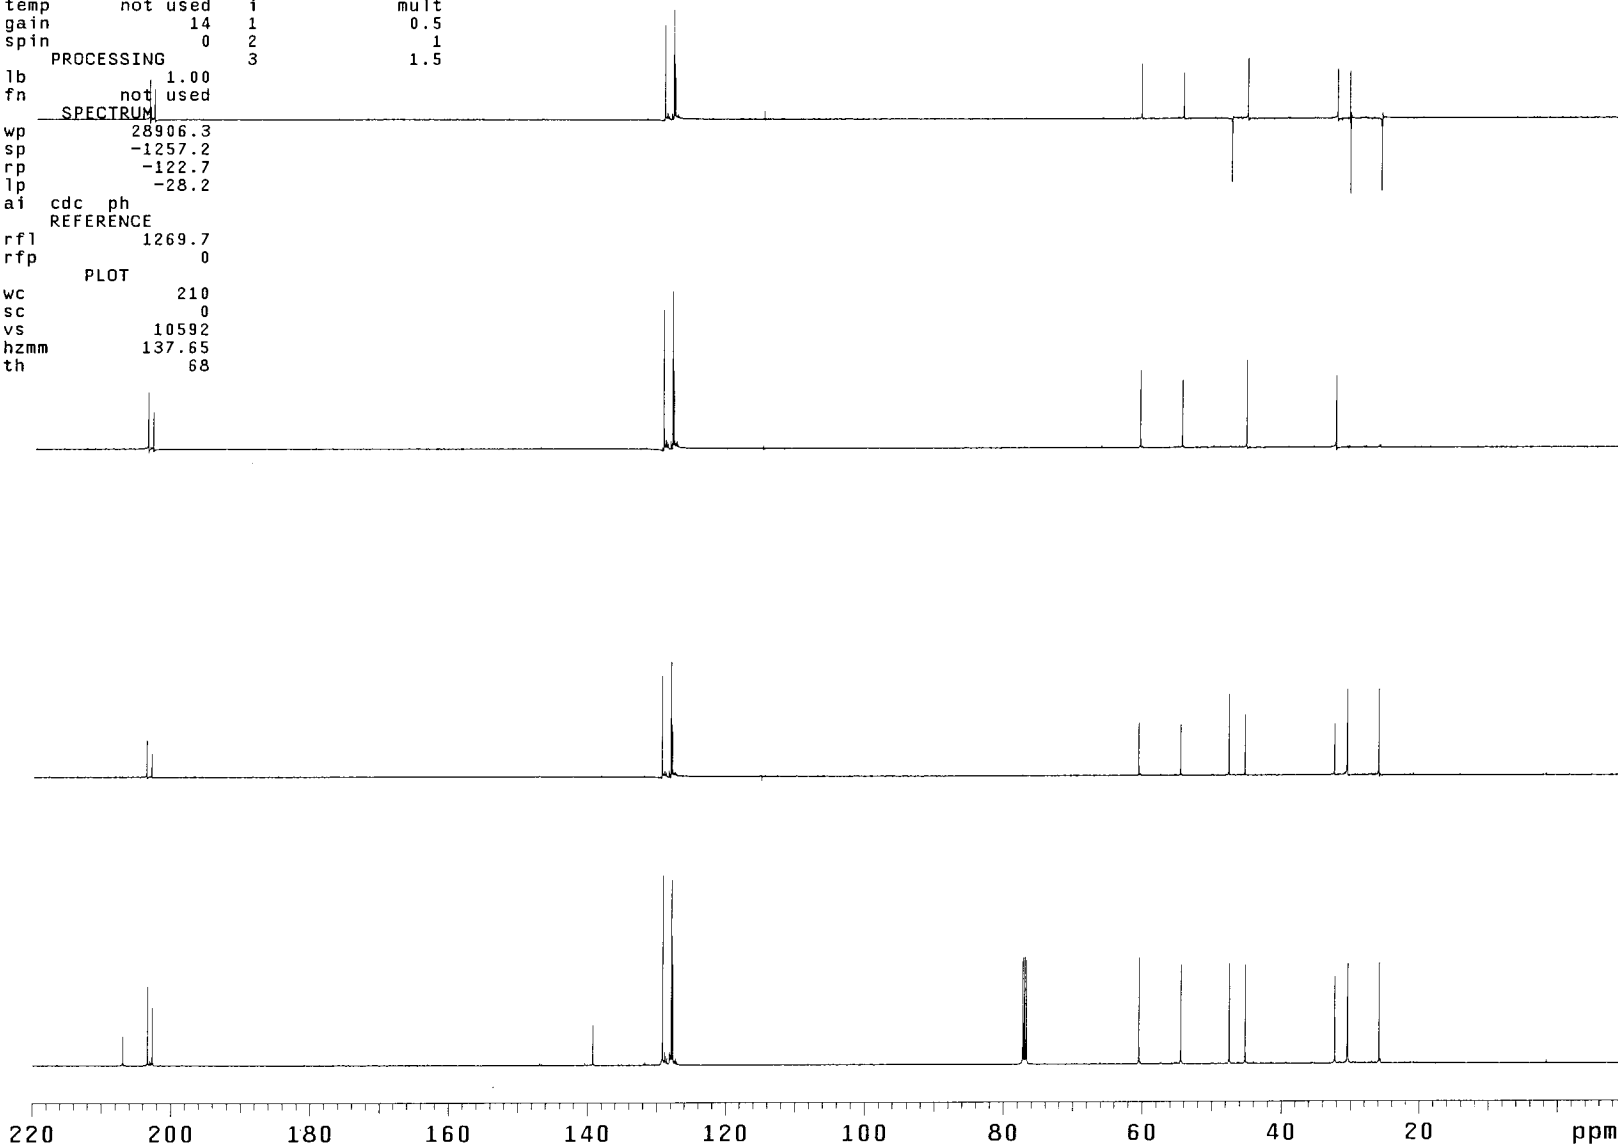

RYN-2-110-F1

exp3 gCOSY

| SAMPLE         |             | FLAGS         |          |
|----------------|-------------|---------------|----------|
| date           | Sep 24 2008 | hs            | nn       |
| solvent        | cdcl3       | sspul         | n        |
| sample         | undefined   | hsglv1        | 1026     |
| ACQUISITION    |             | SPECIAL       |          |
| sw             | 4498.4      | temp          | not used |
| at             | 0.228       | gain          | 28       |
| np             | 2048        | spin          | 0        |
| fb             | 3000        | F2 PROCESSING |          |
| ss             | 16          | sb            | -0.114   |
| d1             | 1.000       | sbs           | not used |
| nt             | 32          | fn            | 2048     |
| 2D ACQUISITION |             | F1 PROCESSING |          |
| sw1            | 4498.4      | sb1           | -0.028   |
| ni             | 128         | sbs1          | not used |
| TRANSMITTER    |             | proc1         |          |
| tn             | H1          | fn1           | 2048     |
| sfrq           | 499.836     | DISPLAY       |          |
| tof            | 249.8       | sp            | 504.2    |
| tpwr           | 56          | wp            | 4494.0   |
| pw             | 12.000      | sp1           | 504.2    |
| GRADIENTS      |             | wp1           | 4494.0   |
| gzlv11         | 1026        | rfl           | -499.8   |
| gt1            | 0.001000    | rfp           | 0        |
| gstab          | 0.000500    | rfl1          | -499.8   |
| DECOUPLER      |             | rfp1          | 0        |
| dn             | C13         | PLOT          |          |
| dm             | nnn         | wc            | 155.0    |
|                |             | sc            | 10.0     |
|                |             | wc2           | 155.0    |
|                |             | sc2           | 0        |
|                |             | vs            | 57       |
|                |             | th            | 5        |
|                |             | ai            | cdc av   |

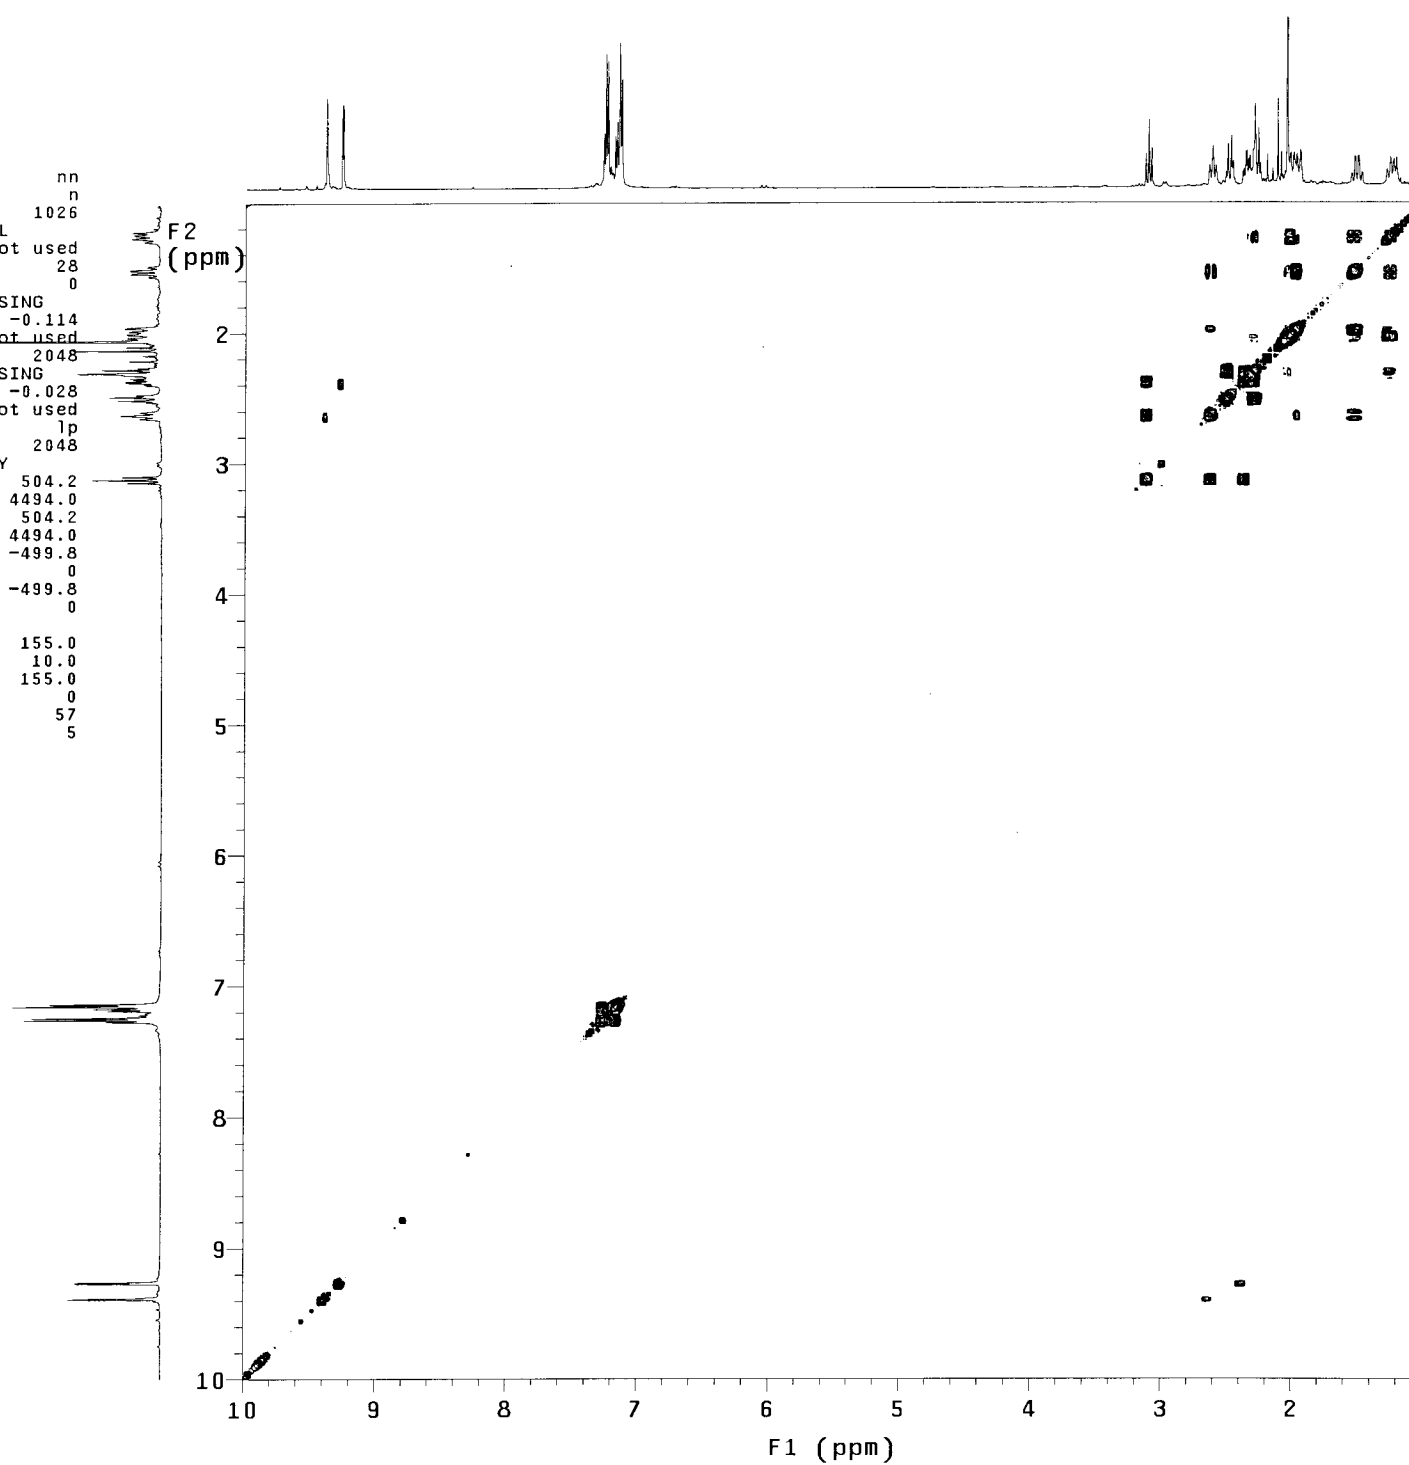Fig S6. COSY of 3a (CDCl<sub>3</sub>).

exp4 gHMQC

Fig S7. HMQC of 3a (CDCl<sub>3</sub>).

| SAMPLE         |             | FLAGS         | ACQUISITION | ARRAYS   |
|----------------|-------------|---------------|-------------|----------|
| date           | Sep 24 2008 | hs            | n           | array    |
| solvent        | cdc13       | sspul         | y           | arraydim |
| sample         | undefined   | PFGflg        | y           | phase    |
| ACQUISITION    | 4498.4      | hsglvi        | 1026        | 1        |
| sw             | 4498.4      | SPECIAL       | 1           | 2        |
| at             | 0.228       | temp          | not used    | 2        |
| np             | 2048        | gain          | 28          |          |
| fb             | 3000        | spin          | 0           |          |
| ss             | 32          | GRADIENTS     |             |          |
| d1             | 1.000       | gzlv11        | 1026        |          |
| nt             | 16          | gt1           | 0.001000    |          |
| 2D ACQUISITION |             | gzlv13        | 516         |          |
| sw1            | 21367.5     | gt3           | 0.001000    |          |
| ni             | 128         | gstab         | 0.000500    |          |
| phase          | arrayed     | F2 PROCESSING |             |          |
| TRANSMITTER    |             | gf            | 0.105       |          |
| tn             | H1          | gfs           | not used    |          |
| sfrq           | 499.836     | fn            | 2048        |          |
| tof            | 249.8       | F1 PROCESSING |             |          |
| tpwr           | 56          | gf1           | 0.006       |          |
| pw             | 12.000      | gfs1          | not used    |          |
| DECOUPLER      |             | proci         | lp          |          |
| dn             | C13         | fn1           | 2048        |          |
| dof            | -2515.1     | DISPLAY       |             |          |
| dm             | nny         | sp            | 521.8       |          |
| dmm            | ccp         | wp            | 3510.0      |          |
| dmf            | 32258       | sp1           | 1768.1      |          |
| dpwr           | 35          | wp1           | 15337.0     |          |
| pwxlv1         | 51          | rfl           | -499.8      |          |
| pwx            | 14.700      | rfp           | 0           |          |
| HMQC           |             | rfl1          | 1257.5      |          |
| j1xh           | 140.0       | rfp1          | 0           |          |
| nullflg        | y           | PLOT          |             |          |
|                |             | wc            | 150.0       |          |
|                |             | sc            | 6.2         |          |
|                |             | wc2           | 116.2       |          |
|                |             | sc2           | 0           |          |
|                |             | vs            | 1814        |          |
|                |             | th            | 3           |          |
|                |             | ai            | cdc         | ph       |

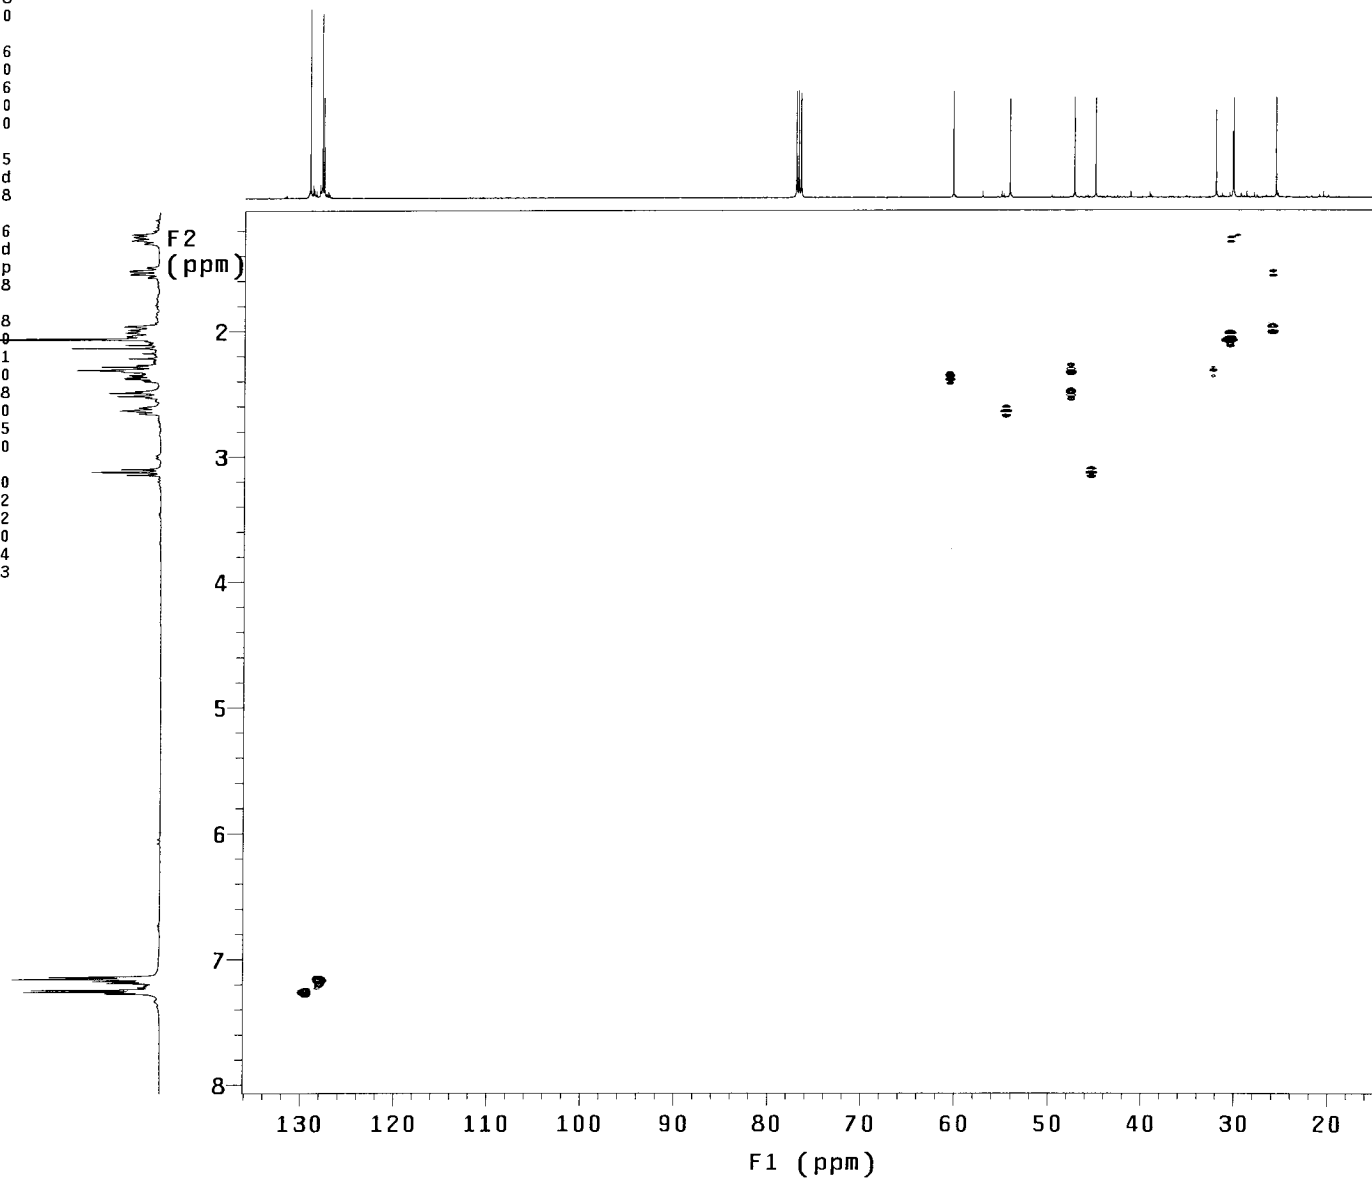

RYN-2-110-F1

exp6 NOESY

| SAMPLE         |             | FLAGS         | n        |
|----------------|-------------|---------------|----------|
| date           | Sep 24 2008 | hs            | y        |
| solvent        | cdcl3       | sspu1         | y        |
| sample         | undefined   | PFGflg        | y        |
| ACQUISITION    |             | hsglv1        | 1026     |
| sw             | 4498.4      | SPECIAL       |          |
| at             | 0.228       | temp          | not used |
| np             | 2048        | gain          | 20       |
| fb             | 3000        | spin          | 0        |
| ss             | 32          | F2 PROCESSING |          |
| d1             | 1.000       | gf            | 0.105    |
| nt             | 8           | gfs           | not used |
| 2D ACQUISITION |             | fn            | 2048     |
| sw1            | 4498.4      | F1 PROCESSING |          |
| ni             | 200         | gf1           | 0.041    |
| TRANSMITTER    |             | gfs1          | not used |
| tn             | H1          | procl         | lp       |
| sfrq           | 499.836     | fn1           | 2048     |
| tof            | 249.8       | DISPLAY       |          |
| tpwr           | 56          | sp            | 504.2    |
| pw             | 12.000      | wp            | 4494.0   |
| NOESY          |             | sp1           | 504.2    |
| mix            | 0.400       | wp1           | 4494.0   |
| PRESATURATION  |             | rfl           | -499.8   |
| satmode        | nnnn        | rfp           | 0        |
| satpwr         | 0           | rfl1          | -499.8   |
| satdly         | 0           | rfp1          | 0        |
| satfrq         | 0           | PLOT          |          |
| DECOUPLER      |             | wc            | 155.0    |
| dn             | C13         | sc            | 10.0     |
| dm             | nnn         | wc2           | 155.0    |
|                |             | sc2           | 0        |
|                |             | vs            | 1814     |
|                |             | th            | 1        |
|                |             | ai            | ph       |

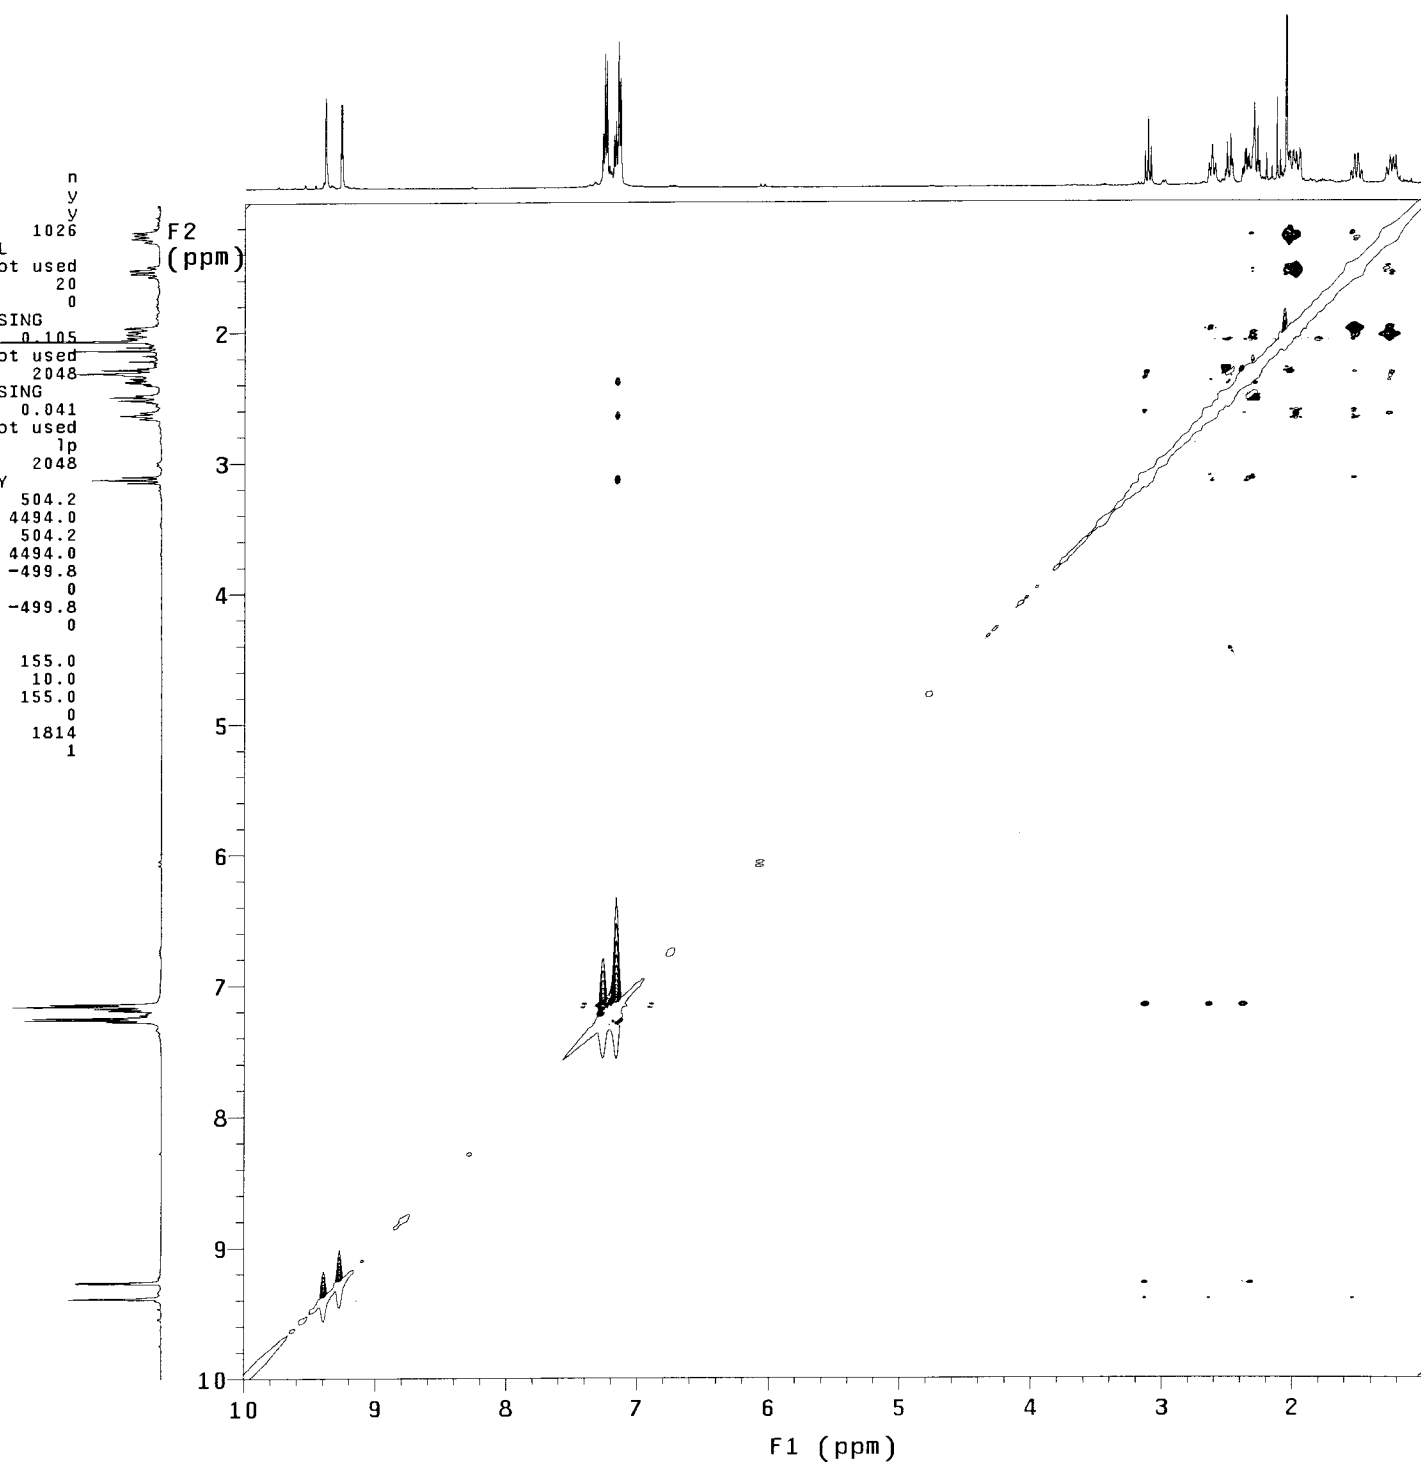Fig S8. NOESY of 3a (CDCl<sub>3</sub>).



Fig S9. 1H NMR of 4a (500 MHz, CDCl3).

RYN-2-113-0-F2

exp21 s2pu1

```

SAMPLE
date Jan 15 2009 dfrq 125.695
solvent cdcl3 dn C13
file exp dpwr 30
ACQUISITION
sfrq 499.836 dm nnh
tn H1 dmm cc
at 3.000 dmf 200
np 48000 dseq
sw 8000.0 dres 1.0
fb 4000 homo
bs 4
tpwr 57 wtfile
pw 4.8 proc ft
dl 1.000 fn not used
tof 499.7 math f
nt 4
ct 4 werr react
alock y wexp procplot
gain not used wbs
FLAGS not used wnt wft

PROCESSING
il n
in n
dp y
hs nn

DISPLAY
sp -250.1
wp 5498.0
vs 39
sc 0
wc 210
hzmm 26.18
is 135.97
rfl 4631.1
rfp 3618.8
th 5
ins 100.000
nm ph
    
```

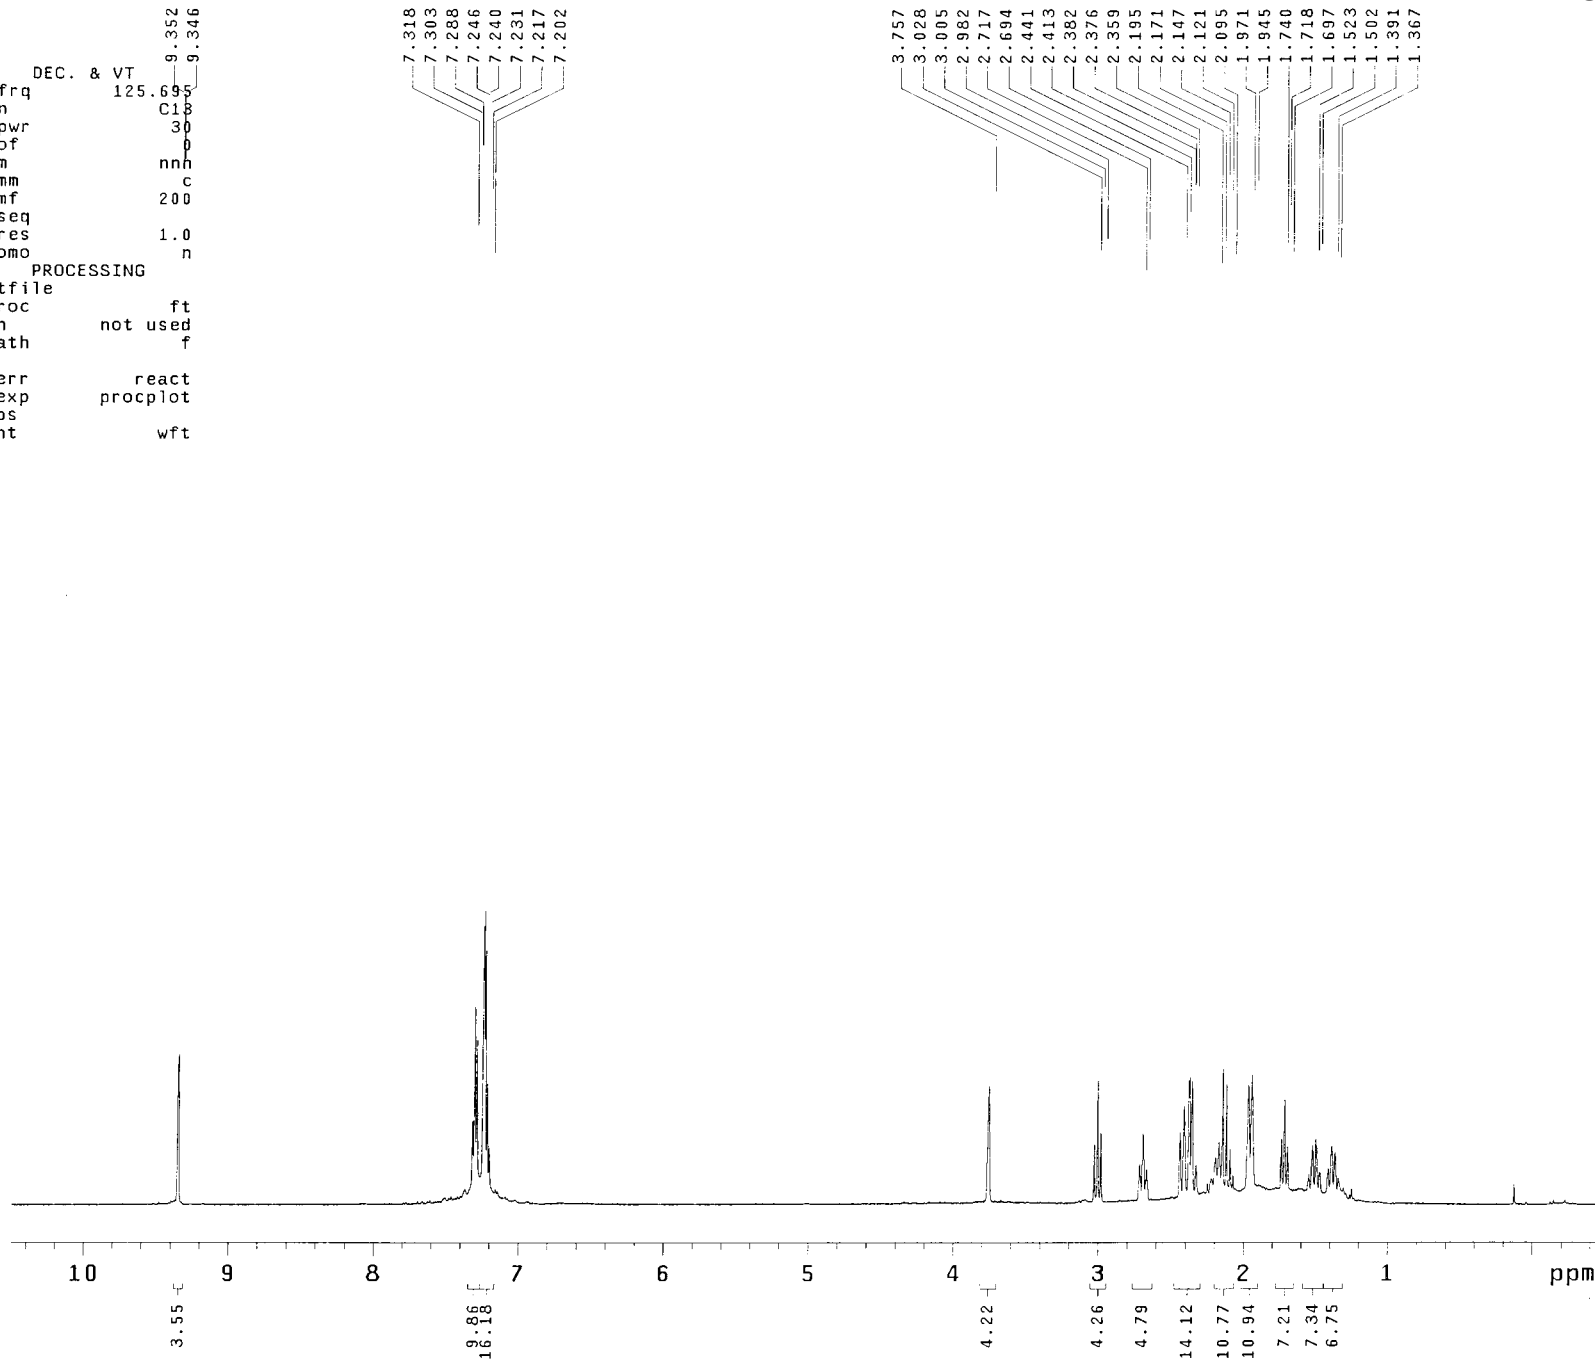

RYN-2-113-D-F2

exp23 s2pul

```
SAMPLE
date Jan 15 2009 dfrq 499.836
solvent cdc13 dn H1
file exp dpwr 39
ACQUISITION dof 0
sfrq 125.698 dm yyv
tn C13 dmm w
at 1.000 dmf 11905
np 62894 dseq
sw 31446.5 dres 1.0
fb 17000 homo n
bs 16
ss 2 lb 1.00
tpwr 54 wtfile
pw 4.0 proc ft
d1 1.000 fn not used
tof 2512.2 math f
nt 10000
ct 1088 werr react
alock y wexp procplot
gain not used wbs testsn
        wnt

PROCESSING
il n
in n
dp y
hs nn

DISPLAY
sp -1256.9
wp 28906.3
vs 75
sc 0
wc 210
hzmm 137.65
is 500.00
rfl 10980.6
rfp 9677.6
th 6
ins 100.000
nm ph
```

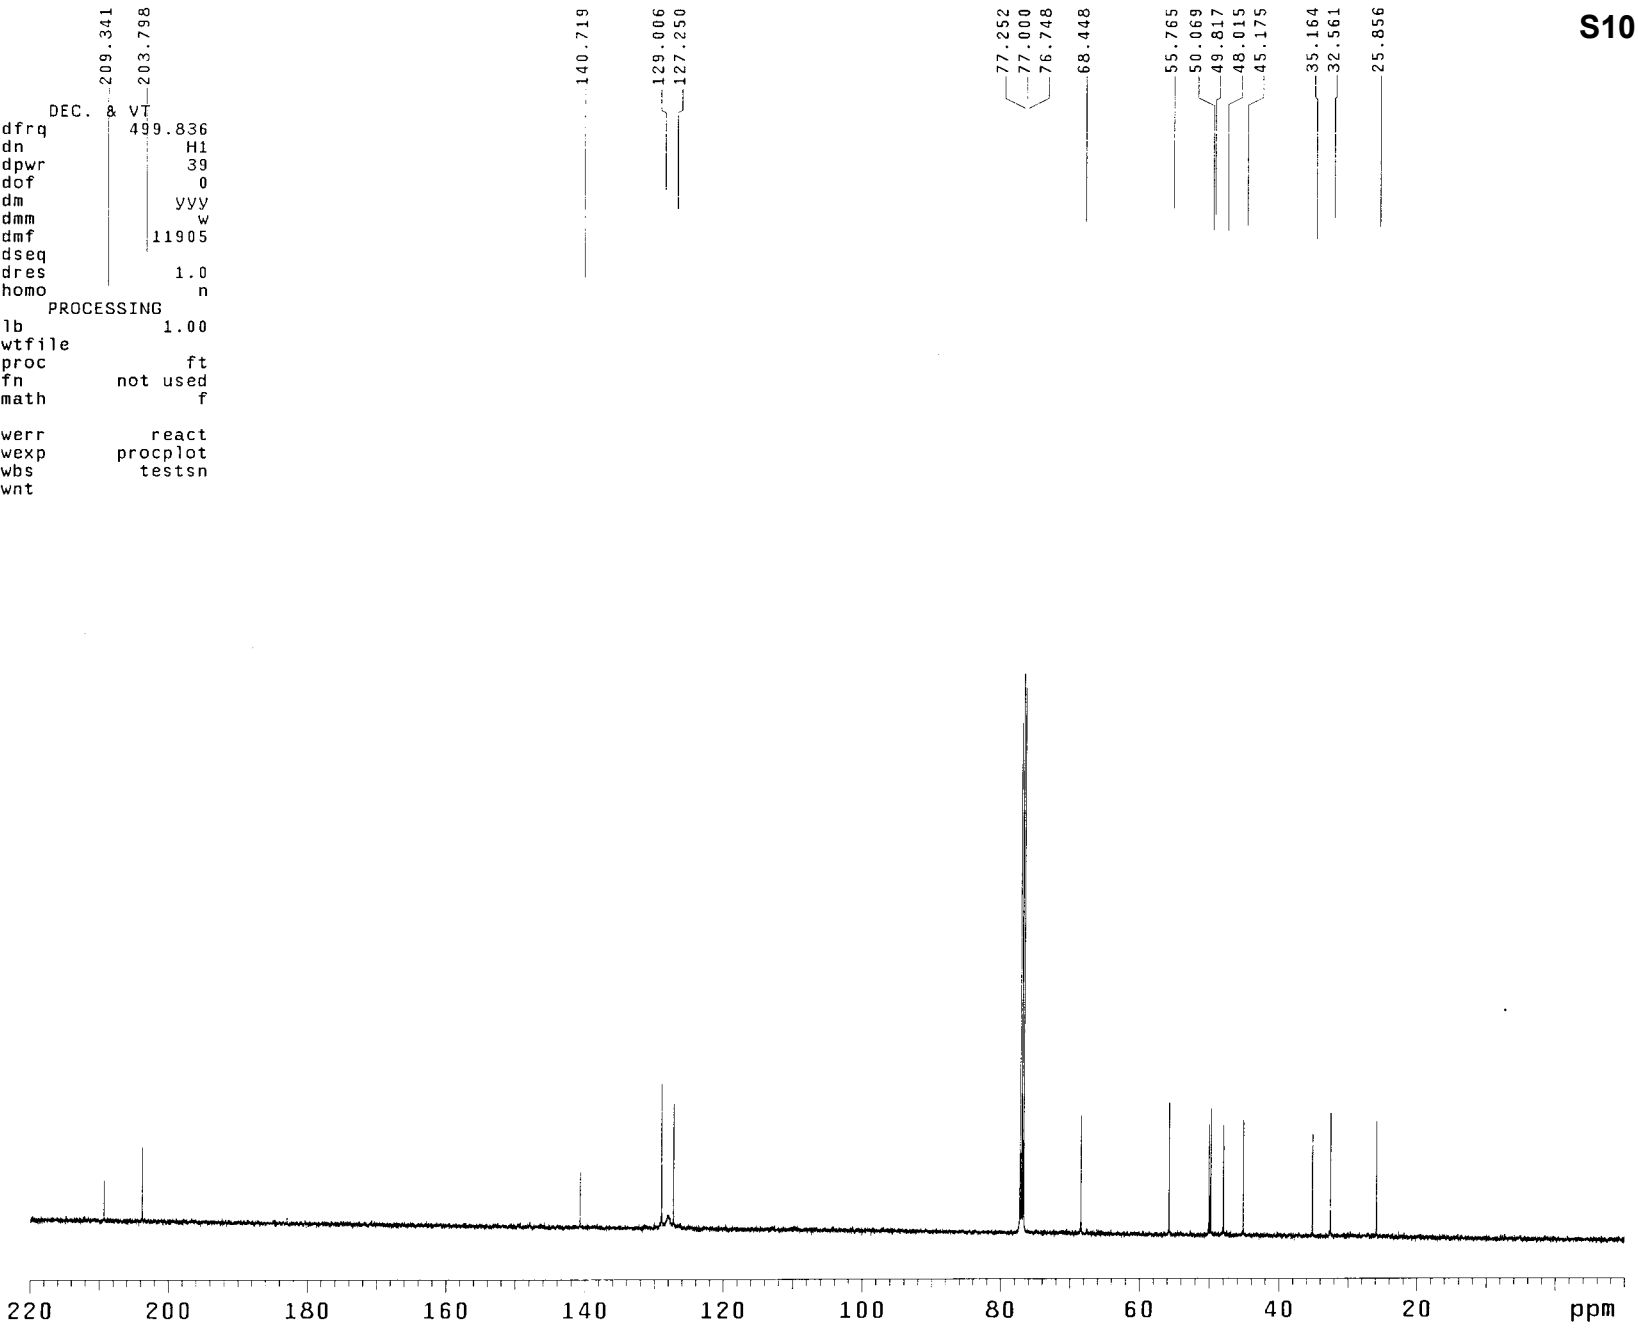

Fig S10. 13 NMR of 4a (125 MHz, CDCl3).

exp22 DEPT

|             |             |            |                    |          |      |
|-------------|-------------|------------|--------------------|----------|------|
| SAMPLE      |             | DEPT       | ACQUISITION ARRAYS |          |      |
| date        | Jan 15 2009 | jlxh       | 140.0              | array    | mult |
| solvent     | cdc13       | mult       | arrayed            | arraydim | 3    |
| sample      | undefined   | SPECIAL    |                    |          |      |
| ACQUISITION |             | temp       | not used           | i        | mult |
| sw          | 31446.5     | gain       | 34                 | 1        | 0.5  |
| at          | 1.000       | spin       | 0                  | 2        | 1    |
| np          | 62894       | PROCESSING |                    | 3        | 1.5  |
| bs          | 16          | lb         | 1.00               |          |      |
| ss          | -4          | fn         | not used           |          |      |
| d1          | 1.000       | SPECTRUM   |                    |          |      |
| nt          | 1000        | wp         | 28906.3            |          |      |
| ct          | 1000        | sp         | -1257.2            |          |      |
| TRANSMITTER |             | rp         | 49.4               |          |      |
| tn          | C13         | lp         | 3.9                |          |      |
| tof         | 2512.2      | ai         | cdc ph             |          |      |
| tpwr        | 54          | REFERENCE  |                    |          |      |
| pw          | 9.400       | rfl        | 1269.7             |          |      |
| DECOUPLER   |             | rff        | 0                  |          |      |
| dn          | H1          | PLOT       |                    |          |      |
| dof         | 0           | wc         | 210                |          |      |
| dpwr        | 39          | sc         | 0                  |          |      |
| dm          | nny         | vs         | 438                |          |      |
| dmm         | ccw         | hzmm       | 137.65             |          |      |
| dmf         | 11905       | th         | 68                 |          |      |
| pp1v1       | 49          |            |                    |          |      |
| pp          | 29.400      |            |                    |          |      |

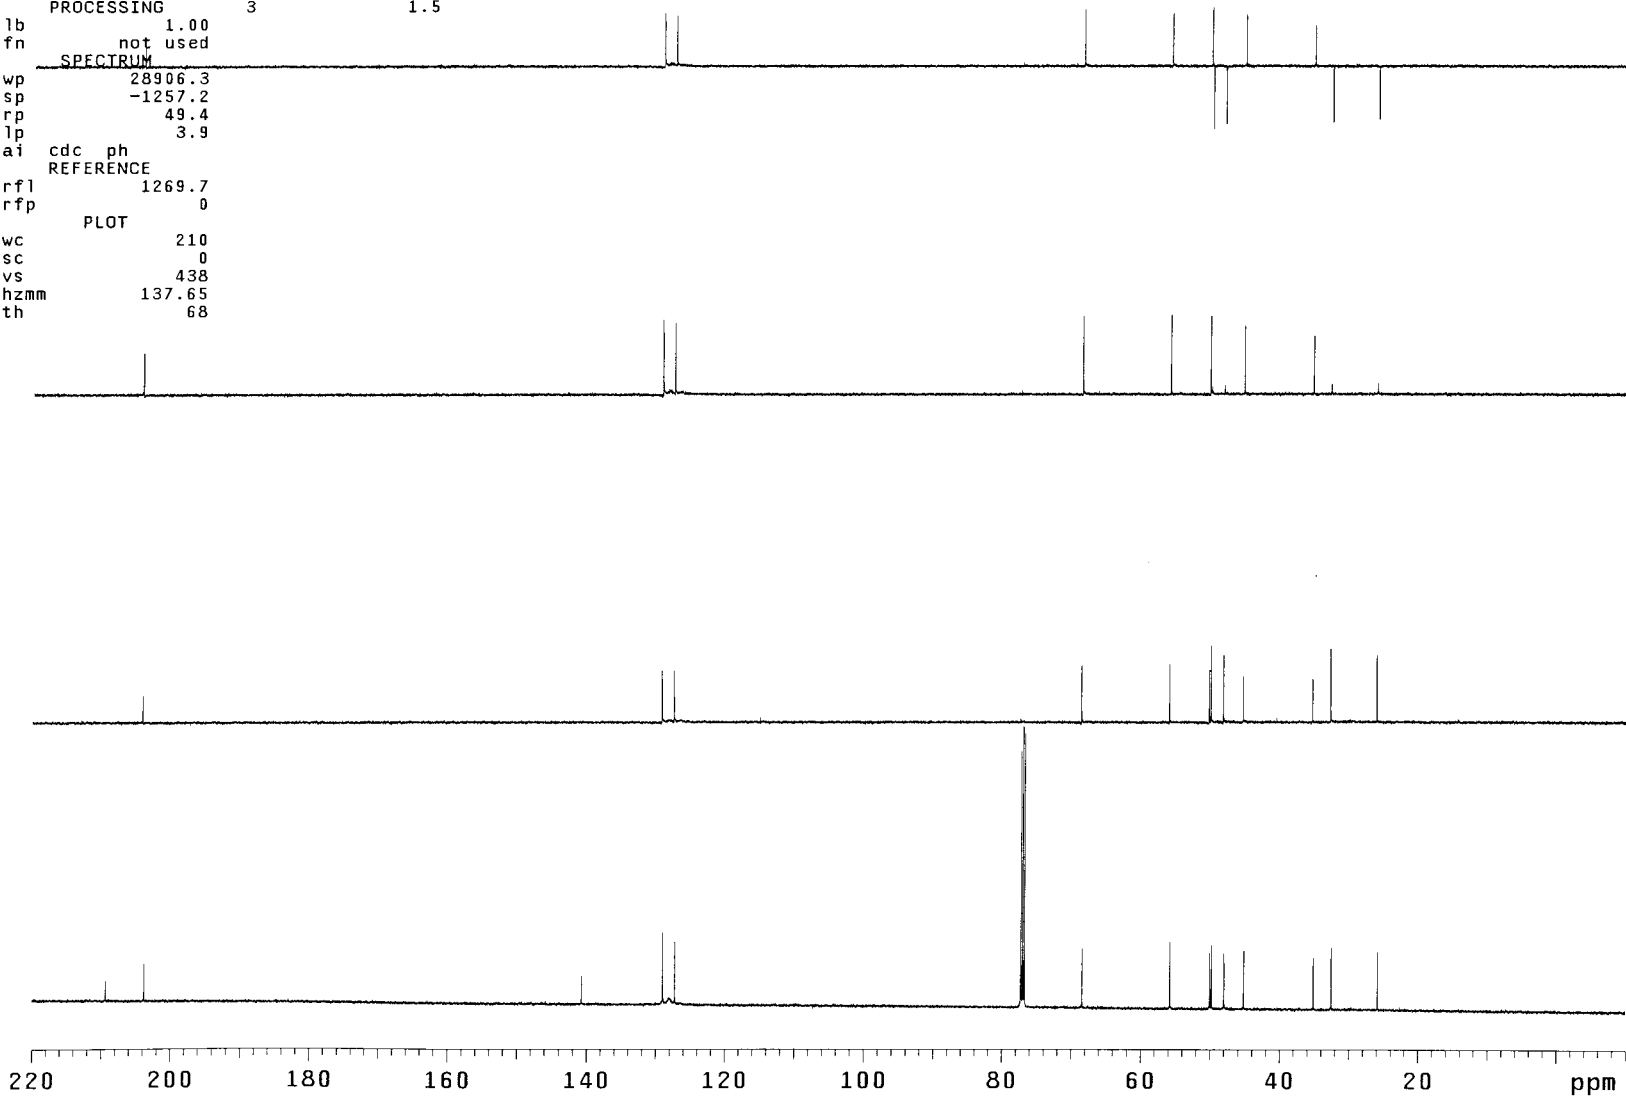

# C13 spectrum of

Fig S12. 13 NMR of 4a (100 MHz, CDCl3, 42 centidegree).

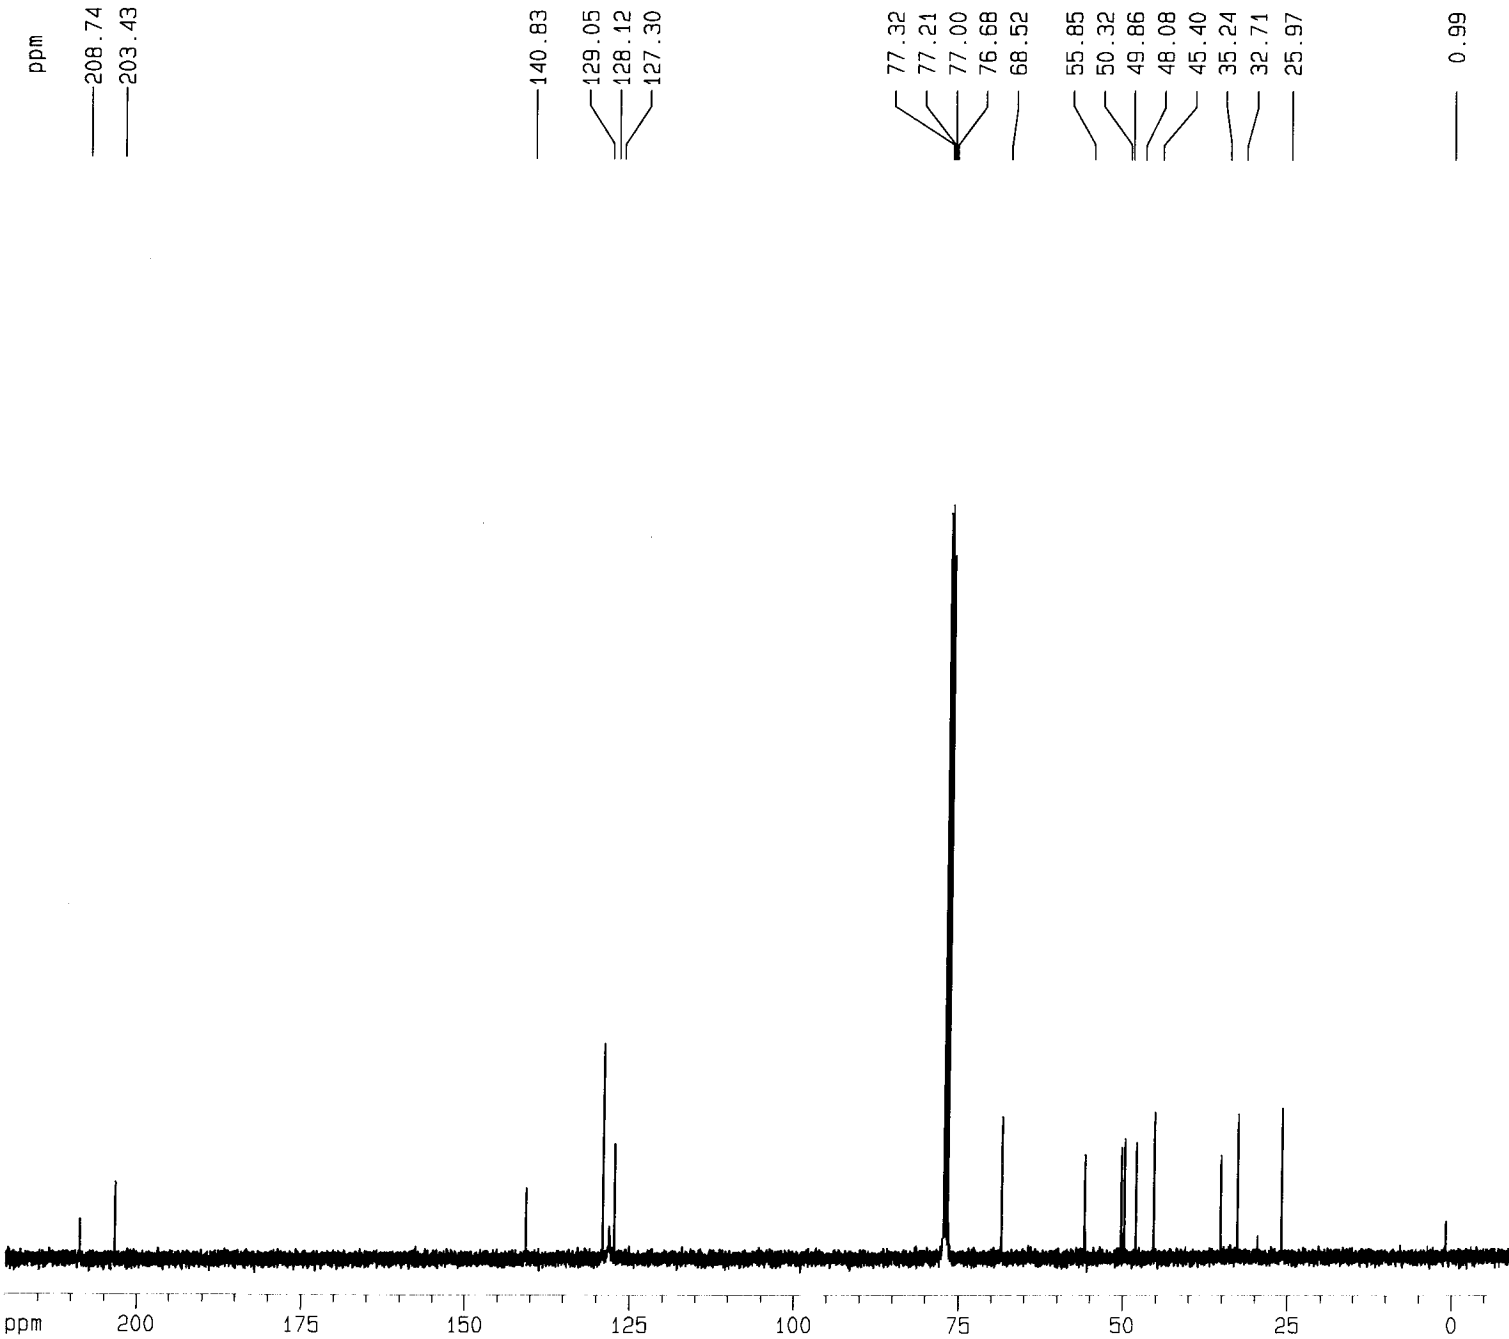

Current Data Parameters  
 NAME RYN-501  
 EXPNO 6  
 PROCNO 1

F2 - Acquisition Parameters  
 Date\_ 20090122  
 Time 16.24  
 INSTRUM spect  
 PROBHD 5 mm GNP 1H  
 PULPROG zgpg30  
 TD 65536  
 SOLVENT CDCl3  
 NS 1907  
 DS 4  
 SWH 25125.629 Hz  
 FIDRES 0.383387 Hz  
 AQ 1.3042164 sec  
 RG 5792.6  
 DW 19.900 usec  
 DE 6.50 usec  
 TE 300.0 K  
 D1 2.0000000 sec  
 d11 0.03000000 sec  
 d12 0.00002000 sec

==== CHANNEL f1 =====  
 NUC1 13C  
 P1 10.80 usec  
 PL1 0.00 dB  
 SFO1 100.6237959 MHz

==== CHANNEL f2 =====  
 CPDPRG2 waitz16  
 NUC2 1H  
 PCPD2 90.00 usec  
 PL2 -3.00 dB  
 PL12 15.70 dB  
 PL13 18.70 dB  
 SFO2 400.1326008 MHz

F2 - Processing parameters  
 SI 32768  
 SF 100.6127646 MHz  
 WDW EM  
 SSB 0  
 LB 0.30 Hz  
 GB 0  
 PC 1.40

1D NMR plot parameters  
 CX 20.00 cm  
 F1P 220.000 ppm  
 F1 22134.81 Hz  
 F2P -10.000 ppm  
 F2 -1006.13 Hz  
 PPMCM 11.50000 ppm/cm  
 HZCM 1157.04675 Hz/cm

Fig S13. DEPT of 4a (100 MHz, CDCl<sub>3</sub>, 42 centidegree).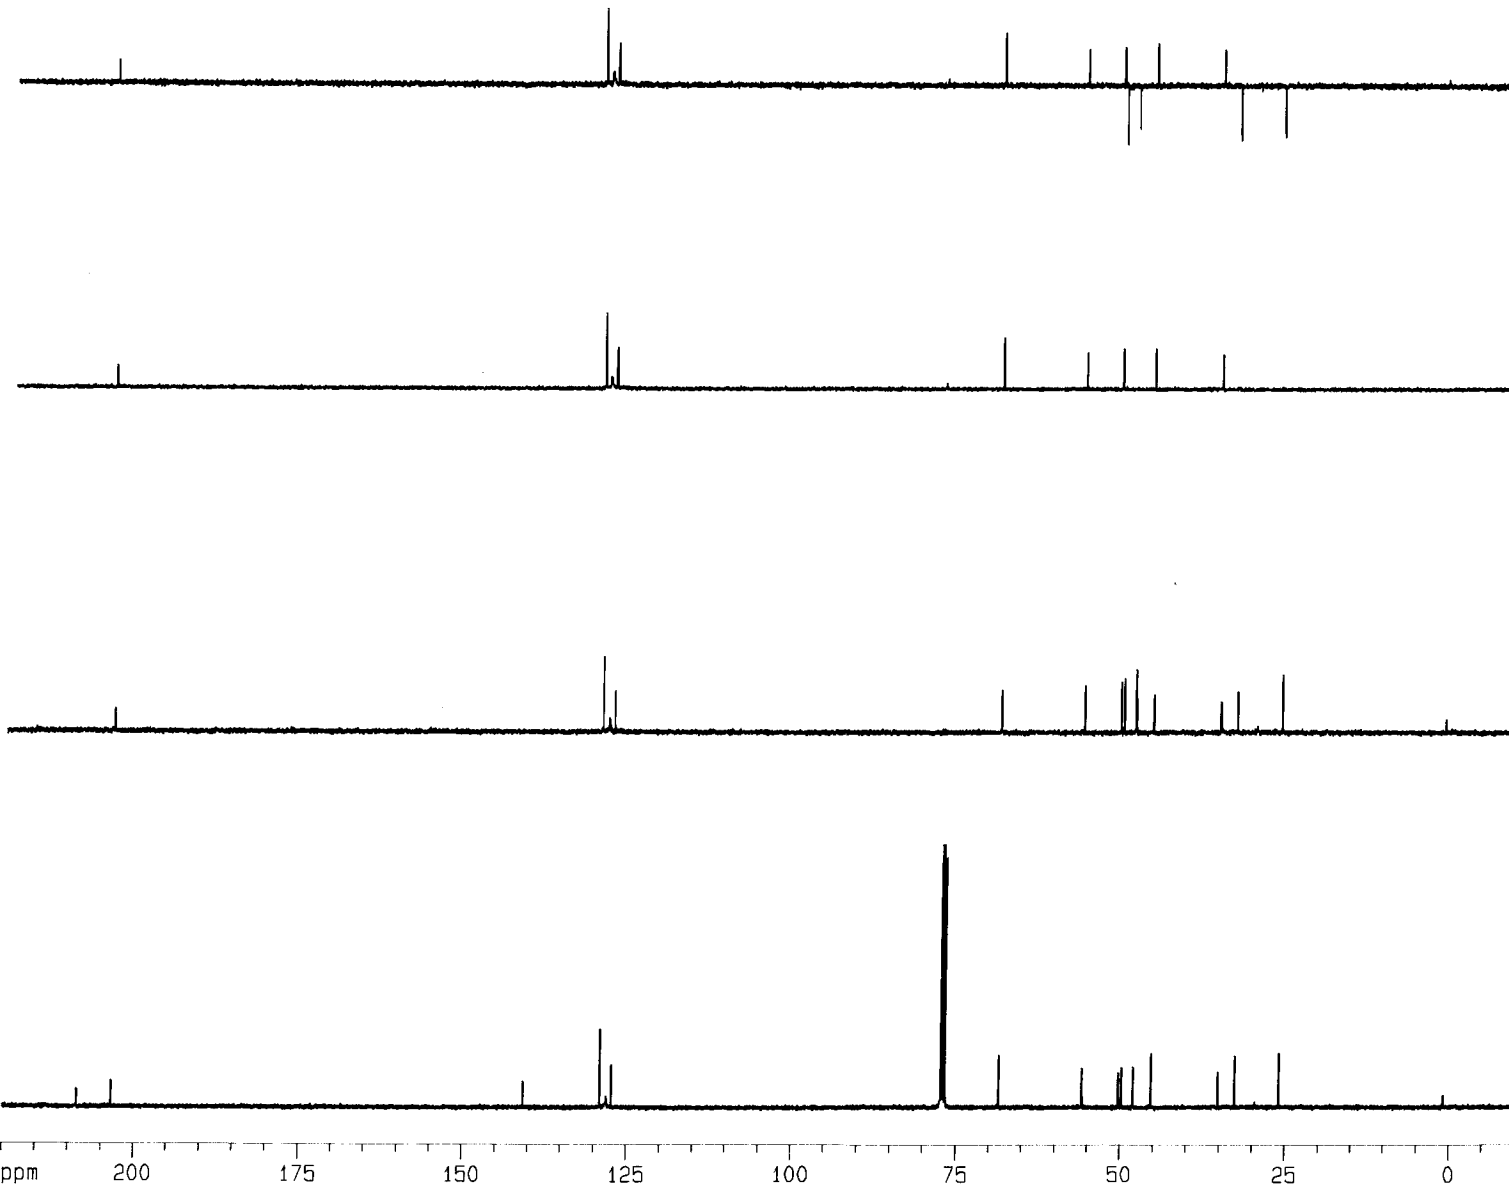

Current Data Parameters  
 NAME RYN-501  
 EXPNO 6  
 PROCNO 1

F2 - Acquisition Parameters  
 Date\_ 20090122  
 Time 18.14  
 INSTRUM spect  
 PROBHD 5 mm GNP 1H  
 PULPROG zgpg30  
 TD 65536  
 SOLVENT CDCl3  
 NS 3956  
 DS 4  
 SWH 25125.629 Hz  
 FIDRES 0.383387 Hz  
 AQ 1.3042164 sec  
 RG 5792.6  
 DW 19.900 usec  
 DE 6.50 usec  
 TE 300.0 K  
 D1 2.00000000 sec  
 d11 0.03000000 sec  
 d12 0.00002000 sec

===== CHANNEL f1 =====  
 NUC1 13C  
 P1 10.80 usec  
 PL1 0.00 dB  
 SF01 100.6237959 MHz

===== CHANNEL f2 =====  
 CPDPRG2 waltz16  
 NUC2 1H  
 PCPD2 90.00 usec  
 PL2 -3.00 dB  
 PL12 15.70 dB  
 PL13 18.70 dB  
 SF02 400.1326008 MHz

F2 - Processing parameters  
 SI 32768  
 SF 100.6127646 MHz  
 WDW EM  
 SSB 0  
 LB 0.30 Hz  
 GB 0  
 PC 1.40

1D NMR plot parameters  
 CX 20.00 cm  
 F1P 220.000 ppm  
 F1 22134.81 Hz  
 F2P -10.000 ppm  
 F2 -1006.13 Hz  
 PPMCM 11.50000 ppm/cm  
 HZCM 1157.04700 Hz/cm

Fig S14. HMQC of 4a (CDCl3).

RYN-2-113-D-F2

exp25 gHMQC

| SAMPLE         |             | FLAGS         | ACQUISITION | ARRAYS   |
|----------------|-------------|---------------|-------------|----------|
| date           | Jan 15 2009 | hs            | n           | array    |
| solvent        | cdcl3       | sspu1         | y           | phase    |
| sample         | undefined   | PFGflg        | y           | arraydim |
| ACQUISITION    |             | hsglv1        | 1026        | i        |
| sw             | 4498.4      | SPECIAL       |             | phase    |
| at             | 0.228       | temp          | not used    | 1        |
| np             | 2048        | gain          | 34          | 2        |
| fb             | 3000        | spin          | 0           |          |
| ss             | 32          | GRADIENTS     |             |          |
| d1             | 1.000       | gzlv11        | 1026        |          |
| nt             | 16          | gt1           | 0.001000    |          |
| 2D ACQUISITION |             | gzlv13        | 516         |          |
| sw1            | 21367.5     | gt3           | 0.001000    |          |
| ni             | 128         | gstab         | 0.000500    |          |
| phase          | arrayed     | F2 PROCESSING |             |          |
| TRANSMITTER    |             | gf            | 0.105       |          |
| tn             | H1          | gfs           | not used    |          |
| sfrq           | 499.836     | fn            | 2048        |          |
| tof            | 249.8       | F1 PROCESSING |             |          |
| tpwr           | 57          | gf1           | 0.006       |          |
| pw             | 13.000      | gfs1          | not used    |          |
| DECOUPLER      |             | proc1         | 1p          |          |
| dn             | C13         | fn1           | 2048        |          |
| dof            | -2515.1     | DISPLAY       |             |          |
| dm             | nny         | sp            | 511.4       |          |
| dmm            | ccp         | wp            | 3461.7      |          |
| dmf            | 32258       | sp1           | 2526.0      |          |
| dpwr           | 35          | wp1           | 14606.7     |          |
| pwxlvl         | 51          | rfl           | 1392.8      |          |
| pwx            | 14.700      | rfp           | 1877.9      |          |
| HMQC           |             | rfl1          | 9895.4      |          |
| j1xh           | 140.0       | rfp1          | 8602.8      |          |
| nullflg        | y           | PLOT          |             |          |
|                |             | wc            | 150.0       |          |
|                |             | sc            | 6.2         |          |
|                |             | wc2           | 116.2       |          |
|                |             | sc2           | 0           |          |
|                |             | vs            | 28          |          |
|                |             | th            | 6           |          |
|                |             | ai            | cdc         | ph       |

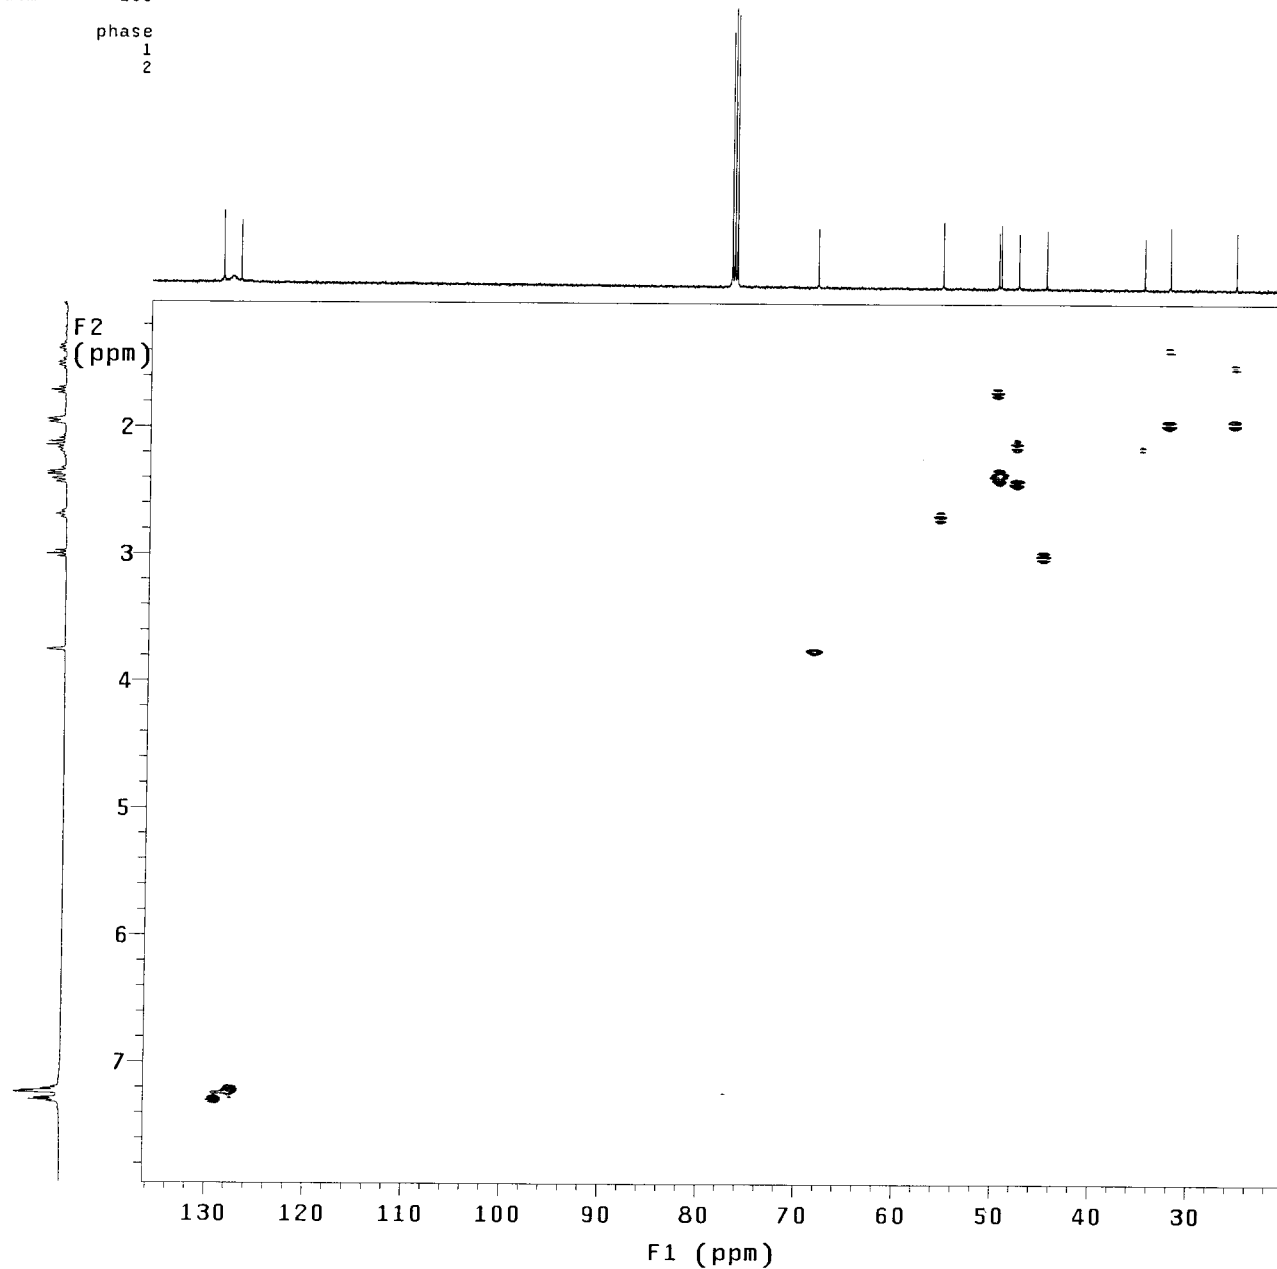

Fig S15. COSY of 4a (CDCl3).

S15

RYN-2-113-D-F2

exp10 gCOSY

| SAMPLE         |             | FLAGS         |          |
|----------------|-------------|---------------|----------|
| date           | Jan 16 2009 | hs            | nn       |
| solvent        | cdcl3       | sspul         | n        |
| sample         | undefined   | hsglv         | 1026     |
| ACQUISITION    |             | SPECIAL       |          |
| sw             | 4498.4      | temp          | not used |
| at             | 0.228       | gain          | 30       |
| np             | 2048        | spin          | 0        |
| fb             | 3000        | F2 PROCESSING |          |
| ss             | 16          | sb            | -0.114   |
| d1             | 1.000       | sbs           | not used |
| nt             | 16          | fn            | 2048     |
| 2D ACQUISITION |             | F1 PROCESSING |          |
| sw1            | 4498.4      | sb1           | -0.028   |
| ni             | 128         | sbs1          | not used |
| TRANSMITTER    |             | DISPLAY       |          |
| tn             | H1          | fn1           | 2048     |
| sfrq           | 499.836     | sp            | 495.7    |
| tof            | 249.8       | wp            | 4494.0   |
| tpwr           | 57          | sp1           | 496.7    |
| pw             | 13.000      | wp1           | 4494.0   |
| GRADIENTS      |             | rfl           | 1386.6   |
| gzlv11         | 1026        | rfp           | 1877.9   |
| gt1            | 0.001000    | rfl1          | 1385.5   |
| gstab          | 0.000500    | rfp1          | 1877.9   |
| DECOUPLER      |             | PLOT          |          |
| dn             | C13         | wc            | 155.0    |
| dm             | nnn         | sc            | 10.0     |
|                |             | wc2           | 155.0    |
|                |             | sc2           | 0        |
|                |             | vs            | 1814     |
|                |             | th            | 9        |
|                |             | ai            | cdc av   |

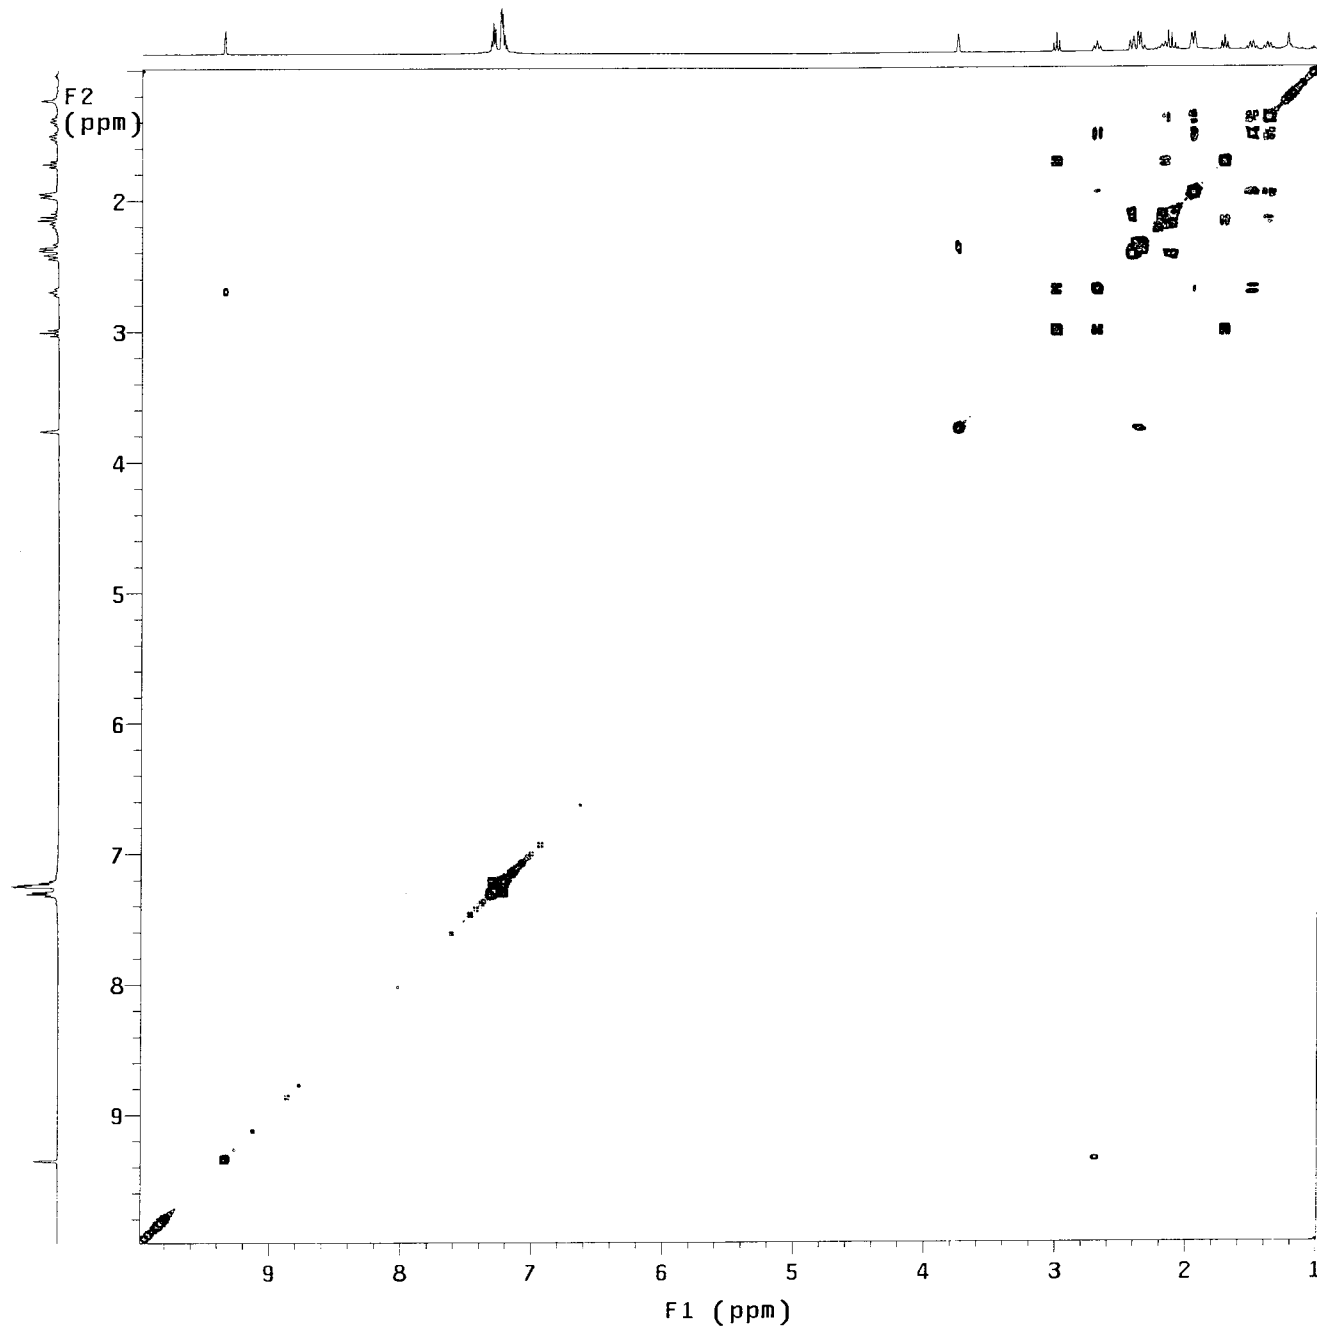

Fig S16. NOESY of 4a (CDCl<sub>3</sub>).

RYN-2-113-D-F2

exp11 NOESY

|                |             |               |          |
|----------------|-------------|---------------|----------|
| date           | Jan 16 2009 | hs            | n        |
| solvent        | cdcl3       | sspul         | y        |
| sample         | undefined   | PFGflg        | y        |
| ACQUISITION    |             | hsglvl        | 1026     |
| sw             | 4498.4      | SPECIAL       |          |
| at             | 0.228       | temp          | not used |
| np             | 2048        | gain          | 30       |
| fb             | 3000        | spin          | 0        |
| ss             | 32          | F2 PROCESSING |          |
| d1             | 1.000       | gf            | 0.105    |
| nt             | 8           | gfs           | not used |
| 2D ACQUISITION |             | fn            | 2048     |
| sw1            | 4498.4      | F1 PROCESSING |          |
| ni             | 200         | gf1           | 0.041    |
| TRANSMITTER    |             | gfs1          | not used |
| tn             | H1          | procl         | lp       |
| sfrq           | 499.836     | fn1           | 2048     |
| tof            | 249.8       | DISPLAY       |          |
| tpwr           | 57          | sp            | 497.7    |
| pw             | 13.000      | wp            | 4494.0   |
| NOESY          |             | sp1           | 500.0    |
| mix            | 0.600       | wp1           | 4494.0   |
| PRESATURATION  |             | rfl           | 1384.6   |
| satmode        | nnnn        | rfl1          | 1877.9   |
| satpwr         | 0           | rfl1          | 1382.3   |
| satdly         | 0           | rfl1          | 1877.9   |
| satfrq         | 0           | PLOT          |          |
| DECOUPLER      |             | wc            | 155.0    |
| dn             | C13         | sc            | 10.0     |
| dm             | nnn         | wc2           | 155.0    |
|                |             | sc2           | 0        |
|                |             | vs            | 1814     |
|                |             | th            | 4        |
|                |             | ai            | ph       |

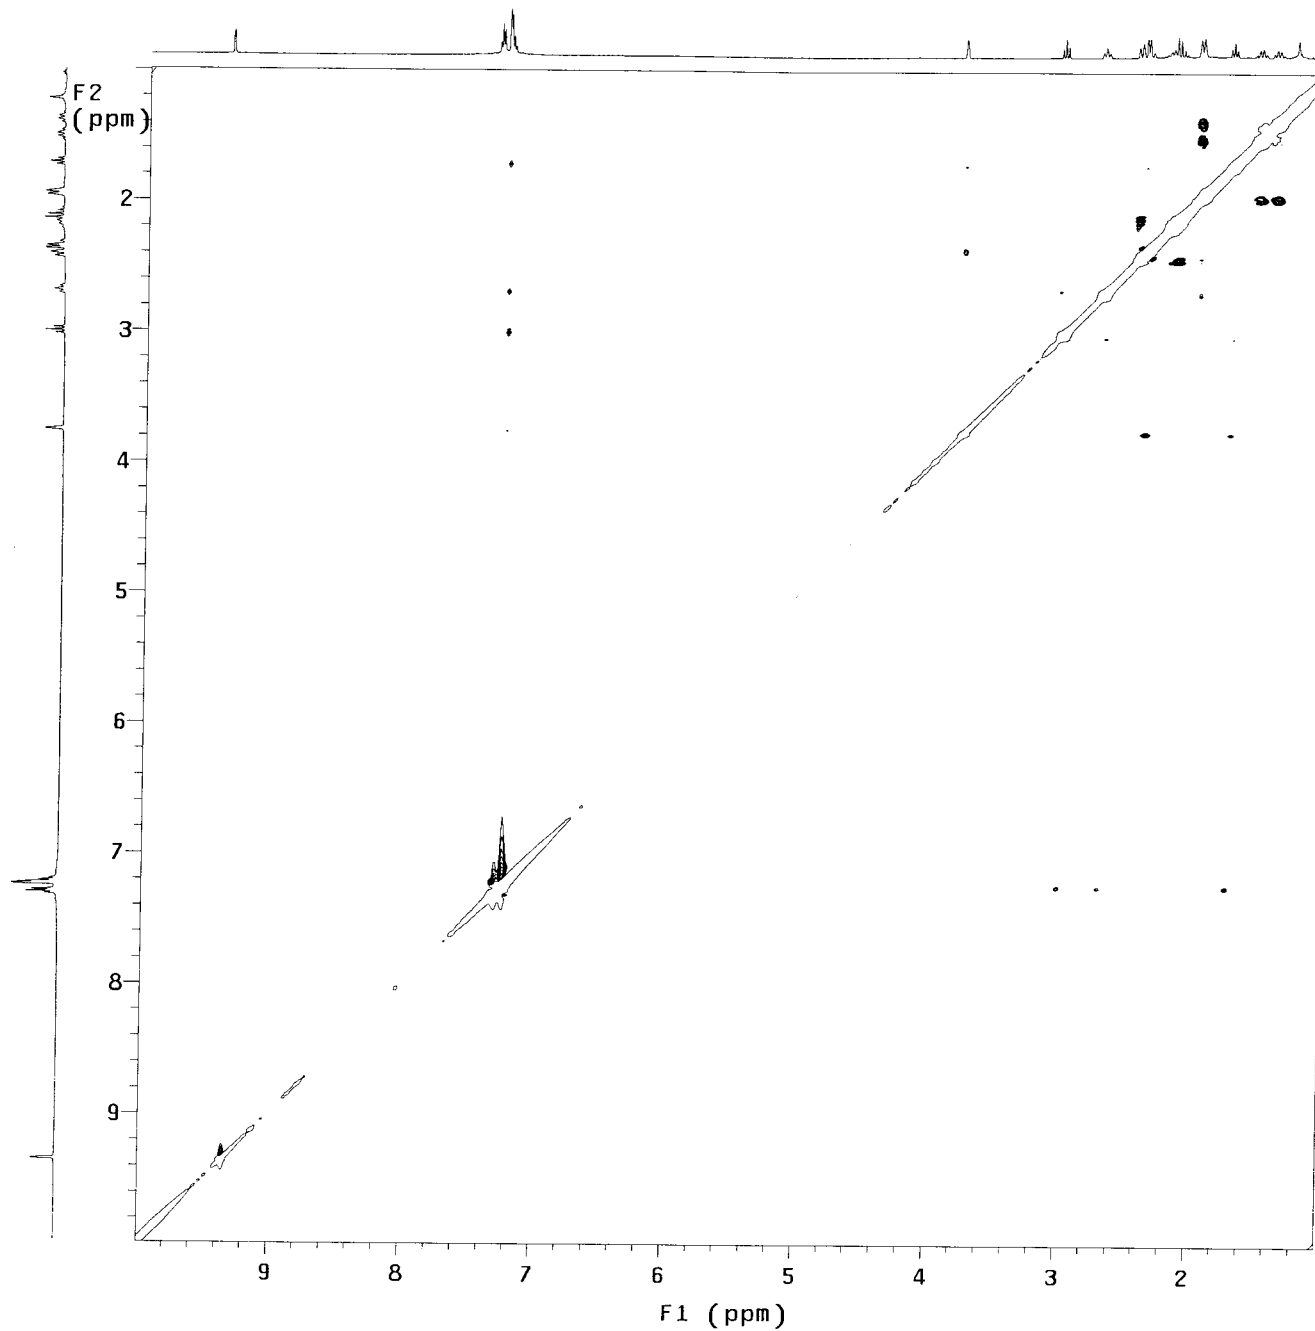



Fig S17. 1H NMR of 5a (500 MHz, CDCl3).

```

RYN-2-115
exp21 s2pu1
SAMPLE
date Oct 14 2008 dfrq 125.695
solvent cdc13 dn C13
file exp dpwr 30
ACQUISITION
sfrq 499.836 dof 0
tn H1 dm nnn
at 3.000 dmf 200
np 48000 dseq
sw 8000.0 dres 1.0
fb 4000 homo n
bs 4
tpwr 57 wtfile
pw 4.8 proc ft
d1 1.000 fn not used
tof 499.7 math f
nt 4
ct 4 werr react
alock y wexp procplot
gain not used wbs
FLAGS wnt wft
il n
in n
dp y
hs nn
DISPLAY
sp -250.1
wp 5498.0
vs 50
sc 0
wc 210
hzmm 26.18
is 137.78
rf1 4632.8
rfp 3618.8
th 5
ins 100.000
nm ph
    
```

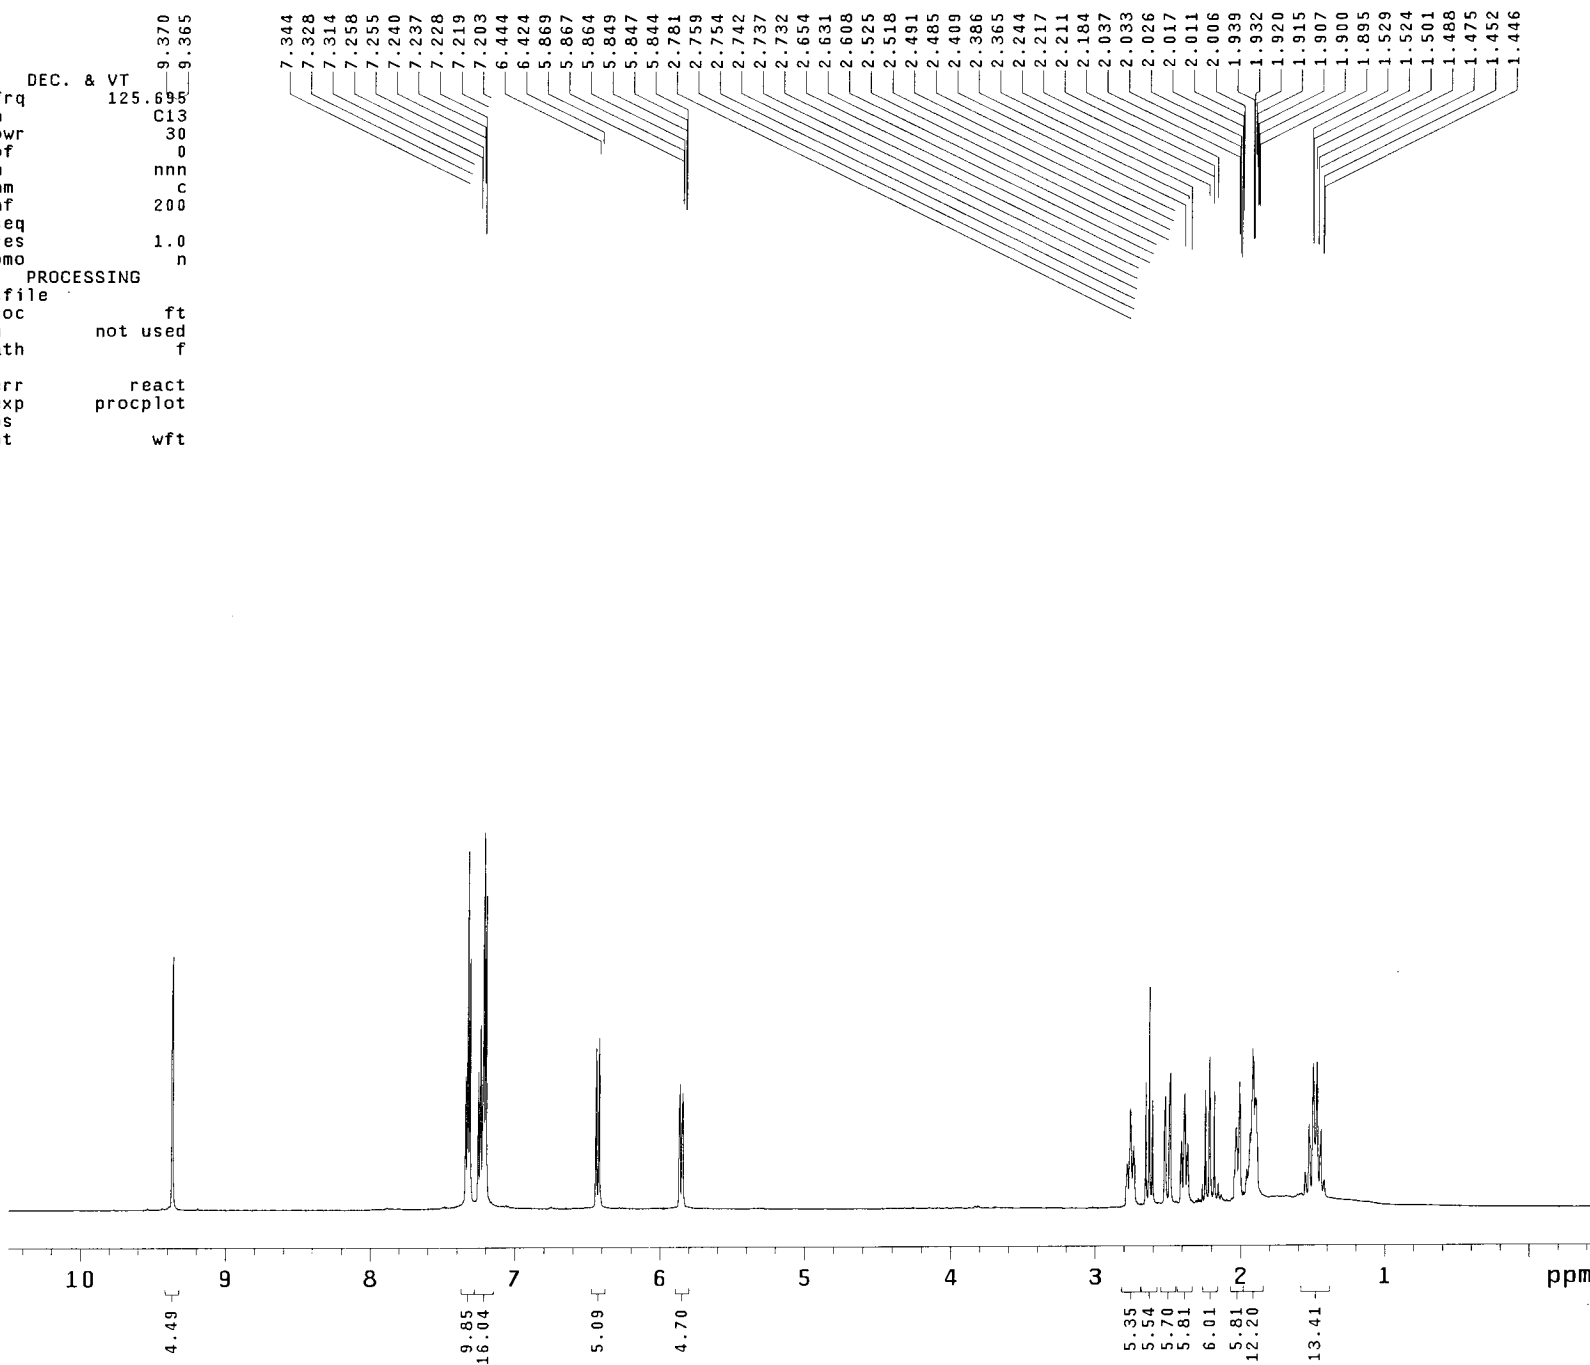

```

RYN-2-115
exp28 s2pul

SAMPLE
date Oct 14 2008 dfrq 499.836
solvent cdc13 dn H1
file exp dpwr 39
ACQUISITION
sfrq 125.698 dm yyy
tn C13 dmm w
at 1.000 dmf 11905
np 62894 dseq
sw 31446.5 dres 1.0
fb 17000 homo n
bs 16
ss 2 lb 1.00
tpwr 54 wtfile
pw 4.0 proc ft
di 1.000 fn not used
tof 2512.2 math f
nt 5000
ct 5000 werr react
alock y wexp procp
gain not used wbs testsn
wnt

FLAGS
il n
in n
dp y
hs nn

DISPLAY
sp -1256.9
wp 27650.1
vs 50
sc 0
wc 210
hzmm 131.67
is 500.00
rfl 10983.4
rfp 9677.6
th 4
ins 100.000
nm ph

```

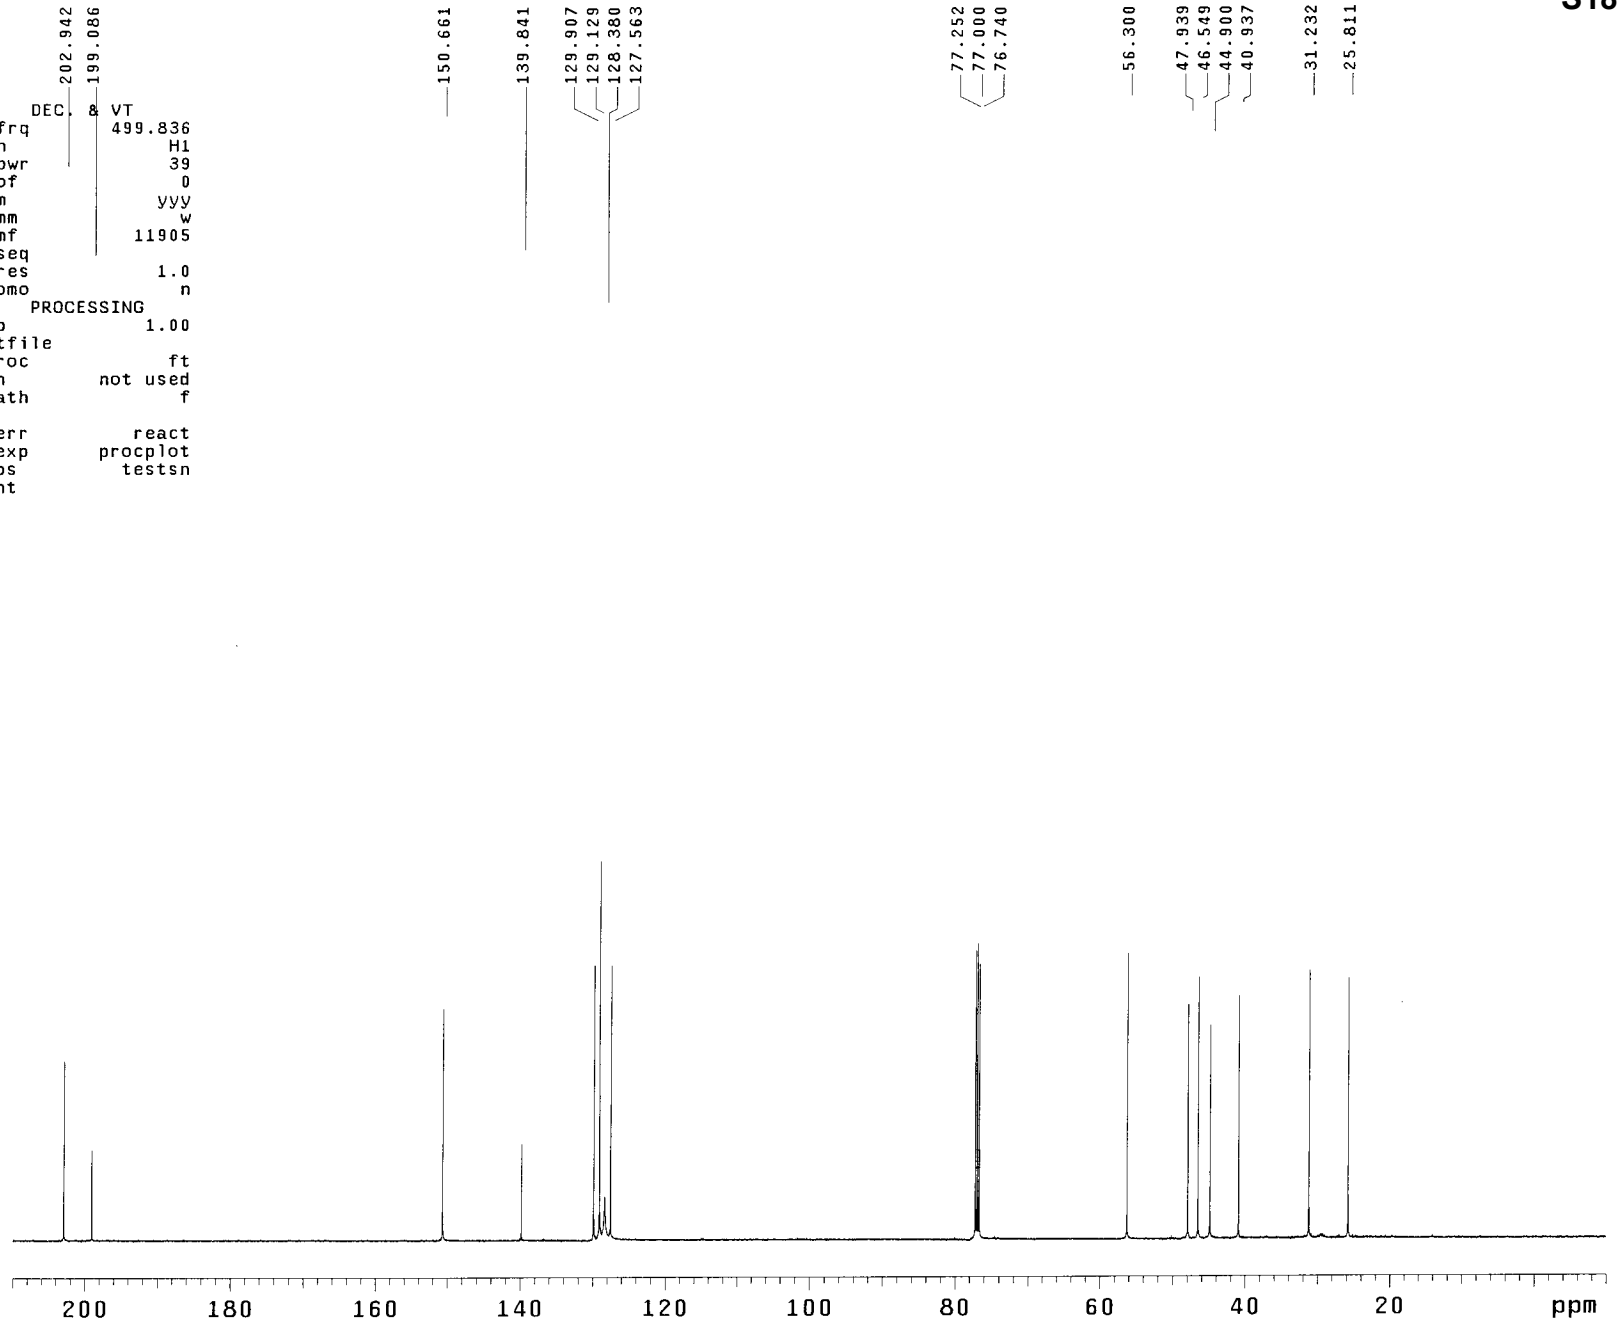Fig S18.  $^{13}\text{C}$  NMR of 5a (125 MHz,  $\text{CDCl}_3$ ).

Fig S19. DEPT of 5a (CDCl3).

RYN-2-115

exp23 DEPT

|         |             |            |          |       |             |        |
|---------|-------------|------------|----------|-------|-------------|--------|
| date    | Oct 14 2008 | j1xh       | DEPT     | 140.0 | ACQUISITION | ARRAYS |
| solvent | cdc13       | mult       | arrayed  |       | array       | mult   |
| sample  | undefined   |            |          |       | arraydim    | 3      |
|         |             |            | SPECIAL  |       |             |        |
| sw      | 31446.5     | temp       | not used | i     | mult        |        |
| at      | 1.000       | gain       | 50       | 1     | 0.5         |        |
| np      | 62894       | spin       | 0        | 2     | 1           |        |
| bs      | 16          | PROCESSING | 1.00     | 3     | 1.5         |        |
| ss      | -4          | fn         | not used |       |             |        |
| d1      | 1.000       | SPECTRUM   |          |       |             |        |
| nt      | 1000        | wp         | 27650.1  |       |             |        |
| ct      | 1000        | sp         | -1257.2  |       |             |        |
|         |             | rp         | 34.1     |       |             |        |
| tn      | C13         | lp         | 37.1     |       |             |        |
| tof     | 2512.2      | ai         | cdc ph   |       |             |        |
| tpwr    | 54          | REFERENCE  |          |       |             |        |
| pw      | 9.400       | rfl        | 1269.7   |       |             |        |
|         |             | rfp        | 0        |       |             |        |
| dn      | H1          | PLOT       |          |       |             |        |
| dof     | 0           | wc         | 210      |       |             |        |
| dpwr    | 39          | sc         | 0        |       |             |        |
| dm      | nny         | vs         | 250      |       |             |        |
| dmm     | ccw         | hzmm       | 131.67   |       |             |        |
| dmf     | 11905       | th         | 68       |       |             |        |
| pplvl   | 49          |            |          |       |             |        |
| pp      | 29.400      |            |          |       |             |        |

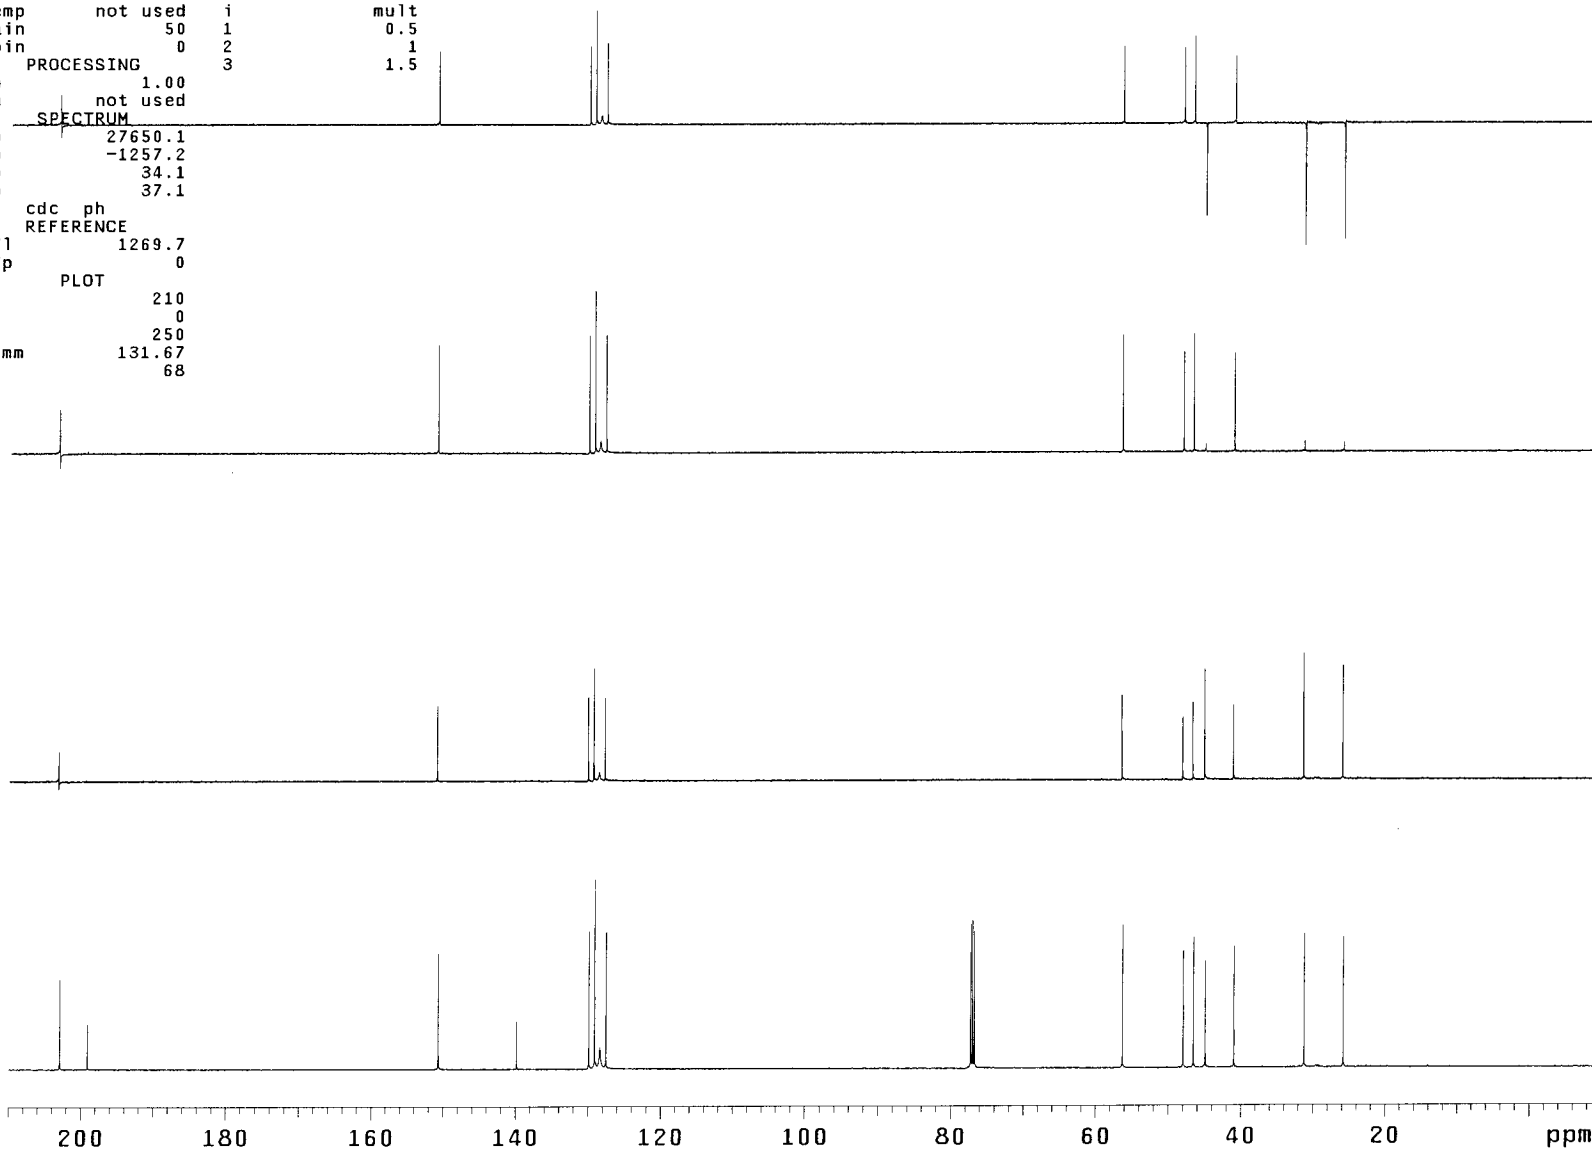

Fig S20. COSY of 5a (CDCl3).

RYN-2-115

exp24 gCOSY

|                |             |               |          |      |
|----------------|-------------|---------------|----------|------|
| date           | Oct 14 2008 | hs            | FLAGS    | nn   |
| solvent        | cdc13       | sspul         |          | n    |
| sample         | undefined   | hsglv1        |          | 1026 |
| ACQUISITION    |             | SPECIAL       |          |      |
| sw             | 4298.5      | temp          | not used |      |
| at             | 0.238       | gain          | 50       |      |
| np             | 2048        | spin          | 0        |      |
| fb             | 2000        | F2 PROCESSING |          |      |
| ss             | 16          | sb            | -0.119   |      |
| d1             | 1.000       | sbs           | not used |      |
| nt             | 16          | fn            | 2048     |      |
| 2D ACQUISITION |             | F1 PROCESSING |          |      |
| sw1            | 4298.5      | sb1           | -0.030   |      |
| ni             | 128         | sbs1          | not used |      |
| TRANSMITTER    |             | proc1         |          |      |
| tn             | H1          | fn1           | 2048     |      |
| sfrq           | 499.836     | DISPLAY       |          |      |
| tof            | 349.8       | sp            | 689.6    |      |
| tpwr           | 57          | wp            | 4294.3   |      |
| pw             | 13.000      | sp1           | 690.2    |      |
| GRADIENTS      |             | wp1           | 4294.3   |      |
| gzlv11         | 1026        | rfl           | 2528.5   |      |
| gt1            | 0.001000    | rfp           | 3213.9   |      |
| gstab          | 0.000500    | rfl1          | 2527.9   |      |
| DECOUPLER      |             | rfp1          | 3213.9   |      |
| dn             | C13         | PLOT          |          |      |
| dm             | nnn         | wc            | 155.0    |      |
|                |             | sc            | 10.0     |      |
|                |             | wc2           | 155.0    |      |
|                |             | sc2           | 0        |      |
|                |             | vs            | 28       |      |
|                |             | th            | 7        |      |
|                |             | ai            | cdc av   |      |

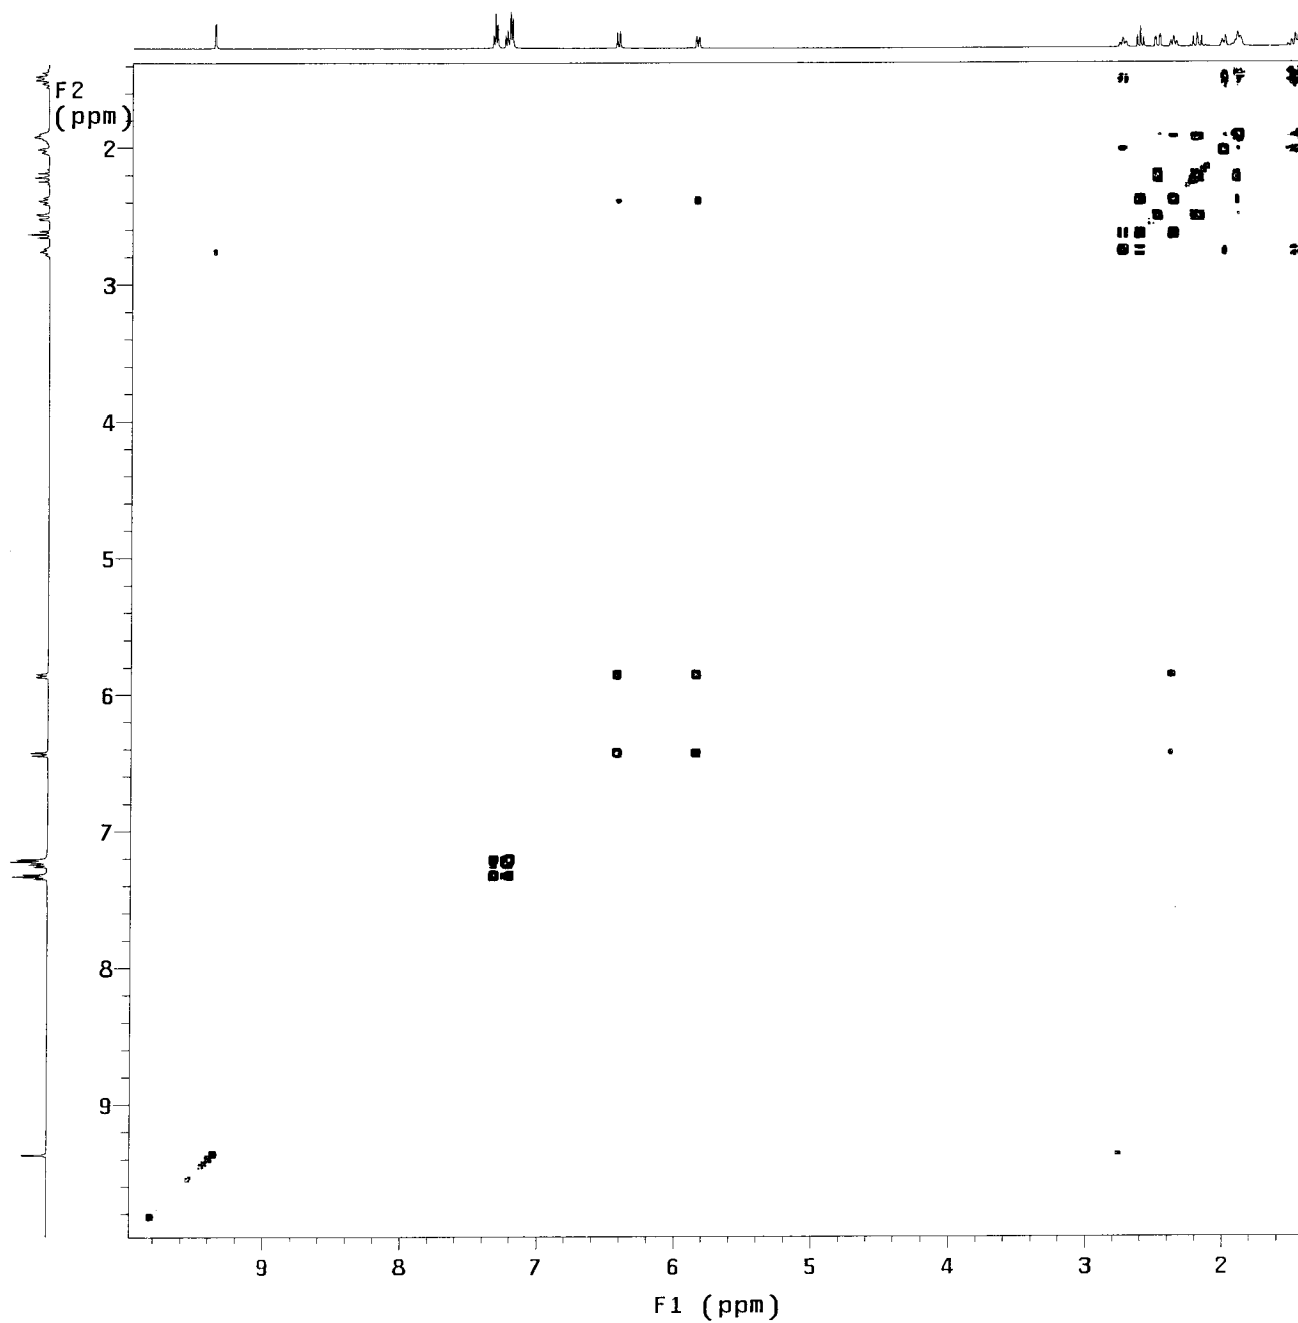

Fig S21. HMQC of 5a (CDCl<sub>3</sub>).

RYN-2-115

exp25 gHMQC

| SAMPLE         |             | FLAGS         | ACQUISITION | ARRAYS   |
|----------------|-------------|---------------|-------------|----------|
| date           | Oct 14 2008 | hs            | n           | array    |
| solvent        | cdc13       | sspul         | y           | phase    |
| sample         | undefined   | PFGflg        | y           | arraydim |
| ACQUISITION    | hsglv1      | 1026          | 1           | phase    |
| sw             | 4298.5      | SPECIAL       | 1           | 1        |
| at             | 0.238       | temp          | not used    | 2        |
| np             | 2048        | gain          | 50          |          |
| fb             | 2000        | spin          | 0           |          |
| ss             | 32          | GRADIENTS     |             |          |
| d1             | 1.000       | gzlv11        | 1026        |          |
| nt             | 16          | gt1           | 0.001000    |          |
| 2D ACQUISITION | gzlv13      | 516           |             |          |
| sw1            | 21367.5     | gt3           | 0.001000    |          |
| ni             | 128         | gstab         | 0.000500    |          |
| phase          | arrayed     | F2 PROCESSING |             |          |
| TRANSMITTER    | gf          | 0.110         |             |          |
| tn             | H1          | gfs           | not used    |          |
| sfrq           | 499.836     | fn            | 2048        |          |
| tof            | 349.8       | F1 PROCESSING |             |          |
| tpwr           | 57          | gf1           | 0.006       |          |
| pw             | 13.000      | gfs1          | not used    |          |
| DECOUPLER      | proc1       | 1p            |             |          |
| dn             | C13         | fn1           | 2048        |          |
| dof            | -2515.1     | DISPLAY       |             |          |
| dm             | nny         | sp            | 703.9       |          |
| dmm            | ccp         | wp            | 3333.0      |          |
| dmf            | 32258       | sp1           | 1961.4      |          |
| dpwr           | 35          | wp1           | 17715.8     |          |
| pwxlvl         | 51          | rfl           | 2531.0      |          |
| pw             | 14.700      | rfp           | 3213.9      |          |
| HMQC           | rfl1        | 20229.2       |             |          |
| j1xh           | 140.0       | rfp1          | 18935.4     |          |
| nullflg        | y           | PLOT          |             |          |
|                | wc          | 150.0         |             |          |
|                | sc          | 6.2           |             |          |
|                | wc2         | 116.2         |             |          |
|                | sc2         | 0             |             |          |
|                | vs          | 28            |             |          |
|                | th          | 5             |             |          |
|                | ai          | cdc           | ph          |          |

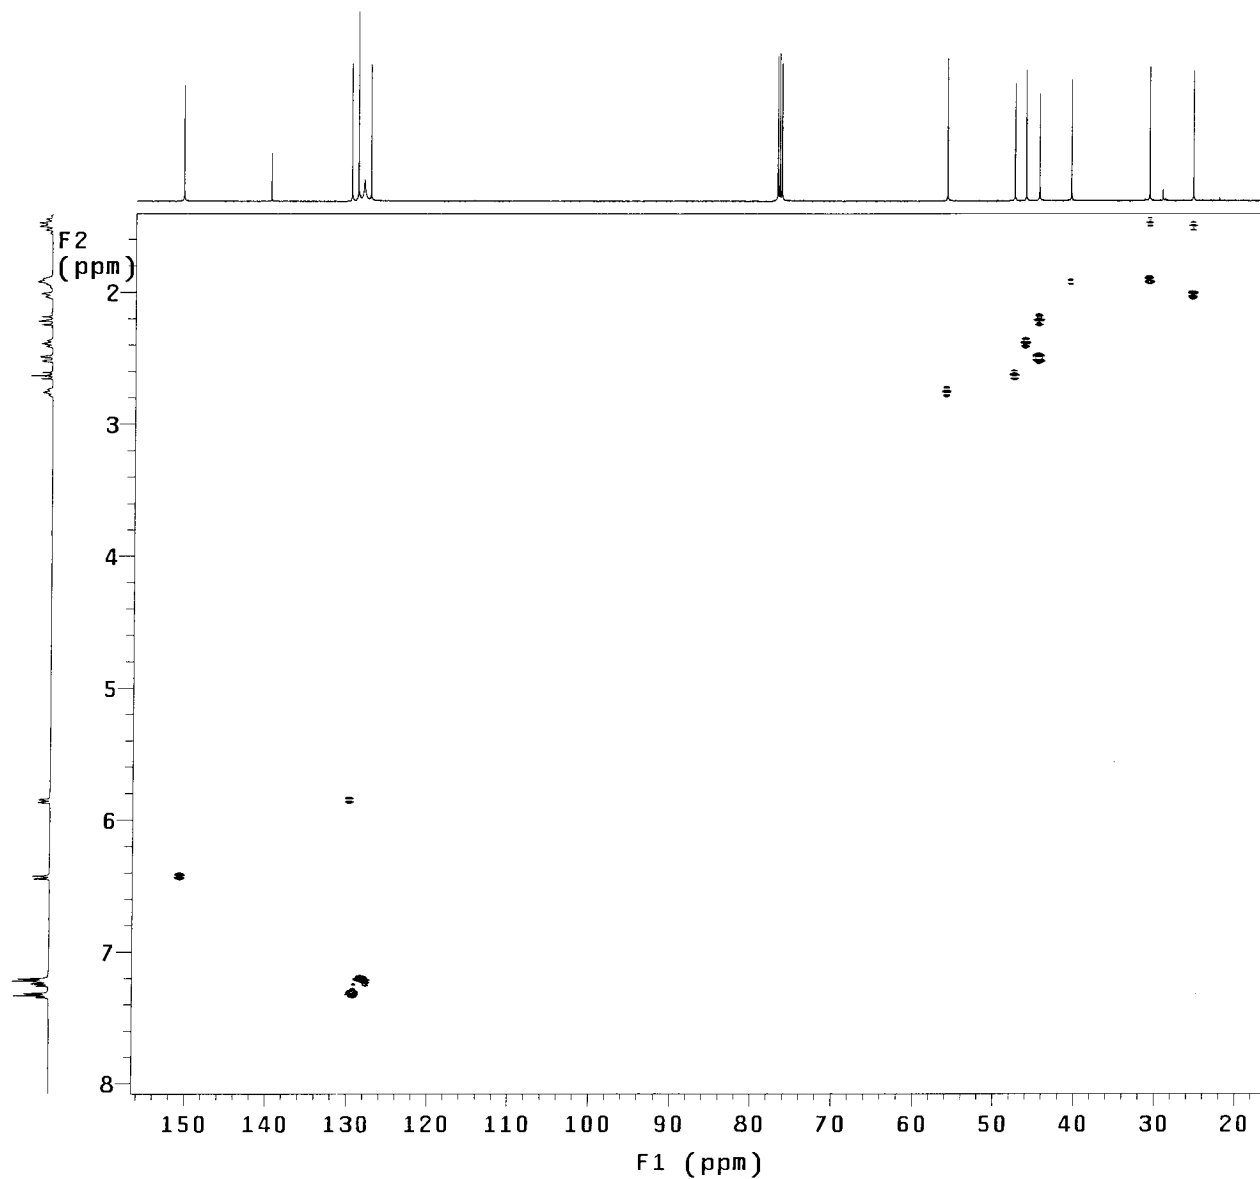

RYN-2-115

exp30 NOESY

| SAMPLE         |             | FLAGS         |          |
|----------------|-------------|---------------|----------|
| date           | Oct 16 2008 | hs            | n        |
| solvent        | cdcl3       | sspul         | y        |
| sample         | undefined   | PFGflg        | y        |
| ACQUISITION    |             | hsglv1        | 1026     |
| sw             | 4298.5      | SPECIAL       |          |
| at             | 0.238       | temp          | not used |
| np             | 2048        | gain          | 24       |
| fb             | 2000        | spin          | 0        |
| ss             | 32          | F2 PROCESSING |          |
| d1             | 1.000       | gf            | 0.110    |
| nt             | 16          | gfs           | not used |
| 2D ACQUISITION |             | fn            | 2048     |
| sw1            | 4298.5      | F1 PROCESSING |          |
| ni             | 200         | gf1           | 0.043    |
| TRANSMITTER    |             | gfs1          | not used |
| tn             | H1          | procl         | lp       |
| sfrq           | 499.836     | fn1           | 2048     |
| tof            | 349.8       | DISPLAY       |          |
| tpwr           | 57          | sp            | 688.0    |
| pw             | 13.000      | wp            | 4294.3   |
| NOESY          |             | sp1           | 688.2    |
| mix            | 0.400       | wp1           | 4294.3   |
| PRESATURATION  |             | rfl           | 2530.1   |
| satmode        | nnnn        | rfp           | 3213.9   |
| satpwr         | 0           | rfl1          | 2529.9   |
| satdly         | 0           | rfp1          | 3213.9   |
| satfrq         | 0           | PLOT          |          |
| DECOUPLER      |             | wc            | 155.0    |
| dn             | C13         | sc            | 10.0     |
| dm             | nnn         | wc2           | 155.0    |
|                |             | sc2           | 0        |
|                |             | vs            | 28       |
|                |             | th            | 4        |
|                |             | ai            | ph       |

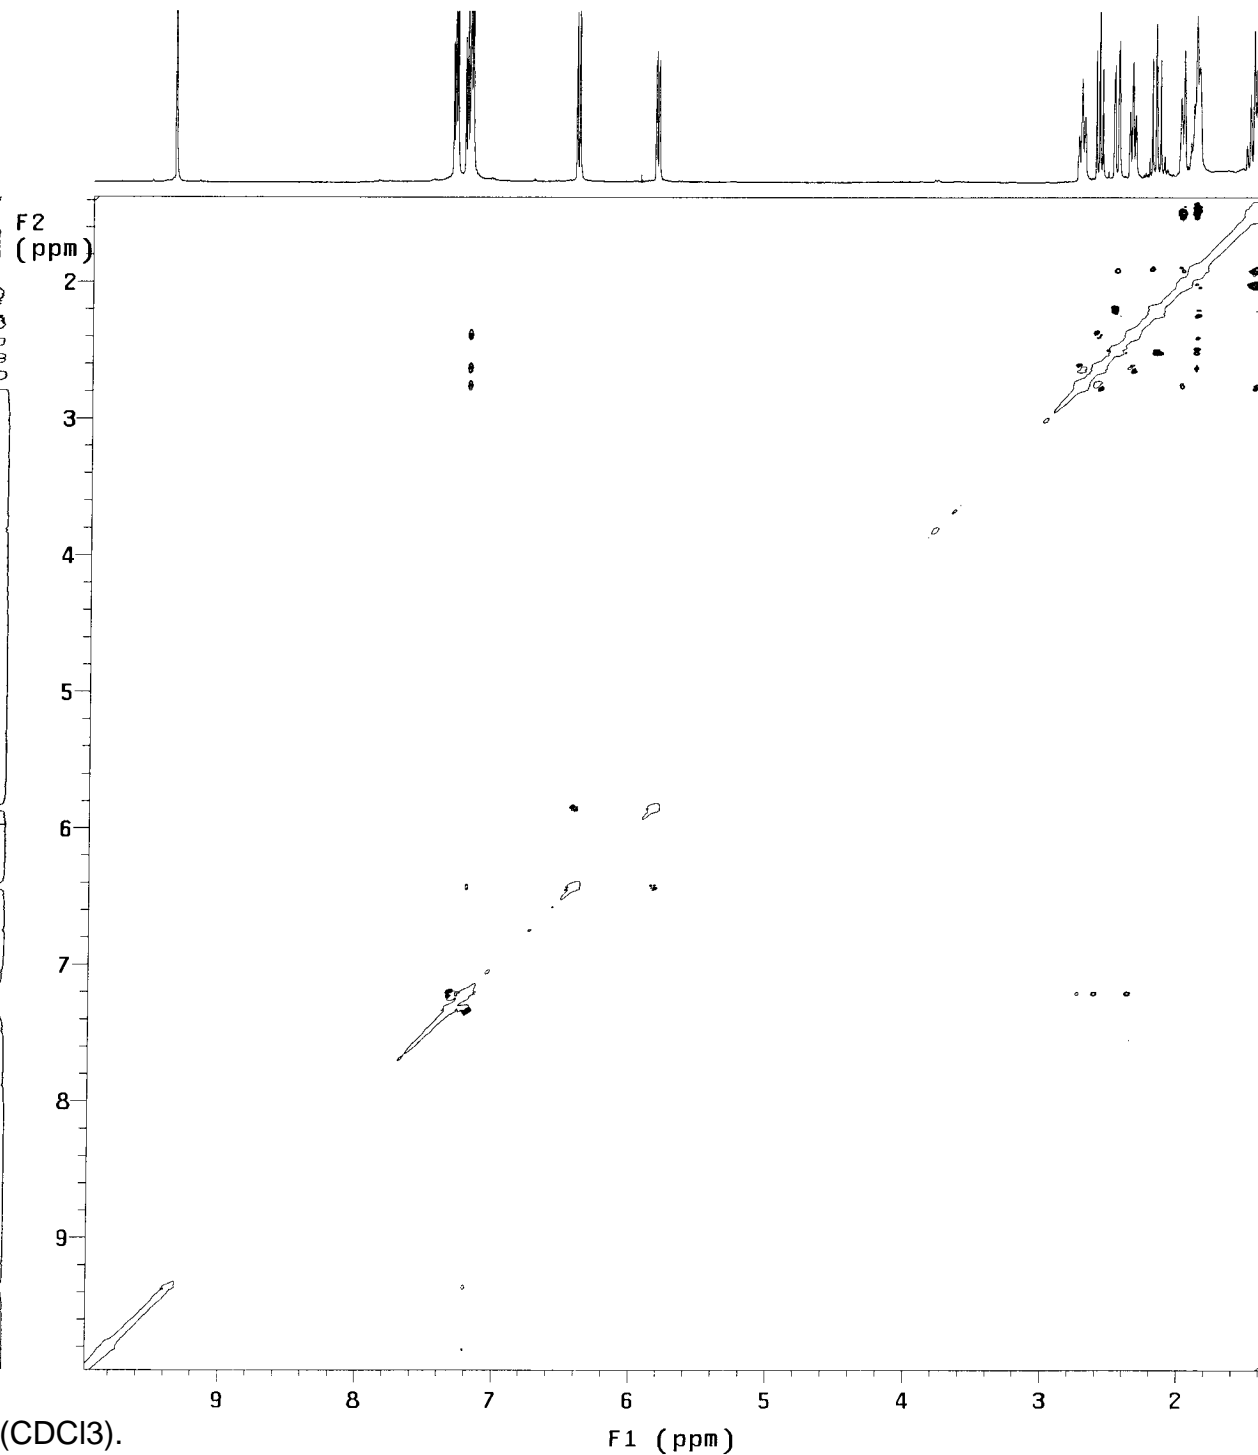Fig S22. NOESY of 5a (CDCl<sub>3</sub>).

F1 (ppm)

Fig S23. <sup>1</sup>H NMR of 5b (500 MHz, CDCl<sub>3</sub>).

```

EYN-2-122
exp38 s2pu1
SAMPLE
date Oct 22 2008 dfrq DEC. & VT 125.695
solvent cdc13 dn C13
file exp dpwr 30
ACQUISITION dof 0
sfrq 499.836 dm nnn
tn H1 dmm c
at 3.000 dmf 200
np 48000 dseq
sw 8000.0 dres 1.0
fb 4000 homo n
bs 4
tpwr 57 wtfile
pw 4.8 proc ft
d1 1.000 fn not used
tof 499.7 math f
nt 4
ct 4 werr react
alock y wexp procplot
gain not used wbs
FLAGS wnt wft
il n
in n
dp y
hs nn
DISPLAY
sp -250.1
wp 5498.0
vs 57
sc 0
wc 210
hzmm 26.18
is 124.04
rfl 4632.1
rfp 3618.8
th 4
ins 100.000
nm ph
    
```

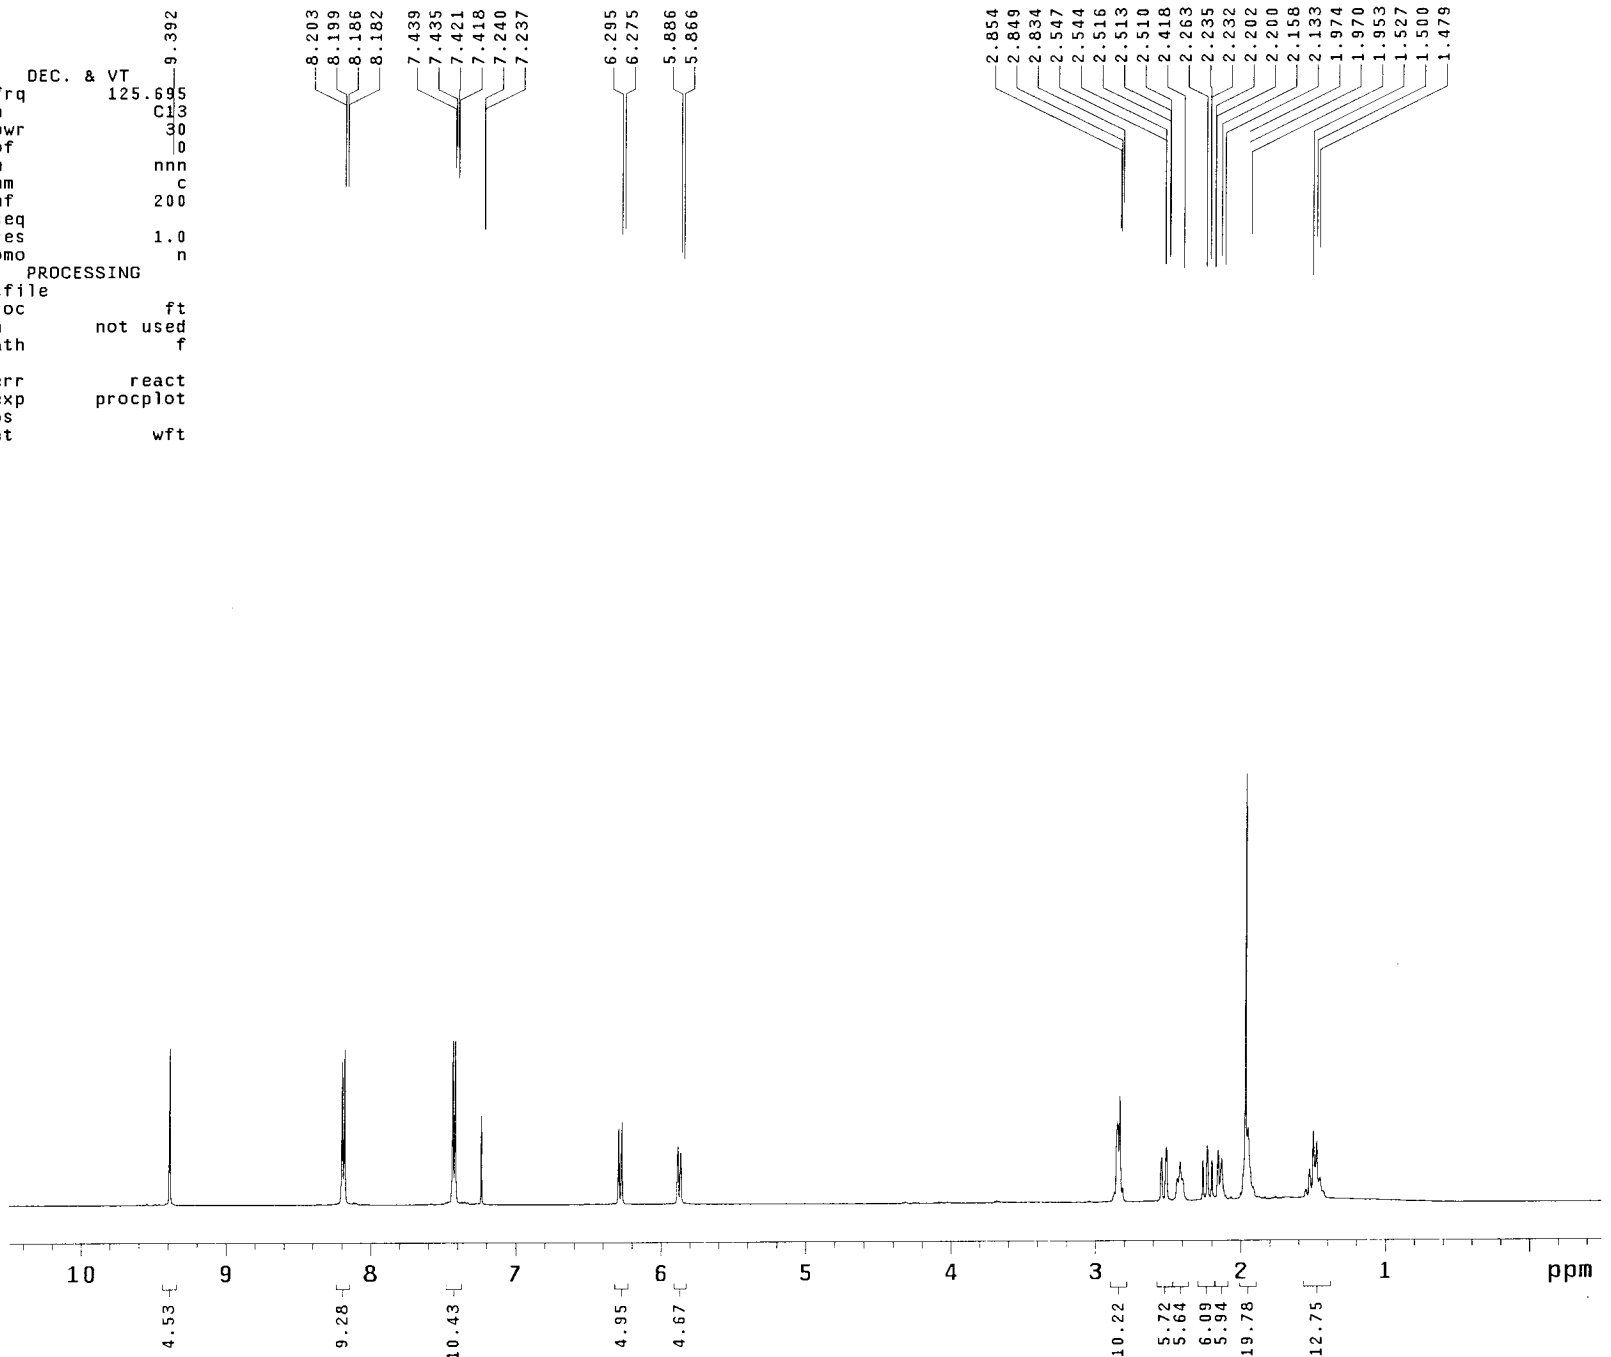

EYN-2-122  
exp39 s2pul

SAMPLE  
date Oct 22 2008 dfrq 499.836  
solvent cdc13 dn H1  
file exp dpwr 39  
ACQUISITION dof 0  
sfrq 125.698 dm yyy  
tn C13 dmm w  
at 1.000 dmf 11905  
np 62894 dseq  
sw 31446.5 dres 1.0  
fb 17000 homo n  
bs 16  
ss 2 lb 1.00  
tpwr 54 wtfile  
pw 4.0 proc ft  
d1 1.000 fn not used  
tof 2512.2 math f  
nt 5000  
ct 5000 werr react  
alock not used y wexp procplot  
gain not used wbs testsn  
wnt

PROCESSING

FLAGS

DISPLAY

il n  
in n  
dp y  
hs nn

sp -1257.2  
wp 27650.1  
vs 55  
sc 0  
wc 210  
hzmm 131.67  
is 500.00  
rfl 1269.7  
rfp 0  
th 2  
ins 100.000  
nm ph

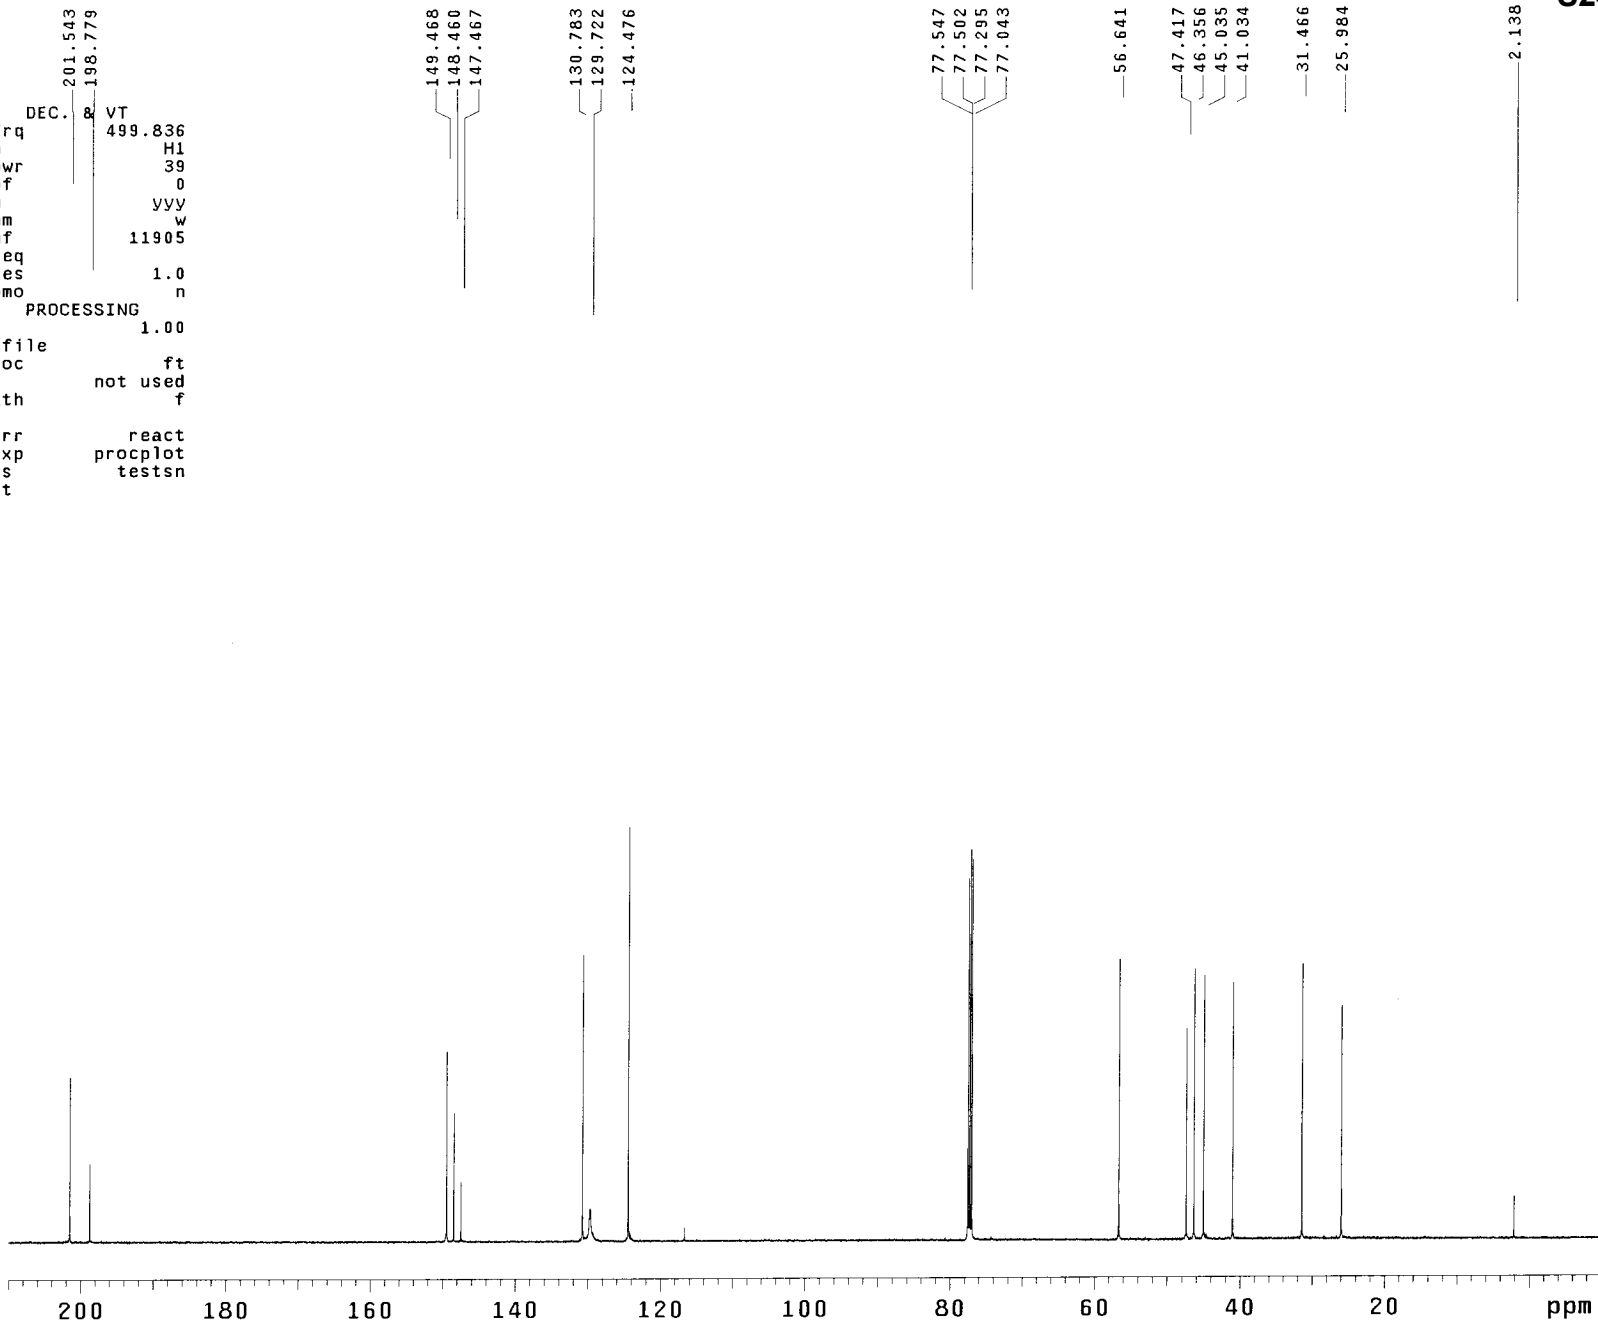Fig S24. <sup>13</sup>C NMR of 5b (125 MHz, CDCl<sub>3</sub>).



Fig S25. DEPT of 5b (CDCl3).

RYN-2-122

exp34 DEPT

|             |             |            |          |       |             |        |
|-------------|-------------|------------|----------|-------|-------------|--------|
| date        | Oct 21 2008 | j1xh       | DEPT     | 140.0 | ACQUISITION | ARRAYS |
| solvent     | cdc13       | mult       | arrayed  |       | array       | mult   |
| sample      | undefined   |            | SPECIAL  |       | arraydim    | 3      |
| ACQUISITION |             | temp       | not used | i     |             | mult   |
| sw          | 31446.5     | gain       | 14       | 1     |             | 0.5    |
| at          | 1.000       | spin       | 0        | 2     |             | 1      |
| np          | 62894       | PROCESSING |          | 3     |             | 1.5    |
| bs          | 16          | lb         | 1.00     |       |             |        |
| ss          | -4          | fn         | not used |       |             |        |
| dl          | 1.000       | SPECTRUM   |          |       |             |        |
| nt          | 3000        | wp         | 27650.1  |       |             |        |
| ct          | 3000        | sp         | -1257.2  |       |             |        |
| TRANSMITTER |             | rp         | 33.6     |       |             |        |
| tn          | C13         | lp         | 45.0     |       |             |        |
| tof         | 2512.2      | ai         | cdc ph   |       |             |        |
| tpwr        | 54          | REFERENCE  |          |       |             |        |
| pw          | 9.400       | rfl        | 1269.7   |       |             |        |
| DECOUPLER   |             | rfp        | 0        |       |             |        |
| dn          | H1          | PLOT       |          |       |             |        |
| dof         | 0           | wc         | 210      |       |             |        |
| dpwr        | 39          | sc         | 0        |       |             |        |
| dm          | nyy         | vs         | 10427    |       |             |        |
| dmm         | ccw         | hzmm       | 131.67   |       |             |        |
| dmf         | 11905       | th         | 5        |       |             |        |
| pp1v1       | 49          |            |          |       |             |        |
| pp          | 29.400      |            |          |       |             |        |

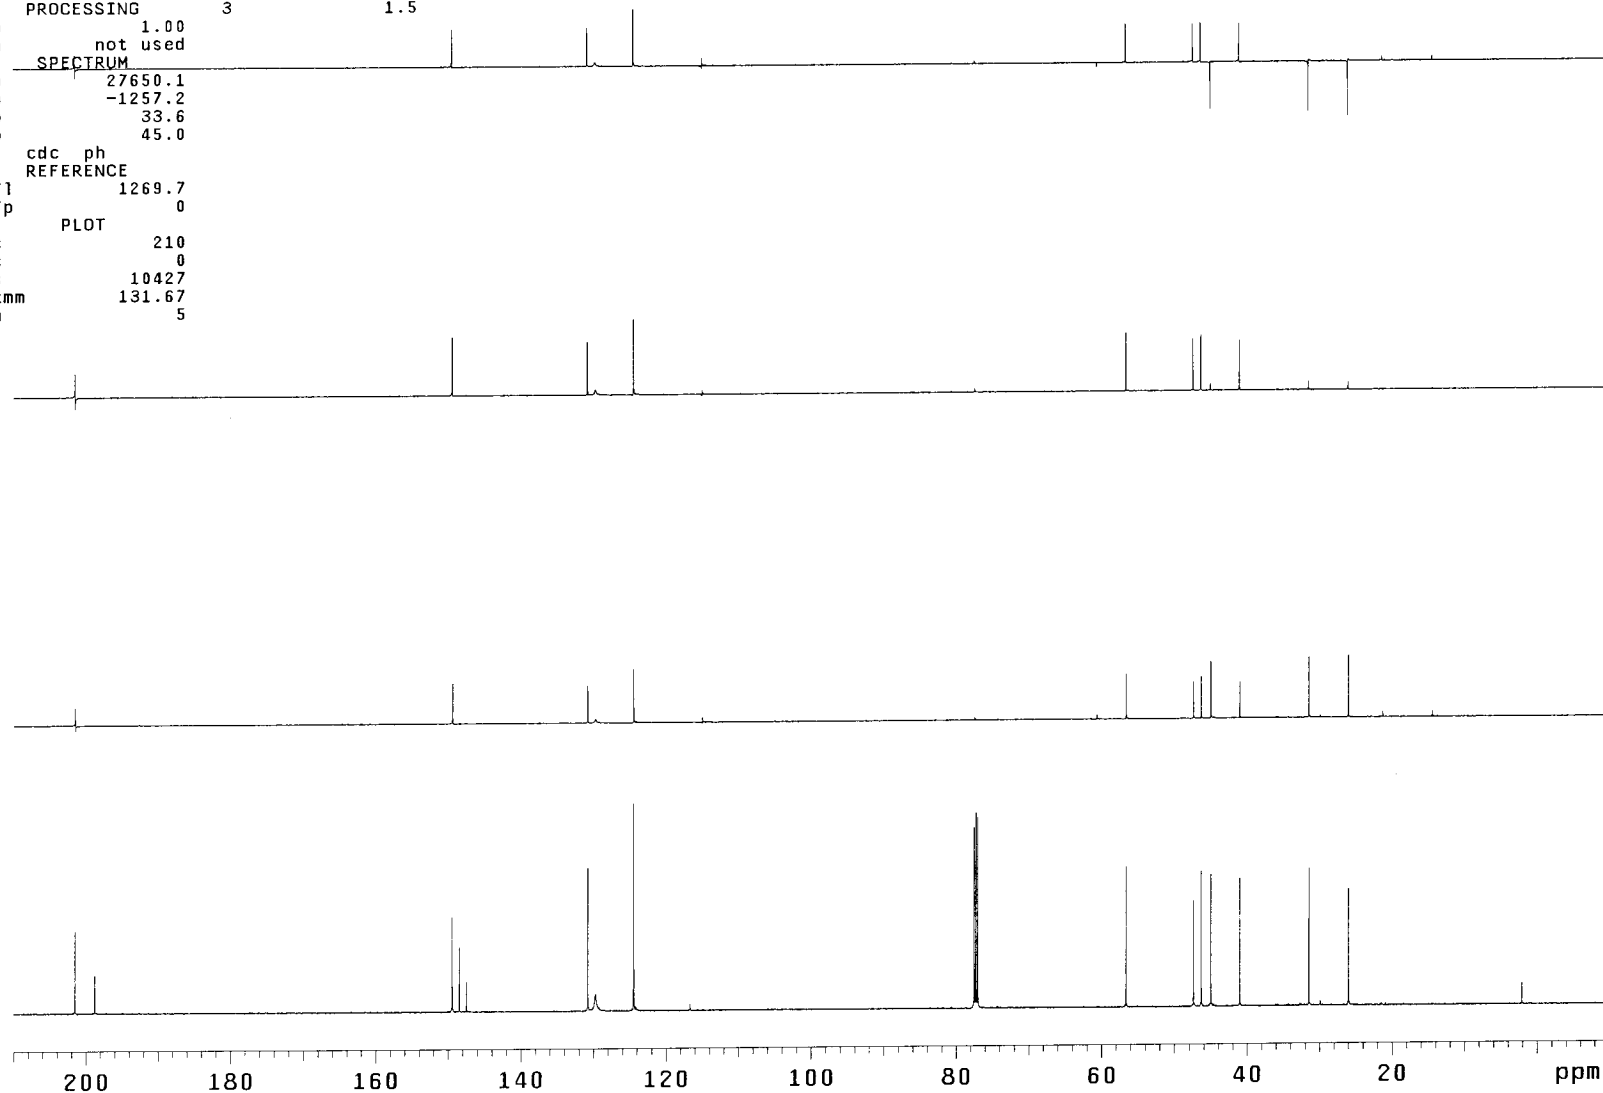

RYN-2-122

exp31 gCOSY

| SAMPLE         |             | FLAGS         |          |
|----------------|-------------|---------------|----------|
| date           | Oct 22 2008 | hs            | nn       |
| solvent        | cdc13       | sspul         | n        |
| sample         | undefined   | hsglv1        | 1026     |
| ACQUISITION    |             | SPECIAL       |          |
| sw             | 4498.4      | temp          | not used |
| at             | 0.228       | gain          | 28       |
| np             | 2048        | spin          | 0        |
| fb             | 3000        | F2 PROCESSING |          |
| ss             | 16          | sb            | -0.114   |
| d1             | 1.000       | sbs           | not used |
| nt             | 16          | fn            | 2048     |
| 2D ACQUISITION |             | F1 PROCESSING |          |
| sw1            | 4498.4      | sb1           | -0.028   |
| ni             | 128         | sbs1          | not used |
| TRANSMITTER    |             | DISPLAY       |          |
| tn             | H1          | fn1           | 2048     |
| sfrq           | 499.836     | sp            | 487.8    |
| tof            | 249.8       | wp            | 4494.0   |
| tpwr           | 57          | wp1           | 504.2    |
| pw             | 13.000      | wp1           | 4494.0   |
| GRADIENTS      |             | rf1           | 2450.6   |
| gzlv1          | 1026        | rfp           | 2934.0   |
| gt1            | 0.001000    | rf11          | -499.8   |
| gstab          | 0.000500    | rfp1          | 0        |
| DECOUPLER      |             | PLOT          |          |
| dn             | C13         | wc            | 155.0    |
| dm             | nnn         | sc            | 10.0     |
|                |             | wc2           | 155.0    |
|                |             | sc2           | 0        |
|                |             | vs            | 227      |
|                |             | th            | 6        |
|                |             | ai            | cdc av   |

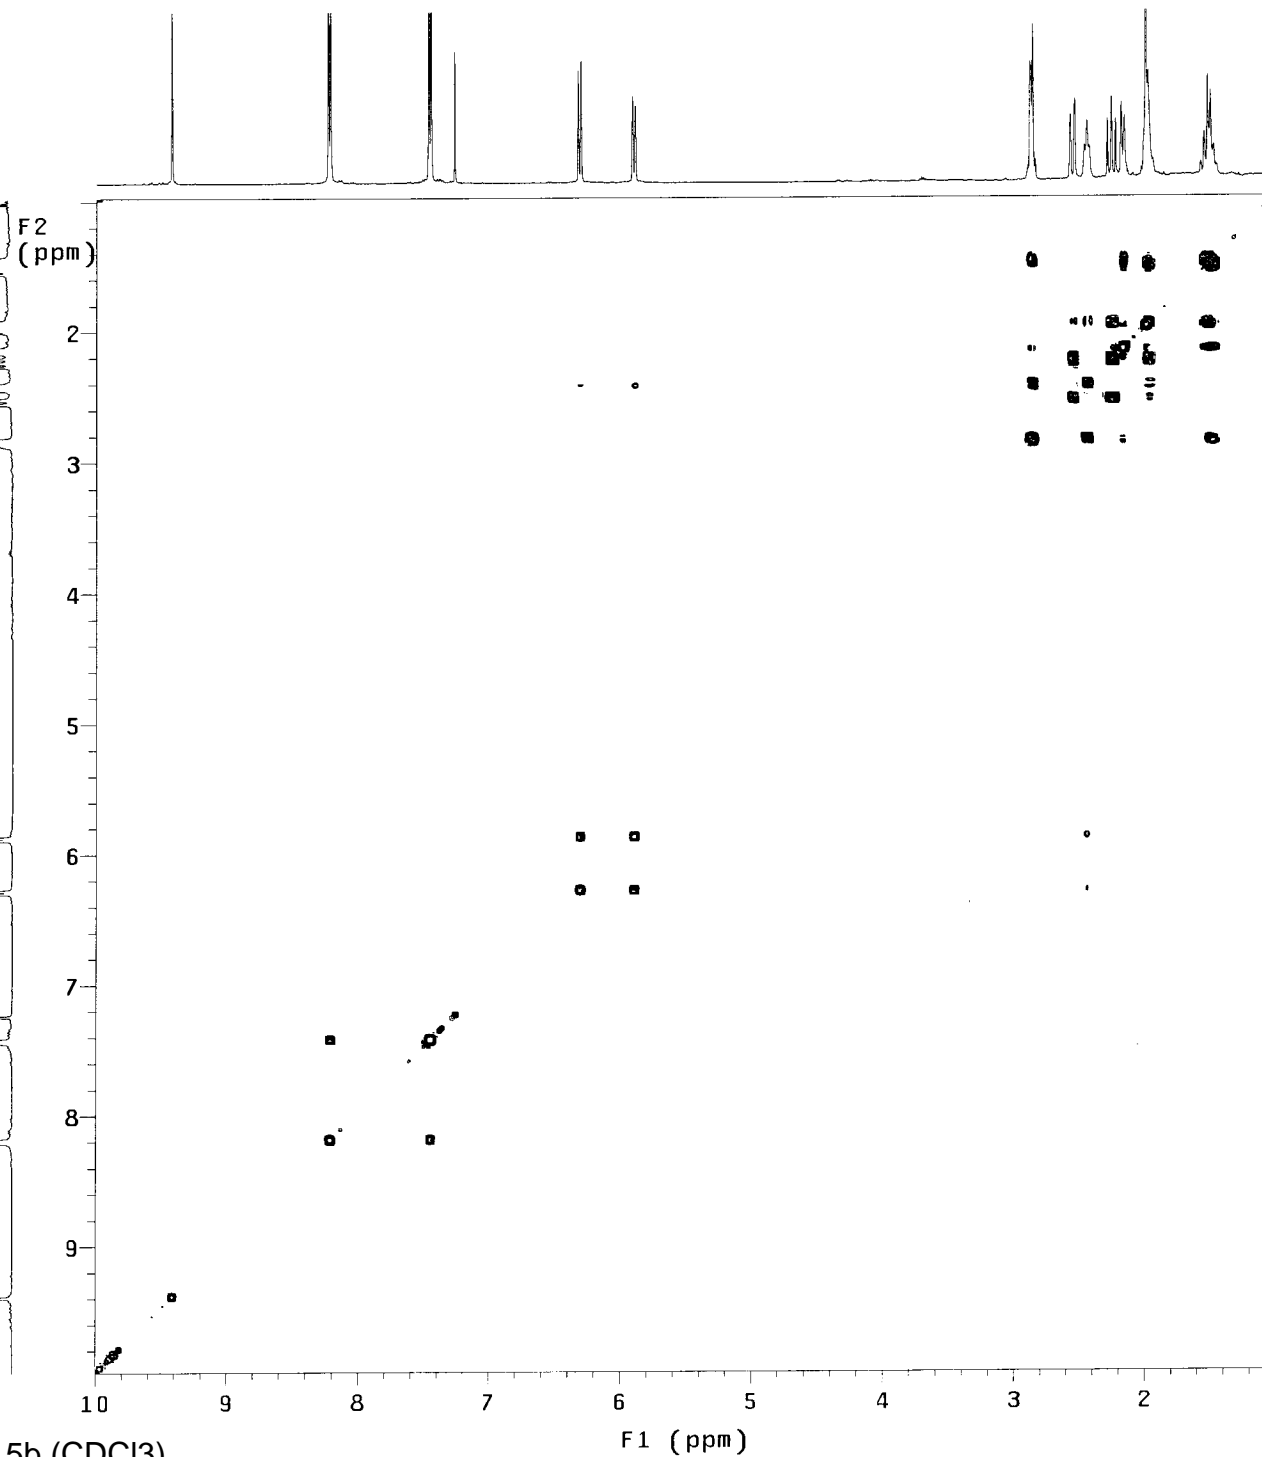Fig S26. COSY of 5b (CDCl<sub>3</sub>).

F1 (ppm)

RYN-2-122

Fig S27. HMQC of 5b (CDCl<sub>3</sub>).

exp32 gHMQC

| SAMPLE         |             | FLAGS         | ACQUISITION | ARRAYS   |
|----------------|-------------|---------------|-------------|----------|
| date           | Oct 22 2008 | hs            | n           | array    |
| solvent        | cdc13       | sspul         | y           | phase    |
| sample         | undefined   | PFGflg        | y           | arraydim |
| ACQUISITION    | hsglv1      | 1026          | 1           | phase    |
| sw             | 4498.4      | SPECIAL       | 1           | 1        |
| at             | 0.228       | temp          | not used    | 2        |
| np             | 2048        | gain          | 28          |          |
| fb             | 3000        | spin          | 0           |          |
| ss             | 32          | GRADIENTS     |             |          |
| d1             | 1.000       | gzlv11        | 1026        |          |
| nt             | 16          | gt1           | 0.001000    |          |
| 2D ACQUISITION | gzlv13      | 516           |             |          |
| sw1            | 28912.2     | gt3           | 0.001000    |          |
| ni             | 128         | gstab         | 0.000500    |          |
| phase          | arrayed     | F2 PROCESSING |             |          |
| TRANSMITTER    | gf          | 0.105         |             |          |
| tn             | H1          | gfs           | not used    |          |
| sfrq           | 499.836     | fn            | 2048        |          |
| tof            | 249.8       | F1 PROCESSING |             |          |
| tpwr           | 57          | gf1           | 0.006       |          |
| pw             | 13.000      | gfs1          | not used    |          |
| DECOUPLER      | proc1       | lp            |             |          |
| dn             | C13         | fn1           | 2048        |          |
| dof            | -2515.1     | DISPLAY       |             |          |
| dm             | nny         | sp            | 903.8       |          |
| dmm            | ccp         | wp            | 3413.4      |          |
| dmf            | 32258       | sp1           | 2490.1      |          |
| dpwr           | 35          | wp1           | 17364.2     |          |
| pxlv1          | 51          | rfl           | 3602.8      |          |
| pxw            | 14.700      | rfp           | 4093.6      |          |
| HMQC           | rfl1        | 20664.8       |             |          |
| j1xh           | 140.0       | rfp1          | 15644.5     |          |
| nullflg        | y           | PLOT          |             |          |
|                | wc          | 150.0         |             |          |
|                | sc          | 6.2           |             |          |
|                | wc2         | 116.2         |             |          |
|                | sc2         | 0             |             |          |
|                | vs          | 227           |             |          |
|                | th          | 4             |             |          |
|                | ai          | cdc           | ph          |          |

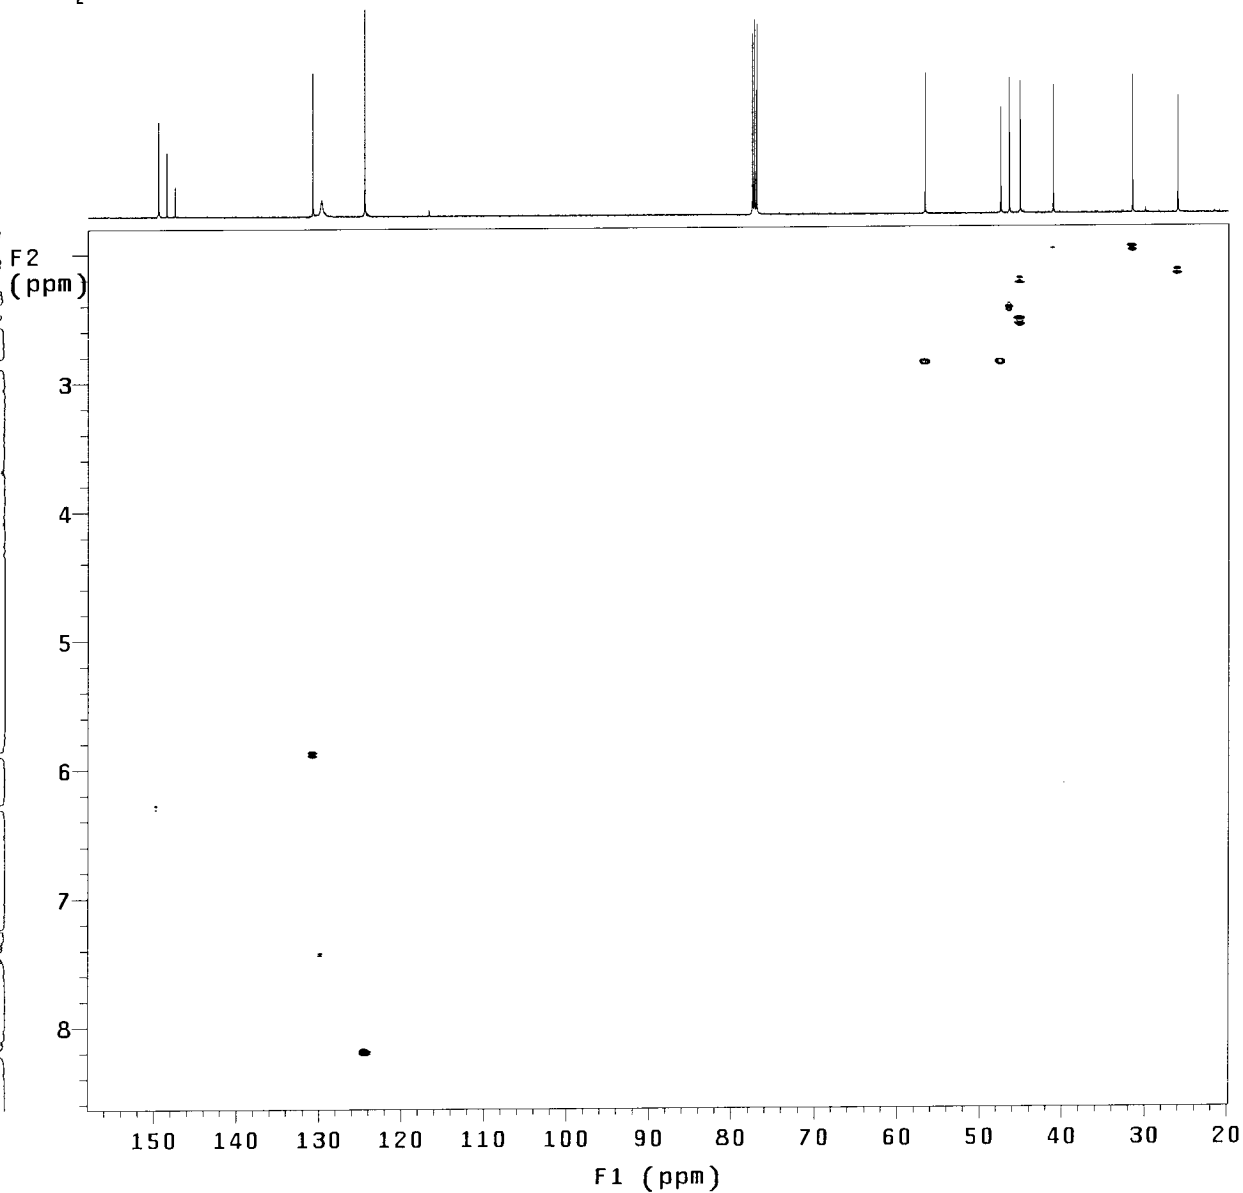

RYN-2-122

exp33 NOESY

| SAMPLE         |             | FLAGS         | n        |
|----------------|-------------|---------------|----------|
| date           | Oct 22 2008 | hs            |          |
| solvent        | cdc13       | sspul         | y        |
| sample         | undefined   | PFGflg        | y        |
| ACQUISITION    |             | hsglv1        | 1026     |
| sw             | 4498.4      | SPECIAL       |          |
| at             | 0.228       | temp          | not used |
| np             | 2048        | gain          | 28       |
| fb             | 3000        | spin          | 0        |
| ss             | 32          | F2 PROCESSING |          |
| dl             | 1.000       | gf            | 0.105    |
| nt             | 8           | gfs           | not used |
| 2D ACQUISITION |             | fn            | 2048     |
| sw1            | 4498.4      | F1 PROCESSING |          |
| ni             | 200         | gf1           | 0.041    |
| TRANSMITTER    |             | gfs1          | not used |
| tn             | H1          | proc1         | 1p       |
| sfrq           | 499.836     | fn1           | 2048     |
| tof            | 249.8       | DISPLAY       |          |
| tpwr           | 57          | sp            | 504.2    |
| pw             | 13.000      | wp            | 4494.0   |
| NOESY          |             | sp1           | 504.2    |
| mix            | 0.600       | wpl           | 4494.0   |
| PRESATURATION  |             | rfl           | -499.8   |
| satmode        | nnnn        | rfp           | 0        |
| satpwr         | 0           | rfl1          | -499.8   |
| satdly         | 0           | rfl1          | 0        |
| satfrq         | 0           | PLOT          |          |
| DECOUPLER      |             | wc            | 155.0    |
| dn             | C13         | sc            | 10.0     |
| dm             | nnn         | wc2           | 155.0    |
|                |             | sc2           | 0        |
|                |             | vs            | 227      |
|                |             | th            | 3        |
|                |             | ai            | ph       |

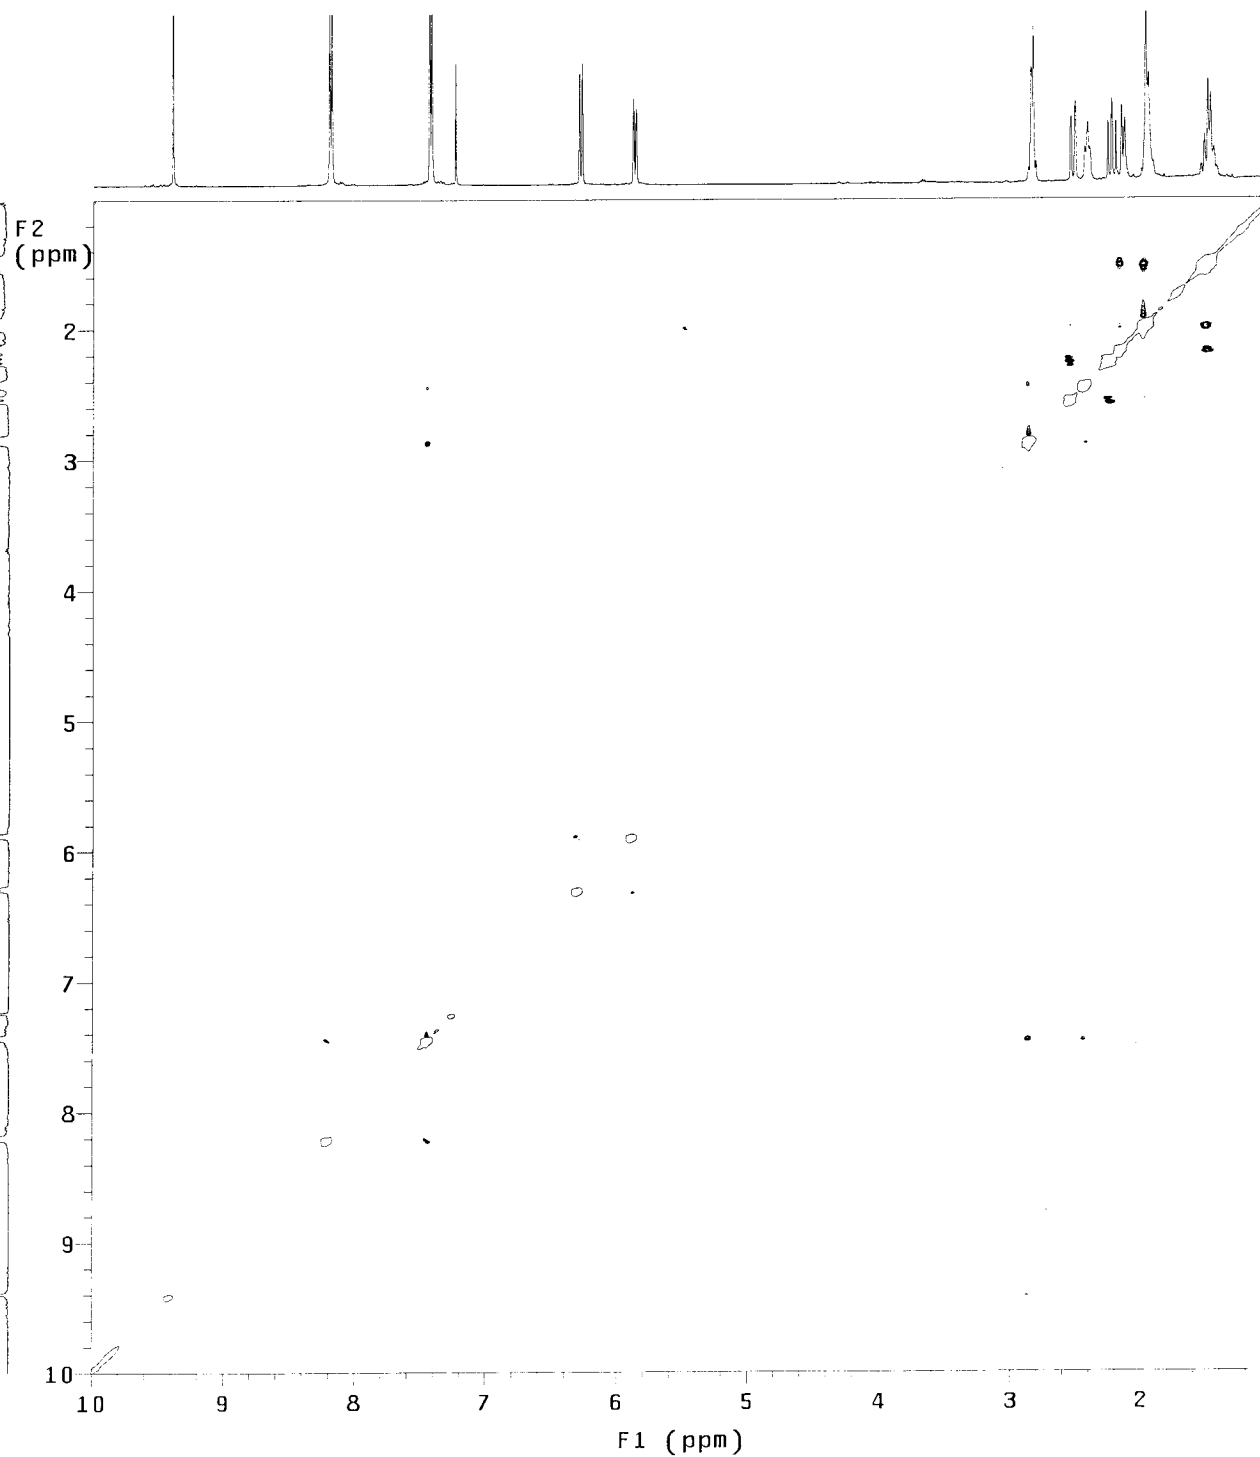Fig S28. NOESY of 5b (CDCl<sub>3</sub>).

F1 (ppm)

Fig S29. <sup>1</sup>H NMR of 5c (500 MHz, CDCl<sub>3</sub>).

RYN-2-127

exp22 s2pu1

|             |             |            |          |
|-------------|-------------|------------|----------|
| SAMPLE      |             | DEC. & VT  |          |
| date        | Oct 30 2008 | dfrq       | 125.695  |
| solvent     | cdcl3       | dn         | C13      |
| file        | exp         | dpwr       | 30       |
| ACQUISITION |             | dof        | 0        |
| sfrq        | 499.836     | dm         | nnn      |
| tn          | H1          | dmm        | c        |
| at          | 3.000       | dmf        | 200      |
| np          | 48000       | dseq       |          |
| sw          | 8000.0      | dres       | 1.0      |
| fb          | 4000        | homo       | n        |
| bs          | 4           | PROCESSING |          |
| tpwr        | 57          | wfile      |          |
| pw          | 4.8         | proc       | ft       |
| d1          | 1.000       | fn         | not used |
| tof         | 499.7       | math       | f        |
| nt          | 4           |            |          |
| ct          | 4           | werr       | react    |
| alock       | not used    | wexp       | procplot |
| gain        | not used    | wbs        |          |
| FLAGS       |             | wnt        | wft      |
| il          | n           |            |          |
| in          | n           |            |          |
| dp          | y           |            |          |
| hs          | nn          |            |          |
| DISPLAY     |             |            |          |
| sp          | -250.1      |            |          |
| wp          | 5498.0      |            |          |
| vs          | 85          |            |          |
| sc          | 0           |            |          |
| wc          | 210         |            |          |
| hzmm        | 26.18       |            |          |
| is          | 147.35      |            |          |
| rfl         | 4632.6      |            |          |
| rfp         | 3618.8      |            |          |
| th          | 4           |            |          |
| ins         | 100.000     |            |          |
| nm          | ph          |            |          |

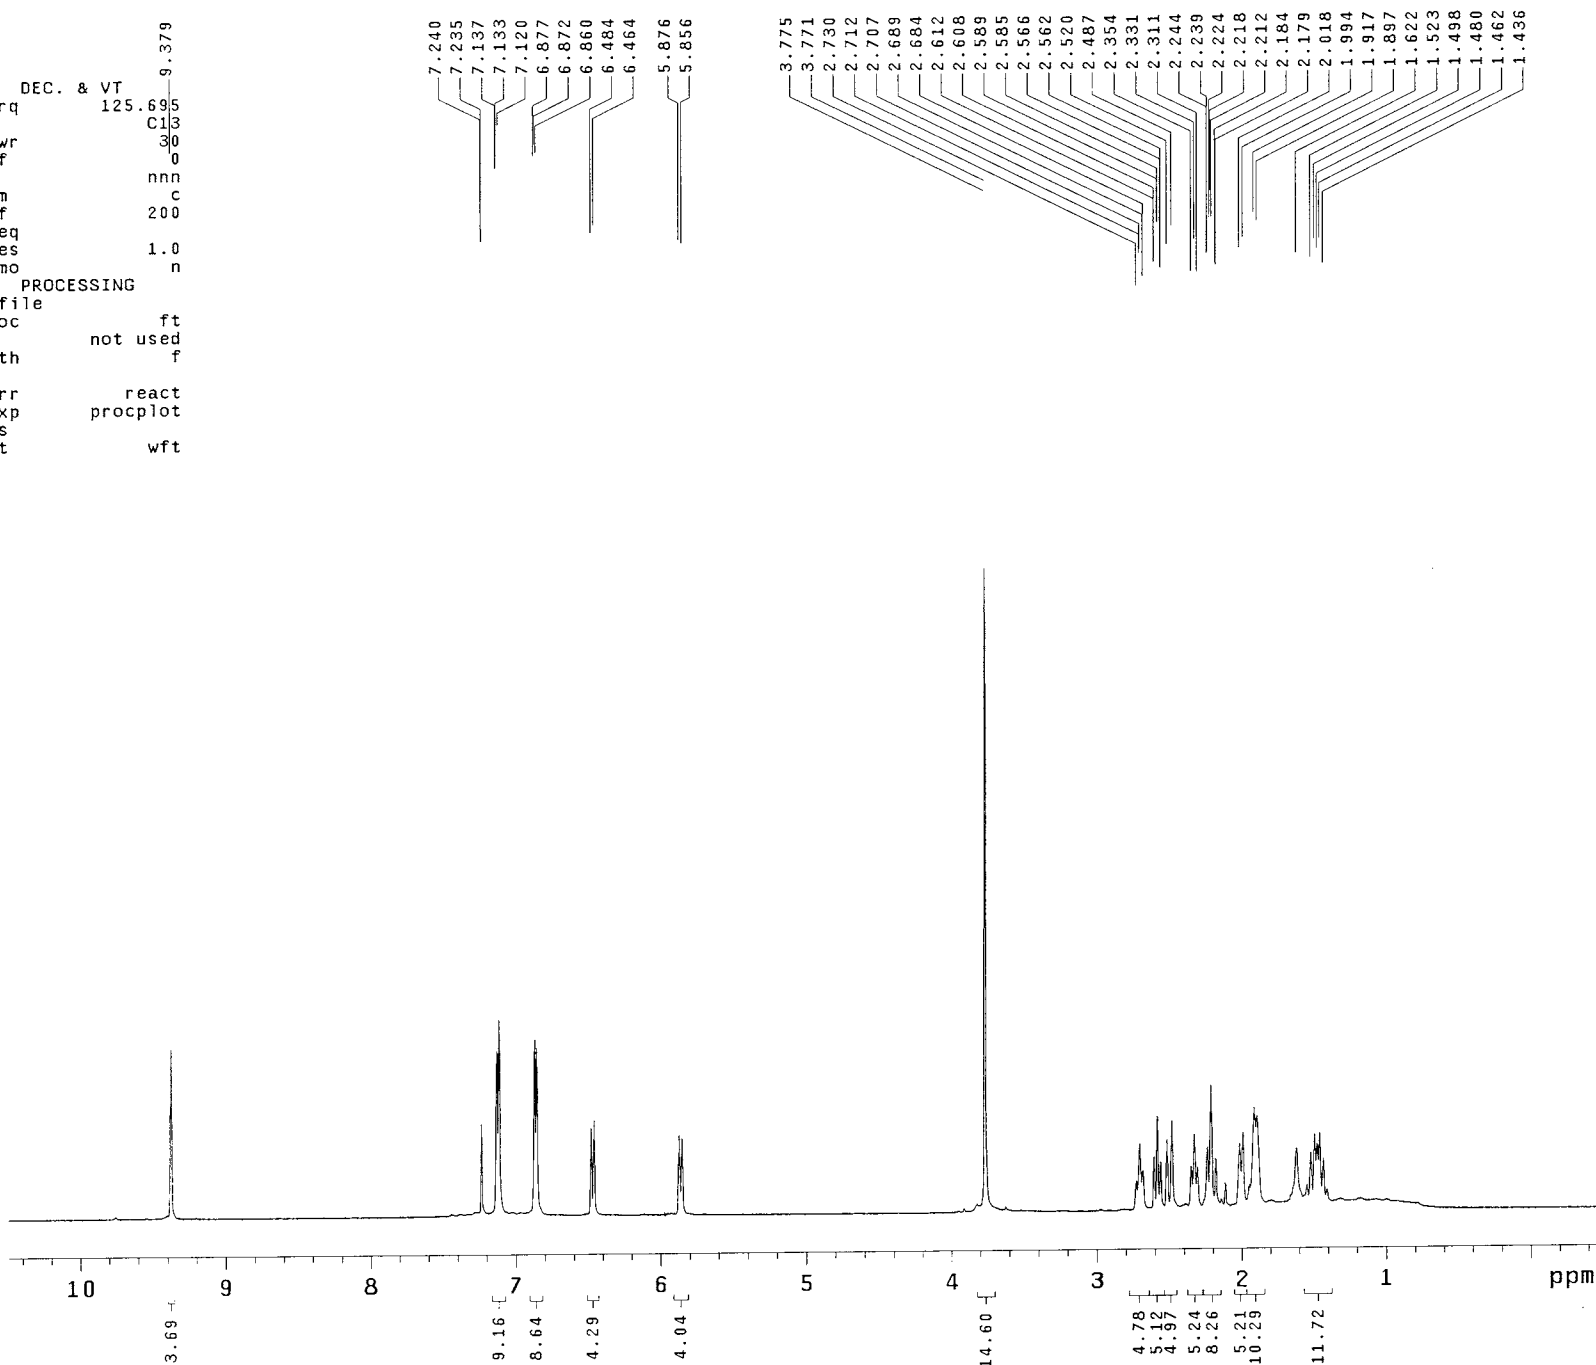

RYN-2-127  
 exp23 s2pu1

SAMPLE  
 date Oct 30 2008  
 solvent cdc13  
 file exp

ACQUISITION  
 sfrq 125.698  
 tn C13  
 at 1.000  
 np 62894  
 sw 31446.5  
 fb 17000  
 bs 16  
 ss 2  
 tpwr 54  
 pw 4.0  
 d1 1.000  
 tof 2512.2  
 nt 20000  
 ct 20000  
 alock y  
 gain not used

DEC. & VT  
 203.271  
 199.247

PROCESSING  
 lb 1.00

wtfile  
 proc ft  
 fn not used  
 math f

werr react  
 wexp procplot  
 wbs testsn  
 wnt

FLAGS  
 il n  
 in n  
 dp y  
 hs nn

DISPLAY  
 sp -1256.9  
 wp 27650.1  
 vs 92  
 sc 0  
 wc 210  
 hzmm 131.67  
 is 500.00  
 rfl 10980.6  
 rfp 9677.6  
 th 3  
 ins 100.000  
 nm cdc ph

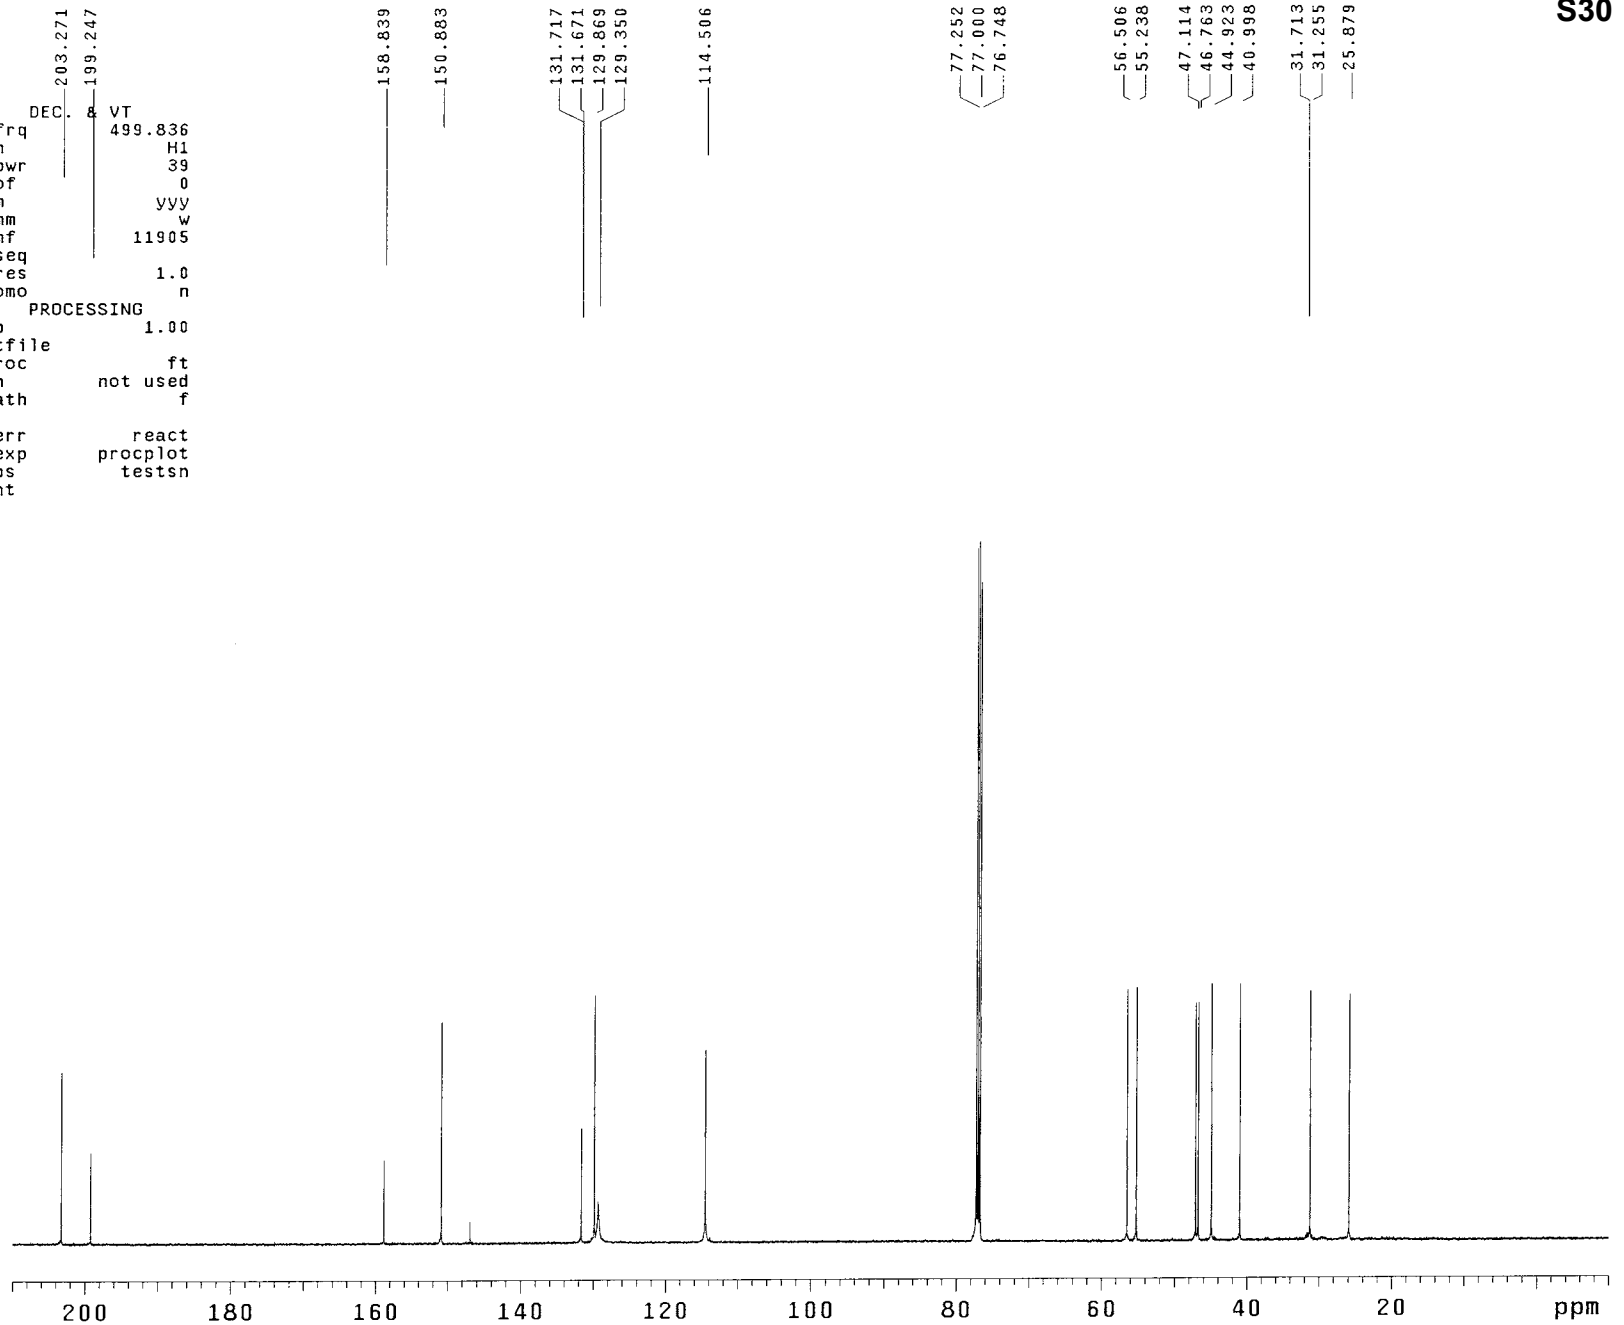Fig S30. <sup>13</sup>C NMR of 5c (125 MHz, CDCl<sub>3</sub>).

Fig S31. DEPT of 5c (CDCl<sub>3</sub>).

RYN-2-127

exp24 DEPT

|             |             |            |             |        |
|-------------|-------------|------------|-------------|--------|
| SAMPLE      |             | DEPT       | ACQUISITION | ARRAYS |
| date        | Oct 31 2008 | j1xh       | 140.0       | array  |
| solvent     | cdcl3       | mult       | arrayed     | mult   |
| sample      | undefined   | SPECIAL    | arraydim    | 3      |
| ACQUISITION |             | temp       | not used    | i      |
| sw          | 31446.5     | gain       | 28          | mult   |
| at          | 1.000       | spin       | 0           | 1      |
| np          | 62894       | PROCESSING | 3           | 1.5    |
| bs          | 16          | lb         | 1.00        |        |
| ss          | -4          | fn         | not used    |        |
| d1          | 1.000       | SPECTRUM   |             |        |
| nt          | 1500        | wp         | 27650.1     |        |
| ct          | 1500        | sp         | -1257.2     |        |
| TRANSMITTER |             | rp         | 32.3        |        |
| tn          | C13         | lp         | 53.3        |        |
| tof         | 2512.2      | ai         | cdc ph      |        |
| tpwr        | 54          | REFERENCE  |             |        |
| pw          | 9.400       | rfl        | 1269.7      |        |
| DECOUPLER   |             | rffp       | 0           |        |
| dn          | H1          | PLOT       |             |        |
| dof         | 0           | wc         | 210         |        |
| dpwr        | 39          | sc         | 0           |        |
| dm          | nny         | vs         | 229         |        |
| dmm         | ccw         | hzmm       | 131.67      |        |
| dmf         | 11905       | th         | 68          |        |
| pp1v1       | 49          |            |             |        |
| pp          | 29.400      |            |             |        |

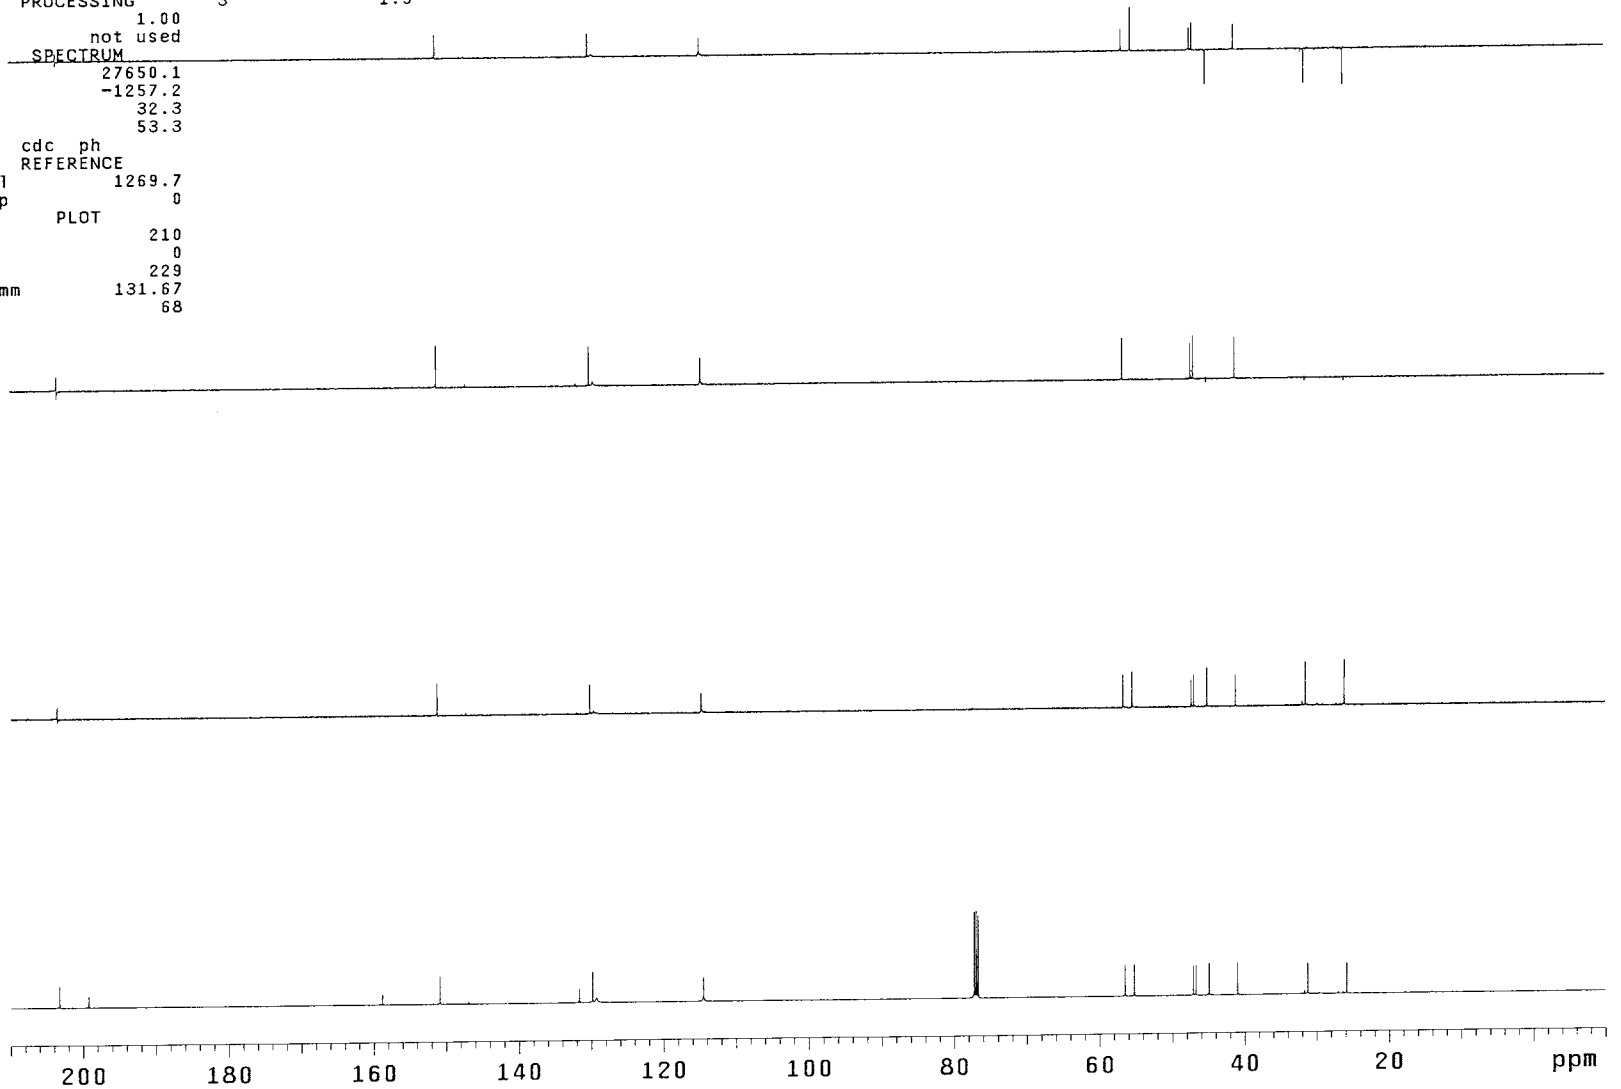

Fig S32. COSY of 5c (CDCl<sub>3</sub>).

RYN--2-127

exp14 gCOSY

|                |            |               |          |
|----------------|------------|---------------|----------|
| date           | Nov 5 2008 | hs            | nn       |
| solvent        | cdcl3      | sspul         | n        |
| sample         | undefined  | hsglv1        | 1026     |
| ACQUISITION    |            | SPECIAL       |          |
| sw             | 4498.4     | temp          | not used |
| at             | 0.228      | gain          | 28       |
| np             | 2048       | spin          | 0        |
| fb             | 3000       | F2 PROCESSING |          |
| ss             | 16         | sb            | -0.114   |
| d1             | 1.000      | sbs           | not used |
| nt             | 32         | fn            | 2048     |
| 2D ACQUISITION |            | F1 PROCESSING |          |
| sw1            | 4498.4     | sb1           | -0.028   |
| ni             | 128        | sbs1          | not used |
| TRANSMITTER    |            | proci         | lp       |
| tn             | H1         | fn1           | 2048     |
| sfrq           | 499.836    | DISPLAY       |          |
| tof            | 249.8      | sp            | 489.0    |
| tpwr           | 57         | wp            | 4494.0   |
| pw             | 13.000     | sp1           | 488.3    |
| GRADIENTS      |            | wpl           | 4494.0   |
| gzlv11         | 1026       | rfl           | 2444.4   |
| gt1            | 0.001000   | rfp           | 2929.0   |
| gstab          | 0.000500   | rfl1          | 2445.1   |
| DECOUPLER      |            | rfp1          | 2929.0   |
| dn             | C13        | PLOT          |          |
| dm             | nnn        | wc            | 155.0    |
|                |            | sc            | 10.0     |
|                |            | wc2           | 155.0    |
|                |            | sc2           | 0        |
|                |            | vs            | 227      |
|                |            | th            | 4        |
|                |            | ai            | cdc av   |

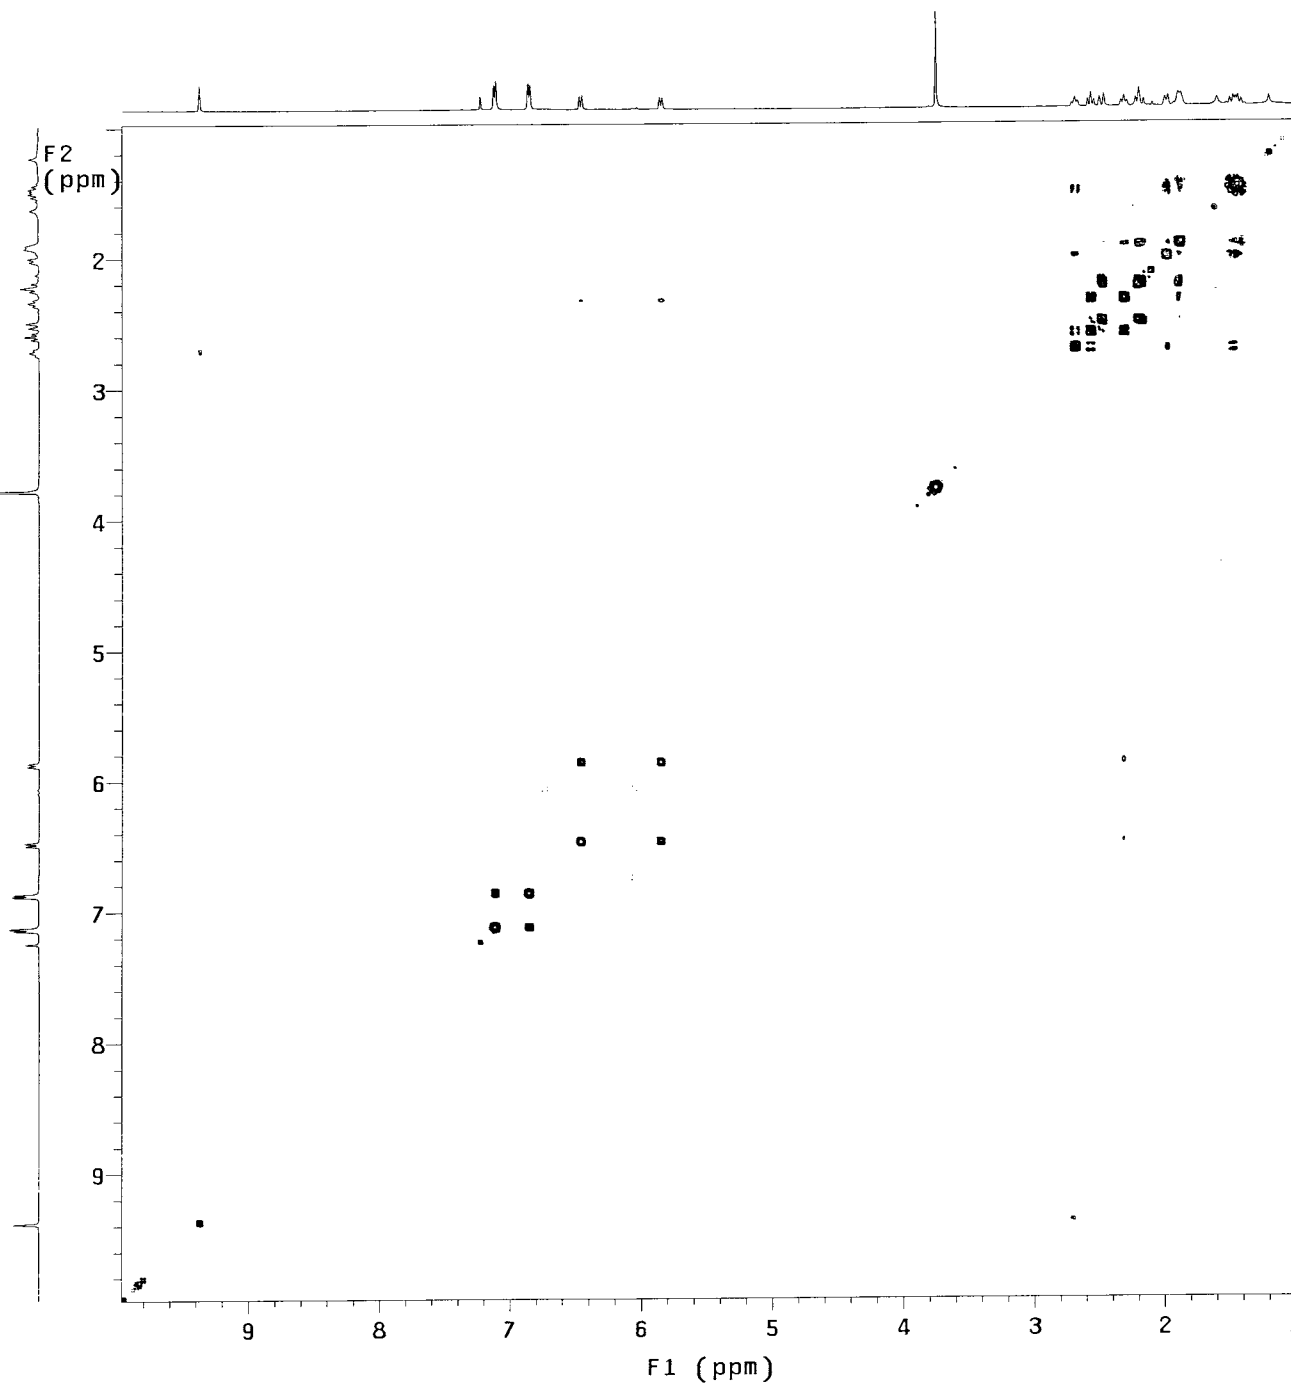



RYN-127

exp15 gHMQC

Fig S33. HMQC of 5c (CDCl<sub>3</sub>).

| SAMPLE         |            | FLAGS         | ACQUISITION | ARRAYS |
|----------------|------------|---------------|-------------|--------|
| date           | Nov 5 2008 | hs            | n           | phase  |
| solvent        | cdcl3      | sspul         | y           | 256    |
| sample         | undefined  | PFGflg        | y           |        |
| ACQUISITION    | hsglv1     | 1026          | i           | phase  |
| sw             | 4498.4     | SPECIAL       | 1           | 1      |
| at             | 0.228      | temp          | not used    | 2      |
| np             | 2048       | gain          | 28          |        |
| fb             | 3000       | spin          | 0           |        |
| ss             | 32         | GRADIENTS     |             |        |
| d1             | 1.000      | gzlv11        | 1026        |        |
| nt             | 16         | gt1           | 0.001000    |        |
| 2D ACQUISITION | gzlv13     | 516           |             |        |
| sw1            | 21367.5    | gt3           | 0.001000    |        |
| ni             | 128        | gstab         | 0.000500    |        |
| phase          | arrayed    | F2 PROCESSING |             |        |
| TRANSMITTER    | gf         | 0.105         |             |        |
| tn             | H1         | gfs           | not used    |        |
| sfrq           | 499.836    | fn            | 2048        |        |
| tof            | 249.8      | F1 PROCESSING |             |        |
| tpwr           | 57         | gf1           | 0.006       |        |
| pw             | 13.000     | gfs1          | not used    |        |
| DECOUPLER      | proc1      | lp            |             |        |
| dn             | C13        | fn1           | 2048        |        |
| dof            | -2515.1    | DISPLAY       |             |        |
| dm             | nny        | sp            | 546.5       |        |
| dmm            | ccp        | wp            | 3505.6      |        |
| dmf            | 32258      | sp1           | 2601.1      |        |
| dpwr           | 35         | wp1           | 16943.8     |        |
| px1v1          | 51         | rfl           | 2753.3      |        |
| px             | 14.700     | rfp           | 3233.9      |        |
| HMQC           | rfl1       | 20264.4       |             |        |
| j1xh           | 140.0      | rfp1          | 18963.5     |        |
| nullflg        | y          | PLOT          |             |        |
|                | wc         | 150.0         |             |        |
|                | sc         | 6.2           |             |        |
|                | wc2        | 116.2         |             |        |
|                | sc2        | 0             |             |        |
|                | vs         | 1814          |             |        |
|                | th         | 4             |             |        |
|                | aj         | cdc ph        |             |        |

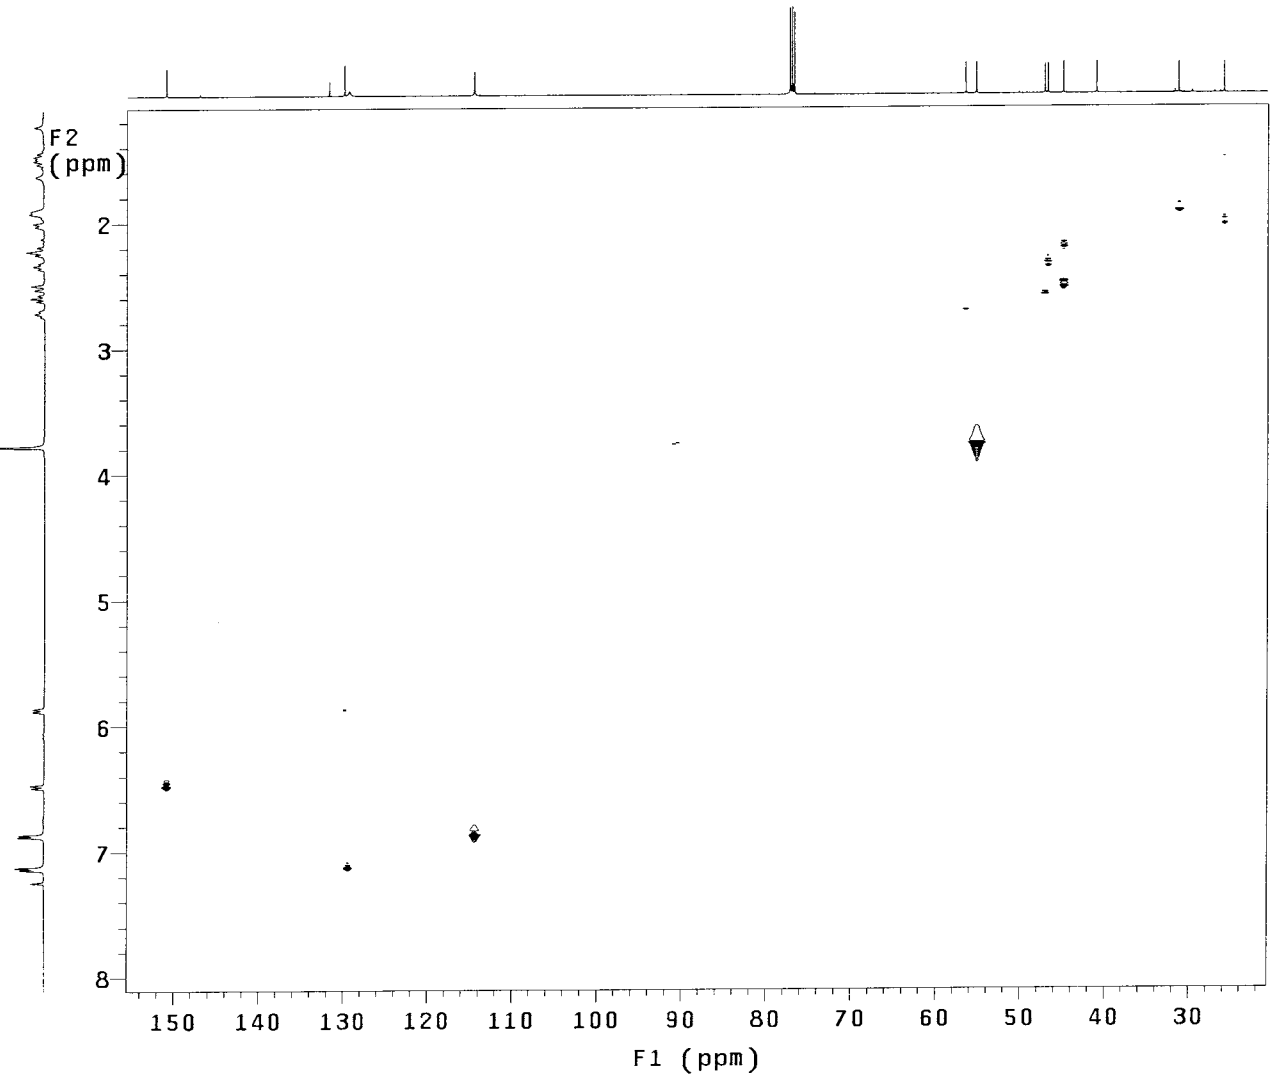

Fig S34. NOESY of 5c (CDCl3).

RYN-127

exp16 NOESY

| SAMPLE         |            | FLAGS         |          |
|----------------|------------|---------------|----------|
| date           | Nov 5 2008 | hs            | n        |
| solvent        | cdc13      | sspul         | y        |
| sample         | undefined  | PFgf1g        | y        |
| ACQUISITION    |            | hsglv1        | 1026     |
| sw             | 4498.4     | SPECIAL       |          |
| at             | 0.228      | temp          | not used |
| np             | 2048       | gain          | 28       |
| fb             | 3000       | spin          | 0        |
| ss             | 32         | F2 PROCESSING |          |
| d1             | 1.000      | gf            | 0.105    |
| nt             | 8          | gfs           | not used |
| 2D ACQUISITION |            | fn            | 2048     |
| sw1            | 4498.4     | F1 PROCESSING |          |
| ni             | 200        | gf1           | 0.041    |
| TRANSMITTER    |            | gfs1          | not used |
| tn             | H1         | proci         | lp       |
| sfrq           | 499.836    | fni           | 2048     |
| tof            | 249.8      | DISPLAY       |          |
| tpwr           | 57         | sp            | 487.7    |
| pw             | 13.000     | wp            | 4494.0   |
| NOESY          |            | sp1           | 488.1    |
| mix            | 0.600      | wp1           | 4494.0   |
| PRESATURATION  |            | rfl           | 2445.7   |
| satmode        | nnnn       | rfp           | 2929.0   |
| satpwr         | 0          | rfl1          | 2445.3   |
| satdly         | 0          | rfp1          | 2929.0   |
| satfrq         | 0          | PLOT          |          |
| DECOUPLER      |            | wc            | 155.0    |
| dn             | C13        | sc            | 10.0     |
| dm             | nnn        | wc2           | 155.0    |
|                |            | sc2           | 0        |
|                |            | vs            | 1814     |
|                |            | th            | 2        |
|                |            | ai            |          |
|                |            | ph            |          |

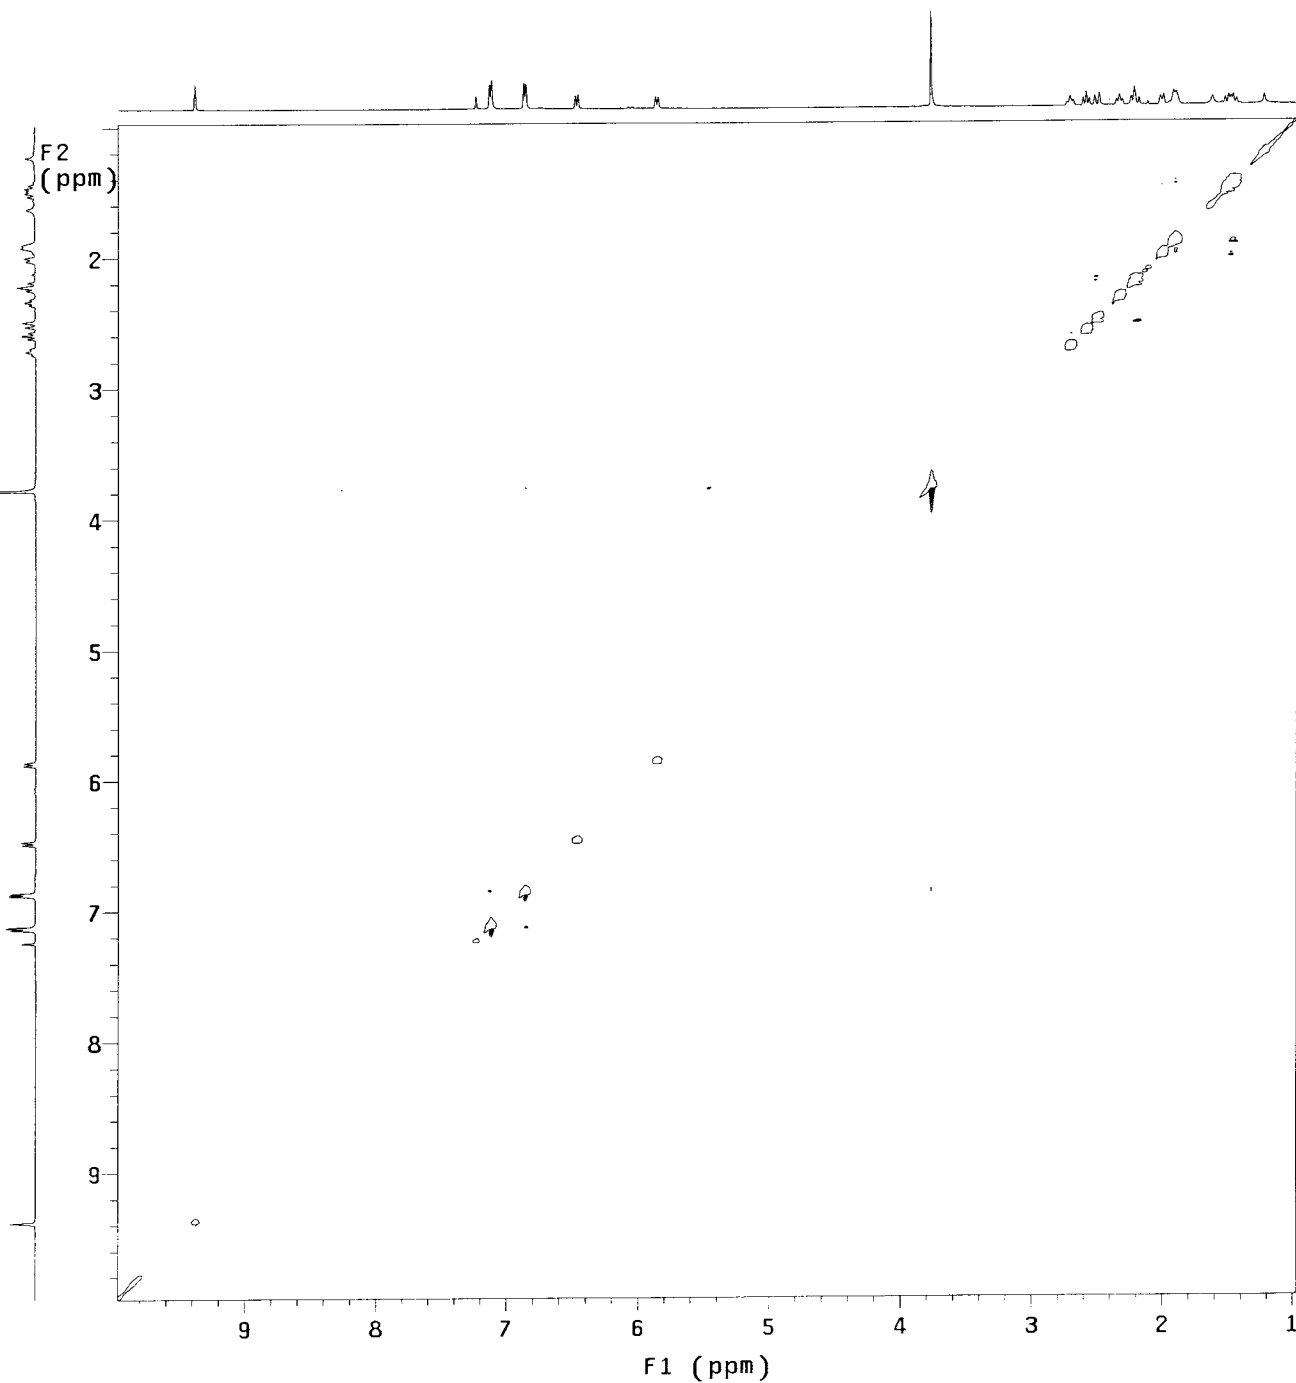

Fig S35. <sup>1</sup>H NMR of 5d (500 MHz, CDCl<sub>3</sub>).

S35

```

RYN-2-129
exp29 s2pu1
SAMPLE
date Nov 2 2008 dfrq 125.695
solvent cdc13 dn C13
file exp dpwr 30
ACQUISITION dof 0
sfrq 499.836 dm nnn
tn H1 dmm c
at 3.000 dmf 200
np 48000 dseq
sw 8000.0 dres 1.0
fb 4000 homo n
bs 4
PROCESSING
tpwr 57 wtfile
pw 4.8 proc ft
d1 1.000 fn not used
tof 499.7 math f
nt 4
ct 4 werr react
alock y wexp procplot
gain not used wbs
FLAGS wnt wft
il n
in n
dp y
hs nn
DISPLAY
sp -250.1
wp 5498.0
vs 32
sc 0
wc 210
hzmm 26.18
is 216.79
rfl 4632.8
rfp 3618.8
th 4
ins 100.000
nm ph
    
```

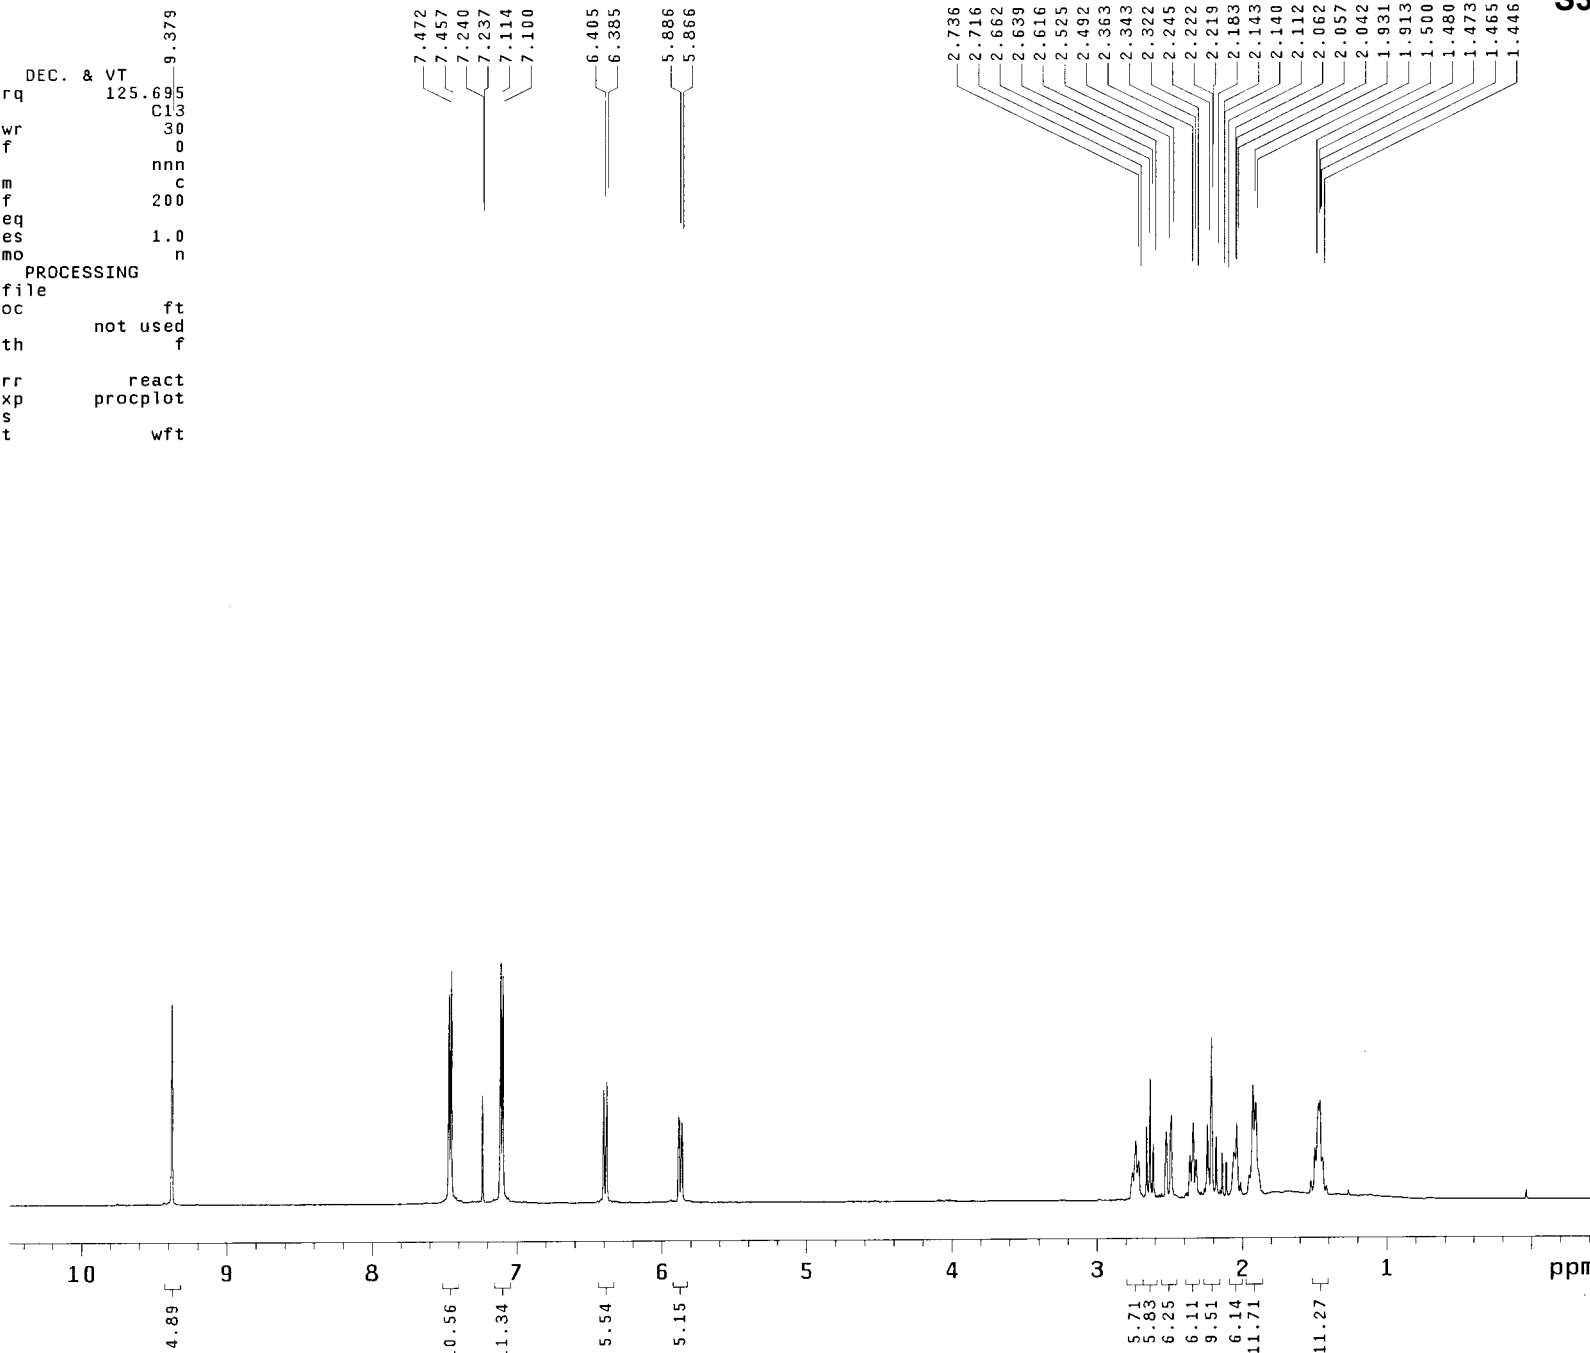

RYN-2-129

exp30 s2pu1

```
SAMPLE
date Nov 2 2008 dfrq 499.836
solvent cdcl3 dn H1
file exp dpwr 39
ACQUISITION dof 0
sfrq 125.698 dm yvy
tn C13 dmm w
at 1.000 dmf 11905
np 62894 dseq
sw 31446.5 dres 1.0
fb 17000 homo n
bs 16 PROCESSING
ss 2 lb 1.00
tpwr 54 wtfile
pw 4.0 proc ft
d1 1.000 fn not used
tof 2512.2 math f
nt 20000
ct 6336 werr react
alock y wexp procplot
gain not used wbs testsn
FLAGS wnt

il n
in n
dp y
hs nn

DISPLAY
sp -1256.9
wp 27650.1
vs 50
sc 0
wc 210
hzmm 131.67
is 500.00
rfl 10982.5
rfp 9677.6
th 2
ins 100.000
nm ph
```

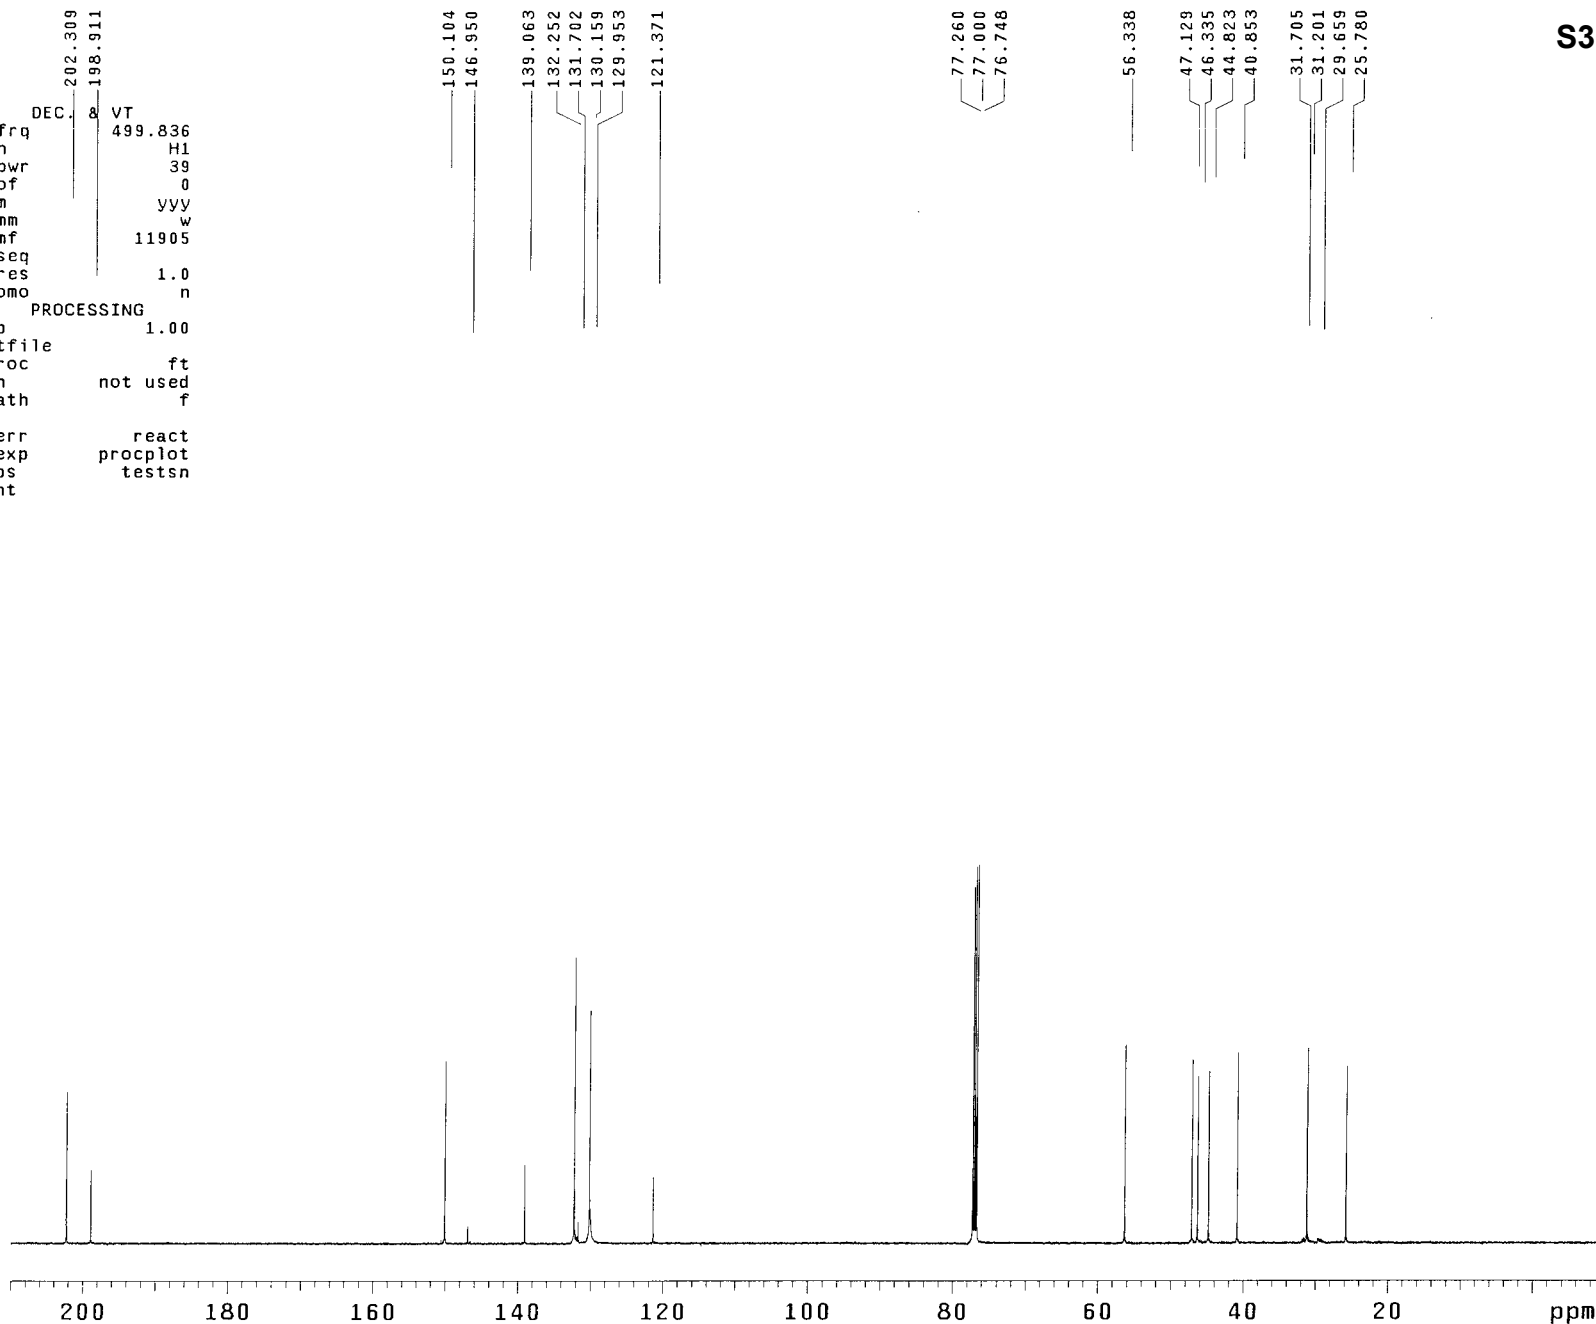

S36

Fig S36. <sup>13</sup>C NMR of 5d (125 MHz, CDCl<sub>3</sub>).

Fig S37. DEPT of 5d (CDCl<sub>3</sub>).

RYN-2-129

exp31 DEPT

|             |            |            |          |          |      |
|-------------|------------|------------|----------|----------|------|
| date        | Nov 2 2008 | j1xh       | 140.0    | array    | mult |
| solvent     | cdcl3      | mult       | arrayed  | arraydim | 3    |
| sample      | undefined  | SPECIAL    |          |          |      |
| ACQUISITION |            | temp       | not used | i        | mult |
| sw          | 31446.5    | gain       | 20       | 1        | 0.5  |
| at          | 1.000      | spin       | 0        | 2        | 1    |
| np          | 62894      | PROCESSING |          | 3        | 1.5  |
| bs          | 16         | lb         | 1.00     |          |      |
| ss          | -4         | fn         | not used |          |      |
| d1          | 1.000      | SPECTRUM   |          |          |      |
| nt          | 2000       | wp         | 27650.1  |          |      |
| ct          | 2000       | sp         | -1257.2  |          |      |
| TRANSMITTER |            | rp         | 39.5     |          |      |
| tn          | C13        | lp         | 33.7     |          |      |
| tof         | 2512.2     | ai         | cdc ph   |          |      |
| tpwr        | 54         | REFERENCE  |          |          |      |
| pw          | 9.400      | rfl        | 1269.7   |          |      |
| DECOUPLER   |            | rfp        | 0        |          |      |
| dn          | H1         | PLOT       |          |          |      |
| dof         | 0          | wc         | 210      |          |      |
| dpwr        | 39         | sc         | 0        |          |      |
| dm          | nny        | vs         | 370      |          |      |
| dmm         | ccw        | hzmm       | 131.67   |          |      |
| dmf         | 11905      | th         | 68       |          |      |
| pp1v1       | 49         |            |          |          |      |
| pp          | 29.400     |            |          |          |      |

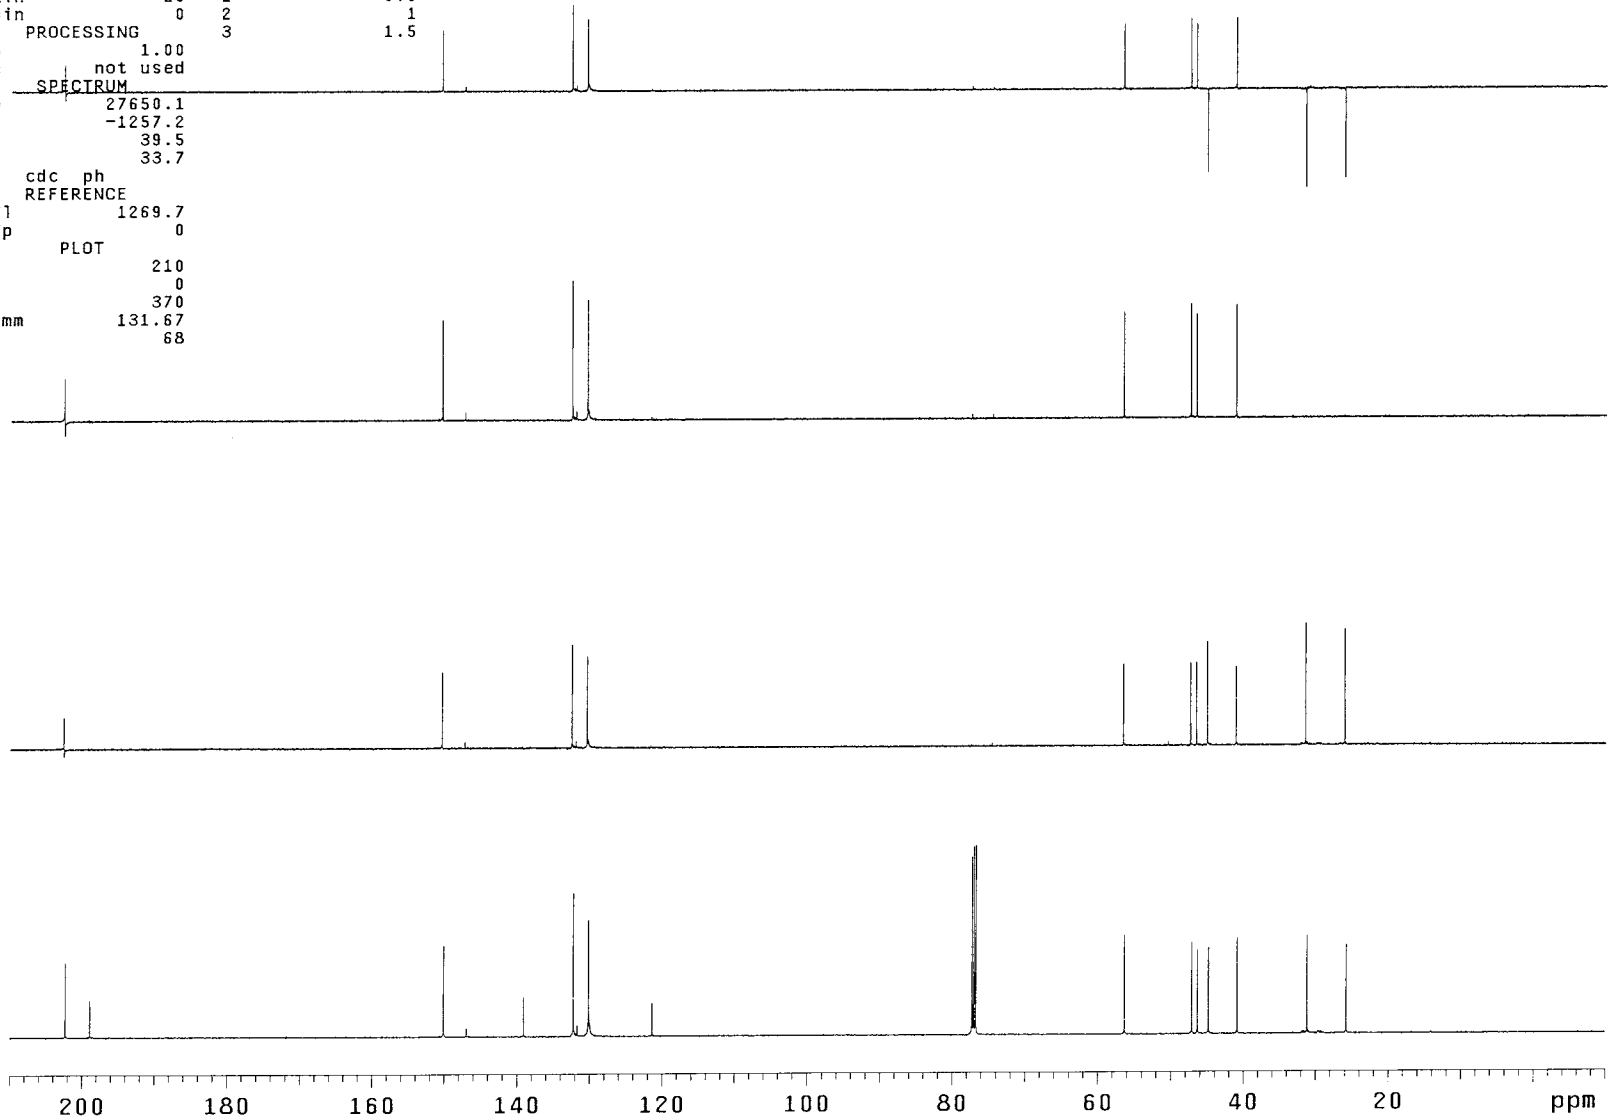

Fig S38. COSY of 5d (CDCl3).

S38

RYN-2-129

exp32 gCOSY

| SAMPLE         |            | FLAGS         |          |
|----------------|------------|---------------|----------|
| date           | Nov 2 2008 | hs            | nn       |
| solvent        | cdcl3      | sspul         | n        |
| sample         | undefined  | hsglv1        | 1026     |
| ACQUISITION    |            | SPECIAL       |          |
| sw             | 4498.4     | temp          | not used |
| at             | 0.228      | gain          | 20       |
| np             | 2048       | spin          | 0        |
| fb             | 3000       | F2 PROCESSING |          |
| ss             | 16         | sb            | -0.114   |
| d1             | 1.000      | sbs           | not used |
| nt             | 32         | fn            | 2048     |
| 2D ACQUISITION |            | F1 PROCESSING |          |
| sw1            | 4498.4     | sb1           | -0.028   |
| ni             | 128        | sbs1          | not used |
| TRANSMITTER    |            | proc1         |          |
| tn             | H1         | fn1           | 2048     |
| sfrq           | 499.836    | DISPLAY       |          |
| tof            | 249.8      | sp            | 485.0    |
| tpwr           | 57         | wp            | 4494.0   |
| pw             | 13.000     | sp1           | 487.5    |
| GRADIENTS      |            | wp1           | 4494.0   |
| gzlv11         | 1026       | rfl           | 2453.4   |
| gti            | 0.001000   | rfp           | 2934.0   |
| gstab          | 0.000500   | rfl1          | 2450.9   |
| DECOUPLER      |            | rfp1          | 2934.0   |
| dn             | C13        | PLOT          |          |
| dm             | nnn        | wc            | 155.0    |
|                |            | sc            | 10.0     |
|                |            | wc2           | 155.0    |
|                |            | sc2           | 0        |
|                |            | vs            | 28       |
|                |            | th            | 6        |
|                |            | ai            | cdc av   |

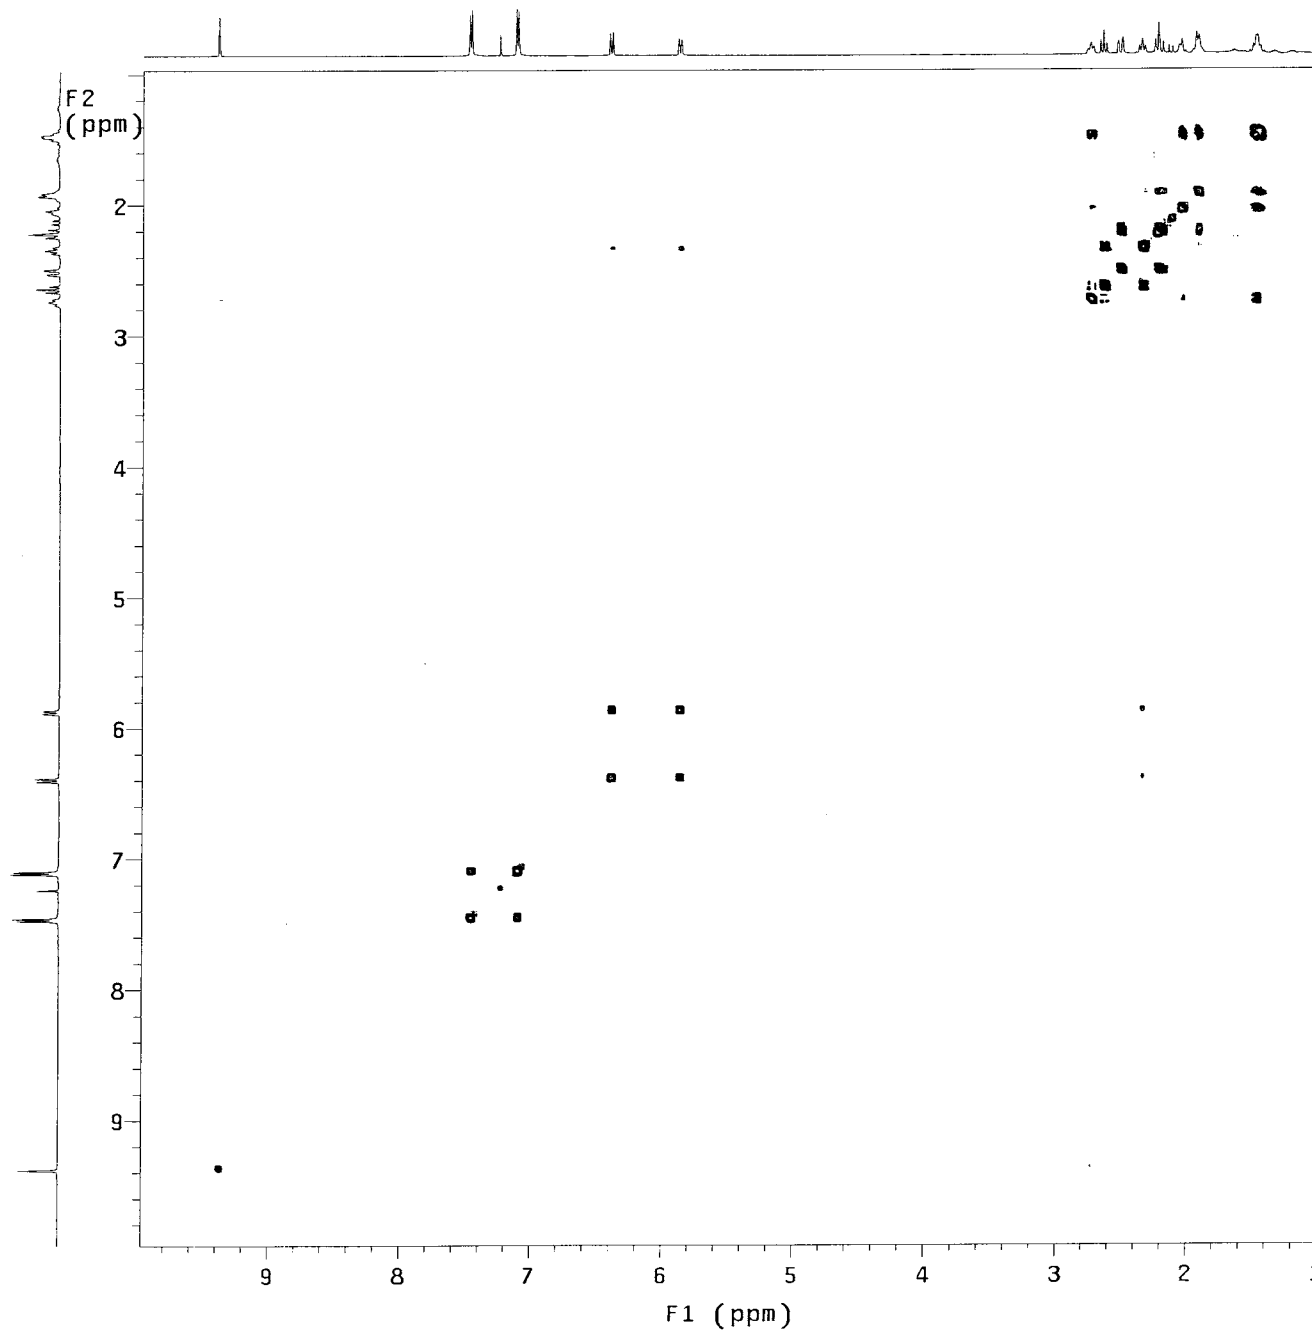

exp33 gHMQC

| SAMPLE           | FLAGS         | ACQUISITION | ARRAYS       |
|------------------|---------------|-------------|--------------|
| date Nov 2 2008  | hs            | n           | array phase  |
| solvent cdcl3    | sspul         | y           | arraydim 256 |
| sample undefined | PFGflg        | y           |              |
| ACQUISITION      | hsglv1        | 1026        | phase        |
| sw 4498.4        | SPECIAL       | 1           | 1            |
| at 0.228         | temp          | not used    | 2            |
| np 2048          | gain          | 20          |              |
| fb 3000          | spin          | 0           |              |
| ss 32            | GRADIENTS     |             |              |
| d1 1.000         | gzlv1         | 1026        |              |
| nt 16            | gt1           | 0.001000    |              |
| 2D ACQUISITION   | gzlv3         | 516         |              |
| sw1 21367.5      | gt3           | 0.001000    |              |
| ni 128           | gstab         | 0.000500    |              |
| phase arrayed    | F2 PROCESSING |             |              |
| TRANSMITTER      | gf            | 0.105       |              |
| tn H1            | gfs           | not used    |              |
| sfrq 499.836     | fn            | 2048        |              |
| tof 249.8        | F1 PROCESSING |             |              |
| tpwr 57          | gf1           | 0.006       |              |
| pw 13.000        | gfs1          | not used    |              |
| DECOUPLER        | proc1         | lp          |              |
| dn C13           | fn1           | 2048        |              |
| dof -2515.1      | DISPLAY       |             |              |
| dm nny           | sp            | 687.4       |              |
| dmm ccp          | wp            | 3527.6      |              |
| dmf 32258        | sp1           | 2862.4      |              |
| dpwr 35          | wp1           | 16609.9     |              |
| pwxlv1 51        | rfl           | 2708.6      |              |
| pwx 14.700       | rfl1          | 3193.9      |              |
| HMQC             | rfl1          | 20134.8     |              |
| j1xh 140.0       | rfl1          | 18865.5     |              |
| nullflg y        | PLOT          |             |              |
|                  | wc            | 150.0       |              |
|                  | sc            | 6.2         |              |
|                  | wc2           | 116.2       |              |
|                  | sc2           | 0           |              |
|                  | vs            | 28          |              |
|                  | th            | 6           |              |
|                  | ai            | cdc ph      |              |

Fig S39. HMQC of 5d (CDCl3).

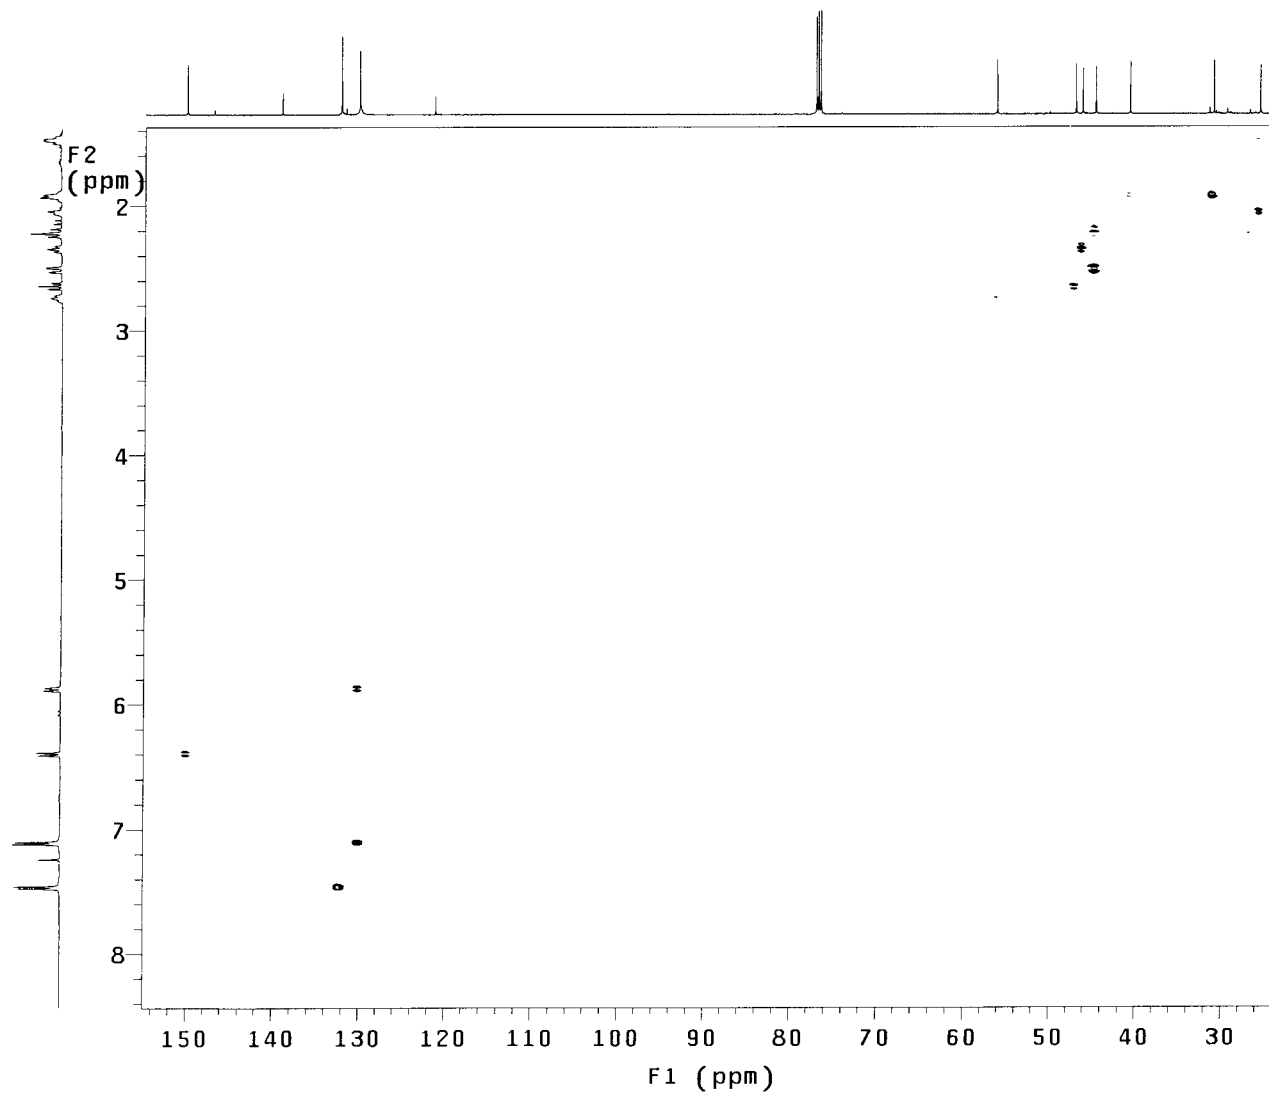

Fig S40. NOESY of 5d (CDCl3).

RYN-2-129

exp35 NOESY

| SAMPLE         |            | FLAGS         |          |
|----------------|------------|---------------|----------|
| date           | Nov 3 2008 | hs            | n        |
| solvent        | cdcl3      | sspul         | y        |
| sample         | undefined  | PFGflg        | y        |
| ACQUISITION    |            | hsglvl        | 1026     |
| sw             | 4498.4     | SPECIAL       |          |
| at             | 0.228      | temp          | not used |
| np             | 2048       | gain          | 28       |
| fb             | 3000       | spin          | 0        |
| ss             | 32         | F2 PROCESSING |          |
| d1             | 1.000      | gf            | 0.105    |
| nt             | 8          | gfs           | not used |
| 2D ACQUISITION |            | fn            | 2048     |
| sw1            | 4498.4     | F1 PROCESSING |          |
| ni             | 200        | gf1           | 0.041    |
| TRANSMITTER    |            | gfs1          | not used |
| tn             | H1         | procl         | 1p       |
| sfrq           | 499.836    | fn1           | 2048     |
| tof            | 249.8      | DISPLAY       |          |
| tpwr           | 57         | sp            | 485.9    |
| pw             | 13.000     | wp            | 4494.0   |
| NOESY          |            | sp1           | 487.5    |
| mix            | 0.400      | wpl           | 4494.0   |
| PRESATURATION  |            | rfl           | 2452.5   |
| satmode        | nnnn       | rfp           | 2934.0   |
| satpwr         | 0          | rfl1          | 2450.9   |
| satdly         | 0          | rfp1          | 2934.0   |
| satfrq         | 0          | PLOT          |          |
| DECOUPLER      |            | wc            | 155.0    |
| dn             | C13        | sc            | 10.0     |
| dm             | nnn        | wc2           | 155.0    |
|                |            | sc2           | 0        |
|                |            | vs            | 28       |
|                |            | th            | 3        |
|                |            | ai            | ph       |

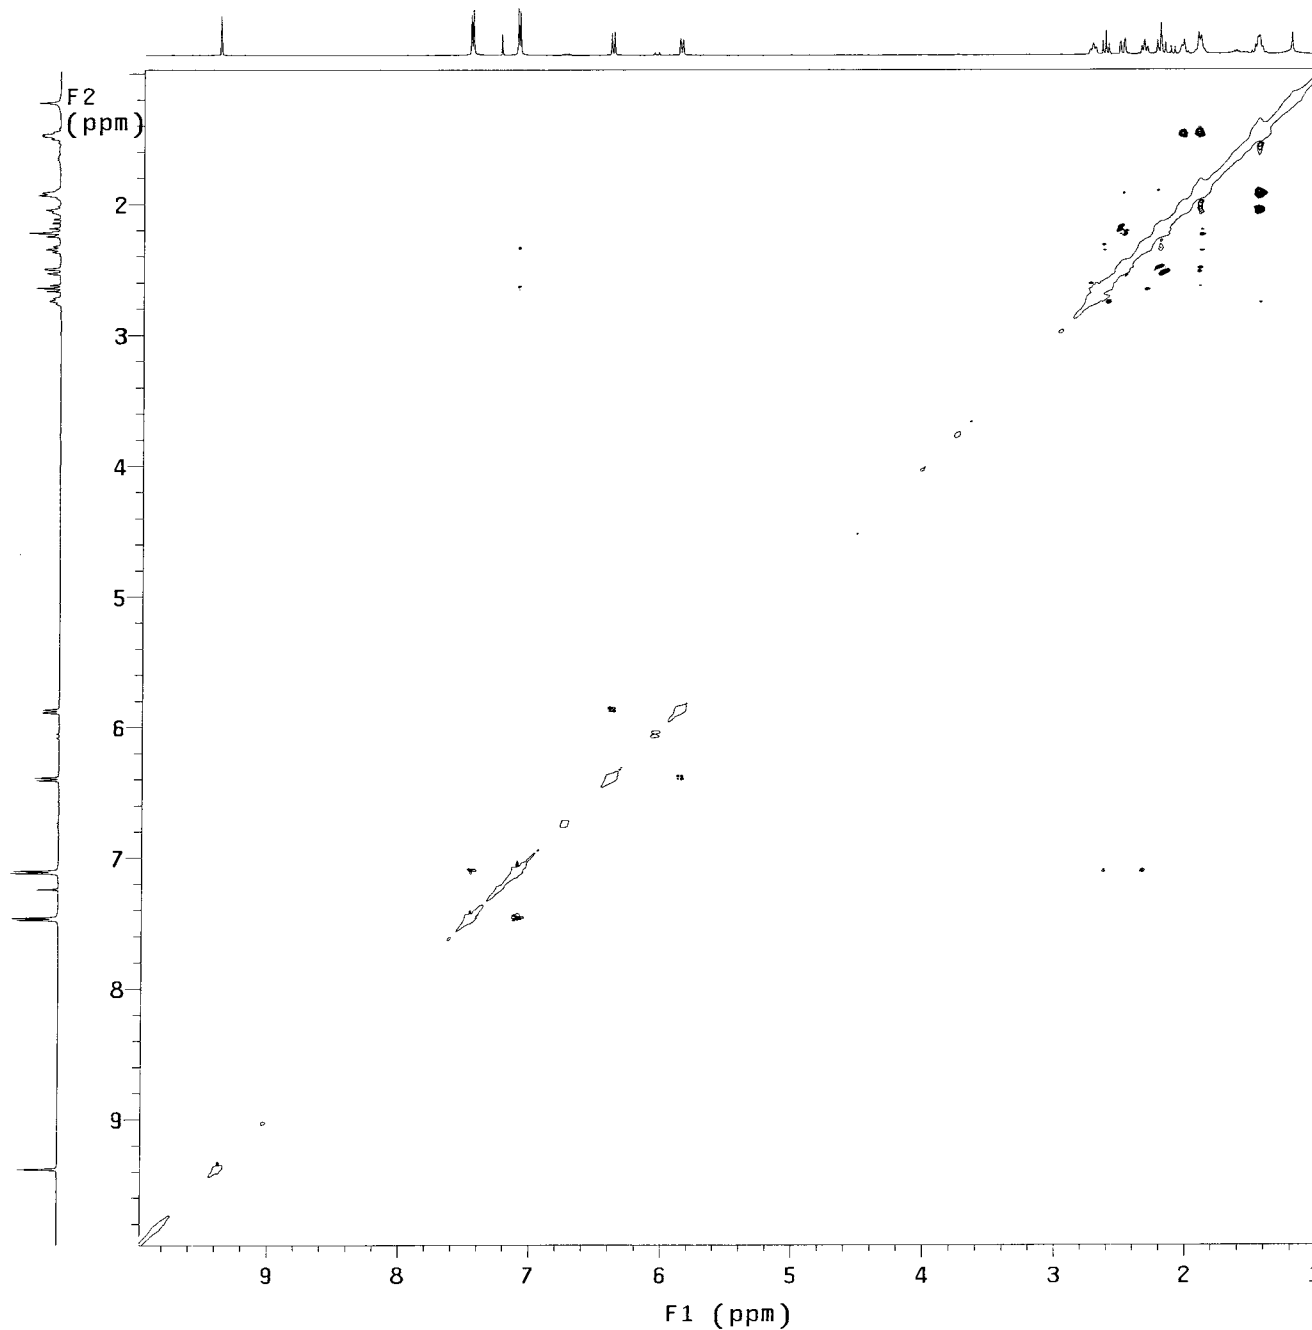



Fig S41. <sup>1</sup>H NMR of 5e (500 MHz, CDCl<sub>3</sub>).

RYN-2-130

exp11 s2pu1

```

SAMPLE
date Nov 3 2008 dfrq 125.695
solvent cdc13 dn C13
file exp dpwr 30
ACQUISITION
sfrq 499.836 dm nnn
tn H1 dmm 0
at 3.000 dmf 200
np 48000 dseq
sw 8000.0 dres 1.0
fb 4000 homo n
bs 4
tpwr 57 wtfile
pw 4.8 proc ft
d1 1.000 fn not used
tof 499.7 math f
nt 4
ct 4 werr react
alock y wexp procplot
gain not used wbs
FLAGS wnt wft
il n
in n
dp y
hs nn
DISPLAY
sp -250.1
wp 5498.0
vs 90
sc 0
wc 210
hzmm 26.18
is 119.62
rfl 4632.1
rfp 3618.8
th 4
ins 100.000
nm cdc ph
    
```

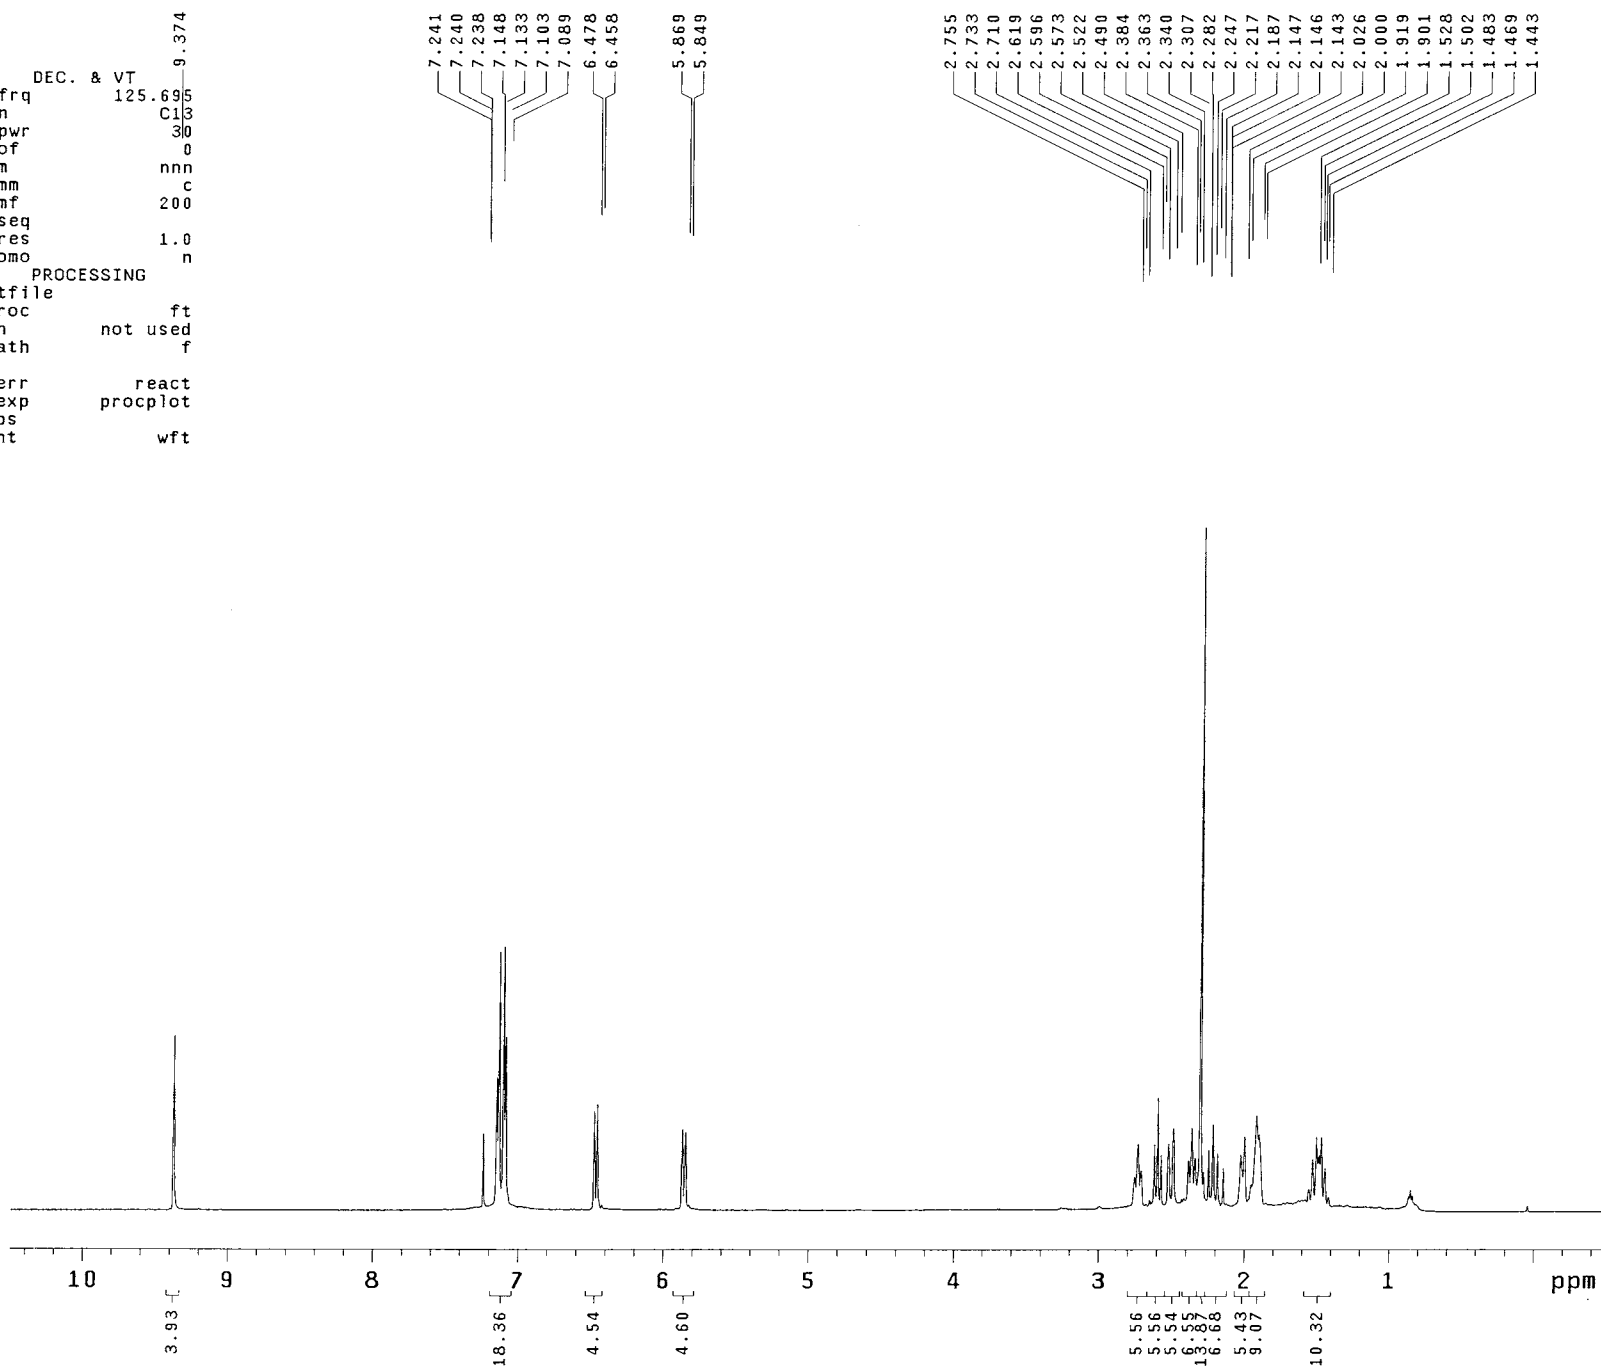

RYN-2-130  
 exp12 s2pu1

SAMPLE  
 date Nov 3 2008  
 solvent cdc13  
 file exp

ACQUISITION  
 sfrq 125.698  
 tn C13  
 at 1.000  
 np 62894  
 sw 31446.5  
 fb 17000  
 bs 16  
 ss 2  
 tpwr 54  
 pw 4.0  
 dl 1.000  
 tof 2512.2  
 nt 5000  
 ct 5000  
 alock y  
 gain not used

DEC. & VT  
 203.217  
 199.239

499.836  
 H1  
 39  
 0  
 yyv  
 w  
 11905  
 1.0  
 n

PROCESSING  
 lb 1.00  
 wtfile  
 proc ft  
 fn not used  
 math f

werr react  
 wexp proplot  
 wbs testsn  
 wnt

FLAGS  
 il n  
 in n  
 dp y  
 hs nn

DISPLAY  
 sp -1256.9  
 wp 27650.1  
 vs 69  
 sc 0  
 wc 210  
 hzmm 131.67  
 is 500.00  
 rfl 10982.5  
 rfp 9677.6  
 th 2  
 ins 100.000  
 nm ph

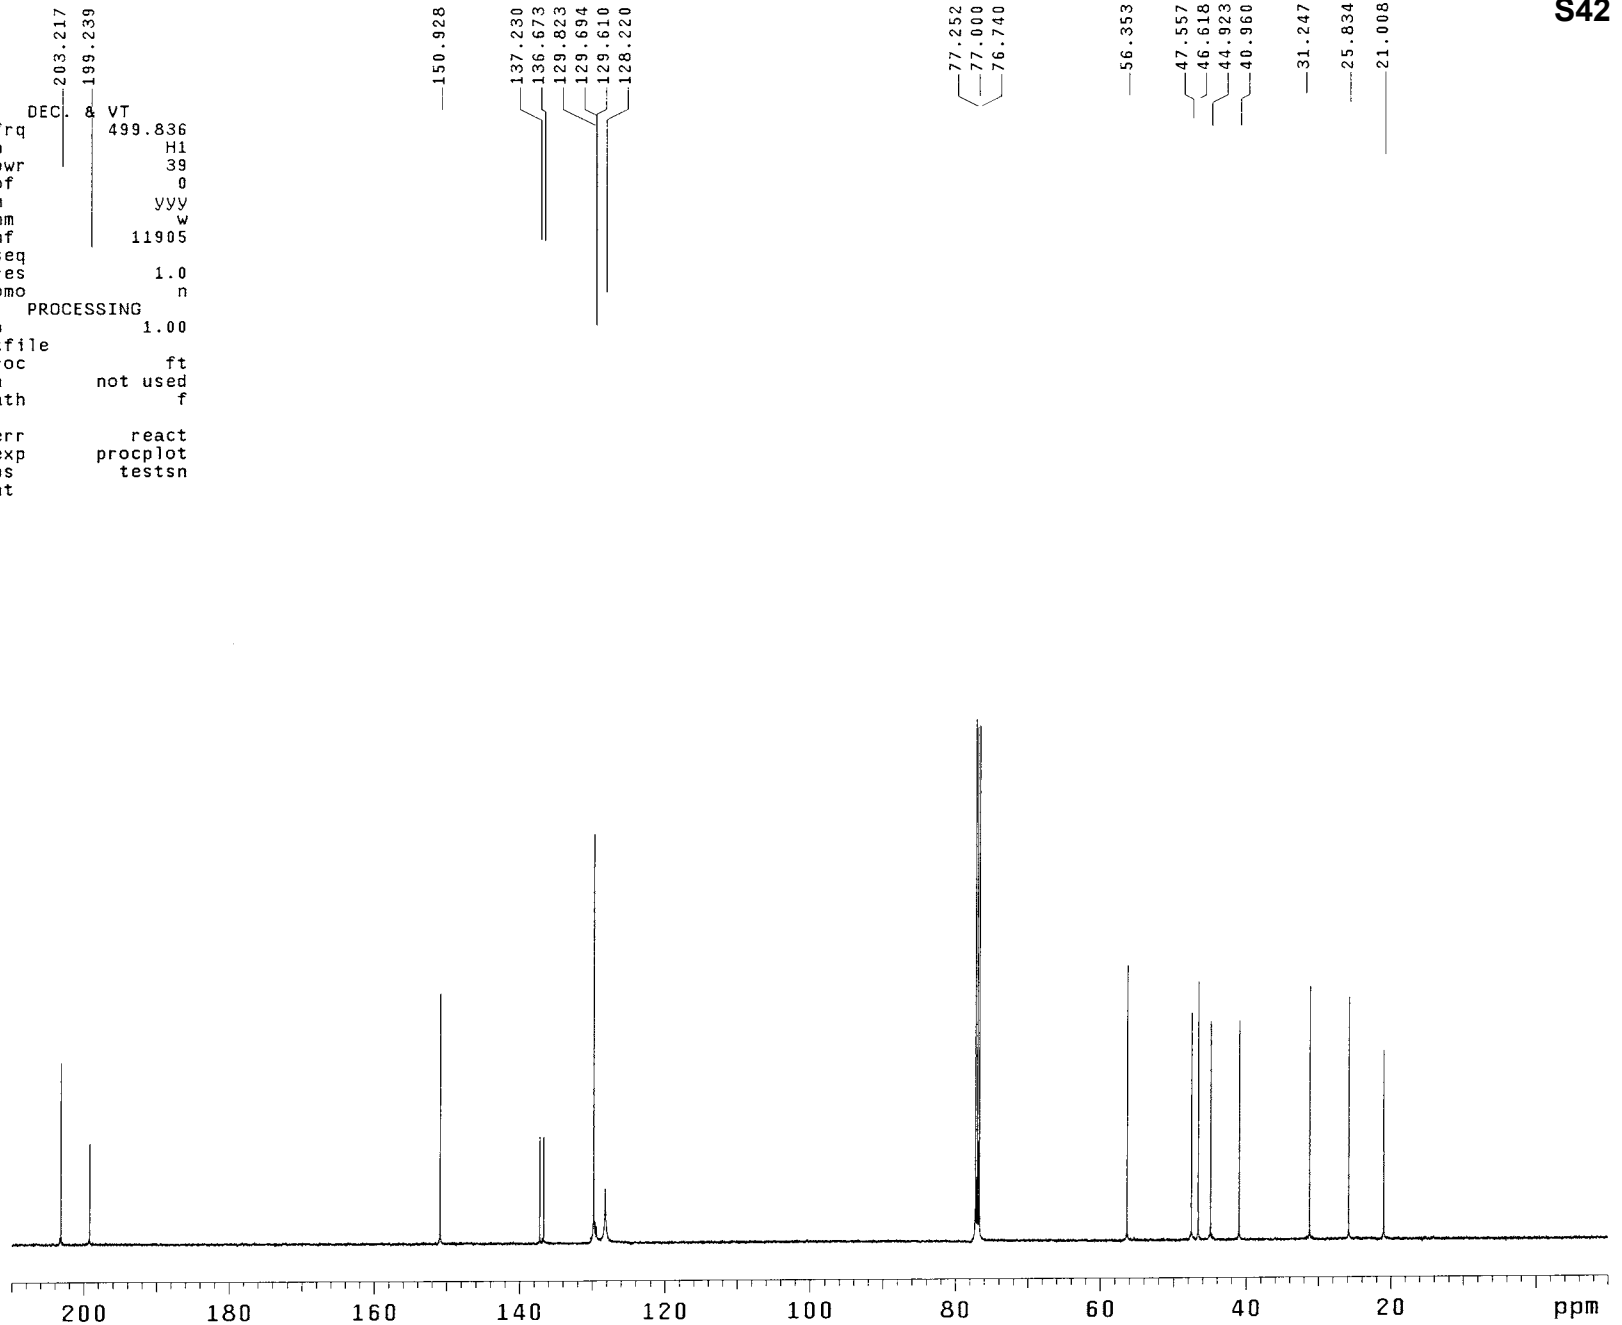Fig S42. <sup>13</sup>C NMR of 5e (125 MHz, CDCl<sub>3</sub>).

RYN-2-130

Fig S43. DEPT of 5e (CDCl<sub>3</sub>).

exp13 DEPT

|             |            |            |                    |            |
|-------------|------------|------------|--------------------|------------|
| SAMPLE      |            | DEPT       | ACQUISITION ARRAYS |            |
| date        | Nov 3 2008 | j1xh       | 140.0              | array mult |
| solvent     | cdcl3      | mult       | arrayed            | arraydim 3 |
| sample      | undefined  | SPECIAL    |                    |            |
| ACQUISITION |            | temp       | not used           | i mult     |
| sw          | 31446.5    | gain       | 28                 | 1 0.5      |
| at          | 1.000      | spin       | 0                  | 2 1        |
| np          | 62894      | PROCESSING |                    | 3 1.5      |
| bs          | 16         | lb         | 1.00               |            |
| ss          | -4         | fn         | not used           |            |
| d1          | 1.000      | SPECTRUM   |                    |            |
| nt          | 1000       | wp         | 27650.1            |            |
| ct          | 1000       | sp         | -1257.2            |            |
| TRANSMITTER |            | rp         | 32.8               |            |
| tn          | C13        | lp         | 56.3               |            |
| tof         | 2512.2     | ai         | cdc ph             |            |
| tpwr        | 54         | REFERENCE  |                    |            |
| pw          | 9.400      | rfl        | 1269.7             |            |
| DECOUPLER   |            | rfp        | 0                  |            |
| dn          | H1         | PLOT       |                    |            |
| dof         | 0          | wc         | 210                |            |
| dpwr        | 39         | sc         | 0                  |            |
| dm          | nny        | vs         | 312                |            |
| dmm         | ccw        | hzmm       | 131.67             |            |
| dmf         | 11905      | th         | 68                 |            |
| pplv1       | 49         |            |                    |            |
| pp          | 29.400     |            |                    |            |

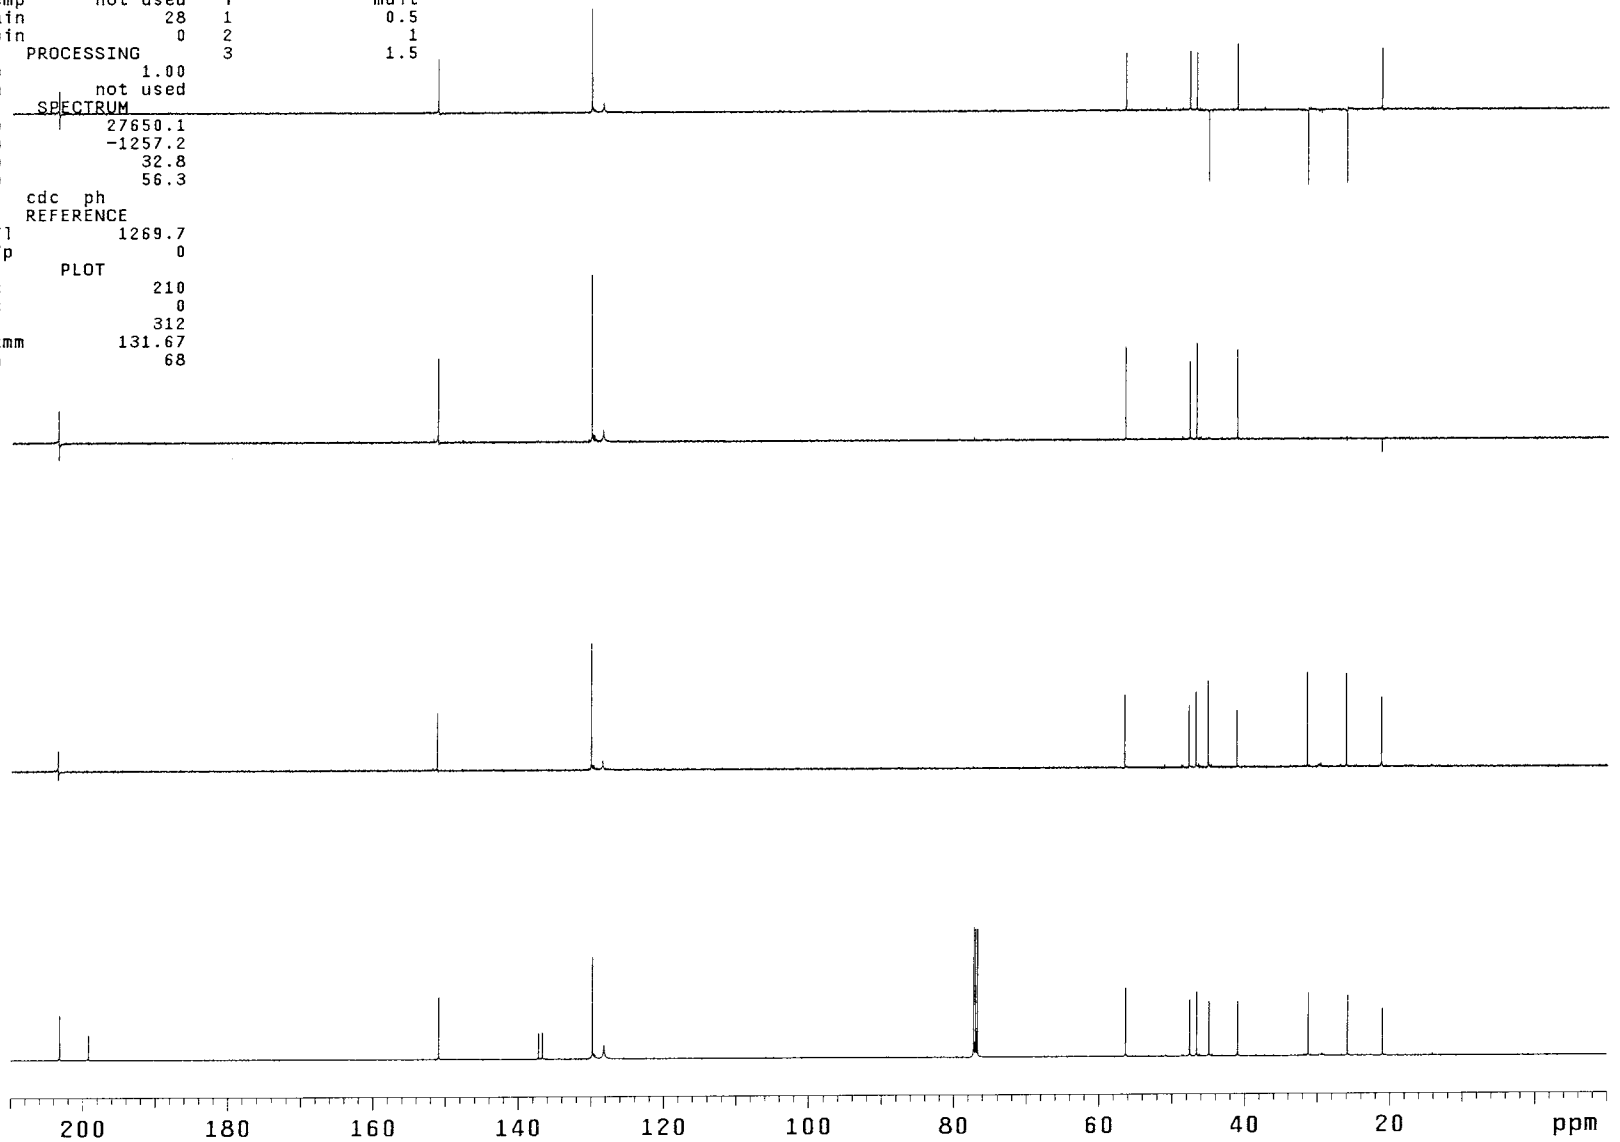

Fig S44. COSY of 5e (CDCl<sub>3</sub>).

RYN-2-130

exp14 gCOSY

|                |            |               |          |
|----------------|------------|---------------|----------|
| date           | Nov 3 2008 | hs            | nn       |
| solvent        | cdc13      | sspul         | n        |
| sample         | undefined  | hsglv1        | 1026     |
| ACQUISITION    |            |               |          |
| sw             | 4308.5     | temp          | not used |
| at             | 0.238      | gain          | 28       |
| np             | 2048       | spin          | 0        |
| fb             | 2000       | F2 PROCESSING |          |
| ss             | 16         | sb            | -0.119   |
| dl             | 1.000      | sbs           | not used |
| nt             | 16         | fn            | 2048     |
| 2D ACQUISITION |            |               |          |
| sw1            | 4308.5     | sb1           | -0.030   |
| ni             | 128        | sbs1          | not used |
| TRANSMITTER    |            |               |          |
| tn             | H1         | proc1         | lp       |
| sfrq           | 499.836    | fn1           | 2048     |
| tof            | 344.8      | DISPLAY       |          |
| tpwr           | 57         | sp            | 678.8    |
| pw             | 13.000     | wp            | 4304.3   |
| GRADIENTS      |            |               |          |
| gzlv11         | 1026       | sp1           | 678.8    |
| gt1            | 0.001000   | wp1           | 4304.3   |
| gstab          | 0.000500   | rfl           | 2249.4   |
| DECOUPLER      |            |               |          |
| dn             | C13        | rfl1          | 2249.4   |
| dm             | nnn        | rfp1          | 2924.0   |
| PLOT           |            |               |          |
|                |            | wc            | 155.0    |
|                |            | sc            | 10.0     |
|                |            | wc2           | 155.0    |
|                |            | sc2           | 0        |
|                |            | vs            | 1814     |
|                |            | th            | 4        |
|                |            | ai            | cdc av   |

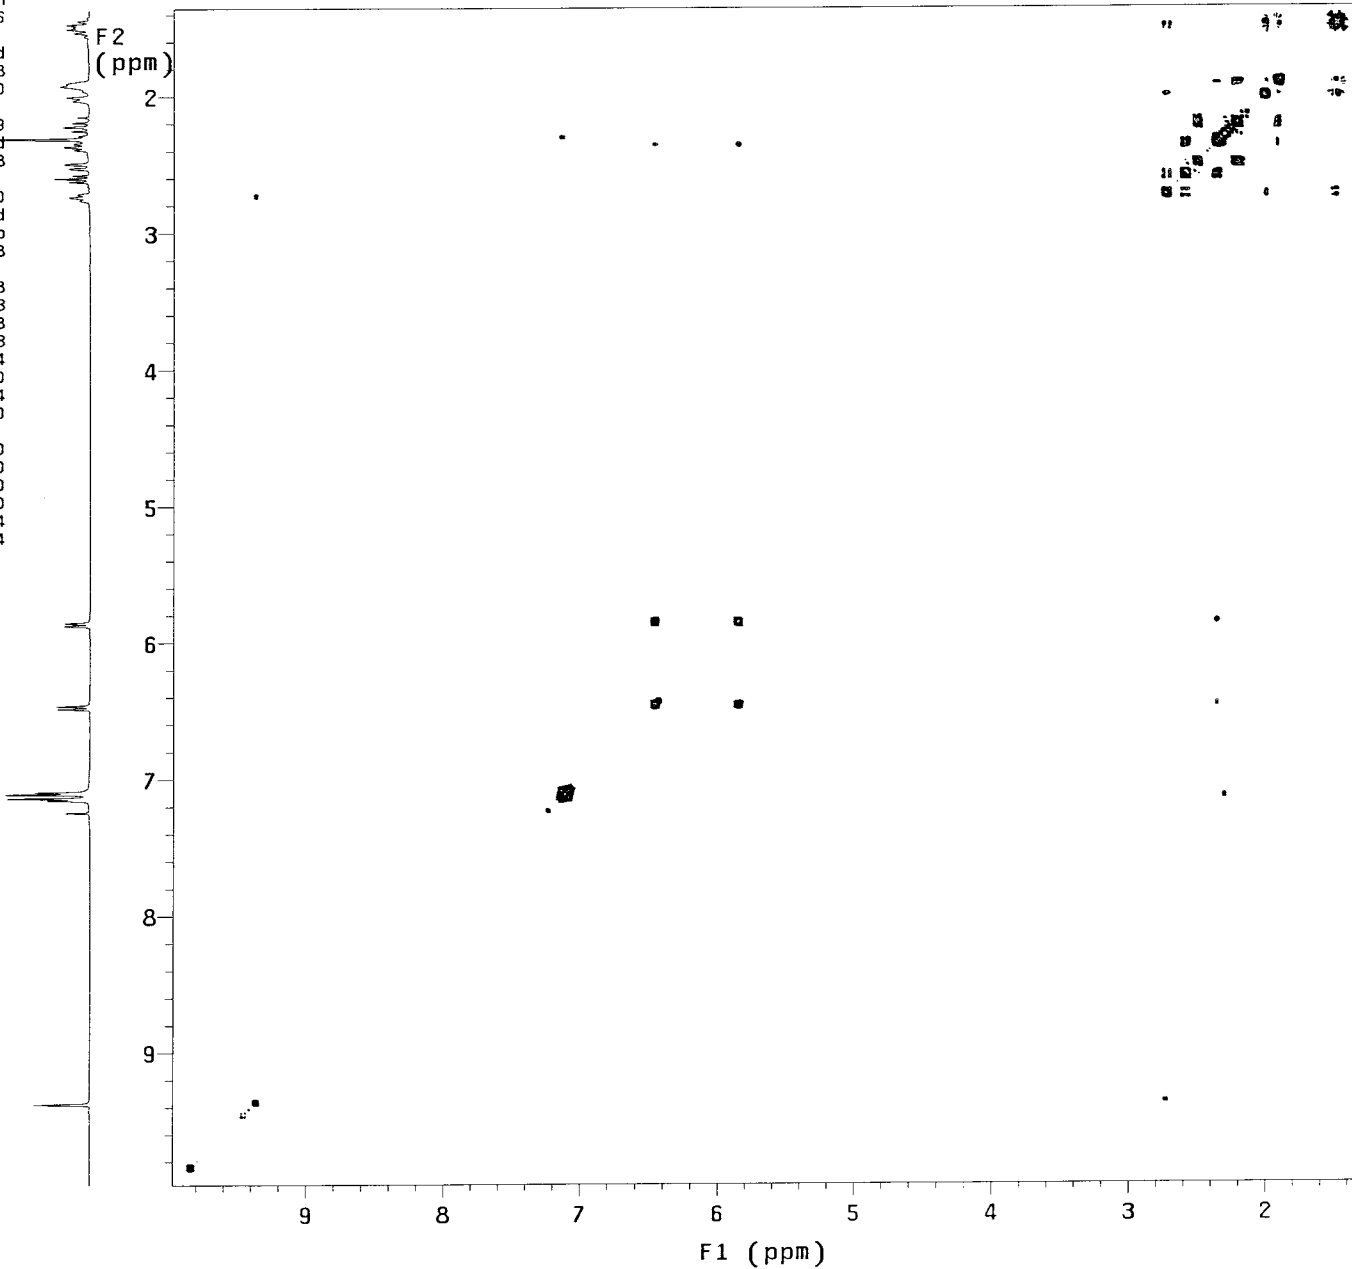

RYN-2-130

exp15 gHMQC

| SAMPLE           | FLAGS         | ACQUISITION | ARRAYS       |
|------------------|---------------|-------------|--------------|
| date Nov 3 2008  | hs            | n           | phase        |
| solvent cdc13    | sspu1         | y           | arraydim 256 |
| sample undefined | PFGflg        | y           |              |
| ACQUISITION      | hsglv1        | 1026        | i phase      |
| sw 4308.5        | SPECIAL       | 1           | 1            |
| at 0.238         | temp not used | 2           | 2            |
| np 2048          | gain 28       |             |              |
| fb 2000          | spin 0        |             |              |
| ss 32            | GRADIENTS     |             |              |
| d1 1.000         | gzlv11        | 1026        |              |
| nt 16            | gt1           | 0.001000    |              |
| 2D ACQUISITION   | gzlv13        | 516         |              |
| sw1 21367.5      | gt3           | 0.001000    |              |
| ni 128           | gstab         | 0.000500    |              |
| phase arrayed    | F2 PROCESSING |             |              |
| TRANSMITTER      | gf            | 0.110       |              |
| tn H1            | gfs           | not used    |              |
| sfrq 499.836     | fn            | 2048        |              |
| tof 344.8        | F1 PROCESSING |             |              |
| tpwr 57          | gf1           | 0.006       |              |
| pw 13.000        | gfs1          | not used    |              |
| DECOUPLER        | proc1         | lp          |              |
| dn C13           | fn1           | 2048        |              |
| dof -2515.1      | DISPLAY       |             |              |
| dm nny           | sp            | 856.6       |              |
| dmm ccp          | wp            | 3159.8      |              |
| dmf 32258        | sp1           | 2102.1      |              |
| dpwr 35          | wp1           | 17632.4     |              |
| pxlv1 51         | rfl           | 2553.2      |              |
| pxw 14.700       | rfp           | 3228.9      |              |
| HMQC             | rfl1          | 20289.1     |              |
| j1xh 140.0       | rfp1          | 18969.1     |              |
| nullflg y        | PLOT          |             |              |
|                  | wc            | 150.0       |              |
|                  | sc            | 6.2         |              |
|                  | wc2           | 116.2       |              |
|                  | sc2           | 0           |              |
|                  | vs            | 1814        |              |
|                  | th            | 4           |              |
|                  | ai cdc ph     |             |              |

Fig S45. HMQC of 5e (CDCl<sub>3</sub>).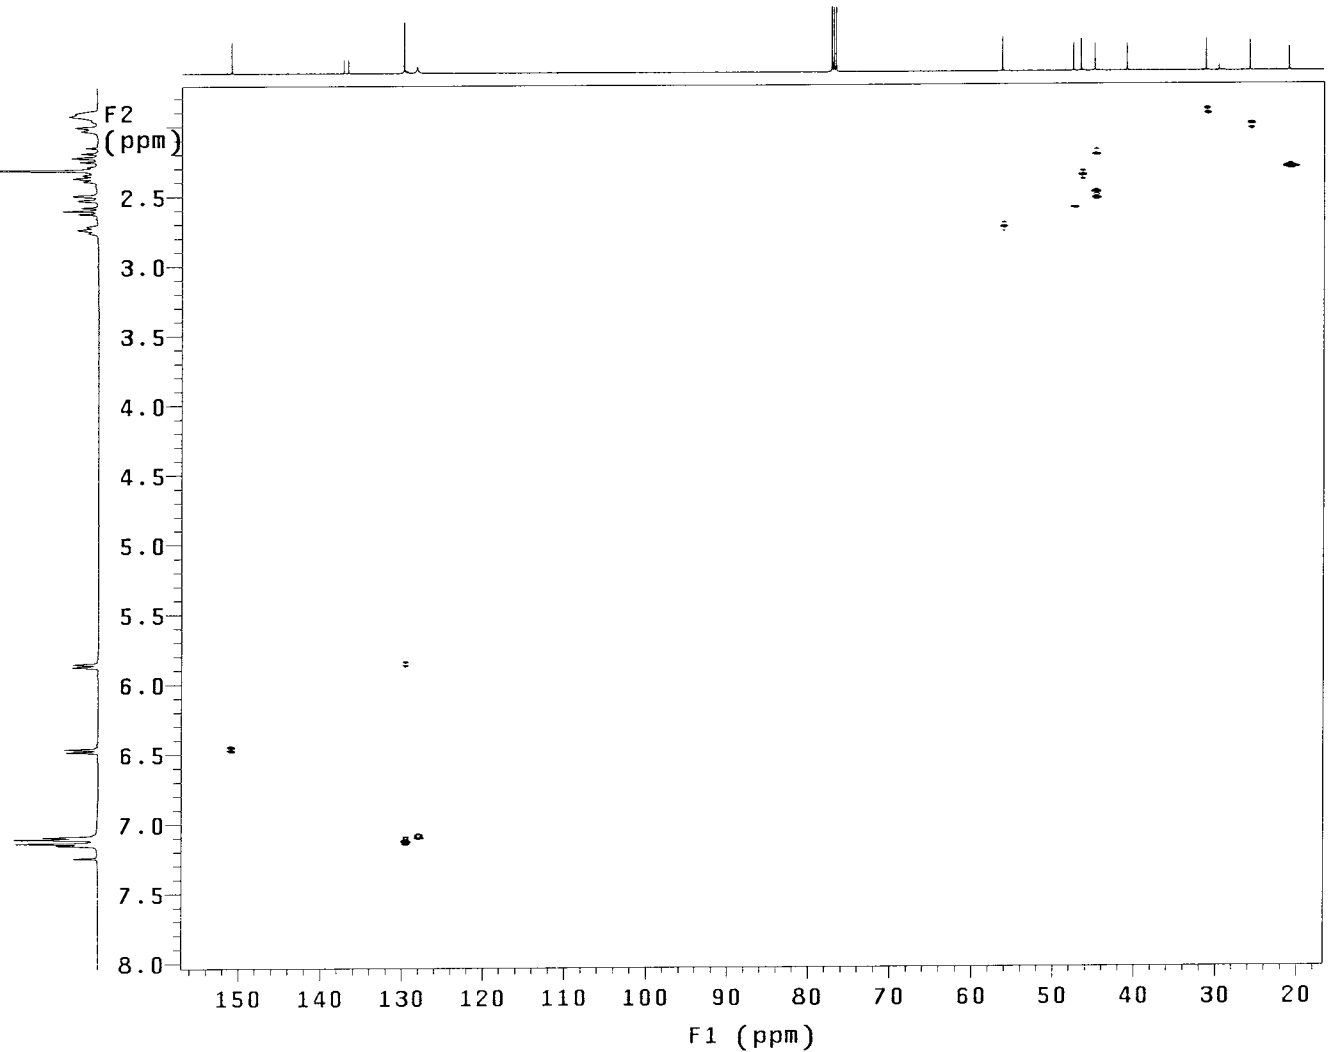

Fig S46. NOESY of 5e (CDCl3).

RYN-2-130

exp16 NOESY

|                |            |               |          |
|----------------|------------|---------------|----------|
| date           | Nov 3 2008 | hs            | n        |
| solvent        | cdc13      | sspul         | y        |
| sample         | undefined  | PFGflg        | y        |
| ACQUISITION    |            | hsglvl        | 1026     |
| sw             | 4308.5     | SPECIAL       |          |
| at             | 0.238      | temp          | not used |
| np             | 2048       | gain          | 20       |
| fb             | 2000       | spin          | 0        |
| ss             | 32         | F2 PROCESSING |          |
| dl             | 1.000      | gf            | 0.110    |
| nt             | 8          | gfs           | not used |
| 2D ACQUISITION |            | fn            | 2048     |
| sw1            | 4308.5     | F1 PROCESSING |          |
| ni             | 200        | gf1           | 0.043    |
| TRANSMITTER    |            | gfs1          | not used |
| tn             | H1         | proci         | lp       |
| sfrq           | 499.836    | fn1           | 2048     |
| tof            | 344.8      | DISPLAY       |          |
| tpwr           | 57         | sp            | 680.6    |
| pw             | 13.000     | wp            | 4304.3   |
| NOESY          |            | sp1           | 677.0    |
| mix            | 0.600      | wp1           | 4304.3   |
| PRESATURATION  |            | rfl           | 2247.7   |
| satmode        | nnnn       | rfp           | 2924.0   |
| satpwr         | 0          | rfl1          | 2251.2   |
| satdly         | 0          | rfp1          | 2924.0   |
| satfrq         | 0          | PLOT          |          |
| DECOUPLER      |            | wc            | 155.0    |
| dn             | C13        | sc            | 10.0     |
| dm             | nnn        | wc2           | 155.0    |
|                |            | sc2           | 0        |
|                |            | vs            | 113      |
|                |            | th            | 2        |
|                |            | ai            | ph       |

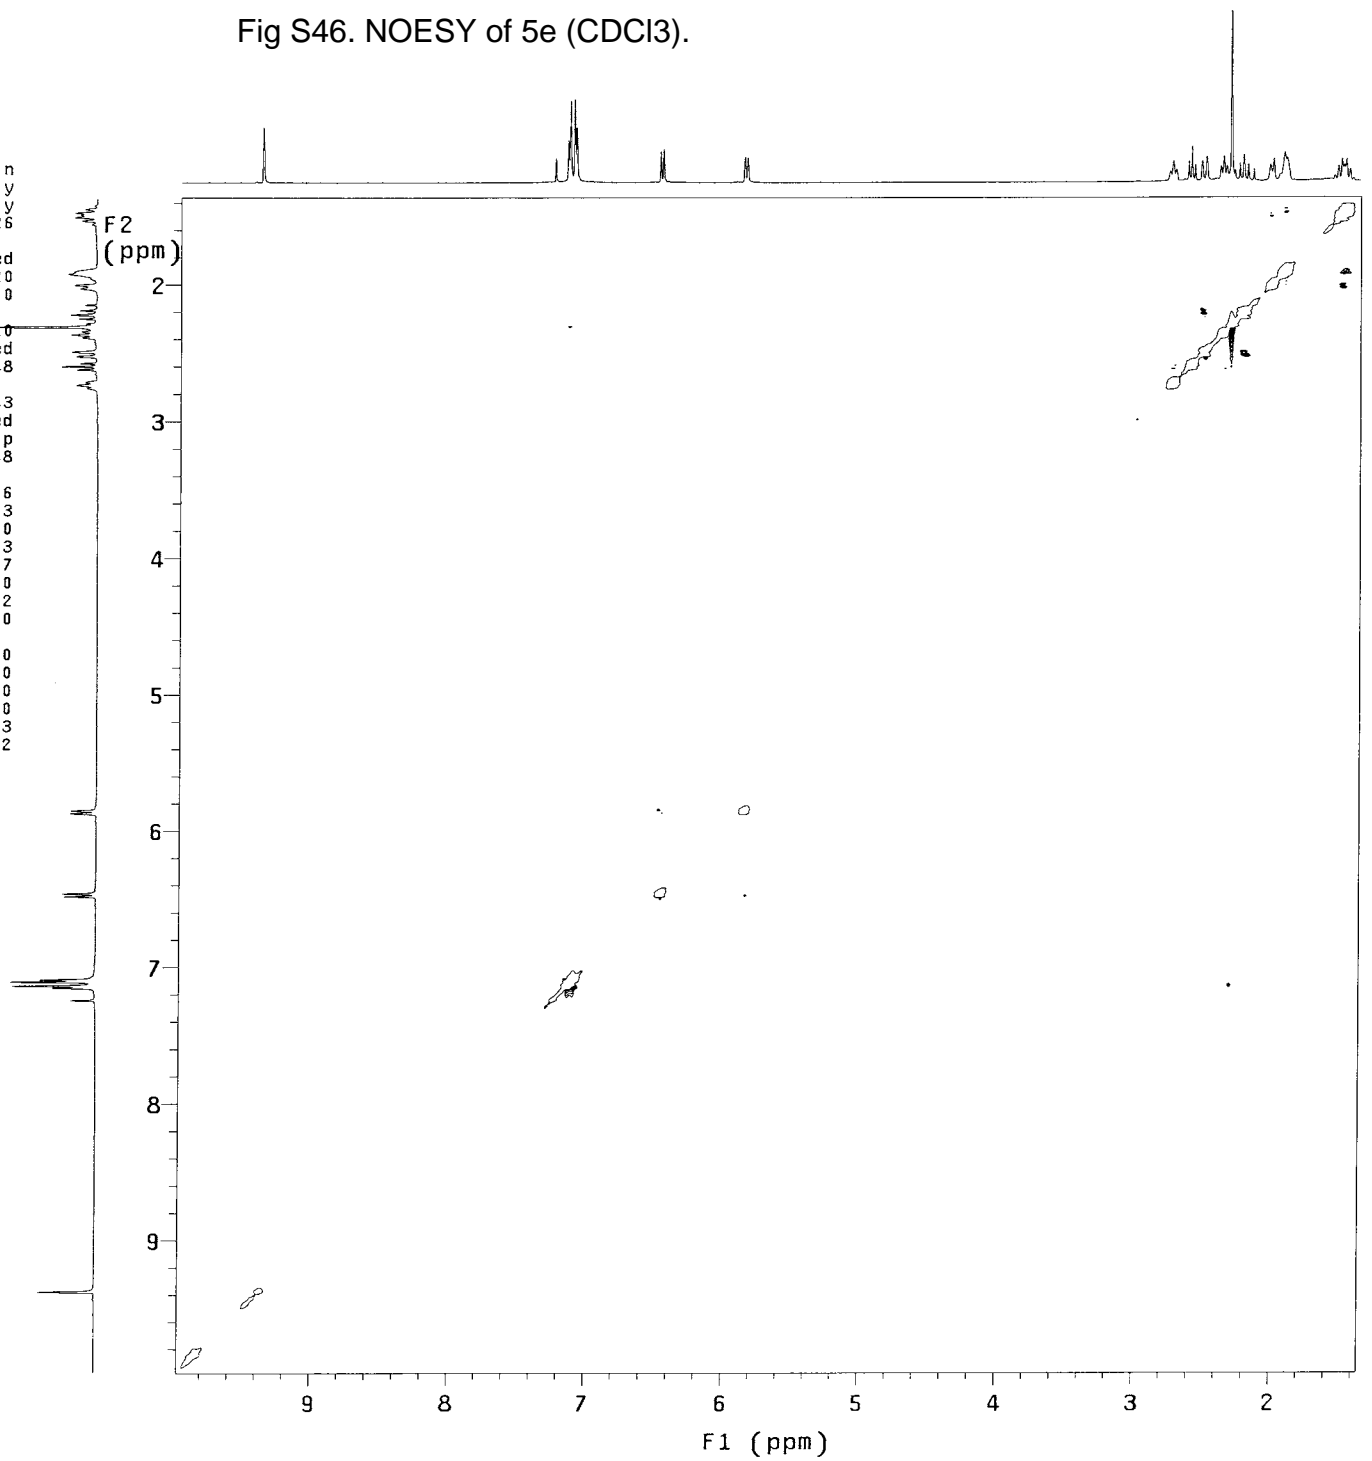

Fig S47. <sup>1</sup>H NMR of 5f (500 MHz, CDCl<sub>3</sub>).

RYN-2-133

exp3 s2pul

```

SAMPLE          DEC. & VT
date Jan 6 2009 dfrq      125.695
solvent cdc13   dn        C13
file exp      dpwr      30
ACQUISITION
sfrq 499.836 dm         nnn
tn H1 dmm             c
at 3.000 dmf         200
np 48000 dseq
sw 8000.0 dres       1.0
fb 4000 homo        n
bs 4
tpwr 57 wtfile
pw 4.8 proc
dl 1.000 fn         not used
tof 499.7 math
nt 4
ct 4 werr          react
alock y wexp       procplot
gain not used wbs
FLAGS wnt
wft

DISPLAY
sp -250.1
wp 5498.0
vs 34
sc 0
wc 210
hzmm 26.18
is 110.59
rfl 4631.3
rfp 3618.8
th 8
ins 100.000
nm ph
    
```

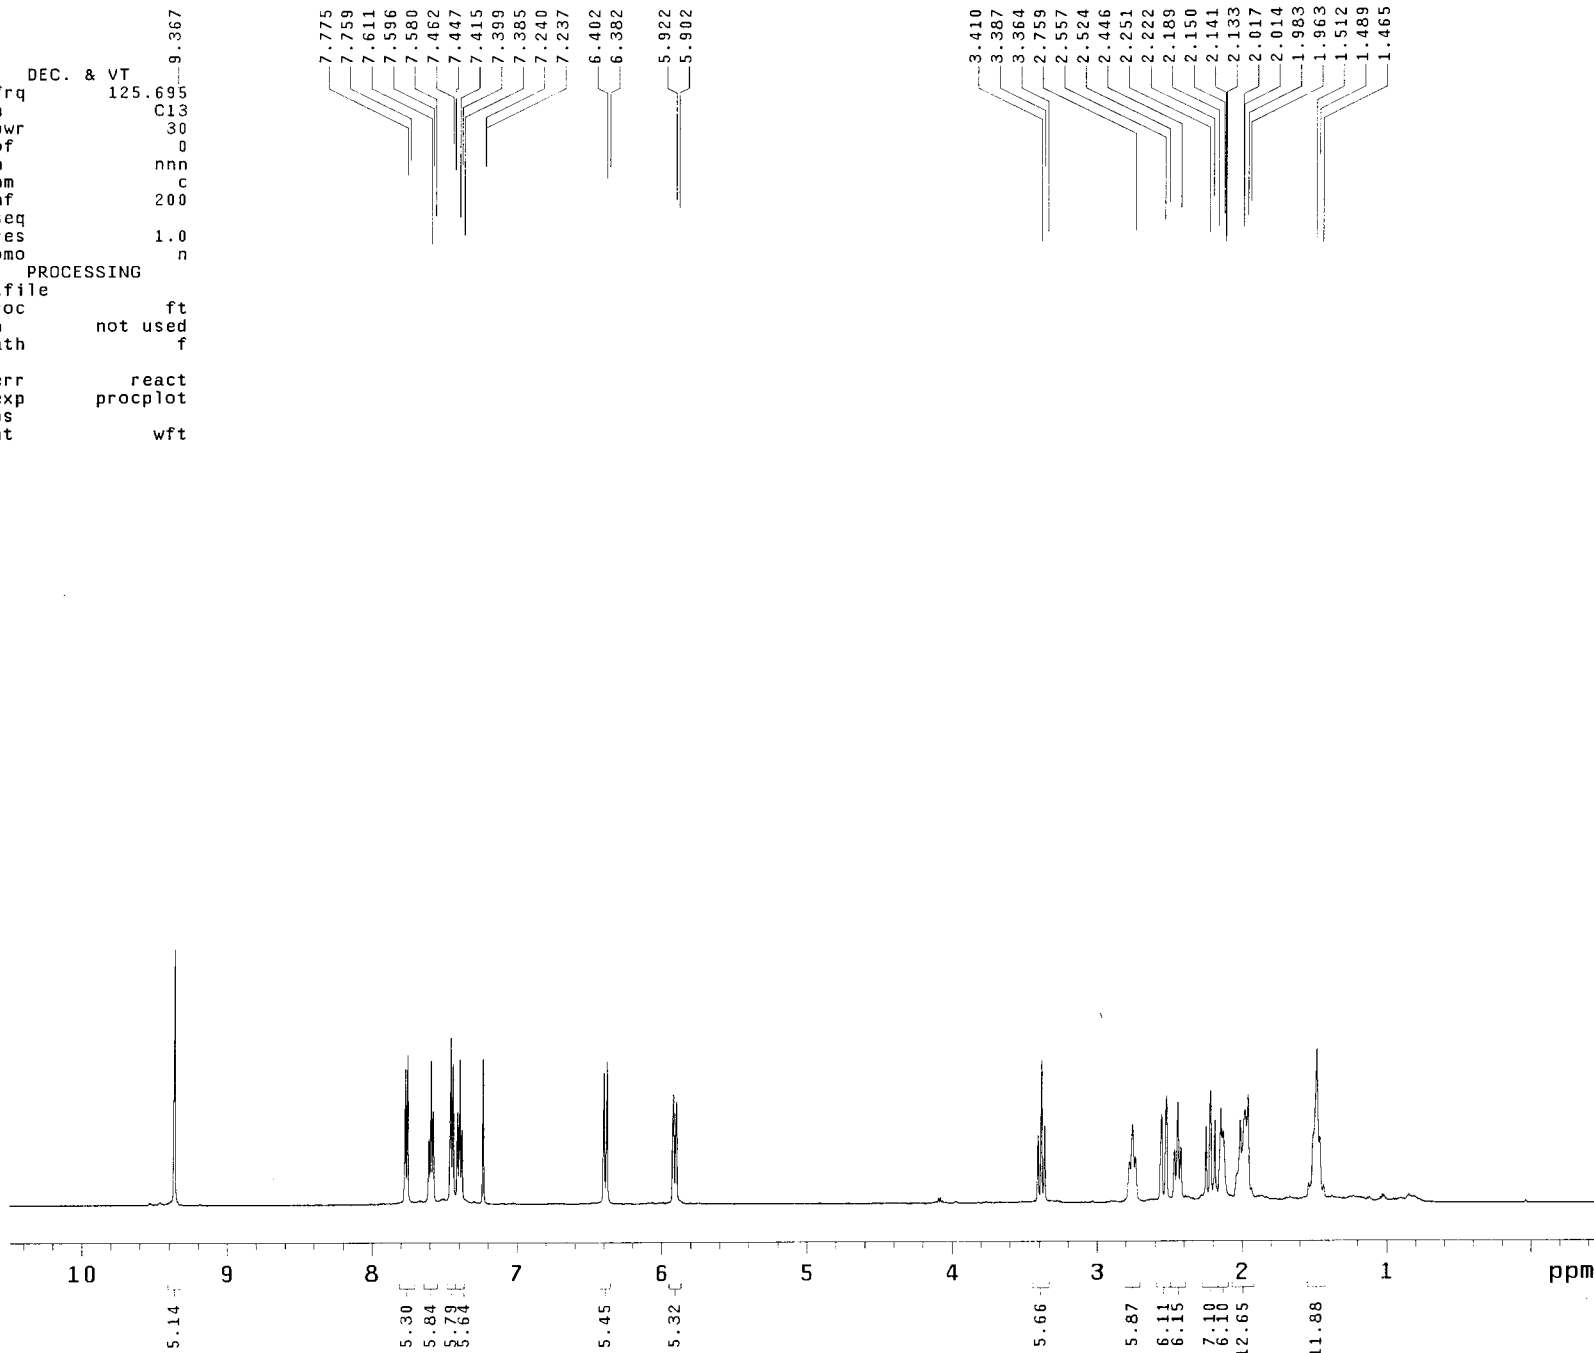

```

RYN-1-133
exp37 s2pu1

SAMPLE
date Nov 6 2008 dfrq 499.836
solvent cdcl3 dn H1
file exp dpwr 39
ACQUISITION dof 0
sfrq 125.698 dm yyy
tn C13 dmm w
at 1.000 dmf 11905
np 62894 dseq
sw 31446.5 dres 1.0
fb 17000 homo n
bs 16
ss 2 PROCESSING lb 1.00
tpwr 54 wtfile
pw 4.0 proc ft
d1 1.000 fn not used
tof 2512.2 math f
nt 20000
ct 7392 werr react
alock y wexp procplot
gain not used wbs testsn
FLAGS wnt

DISPLAY
sp -1256.9
wp 27650.1
vs 90
sc 0
wc 210
hzmm 131.67
is 500.00
rfl 10981.5
rfp 9677.6
th 3
ins 100.000
nm ph

```

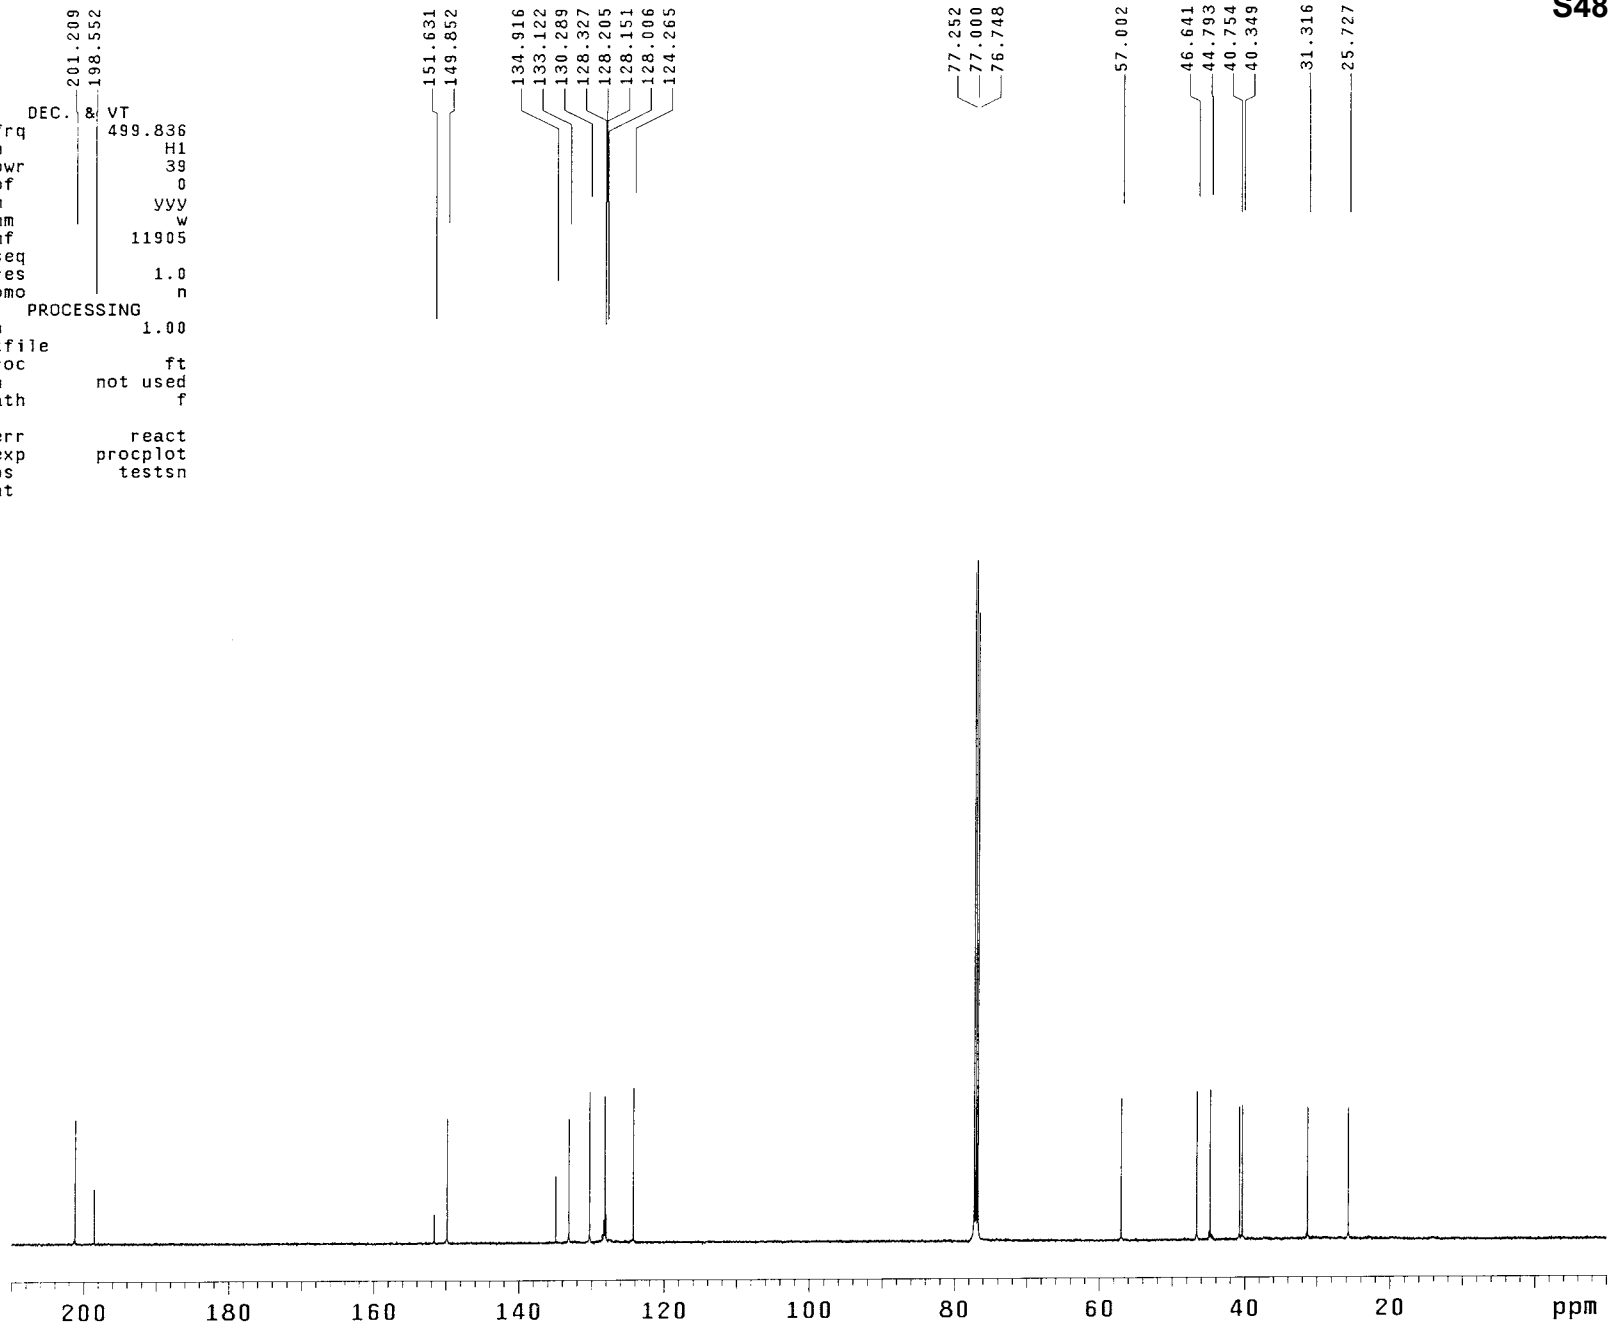Fig S48.  $^{13}\text{C}$  NMR of 5f (125 MHz,  $\text{CDCl}_3$ ).



Fig S49. DEPT of 5f (CDCl3).

RYN-2-133

exp32 DEPT

|             |            |            |                    |          |
|-------------|------------|------------|--------------------|----------|
| SAMPLE      |            | DEPT       | ACQUISITION ARRAYS |          |
| date        | Nov 6 2008 | j1xh       | 140.0              | array    |
| solvent     | cdcl3      | mult       | arrayed            | mult     |
| sample      | undefined  | SPECIAL    |                    | arraydim |
| ACQUISITION |            | temp       | not used           | i        |
| sw          | 31446.5    | gain       | 28                 | mult     |
| at          | 1.000      | spin       | 0                  | 0.5      |
| np          | 62894      | PROCESSING |                    | 1        |
| bs          | 16         | lb         | 1.00               | 3        |
| ss          | -4         | fn         | not used           | 1.5      |
| d1          | 1.000      | SPECTRUM   |                    |          |
| nt          | 1500       | wp         | 27650.1            |          |
| ct          | 1500       | sp         | -1257.2            |          |
| TRANSMITTER |            | rp         | 32.3               |          |
| tn          | C13        | lp         | 63.1               |          |
| tof         | 2512.2     | ai         | cdc ph             |          |
| tpwr        | 54         | REFERENCE  |                    |          |
| pw          | 9.400      | rfl        | 1269.7             |          |
| DECOUPLER   |            | rfp        | 0                  |          |
| dn          | H1         | PLOT       |                    |          |
| dof         | 0          | wc         | 210                |          |
| dpwr        | 39         | sc         | 0                  |          |
| dm          | nny        | vs         | 550                |          |
| dmm         | ccw        | hzmm       | 131.67             |          |
| dmf         | 11905      | th         | 68                 |          |
| pp1v1       | 49         |            |                    |          |
| pp          | 29.400     |            |                    |          |

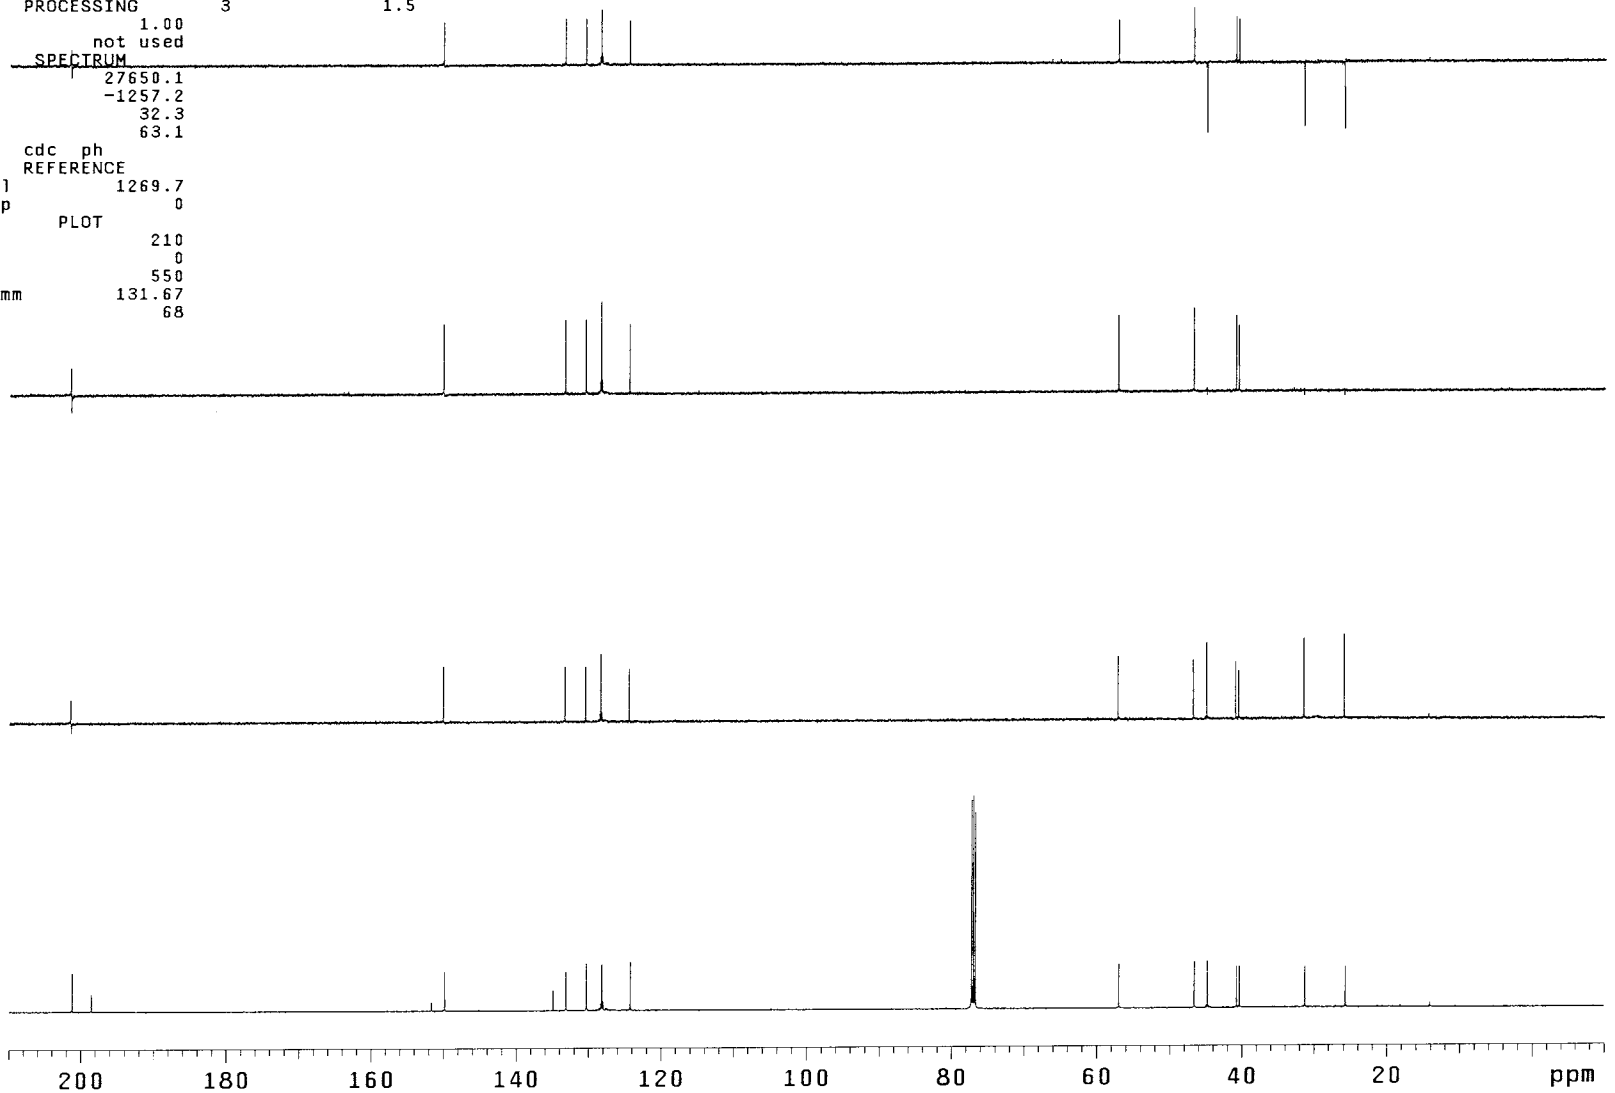

Fig S50. COSY of 5f (CDCl3).

RYN-2-133

exp33 gCOSY

|                |            |               |          |
|----------------|------------|---------------|----------|
| SAMPLE         |            | FLAGS         |          |
| date           | Nov 6 2008 | hs            | nn       |
| solvent        | cdcl3      | sspul         | n        |
| sample         | undefined  | hsglv1        | 1026     |
| ACQUISITION    |            | SPECIAL       |          |
| sw             | 4498.4     | temp          | not used |
| at             | 0.228      | gain          | 28       |
| np             | 2048       | spin          | 0        |
| fb             | 3000       | F2 PROCESSING |          |
| ss             | 16         | sb            | -0.114   |
| di             | 1.000      | sbs           | not used |
| nt             | 16         | fn            | 2048     |
| 2D ACQUISITION |            | F1 PROCESSING |          |
| sw1            | 4498.4     | sb1           | -0.028   |
| ni             | 128        | sbs1          | not used |
| TRANSMITTER    |            | proci         | lp       |
| tn             | H1         | fn1           | 2048     |
| sfrq           | 499.836    | DISPLAY       |          |
| tof            | 249.8      | sp            | 504.2    |
| tpwr           | 57         | wp            | 4494.0   |
| pw             | 13.000     | sp1           | 504.2    |
| GRADIENTS      |            | wp1           | 4494.0   |
| gzlv11         | 1026       | rfl           | -499.8   |
| gt1            | 0.001000   | rfp           | 0        |
| gstab          | 0.000500   | rfl1          | -499.8   |
| DECOUPLER      |            | rfp1          | 0        |
| dn             | C13        | PLOT          |          |
| dm             | nnn        | wc            | 155.0    |
|                |            | sc            | 10.0     |
|                |            | wc2           | 155.0    |
|                |            | sc2           | 0        |
|                |            | vs            | 57       |
|                |            | th            | 7        |
|                |            | ai            | cdc av   |

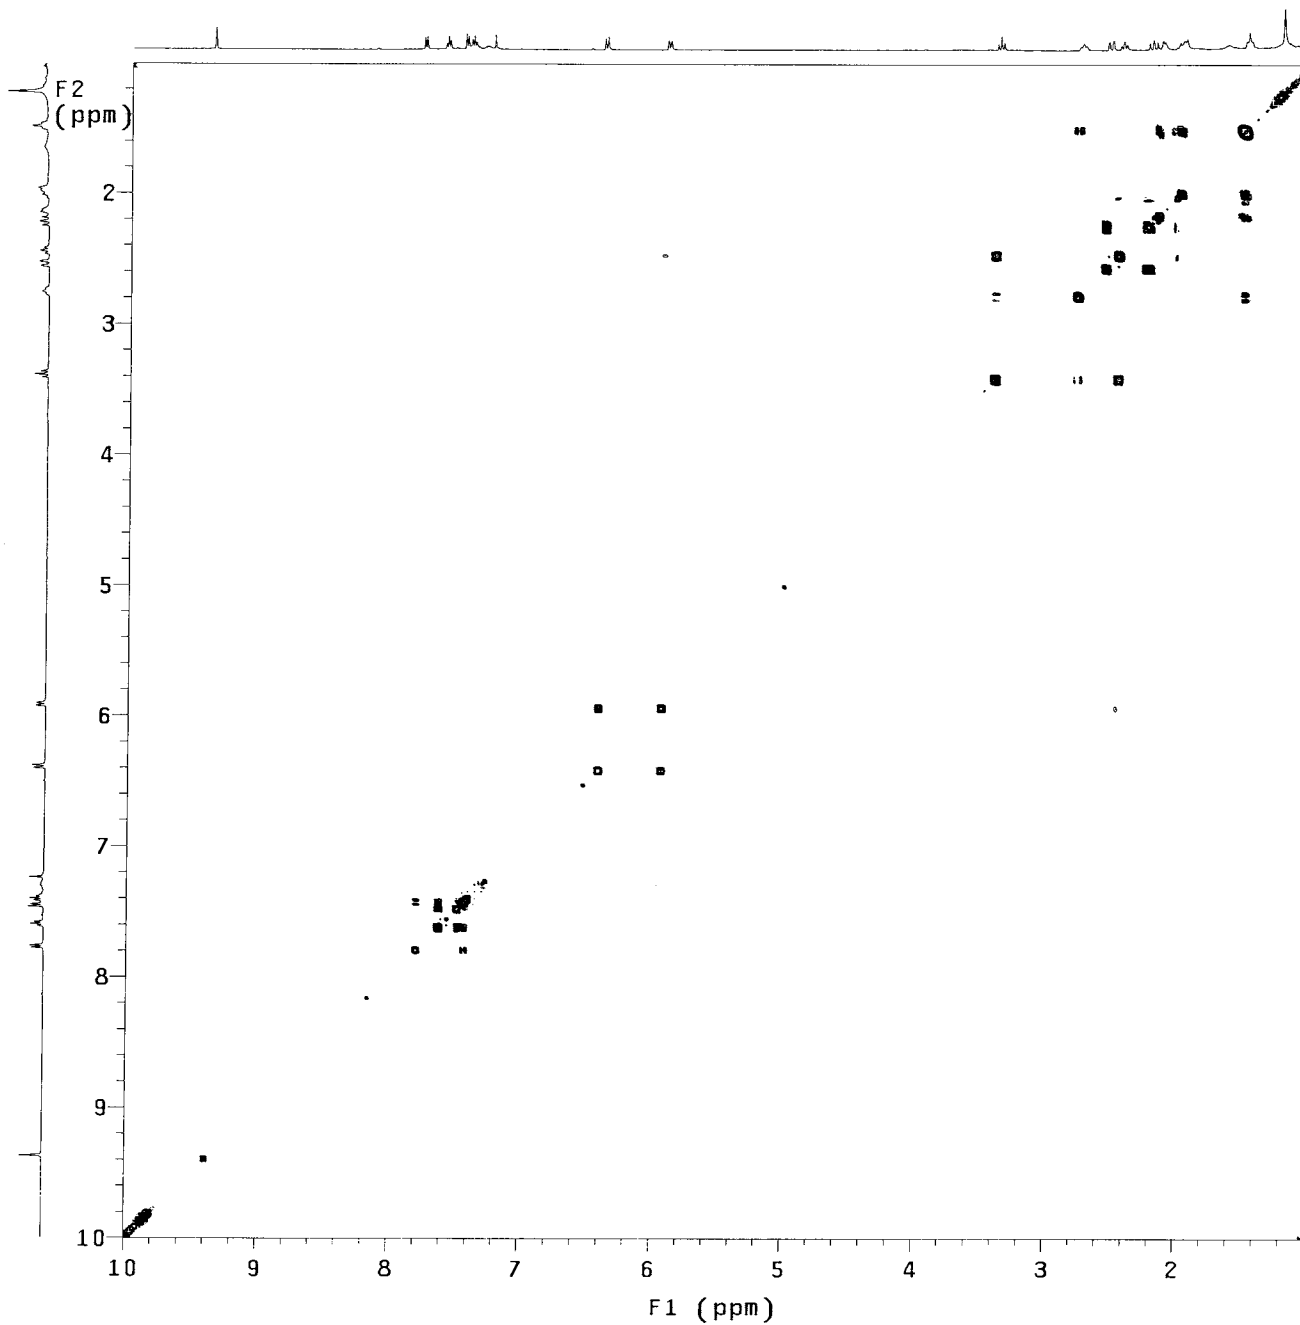

Fig S51. HMQC of 5f (CDCl3).

RYN-2-133

exp34 gHMQC

| SAMPLE           | FLAGS         | ACQUISITION | ARRAYS |
|------------------|---------------|-------------|--------|
| date Nov 6 2008  | hs            | n           | phase  |
| solvent cdc13    | sspul         | array       | 256    |
| sample undefined | PFGflg        | arraydim    |        |
| ACQUISITION      | hsglvl        | 1026        | phase  |
| sw 4498.4        | SPECIAL       | 1           | 1      |
| at 0.228         | temp          | not used    | 2      |
| np 2048          | gain          | 28          |        |
| fb 3000          | spin          | 0           |        |
| ss 32            | GRADIENTS     |             |        |
| d1 1.000         | gzlvl1        | 1026        |        |
| nt 16            | gt1           | 0.001000    |        |
| 2D ACQUISITION   | gzlvl3        | 516         |        |
| sw1 21367.5      | gt3           | 0.001000    |        |
| ni 128           | gstab         | 0.000500    |        |
| phase arrayed    | F2 PROCESSING |             |        |
| TRANSMITTER      | gf            | 0.105       |        |
| tn H1            | gfs           | not used    |        |
| sfrq 499.836     | fn            | 2048        |        |
| tof 249.8        | F1 PROCESSING |             |        |
| tpwr 57          | gf1           | 0.006       |        |
| pw 13.000        | gfs1          | not used    |        |
| DECOUPLER        | proc1         | lp          |        |
| dn C13           | fni           | 2048        |        |
| dof -2515.1      | DISPLAY       |             |        |
| dm nny           | sp            | 785.4       |        |
| dmm ccp          | wp            | 3395.8      |        |
| dmf 32258        | sp1           | 2832.4      |        |
| dpwr 35          | wp1           | 15420.5     |        |
| pwxlvl 51        | rfl           | -499.8      |        |
| pwx 14.700       | rfp           | 0           |        |
| HMQC             | rfl1          | 1257.5      |        |
| j1xh 140.0       | rfp1          | 0           |        |
| nullflg y        | PLOT          |             |        |
|                  | wc            | 150.0       |        |
|                  | sc            | 6.2         |        |
|                  | wc2           | 116.2       |        |
|                  | sc2           | 0           |        |
|                  | vs            | 1814        |        |
|                  | th            | 6           |        |
|                  | ai            | cdc         | ph     |

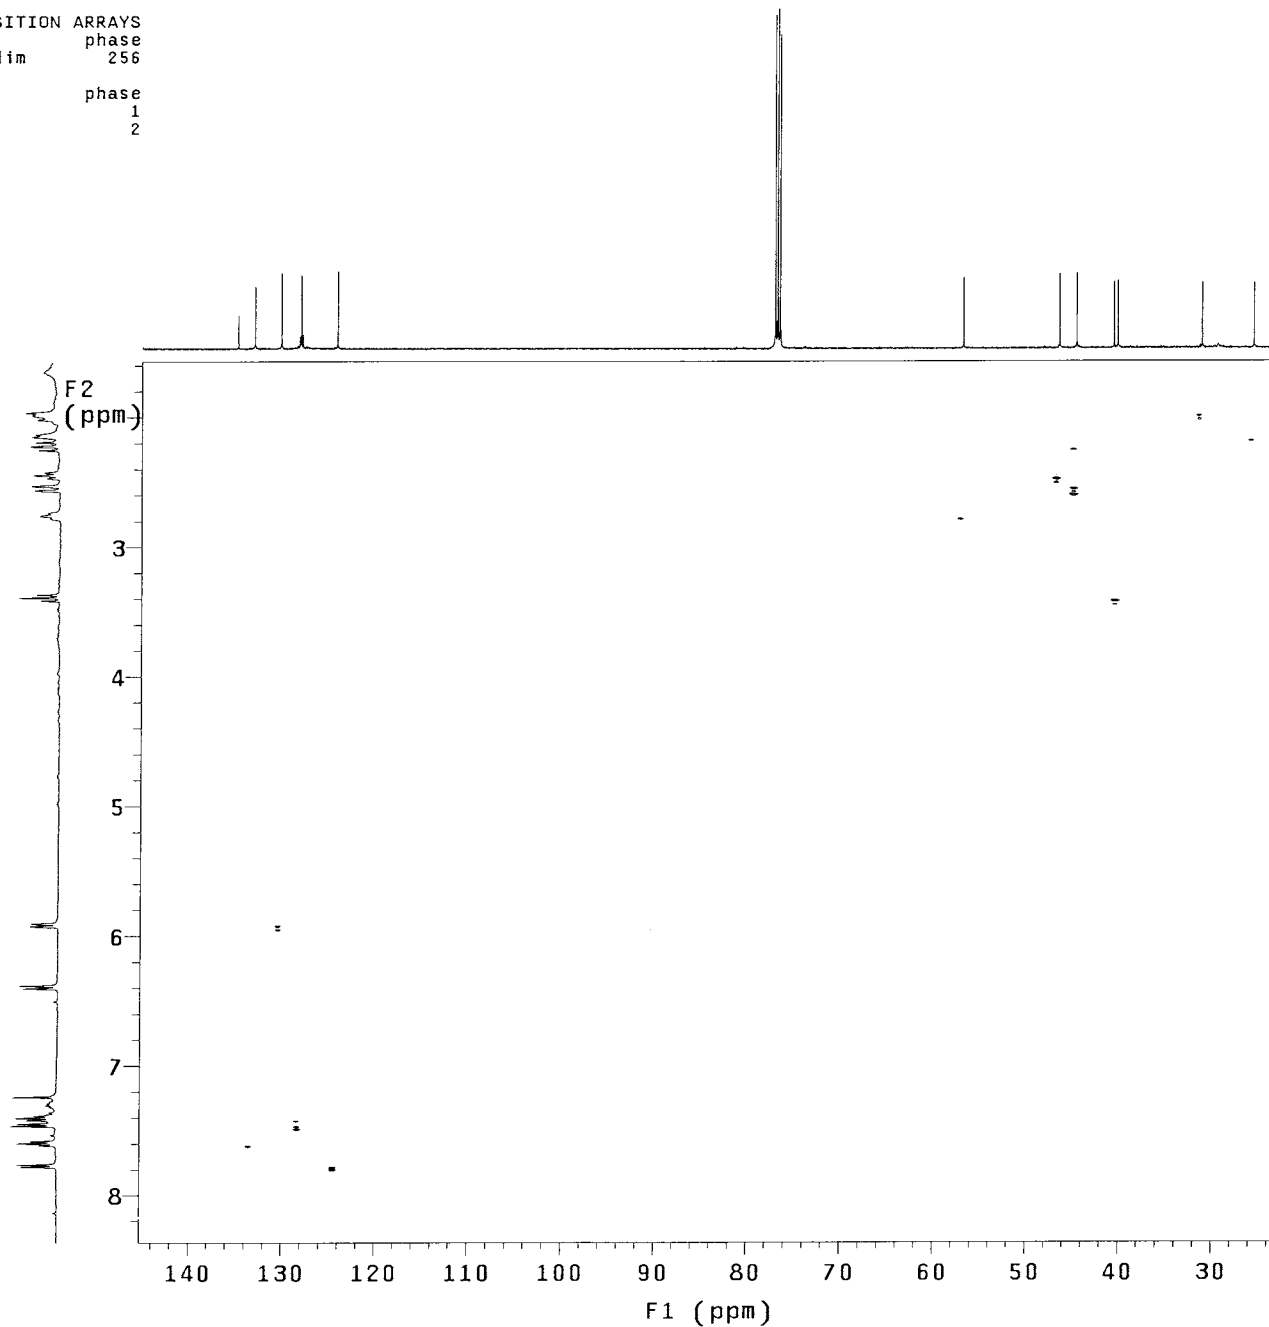

Fig S52. NOESY of 5f (CDCl3).

RYN-2-133

exp35 NOESY

|                |            |               |          |
|----------------|------------|---------------|----------|
| SAMPLE         |            | FLAGS         |          |
| date           | Nov 6 2008 | hs            | n        |
| solvent        | cdcl3      | sspul         | y        |
| sample         | undefined  | PFGflg        | y        |
| ACQUISITION    |            | hsglvi        | 1026     |
| sw             | 4498.4     | SPECIAL       |          |
| at             | 0.228      | temp          | not used |
| np             | 2048       | gain          | 20       |
| fb             | 3000       | spin          | 0        |
| ss             | 32         | F2 PROCESSING |          |
| d1             | 1.000      | gf            | 0.105    |
| nt             | 8          | gfs           | not used |
| 2D ACQUISITION |            | fn            | 2048     |
| sw1            | 4498.4     | F1 PROCESSING |          |
| ni             | 200        | gf1           | 0.041    |
| TRANSMITTER    |            | gfs1          | not used |
| tn             | H1         | procl         | lp       |
| sfrq           | 499.836    | fn1           | 2048     |
| tof            | 249.8      | DISPLAY       |          |
| tpwr           | 57         | sp            | 504.2    |
| pw             | 13.000     | wp            | 4494.0   |
| NOESY          |            | sp1           | 504.2    |
| mix            | 0.600      | wp1           | 4494.0   |
| PRESATURATION  |            | rfl           | -499.8   |
| satmode        | nnnn       | rfp           | 0        |
| satpwr         | 0          | rfl1          | -499.8   |
| satdly         | 0          | rfp1          | 0        |
| satfrq         | 0          | PLOT          |          |
| DECOUPLER      |            | wc            | 155.0    |
| dn             | C13        | sc            | 10.0     |
| dm             | nnn        | wc2           | 155.0    |
|                |            | sc2           | 0        |
|                |            | vs            | 1814     |
|                |            | th            | 4        |
|                |            | ai            | ph       |

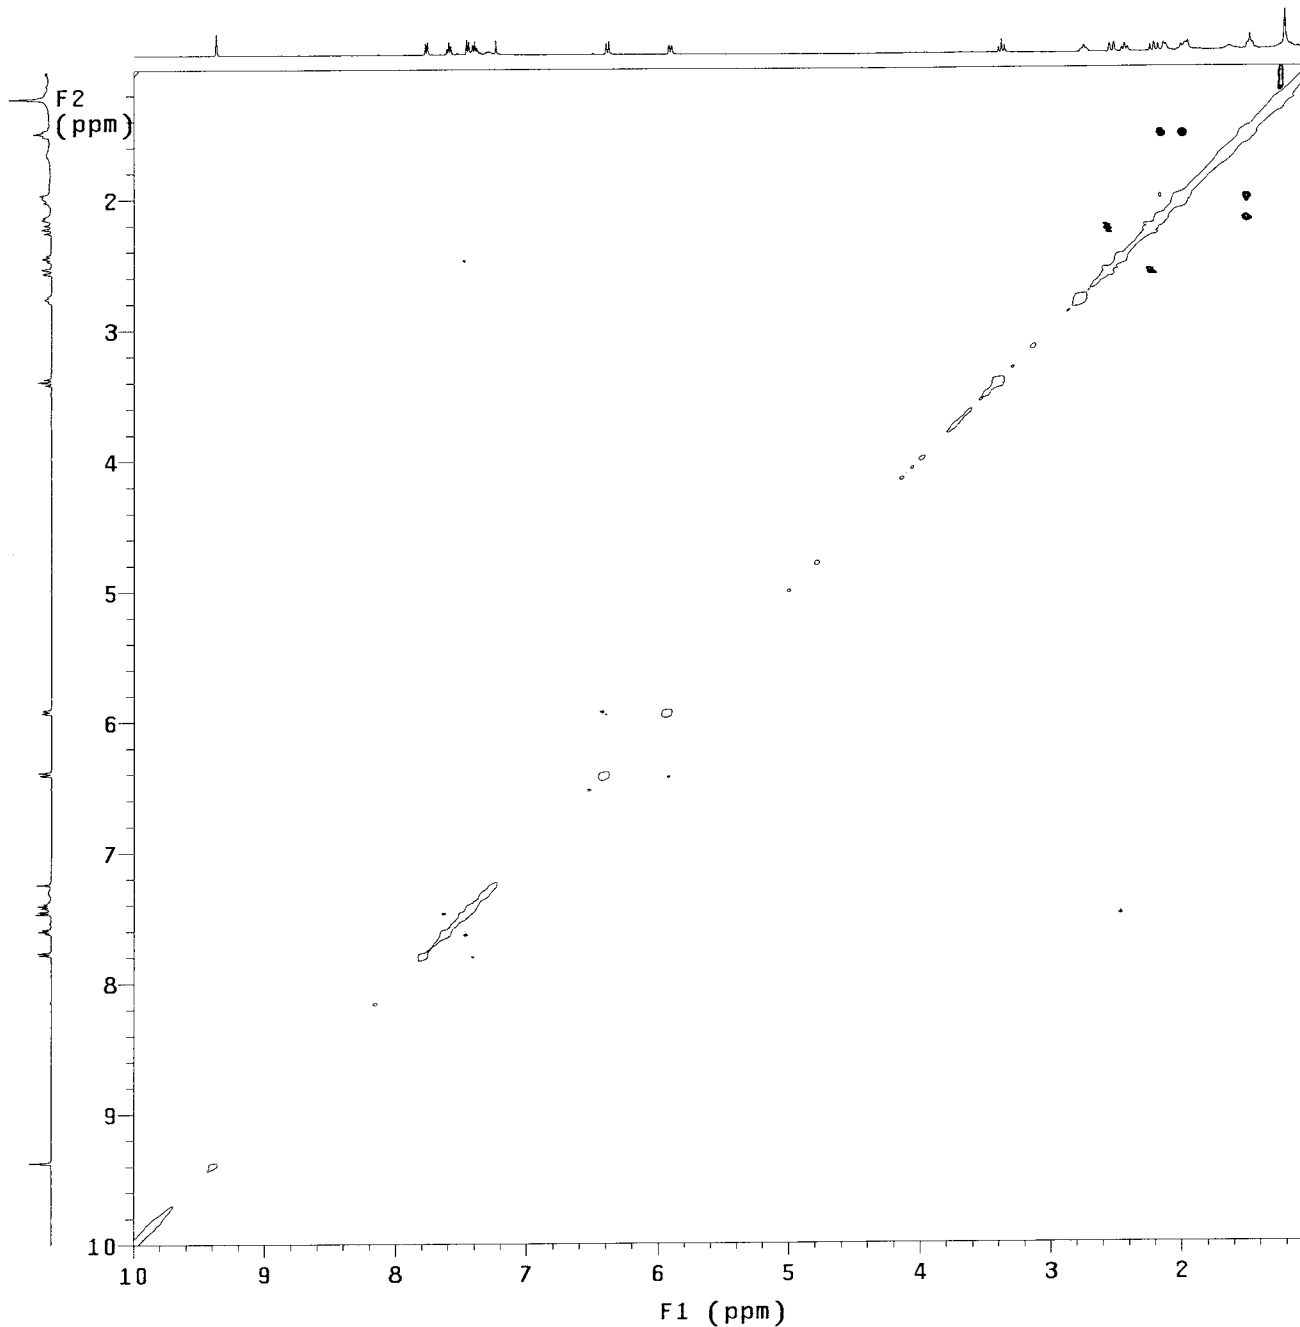

Fig S53. <sup>1</sup>H NMR of 5g (500 MHz, CDCl<sub>3</sub>).

RYN-2-138

exp21 s2pu1

|             |             |            |          |
|-------------|-------------|------------|----------|
| SAMPLE      |             | DEC. & VT  |          |
| date        | Nov 15 2008 | dfrq       | 125.695  |
| solvent     | cdcl3       | dn         | C13      |
| file        | exp         | dpwr       | 30       |
| ACQUISITION |             | dof        | 0        |
| sfrq        | 499.836     | dm         | nnn      |
| tn          | H1          | dmm        | c        |
| at          | 3.000       | dmf        | 200      |
| np          | 48000       | dseq       |          |
| sw          | 8000.0      | dres       | 1.0      |
| fb          | 4000        | homo       | n        |
| bs          | 4           | PROCESSING |          |
| tpwr        | 57          | wfile      |          |
| pw          | 4.8         | proc       | ft       |
| d1          | 1.000       | fn         | not used |
| tof         | 499.7       | math       | f        |
| nt          | 4           |            |          |
| ct          | 4           | werr       | react    |
| alock       | y           | wexp       | procplot |
| gain        | not used    | wbs        |          |
| FLAGS       |             | wnt        | wft      |
| il          | n           |            |          |
| in          | n           |            |          |
| dp          | y           |            |          |
| hs          | nn          |            |          |
| DISPLAY     |             |            |          |
| sp          | -250.1      |            |          |
| wp          | 5498.0      |            |          |
| vs          | 28          |            |          |
| sc          | 0           |            |          |
| wc          | 210         |            |          |
| hzmm        | 26.18       |            |          |
| is          | 119.13      |            |          |
| rfl         | 4631.8      |            |          |
| rfp         | 3618.8      |            |          |
| th          | 6           |            |          |
| ins         | 100.000     |            |          |
| nm          | ph          |            |          |

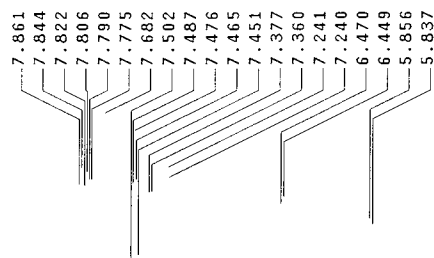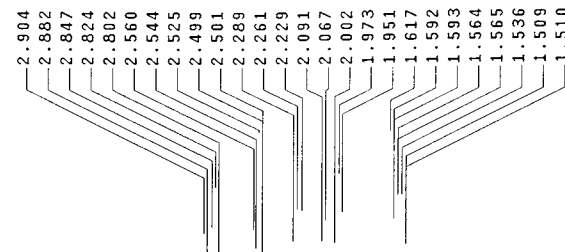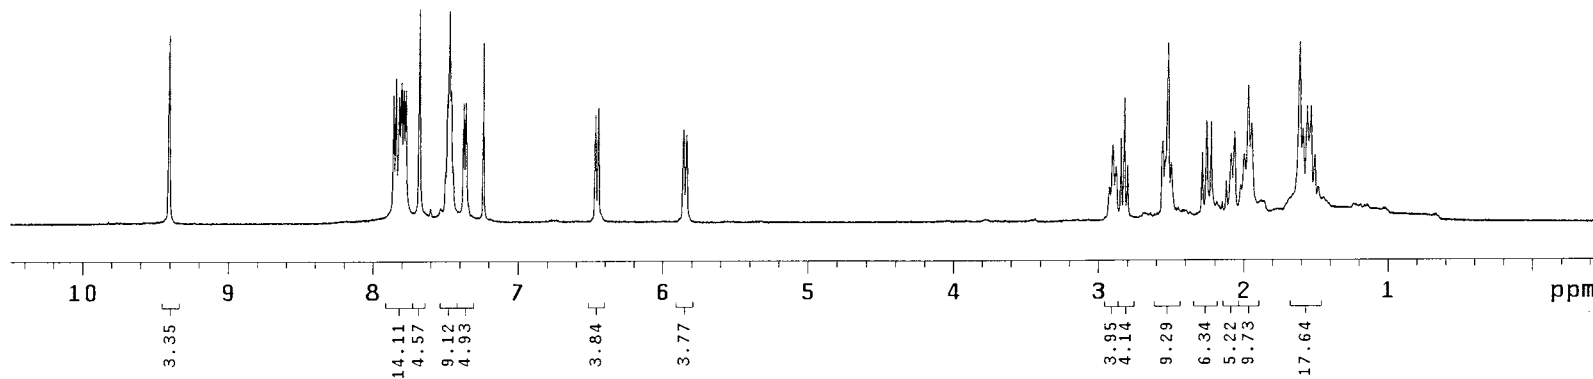

RYN-2-138  
 exp22 s2pu1  
 SAMPLE  
 date Nov 15 2008 dfrq 499.836  
 solvent cdcl3 dn H1  
 file exp dpwr 39  
 ACQUISITION dof 0  
 sfrq 125.698 dm yyy  
 tn C13 dmm w  
 at 1.000 dmf 11905  
 np 62894 dseq  
 sw 31446.5 dres 1.0  
 fb 17000 homo n  
 bs 16 PROCESSING  
 ss 2 lb 1.00  
 tpwr 54 wtfile  
 pw 4.0 proc ft  
 d1 1.000 fn not used  
 tof 2512.2 math f  
 nt 20000  
 ct 20000 werr react  
 alock y wexp procplot  
 gain not used wbs testsn  
 wnt  
 FLAGS  
 il n  
 in n  
 dp y  
 hs nn  
 DISPLAY  
 sp -1256.9  
 wp 27650.1  
 vs 322  
 sc 0  
 wc 210  
 hzmm 131.67  
 is 500.00  
 rfl 10981.5  
 rfp 9677.6  
 th 5  
 ins 100.000  
 nm ph

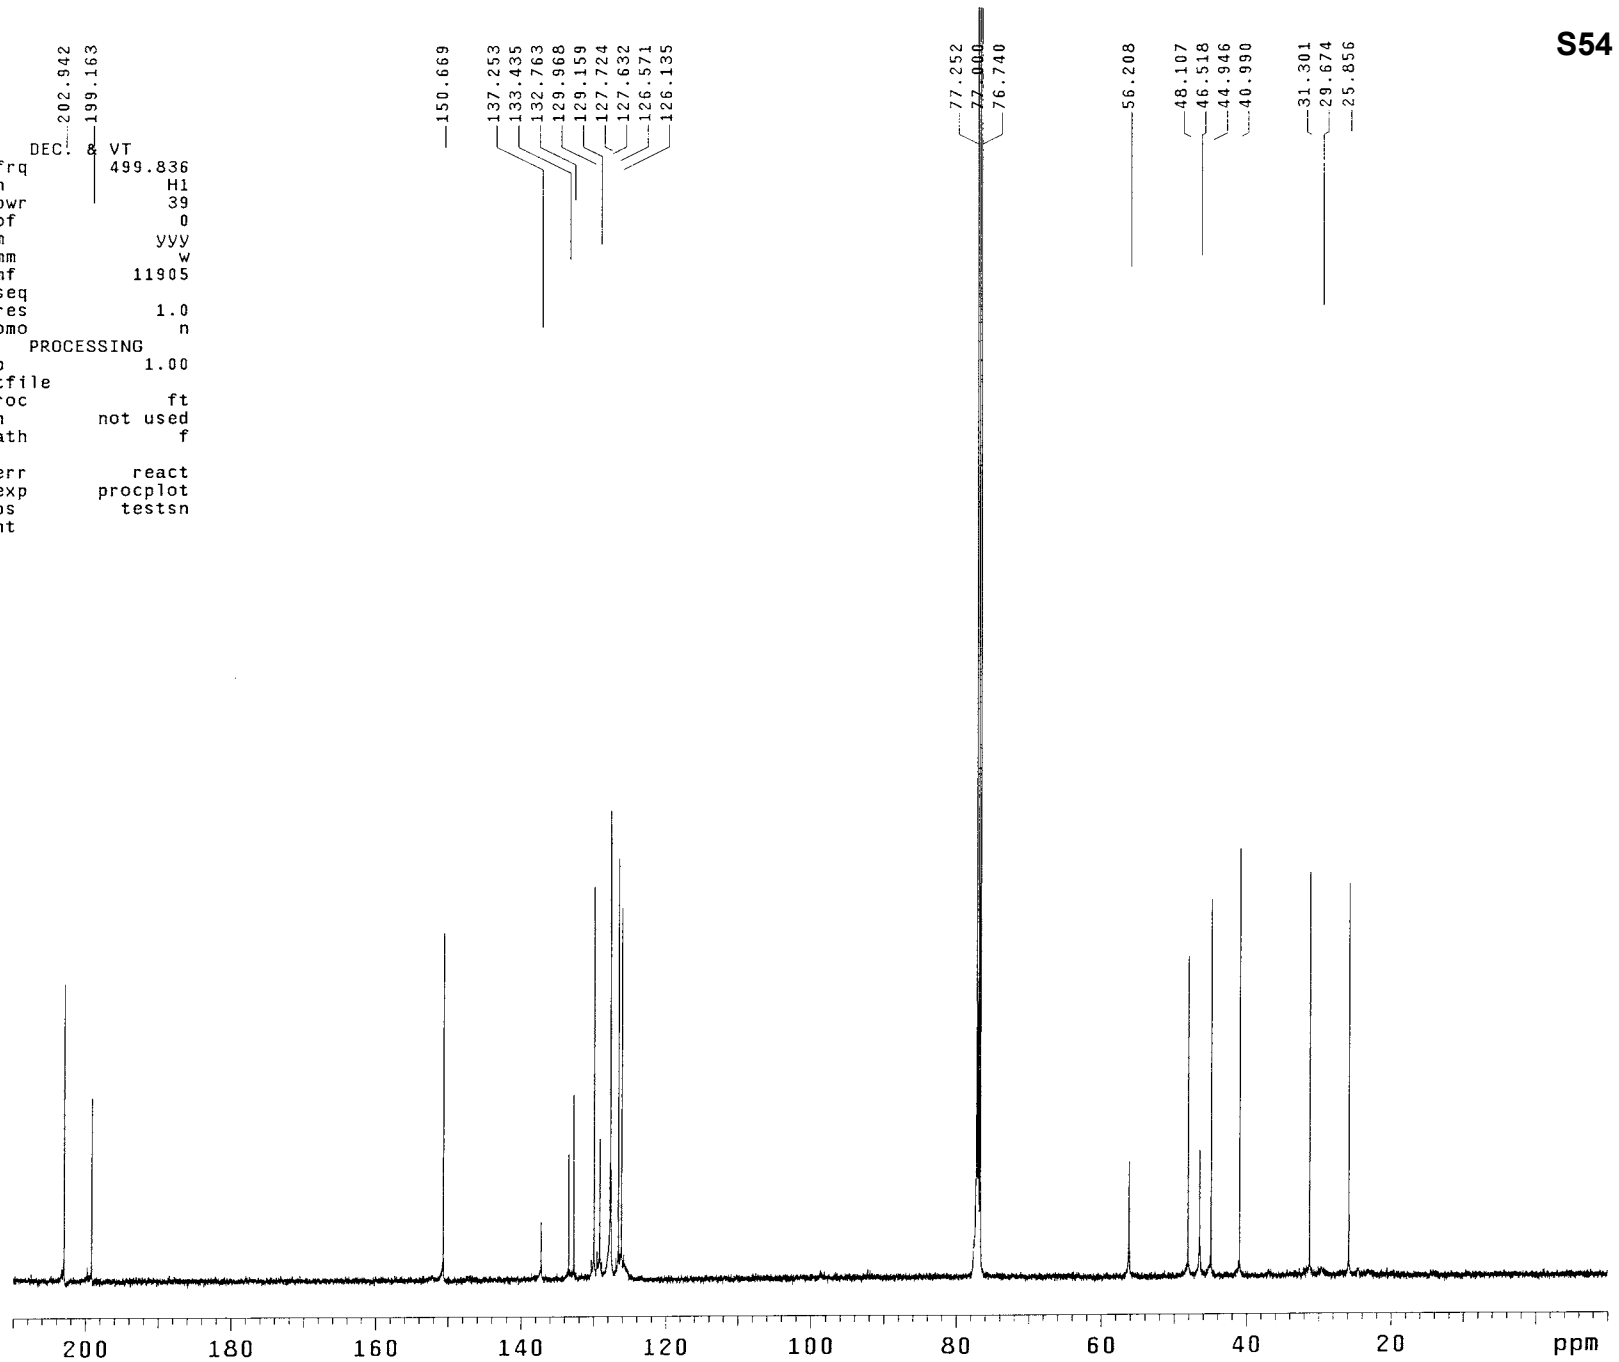

Fig S54.  $^{13}\text{C}$  NMR of 5g (125 MHz,  $\text{CDCl}_3$ ).

Fig S55. DEPT of 5g (CDCl<sub>3</sub>).

RYN-2-138

exp23 DEPT

|         |             |            |          |          |             |        |
|---------|-------------|------------|----------|----------|-------------|--------|
| date    | Nov 15 2008 | j1xh       | DEPT     | 140.0    | ACQUISITION | ARRAYS |
| solvent | cdc13       | mult       | arrayed  |          | array       | mult   |
| sample  | undefined   |            | arraydim |          | arraydim    | 3      |
|         | ACQUISITION | temp       | SPECIAL  | not used | i           | mult   |
| sw      | 31446.5     | gain       |          | 56       | 1           | 0.5    |
| at      | 1.000       | spin       |          | 0        | 2           | 1      |
| np      | 62894       | PROCESSING |          | 3        | 3           | 1.5    |
| bs      | 16          | lb         |          | 1.00     |             |        |
| ss      | -4          | fn         |          | not used |             |        |
| di      | 1.000       | SPECTRUM   |          |          |             |        |
| nt      | 3000        | wp         |          | 27650.1  |             |        |
| ct      | 3000        | sp         |          | -1257.2  |             |        |
|         | TRANSMITTER | rp         |          | 31.7     |             |        |
| tn      | C13         | lp         |          | 25.8     |             |        |
| tof     | 2512.2      | ai         | cdc ph   |          |             |        |
| tpwr    | 54          | REFERENCE  |          |          |             |        |
| pw      | 9.400       | rfl        |          | 1269.7   |             |        |
|         | DECOUPLER   | rfp        |          | 0        |             |        |
| dn      | H1          | PLOT       |          |          |             |        |
| dof     | 0           | wc         |          | 210      |             |        |
| dpwr    | 39          | sc         |          | 0        |             |        |
| dm      | nny         | vs         |          | 532      |             |        |
| dmm     | ccw         | hzmm       |          | 131.67   |             |        |
| dmf     | 11905       | th         |          | 68       |             |        |
| pp1v1   | 49          |            |          |          |             |        |
| pp      | 29.400      |            |          |          |             |        |

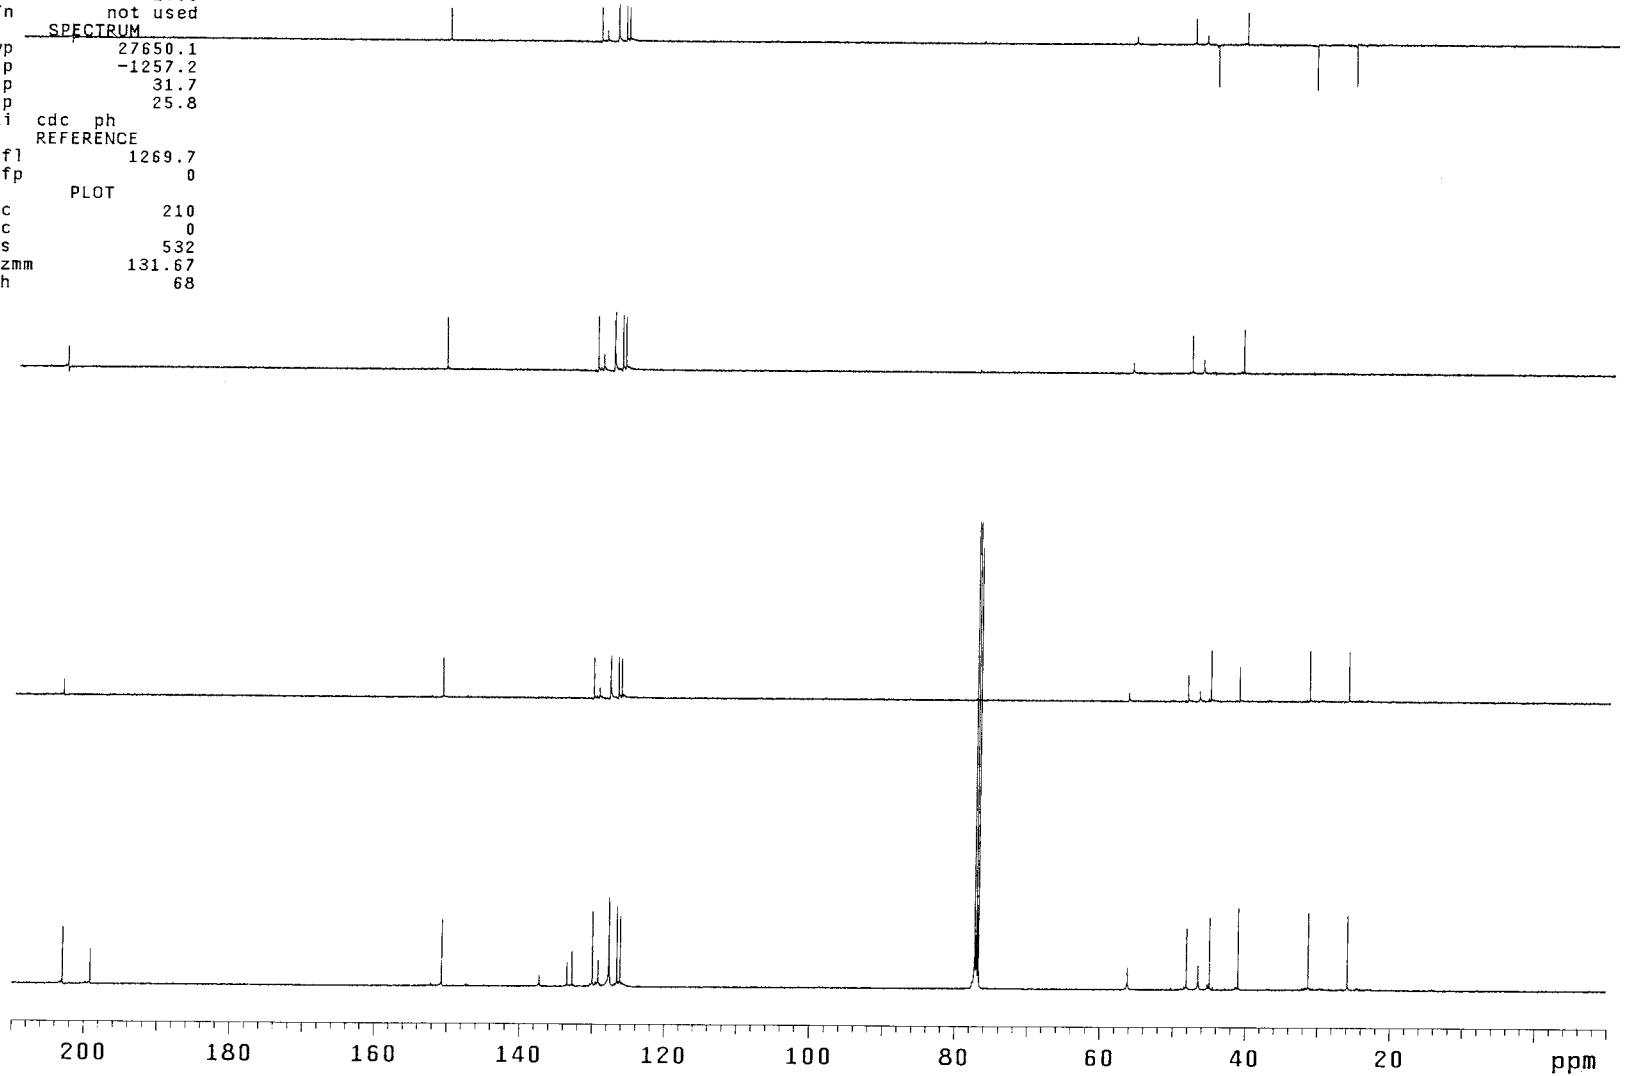

Fig S56. COSY of 5g (CDCl<sub>3</sub>).

RYN-2-138

exp27 gCOSY

| SAMPLE         |             | FLAGS         |          |
|----------------|-------------|---------------|----------|
| date           | Nov 17 2008 | hs            | nn       |
| solvent        | cdcl3       | sspul         | n        |
| sample         | undefined   | hsglv1        | 1026     |
| ACQUISITION    |             | SPECIAL       |          |
| sw             | 4498.4      | temp          | not used |
| at             | 0.228       | gain          | 30       |
| np             | 2048        | spin          | 0        |
| fb             | 3000        | F2 PROCESSING |          |
| ss             | 16          | sb            | -0.114   |
| d1             | 1.000       | sbs           | not used |
| nt             | 16          | fn            | 2048     |
| 2D ACQUISITION |             | F1 PROCESSING |          |
| sw1            | 4498.4      | sb1           | -0.028   |
| ni             | 128         | sbs1          | not used |
| TRANSMITTER    |             | proc1         | lp       |
| tn             | H1          | fn1           | 2048     |
| sfrq           | 499.836     | DISPLAY       |          |
| tof            | 249.8       | sp            | 486.0    |
| tpwr           | 57          | wp            | 4494.0   |
| pw             | 13.000      | sp1           | 489.2    |
| GRADIENTS      |             | wp1           | 4494.0   |
| gzlv11         | 1026        | rfl           | 2437.4   |
| gt1            | 0.001000    | rfp           | 2919.0   |
| gstab          | 0.000500    | rfl1          | 2434.2   |
| DECOUPLER      |             | rfpl          | 2919.0   |
| dn             | C13         | PLOT          |          |
| dm             | nnn         | wc            | 155.0    |
|                |             | sc            | 10.0     |
|                |             | wc2           | 155.0    |
|                |             | sc2           | 0        |
|                |             | vs            | 18       |
|                |             | th            | 8        |
|                |             | ai            | cdc av   |

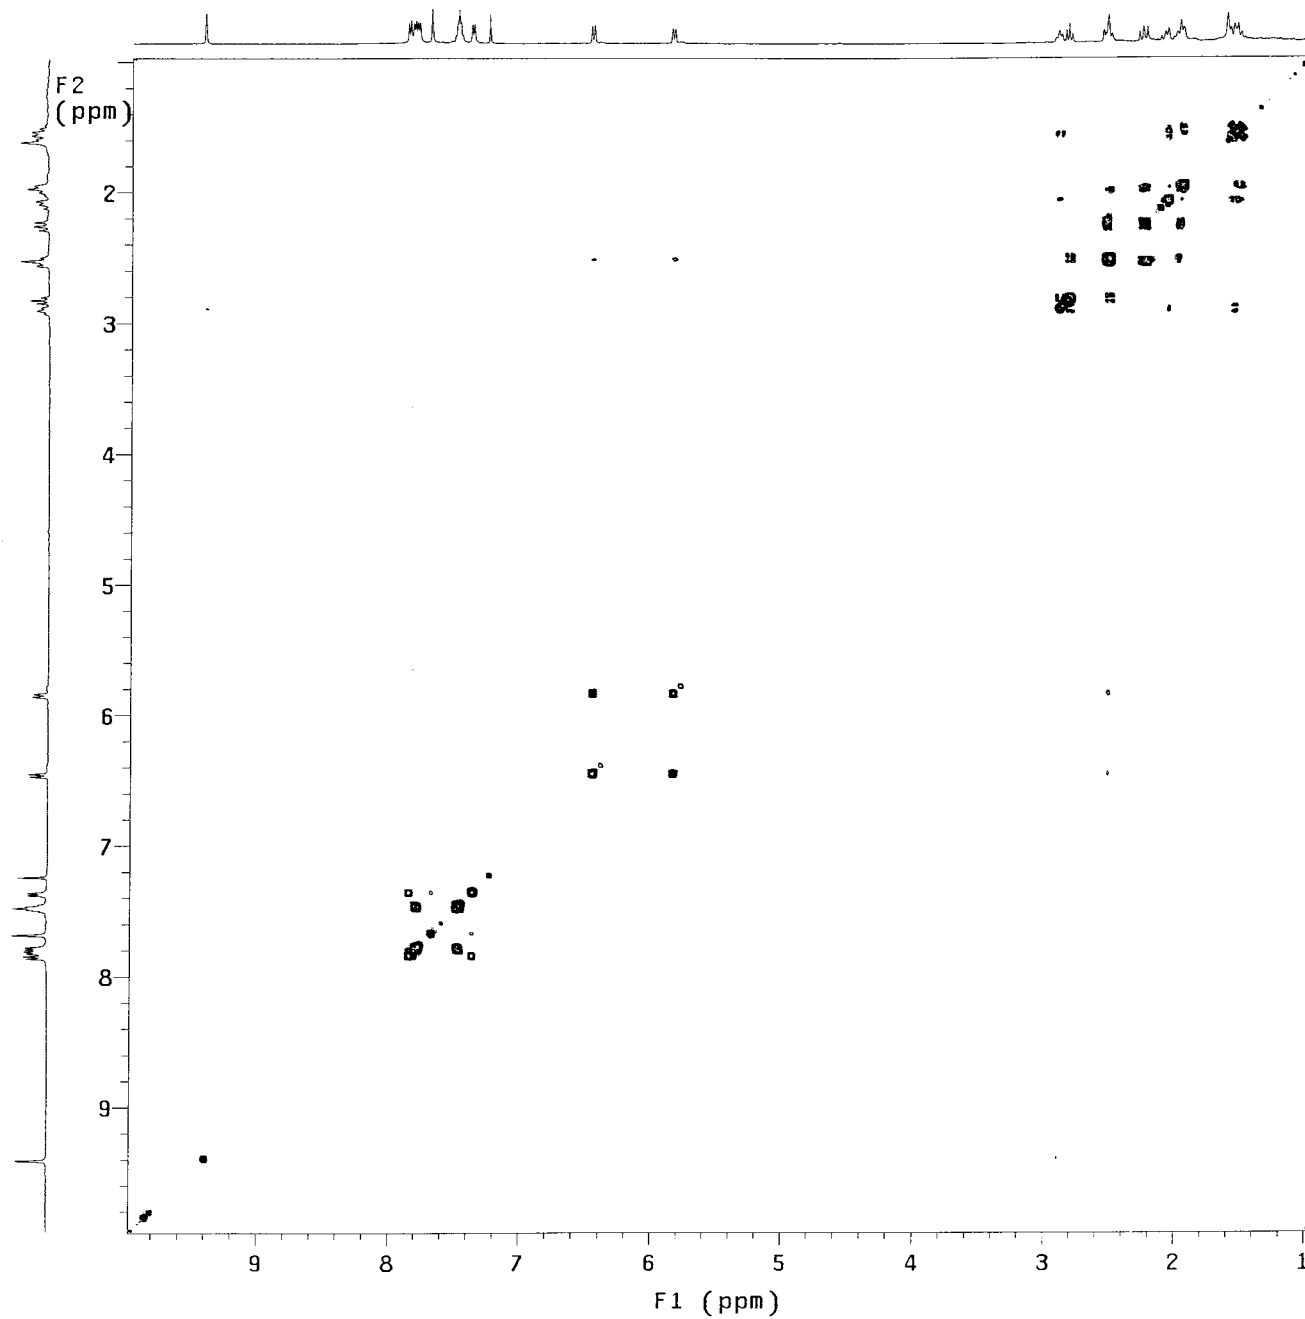



RYN-2-138

Fig S57. HMQC of 5g (CDCl3).

exp26 gHMQC

| SAMPLE         |             | FLAGS         | ACQUISITION | ARRAYS   |
|----------------|-------------|---------------|-------------|----------|
| date           | Nov 15 2008 | hs            | n           | array    |
| solvent        | cdcl3       | sspul         | y           | phase    |
| sample         | undefined   | PFGflg        | y           | arraydim |
| ACQUISITION    | hsglv1      | 1026          | i           | phase    |
| sw             | 4498.4      | SPECIAL       | 1           | 1        |
| at             | 0.228       | temp          | not used    | 2        |
| np             | 2048        | gain          | 30          |          |
| fb             | 3000        | spin          | 0           |          |
| ss             | 32          | GRADIENTS     |             |          |
| d1             | 1.000       | gzlv11        | 1026        |          |
| nt             | 16          | gt1           | 0.001000    |          |
| 2D ACQUISITION | gzlv13      | 516           |             |          |
| sw1            | 21367.5     | gt3           | 0.001000    |          |
| ni             | 128         | gstab         | 0.000500    |          |
| phase          | arrayed     | F2 PROCESSING |             |          |
| TRANSMITTER    | gf          | 0.105         |             |          |
| tn             | H1          | gfs           | not used    |          |
| sfrq           | 499.836     | fn            | 2048        |          |
| tof            | 249.8       | F1 PROCESSING |             |          |
| tpwr           | 57          | gf1           | 0.006       |          |
| pw             | 13.000      | gfs1          | not used    |          |
| DECOUPLER      | proc1       | 1p            |             |          |
| dn             | C13         | fn1           | 2048        |          |
| dof            | -2515.1     | DISPLAY       |             |          |
| dm             | nny         | sp            | 512.9       |          |
| dmm            | ccp         | wp            | 3769.2      |          |
| dmf            | 32258       | sp1           | 2149.6      |          |
| dpwr           | 35          | wp1           | 17173.3     |          |
| pxlv1          | 51          | rfl           | 2742.4      |          |
| pxw            | 14.700      | rfp           | 3228.9      |          |
| HMQC           | rfl1        | 20230.0       |             |          |
| j1xh           | 140.0       | rfp1          | 18936.6     |          |
| nullfig        | y           | PLOT          |             |          |
|                | wc          | 150.0         |             |          |
|                | sc          | 6.2           |             |          |
|                | wc2         | 116.2         |             |          |
|                | sc2         | 0             |             |          |
|                | vs          | 113           |             |          |
|                | th          | 6             |             |          |
|                | ai          | cdc           | ph          |          |

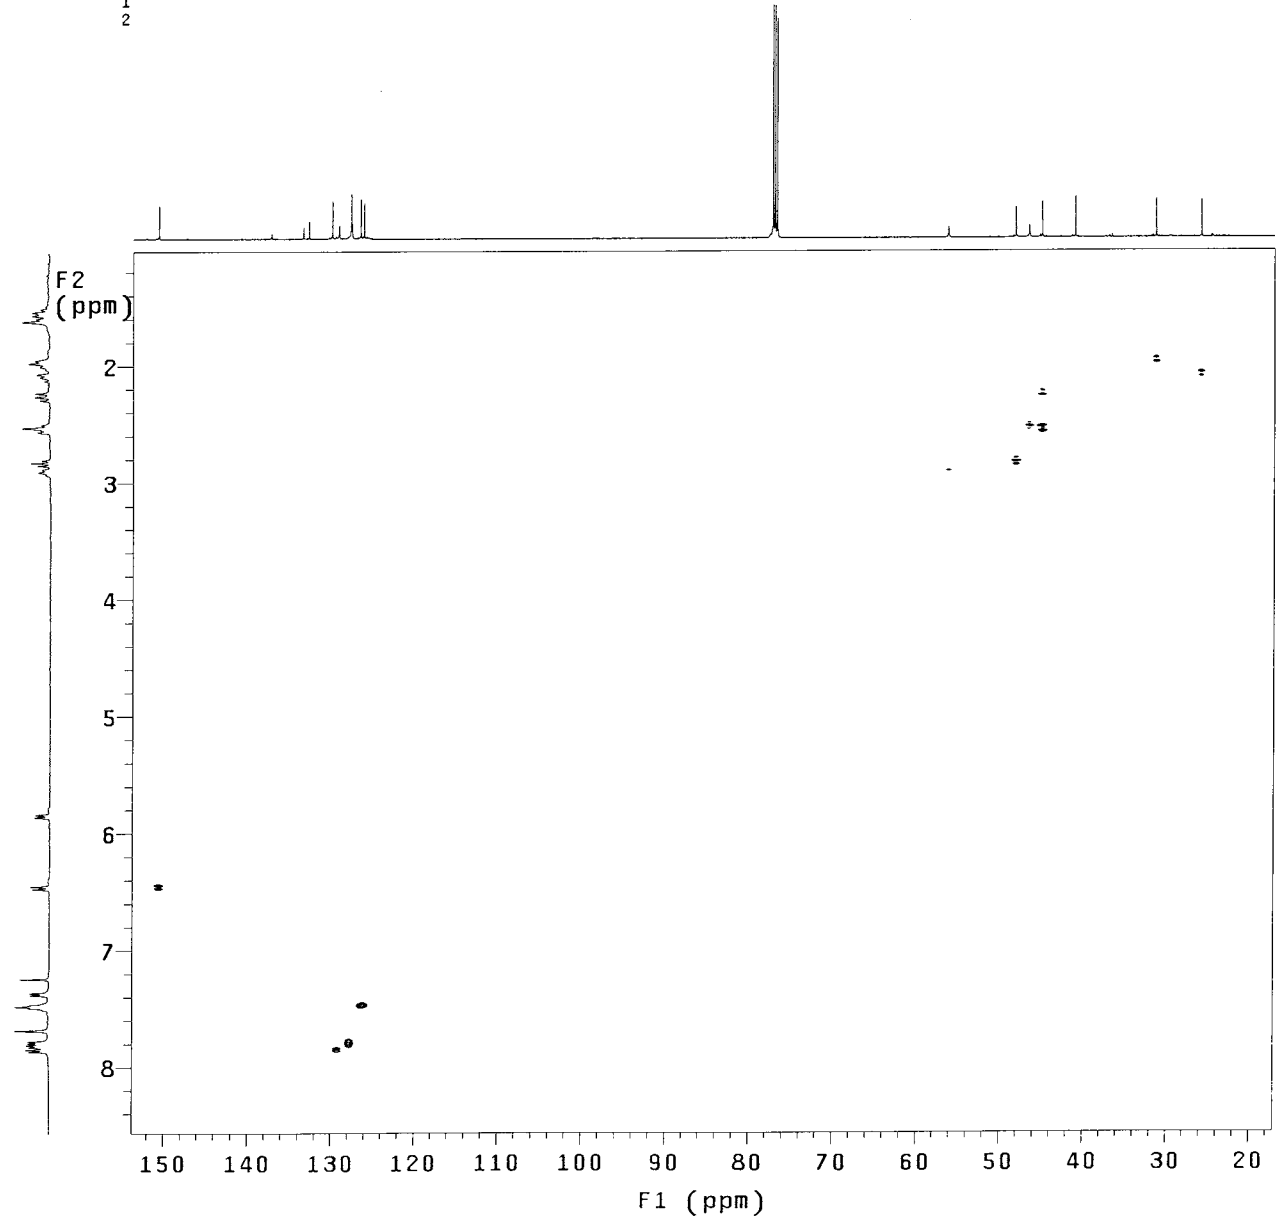

Fig S58. NOESY of 5g (CDCl3).

RYN-2-138

exp24 NOESY

| SAMPLE         |             | FLAGS         |          |
|----------------|-------------|---------------|----------|
| date           | Nov 15 2008 | hs            | n        |
| solvent        | cdcl3       | sspul         | y        |
| sample         | undefined   | PFGflg        | v        |
| ACQUISITION    |             | hsglvi        | 1026     |
| sw             | 4498.4      | SPECIAL       |          |
| at             | 0.228       | temp          | not used |
| np             | 2048        | gain          | 50       |
| fb             | 3000        | spin          | 0        |
| ss             | 32          | F2 PROCESSING |          |
| d1             | 1.000       | gf            | 0.105    |
| nt             | 8           | gfs           | not used |
| 2D ACQUISITION |             | fn            | 2048     |
| sw1            | 4498.4      | F1 PROCESSING |          |
| ni             | 200         | gf1           | 0.041    |
| TRANSMITTER    |             | gfs1          | not used |
| tn             | H1          | procl         | lp       |
| sfrq           | 499.836     | fn1           | 2048     |
| tof            | 249.8       | DISPLAY       |          |
| tpwr           | 57          | sp            | 489.7    |
| pw             | 13.000      | wp            | 4494.0   |
| NOESY          |             | sp1           | 504.2    |
| mix            | 0.200       | wp1           | 4494.0   |
| PRESATURATION  |             | rfl           | 2433.7   |
| satmode        | nnnn        | rfp           | 2919.0   |
| satpwr         | 0           | rfl1          | -499.8   |
| satdly         | 0           | rfp1          | 0        |
| satfrq         | 0           | PLOT          |          |
| DECOUPLER      |             | wc            | 155.0    |
| dn             | C13         | sc            | 10.0     |
| dm             | nnn         | wc2           | 155.0    |
|                |             | sc2           | 0        |
|                |             | vs            | 1814     |
|                |             | th            | 4        |
|                |             | ai            | ph       |

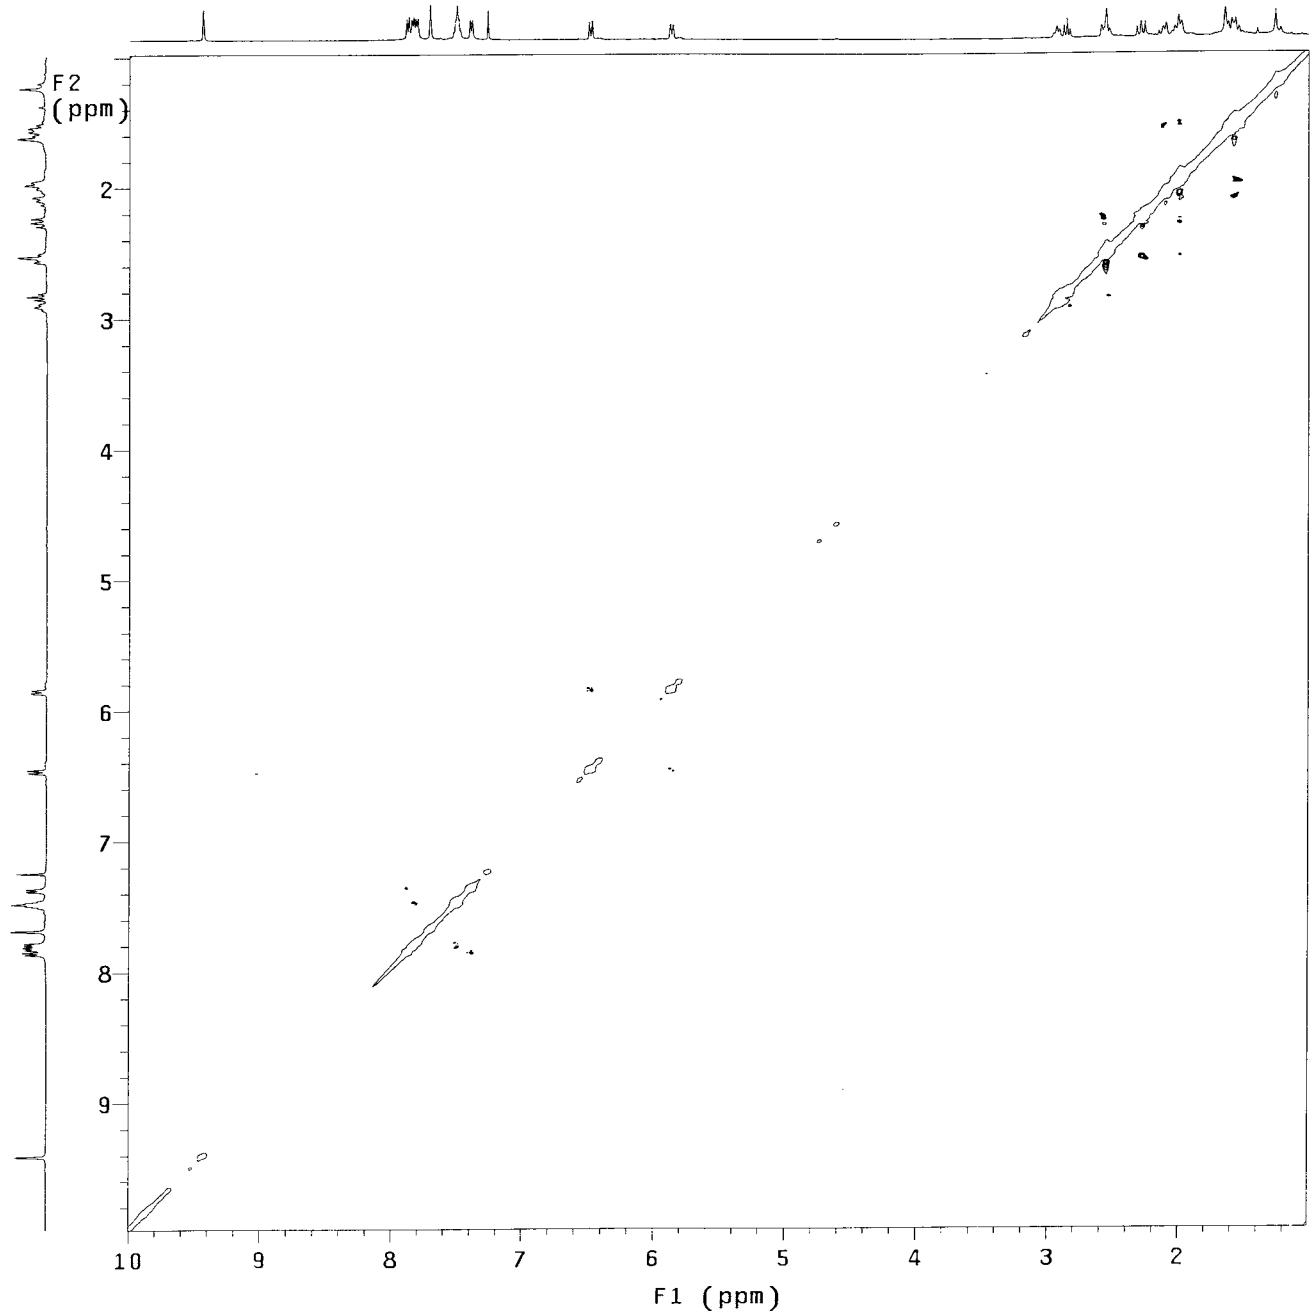

Fig S59. <sup>1</sup>H NMR of 5h (500 MHz, CDCl<sub>3</sub>).

```

RYN-2-140
expl2  s2pu1
SAMPLE
date   Nov 15 2008  dfrq   125.695
solvent cdcl3      dn     C13
file    exp       dpwr   30
ACQUISITION
sfrq    499.836   dm     nnn
tn      H1       dmm   c
at      3.000    dmf   200
np      48000    dseq
sw      8000.0   dres   1.0
fb      4000    homo  n
bs      4
PROCESSING
tpwr    57      wfile
pw      4.8     proc   ft
d1      1.000   fn     not used
tof     499.7   math  f
nt      4
ct      4      werr   react
alock   y      wexp   procplot
gain    not used
wbs
wnt
wft
FLAGS
il      n
in      n
dp      y
hs      nn
DISPLAY
sp      -250.1
wp      5498.0
vs      57
sc      0
wc      210
hzmm    26.18
is      99.82
rfl     4634.8
rfp     3618.8
th      3
ins     100.000
nm      ph
    
```

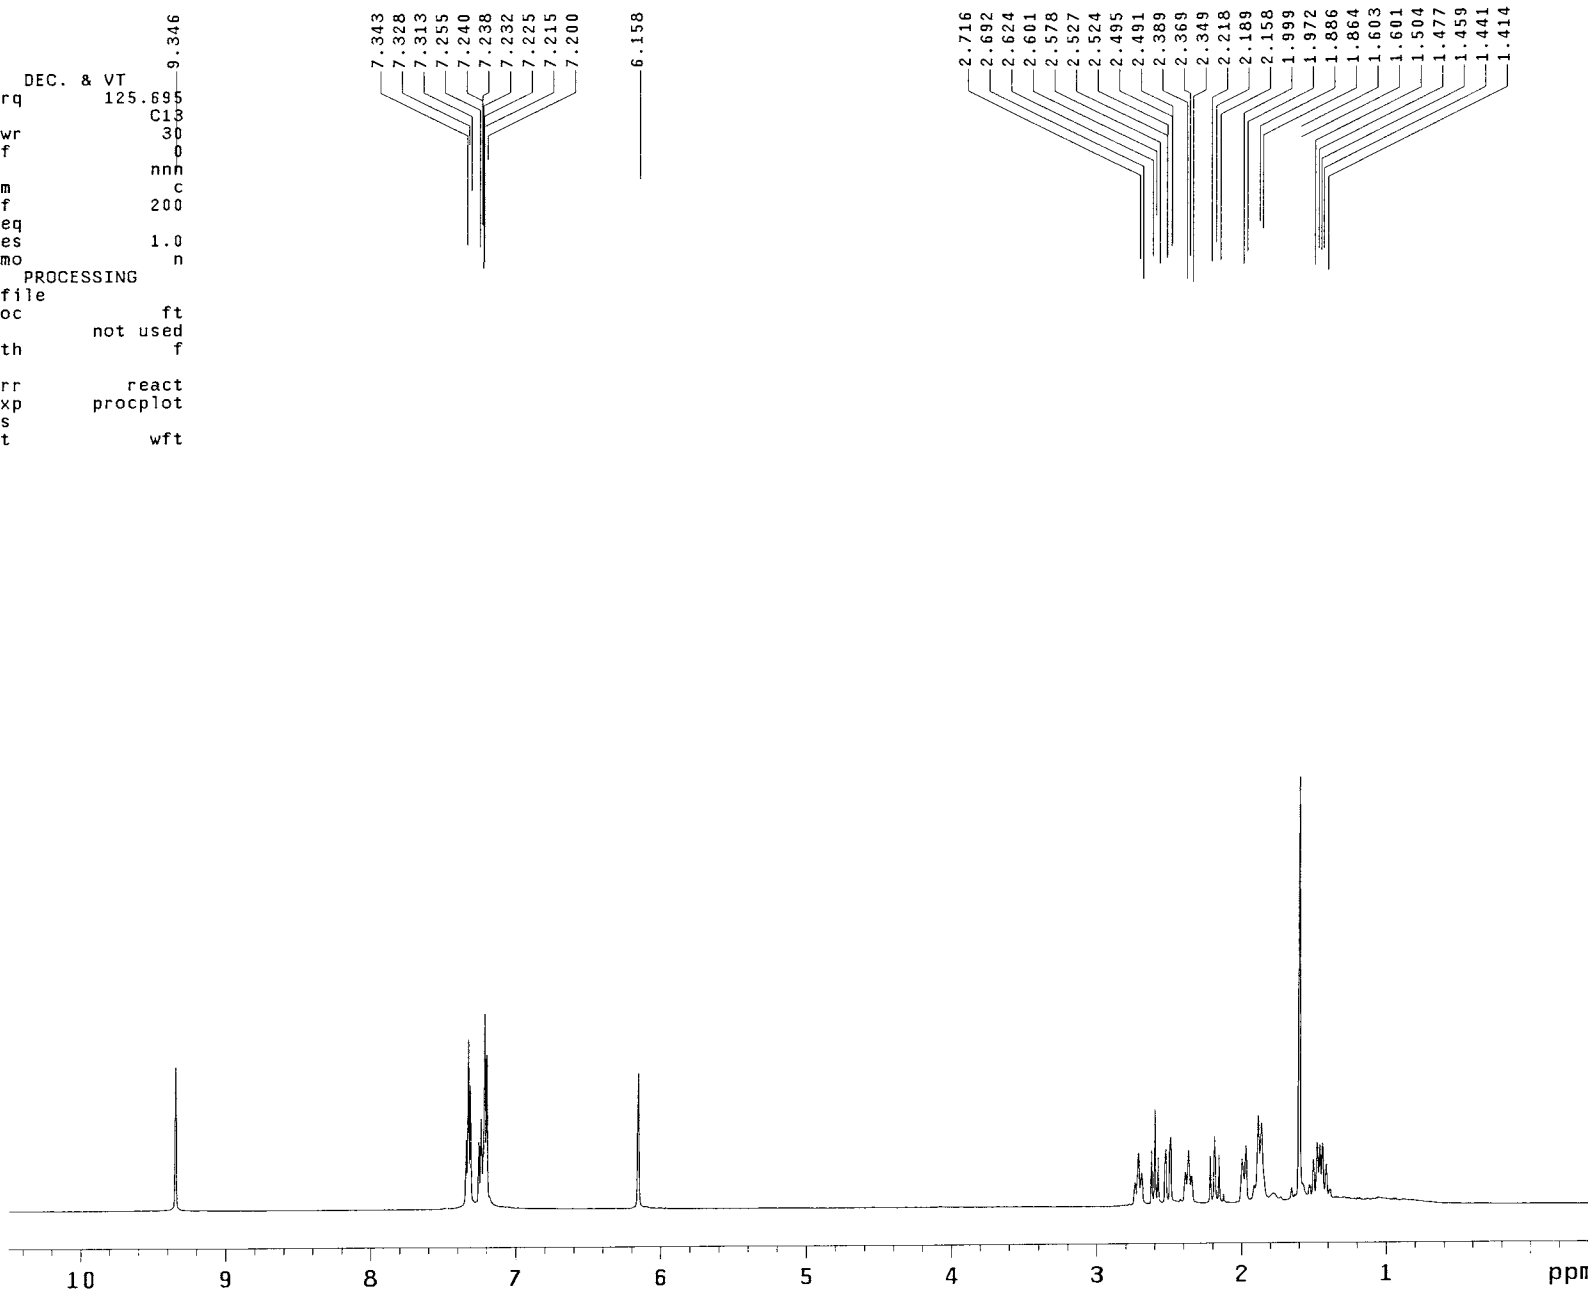

STANDARD CARBON PARAMETERS

exp17 s2pu1

SAMPLE DEC. & VT

date Nov 15 2008 dfrq 499.836  
 solvent cdcl3 dn H1  
 file exp dpwr 39  
 ACQUISITION dof 0  
 sfrq 125.698 dm yyy  
 tn C13 dmm w  
 at 1.000 dmf 11905  
 np 62894 dseq  
 sw 31446.5 dres 1.0  
 fb 17000 homo n  
 bs 16 PROCESSING  
 ss 2 lb 1.00  
 tpwr 54 wtfile  
 pw 4.0 proc ft  
 d1 1.000 fn not used  
 tof 2512.2 math f  
 nt 5000  
 ct 5000 werr react  
 alock y wexp procplot  
 gain not used wbs testsn  
 wnt

FLAGS

il n  
 in n  
 dp y  
 hs nn

DISPLAY

sp -1256.9  
 wp 27650.1  
 vs 53  
 sc 0  
 wc 210  
 hzmm 131.67  
 is 500.00  
 rfl 10987.3  
 rfp 9677.6  
 th 8  
 ins 100.000  
 nm ph

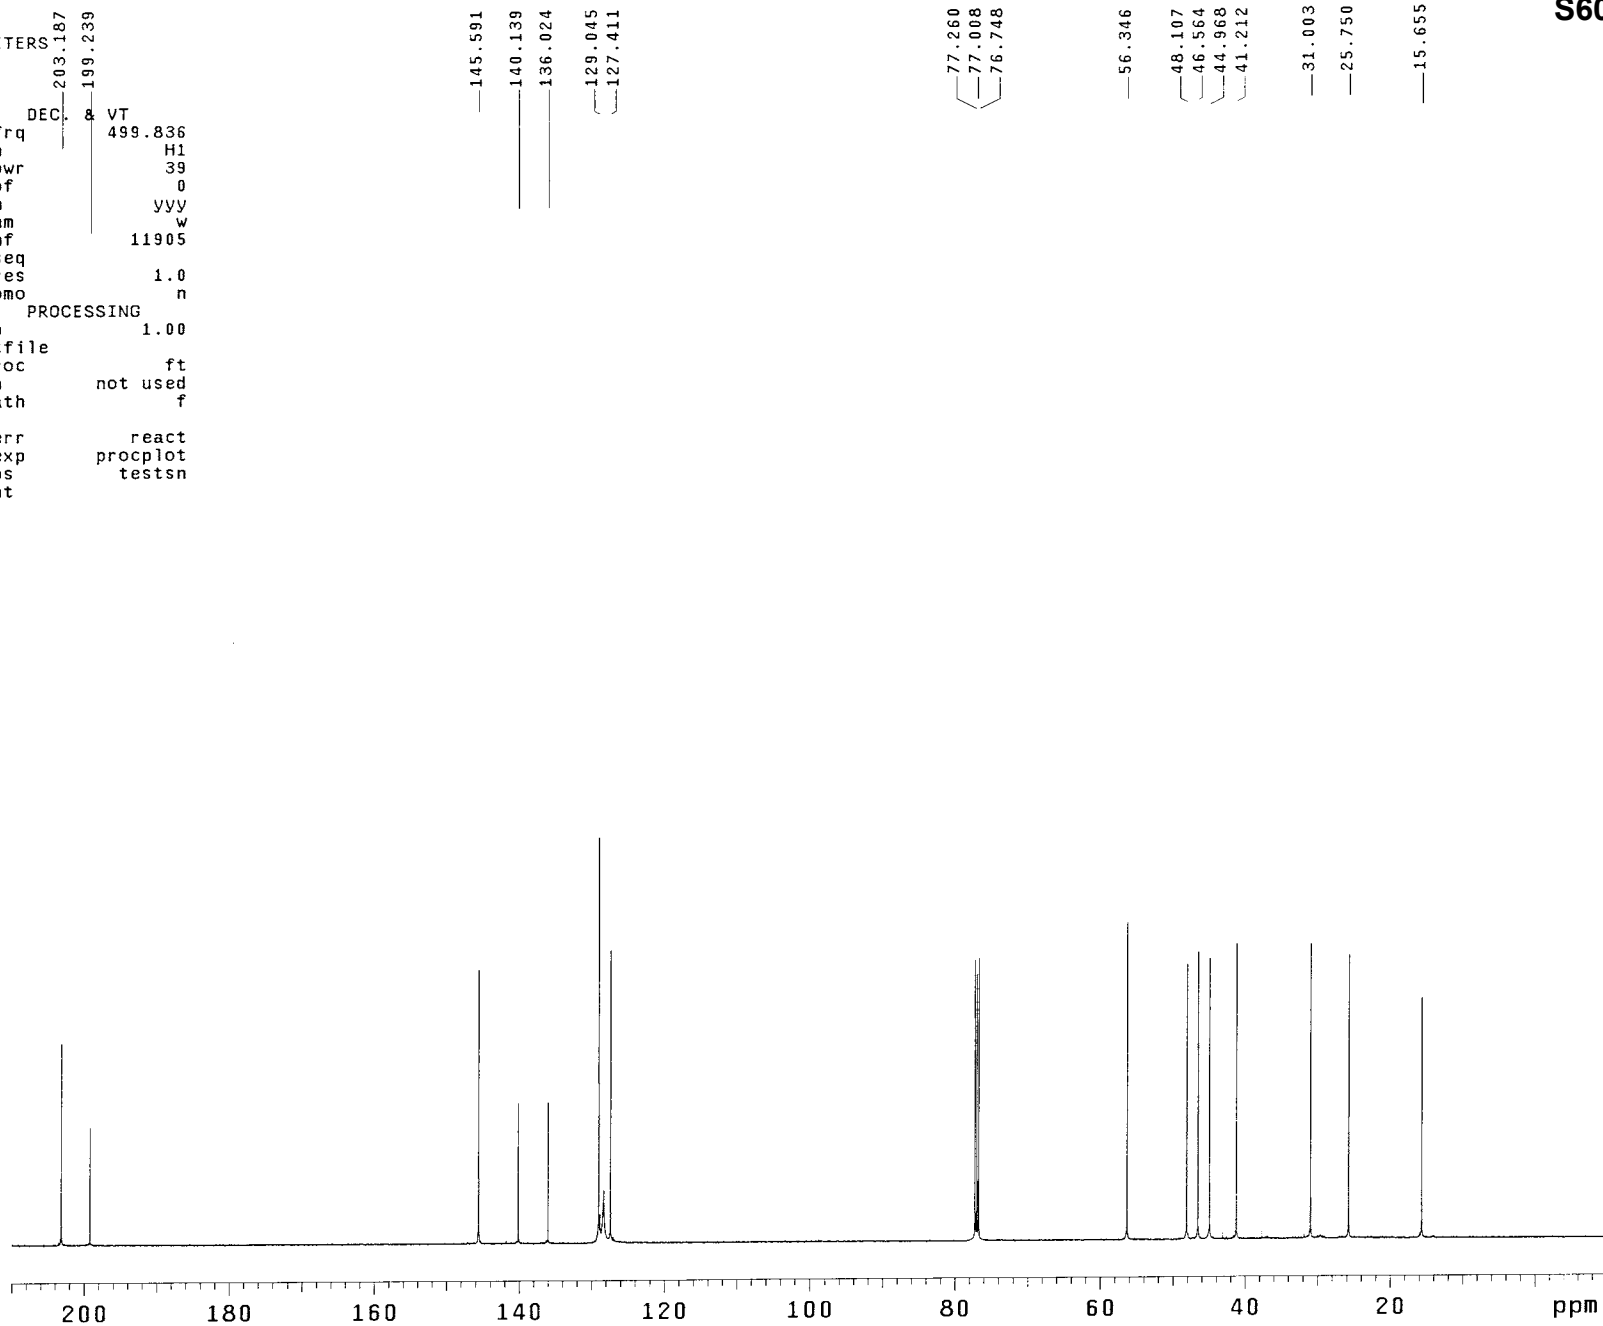Fig S60. <sup>13</sup>C NMR of 5h (125 MHz, CDCl<sub>3</sub>).

Fig S61. DEPT of 5h (CDCl3).

RYN-2-140

exp13 DEPT

| SAMPLE      |             | DEPT          | ACQUISITION ARRAYS |      |
|-------------|-------------|---------------|--------------------|------|
| date        | Nov 15 2008 | j1xh 140.0    | array              | mult |
| solvent     | cdc13       | mult          | arrayed            | 3    |
| sample      | undefined   | SPECIAL       |                    |      |
| ACQUISITION |             | temp not used | i                  | mult |
| sw          | 31446.5     | gain 22       | 1                  | 0.5  |
| at          | 1.000       | spin 0        | 2                  | 1    |
| np          | 62894       | PROCESSING    | 3                  | 1.5  |
| bs          | 16          | lb 1.00       |                    |      |
| ss          | -4          | fn not used   |                    |      |
| d1          | 1.000       | SPECTRUM      |                    |      |
| nt          | 600         | wp 27650.1    |                    |      |
| ct          | 600         | sp -1257.2    |                    |      |
| TRANSMITTER |             | rp 16.2       |                    |      |
| tn          | C13         | lp 67.9       |                    |      |
| tof         | 2512.2      | ai cdc ph     |                    |      |
| tpwr        | 54          | REFERENCE     |                    |      |
| pw          | 9.400       | rf1 1269.7    |                    |      |
| DECOUPLER   |             | rfp 0         |                    |      |
| dn          | H1          | PLOT          |                    |      |
| dof         | 0           | wc 210        |                    |      |
| dpwr        | 39          | sc 0          |                    |      |
| dm          | nny         | vs 8703       |                    |      |
| dmm         | ccw         | hzmm 131.67   |                    |      |
| dmf         | 11905       | th 68         |                    |      |
| pp1v1       | 49          |               |                    |      |
| pp          | 29.400      |               |                    |      |

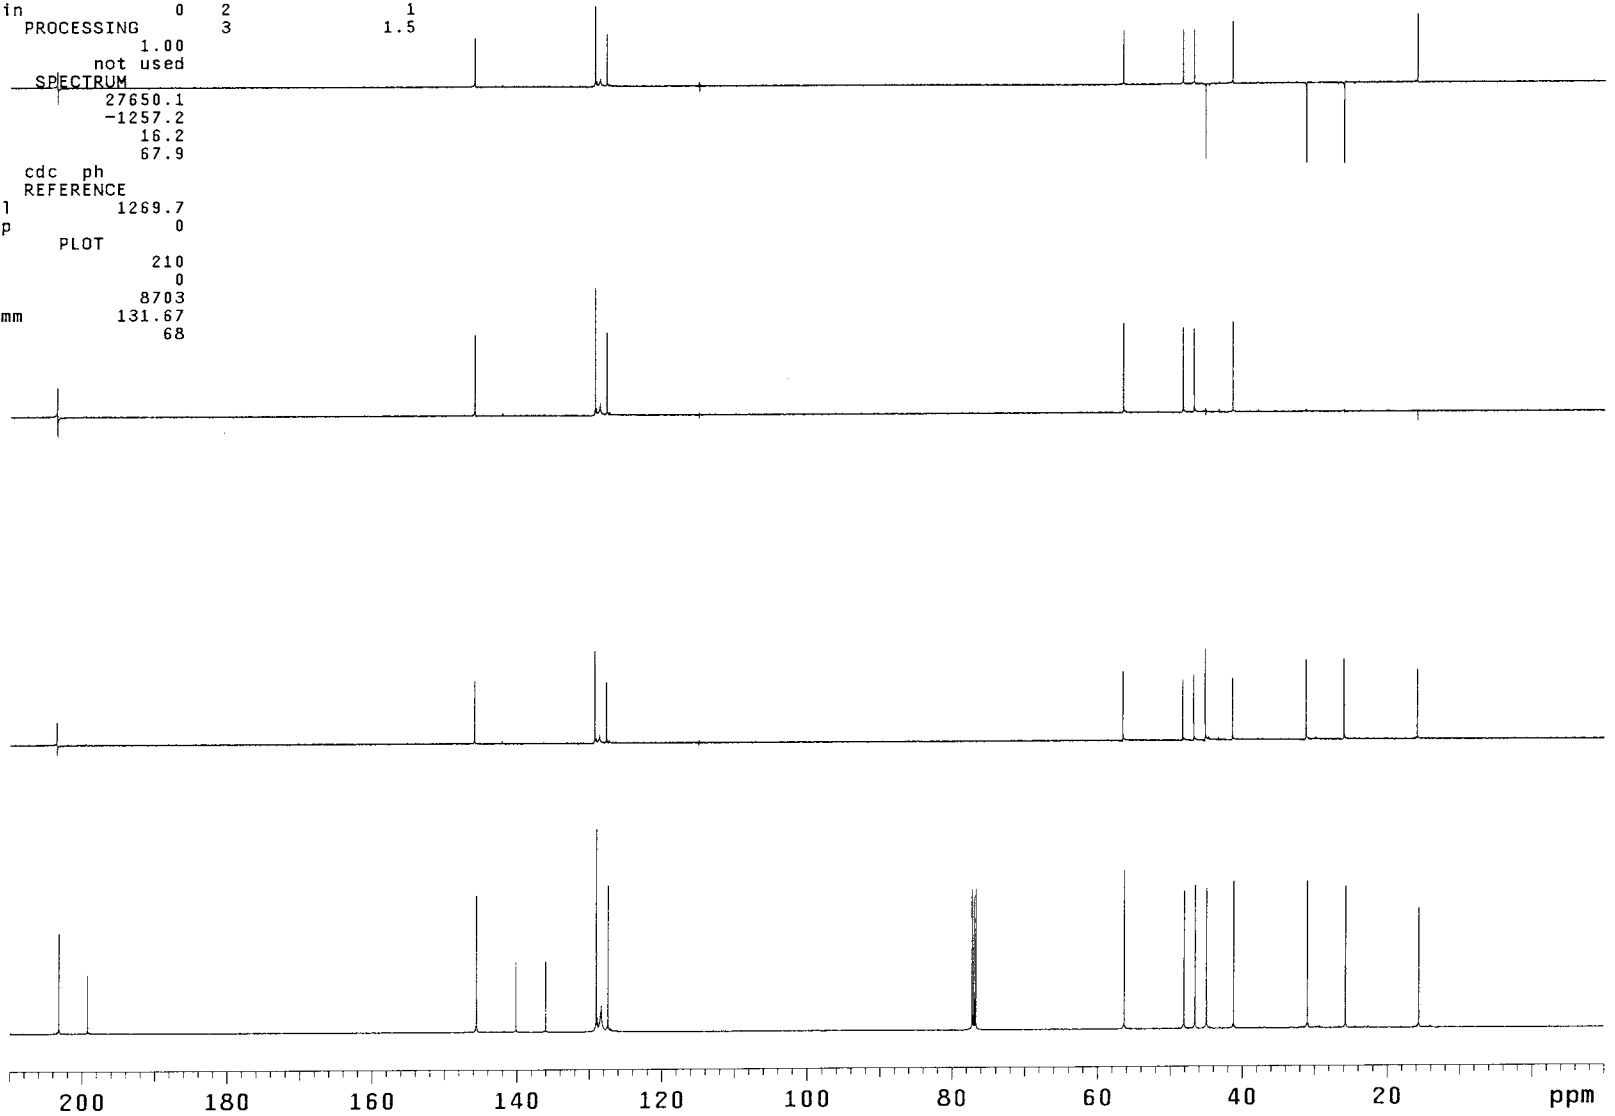

Fig S62. COSY of 5h (CDCl3).

RYN-2-140

exp14 gCOSY

|                |             |               |          |
|----------------|-------------|---------------|----------|
| date           | Nov 15 2008 | hs            | nn       |
| solvent        | cdcl3       | sspul         | n        |
| sample         | undefined   | hsglv1        | 1026     |
| ACQUISITION    |             | SPECIAL       |          |
| sw             | 4498.4      | temp          | not used |
| at             | 0.228       | gain          | 22       |
| np             | 2048        | spin          | 0        |
| fb             | 3000        | F2 PROCESSING |          |
| ss             | 16          | sb            | -0.114   |
| d1             | 1.000       | sbs           | not used |
| nt             | 16          | fn            | 2048     |
| 2D ACQUISITION |             | F1 PROCESSING |          |
| sw1            | 4498.4      | sb1           | -0.028   |
| ni             | 128         | sbs1          | not used |
| TRANSMITTER    |             | procl         | lp       |
| tn             | H1          | fn1           | 2048     |
| sfrq           | 499.836     | DISPLAY       |          |
| tof            | 249.8       | sp            | 482.8    |
| tpwr           | 57          | wp            | 4494.0   |
| pw             | 13.000      | sp1           | 485.3    |
| GRADIENTS      |             | wp1           | 4494.0   |
| gzlv11         | 1026        | rfl           | 2595.6   |
| gt1            | 0.001000    | rfp           | 3074.0   |
| gstab          | 0.000500    | rfl1          | 2593.1   |
| DECOUPLER      |             | rfp1          | 3074.0   |
| dn             | C13         | PLOT          |          |
| dm             | nnn         | wc            | 155.0    |
|                |             | sc            | 10.0     |
|                |             | wc2           | 155.0    |
|                |             | sc2           | 0        |
|                |             | vs            | 113      |
|                |             | th            | 4        |
|                |             | ai            | cdc av   |

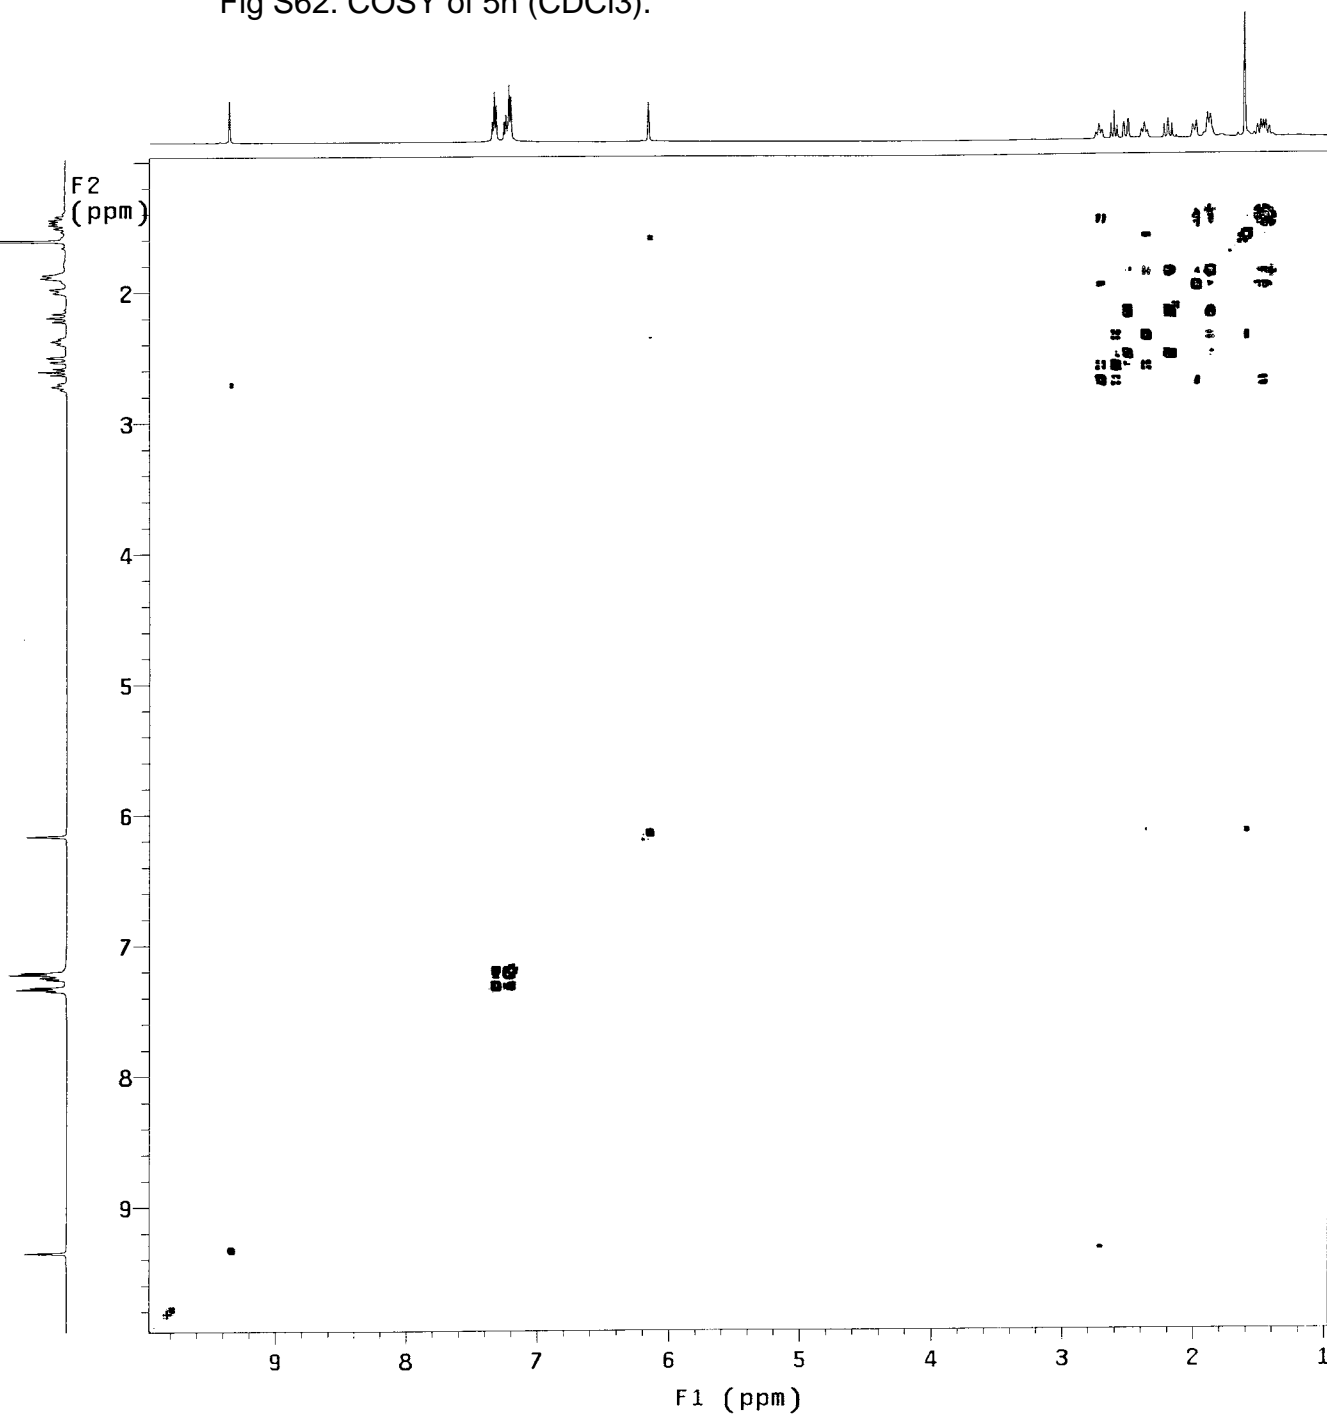

RYN-2-140

exp15 gHMQC

Fig S63. HMQC of 5h (CDCl3).

| SAMPLE         |             | FLAGS         |          | ACQUISITION ARRAYS |       |
|----------------|-------------|---------------|----------|--------------------|-------|
| date           | Nov 15 2008 | hs            | n        | array              | phase |
| solvent        | cdcl3       | sspul         | y        | arraydim           | 256   |
| sample         | undefined   | PFGflg        | y        |                    |       |
| ACQUISITION    |             | hsglv1        | 1026     | i                  | phase |
| sw             | 4498.4      | SPECIAL       |          | 1                  | 1     |
| at             | 0.228       | temp          | not used | 2                  | 2     |
| np             | 2048        | gain          | 22       |                    |       |
| fb             | 3000        | spin          | 0        |                    |       |
| ss             | 32          | GRADIENTS     |          |                    |       |
| d1             | 1.000       | gzlv11        | 1026     |                    |       |
| nt             | 16          | gt1           | 0.001000 |                    |       |
| 2D ACQUISITION |             | gzlv13        | 516      |                    |       |
| sw1            | 21367.5     | gt3           | 0.001000 |                    |       |
| n1             | 128         | gstab         | 0.000500 |                    |       |
| phase          | arrayed     | F2 PROCESSING |          |                    |       |
| TRANSMITTER    |             | gf            | 0.105    |                    |       |
| tn             | H1          | gfs           | not used |                    |       |
| sfrq           | 499.836     | fn            | 2048     |                    |       |
| tof            | 249.8       | F1 PROCESSING |          |                    |       |
| tpwr           | 57          | gf1           | 0.006    |                    |       |
| pw             | 13.000      | gfs1          | not used |                    |       |
| DECOUPLER      |             | procl         | lp       |                    |       |
| dn             | C13         | fn1           | 2048     |                    |       |
| dof            | -2515.1     | DISPLAY       |          |                    |       |
| dm             | nny         | sp            | 504.1    |                    |       |
| dmm            | ccp         | wp            | 3483.6   |                    |       |
| dmf            | 32258       | sp1           | 1282.1   |                    |       |
| dpwr           | 35          | wp1           | 17861.9  |                    |       |
| pwxlvl         | 51          | rfl           | 2596.2   |                    |       |
| pwxc           | 14.700      | rfl           | 3074.0   |                    |       |
| HMQC           |             | rfl1          | 19603.8  |                    |       |
| j1xh           | 140.0       | rfl1          | 18298.3  |                    |       |
| nullflg        | y           | PLOT          |          |                    |       |
|                |             | wc            | 150.0    |                    |       |
|                |             | sc            | 6.2      |                    |       |
|                |             | wc2           | 116.2    |                    |       |
|                |             | sc2           | 0        |                    |       |
|                |             | vs            | 1814     |                    |       |
|                |             | th            | 3        |                    |       |
|                |             | ai            | cdc      |                    |       |
|                |             |               | ph       |                    |       |

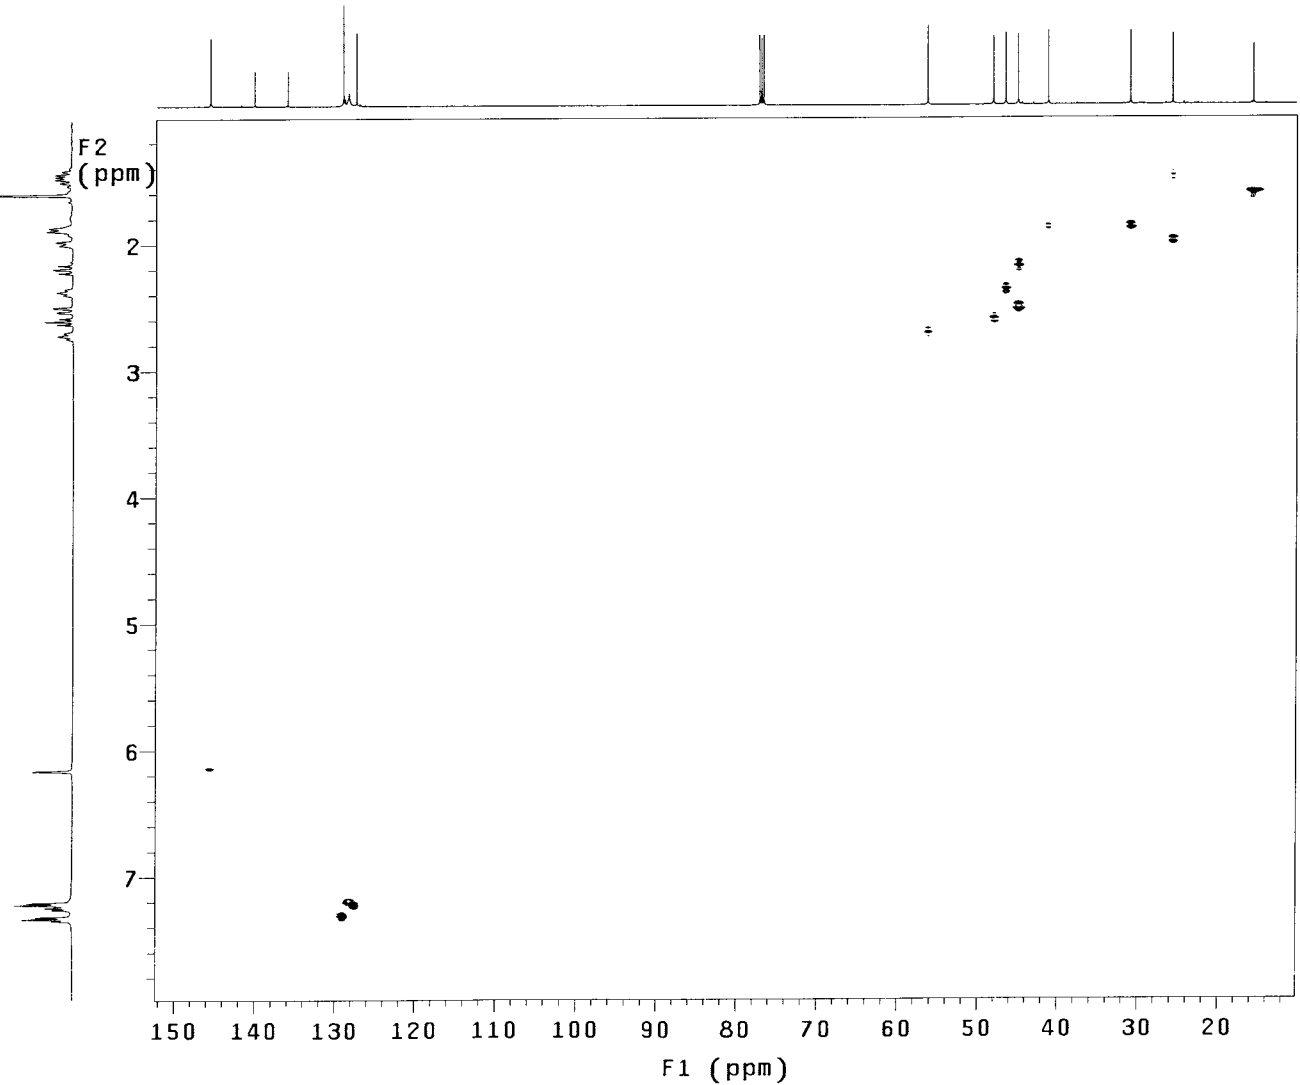

Fig S64. NOESY of 5h (CDCl3).

RYN-2-140

exp16 NOESY

|                |             |               |          |
|----------------|-------------|---------------|----------|
| date           | Nov 15 2008 | hs            | n        |
| solvent        | cdcl3       | sspul         | y        |
| sample         | undefined   | PFGflg        | y        |
| ACQUISITION    |             | hsglvt        | 1026     |
| sw             | 4498.4      | SPECIAL       |          |
| at             | 0.228       | temp          | not used |
| np             | 2048        | gain          | 20       |
| fb             | 3000        | spin          | 0        |
| ss             | 32          | F2 PROCESSING |          |
| d1             | 1.000       | gf            | 0.105    |
| nt             | 8           | gfs           | not used |
| 2D ACQUISITION |             | fn            | 2048     |
| sw1            | 4498.4      | F1 PROCESSING |          |
| ni             | 200         | gf1           | 0.041    |
| TRANSMITTER    |             | gfs1          | not used |
| tn             | H1          | procl         | lp       |
| sfrq           | 499.836     | fn1           | 2048     |
| tof            | 249.8       | DISPLAY       |          |
| tpwr           | 57          | sp            | 480.2    |
| pw             | 13.000      | wp            | 4494.0   |
| NOESY          |             | sp1           | 485.2    |
| mix            | 0.200       | wp1           | 4494.0   |
| PRESATURATION  |             | rfl           | 2598.1   |
| satmode        | nnnn        | rfp           | 3074.0   |
| satpwr         | 0           | rfl1          | 2593.1   |
| satdly         | 0           | rfp1          | 3074.0   |
| satfrq         | 0           | PLOT          |          |
| DECOUPLER      |             | wc            | 155.0    |
| dn             | C13         | sc            | 10.0     |
| dm             | nnn         | wc2           | 155.0    |
|                |             | sc2           | 0        |
|                |             | vs            | 1814     |
|                |             | th            | 1        |
|                |             | ai            | ph       |

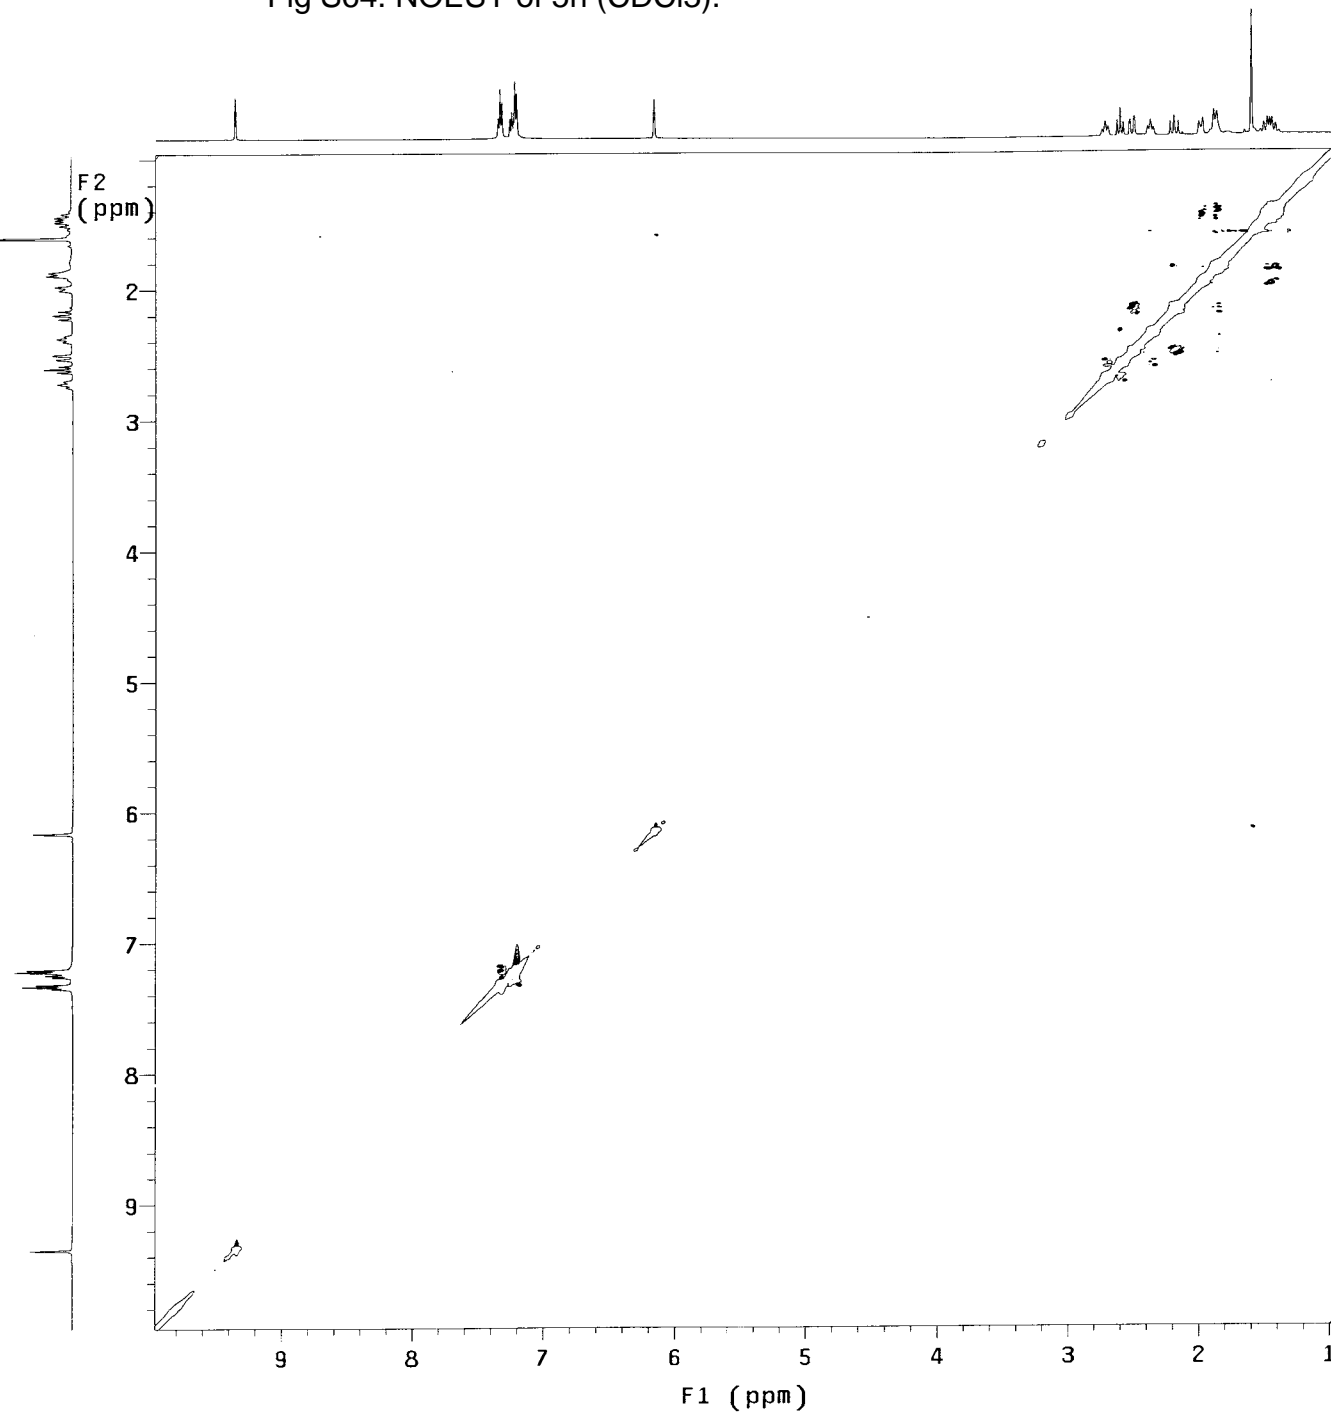



Fig S65. 1H NMR of 5i (500 MHz, CDCl3).

RYN-2-141

exp11 s2pu1

|             |             |            |          |
|-------------|-------------|------------|----------|
| date        | Nov 17 2008 | dfrq       | 125.695  |
| solvent     | cdcl3       | dn         | C13      |
| file        | exp         | dpwr       | 30       |
| ACQUISITION |             |            |          |
| sfrq        | 499.836     | dm         | nn       |
| tn          | H1          | dmm        | c        |
| at          | 3.000       | dmf        | 240      |
| np          | 48000       | dseq       |          |
| sw          | 8000.0      | dres       | 1.0      |
| fb          | 4000        | homo       | n        |
| bs          | 4           | PROCESSING |          |
| tpwr        | 57          | wfile      |          |
| pw          | 4.8         | proc       | ft       |
| d1          | 1.000       | fn         | not used |
| tof         | 499.7       | math       | f        |
| nt          | 4           |            |          |
| ct          | 4           | werr       | react    |
| alock       | not used    | wexp       | procplot |
| gain        | not used    | wbs        |          |
| FLAGS       |             |            |          |
| il          | n           | wnt        | wft      |
| in          | n           |            |          |
| dp          | y           |            |          |
| hs          | nn          |            |          |
| DISPLAY     |             |            |          |
| sp          | -250.1      |            |          |
| wp          | 5498.0      |            |          |
| vs          | 44          |            |          |
| sc          | 0           |            |          |
| wc          | 210         |            |          |
| hzmm        | 26.18       |            |          |
| is          | 192.00      |            |          |
| rfl         | 4636.2      |            |          |
| rfp         | 3618.8      |            |          |
| th          | 5           |            |          |
| ins         | 100.000     |            |          |
| nm          | ph          |            |          |

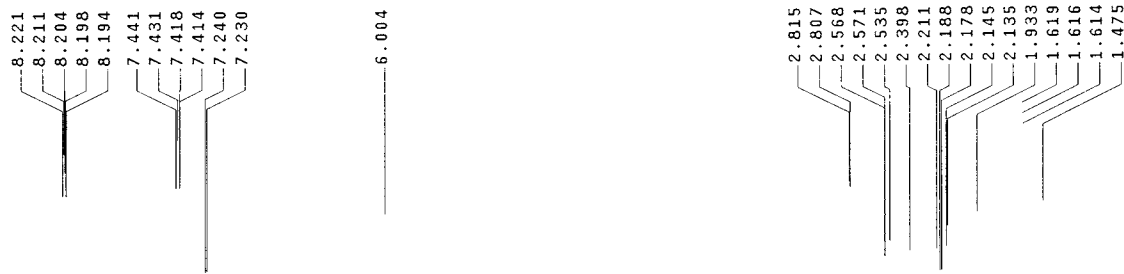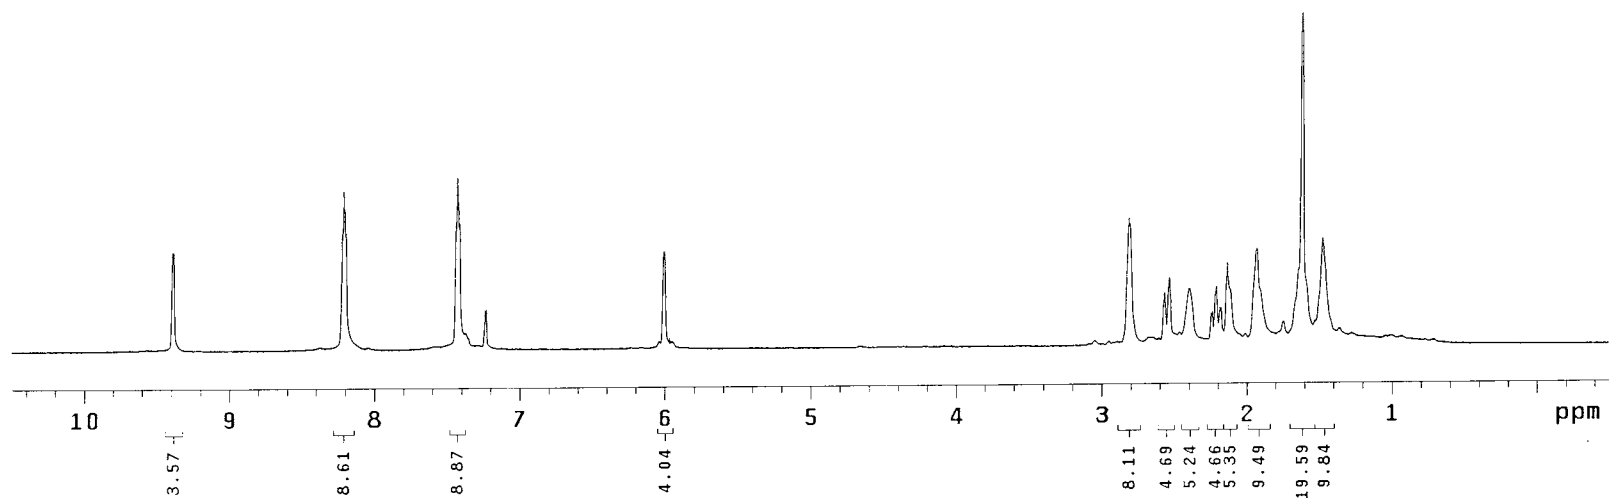

RYN-2-141

exp12 s2pul

```

SAMPLE
date Nov 17 2008 dfrq 499.836
solvent cdc13 dn H1
file exp dpwr 39
ACQUISITION
sfrq 125.698 dm yyy
tn C13 dmm w
at 1.000 dmf 11905
np 62894 dseq
sw 31446.5 dres 1.0
fb 17000 homo n
bs 16
ss 2 lb 1.00
tpwr 54 wtfile
pw 4.0 proc ft
dl 1.000 fn not used
tof 2512.2 math f
nt 20000
ct 17408 werr react
alock y wexp procplot
gain not used wbs testsn
FLAGS wnt

DISPLAY
sp -1256.9
wp 27650.1
vs 119
sc 0
wc 210
hzmm 131.67
is 500.00
rfl 10981.5
rfp 9677.6
th 5
ins 100.000
nm ph

```

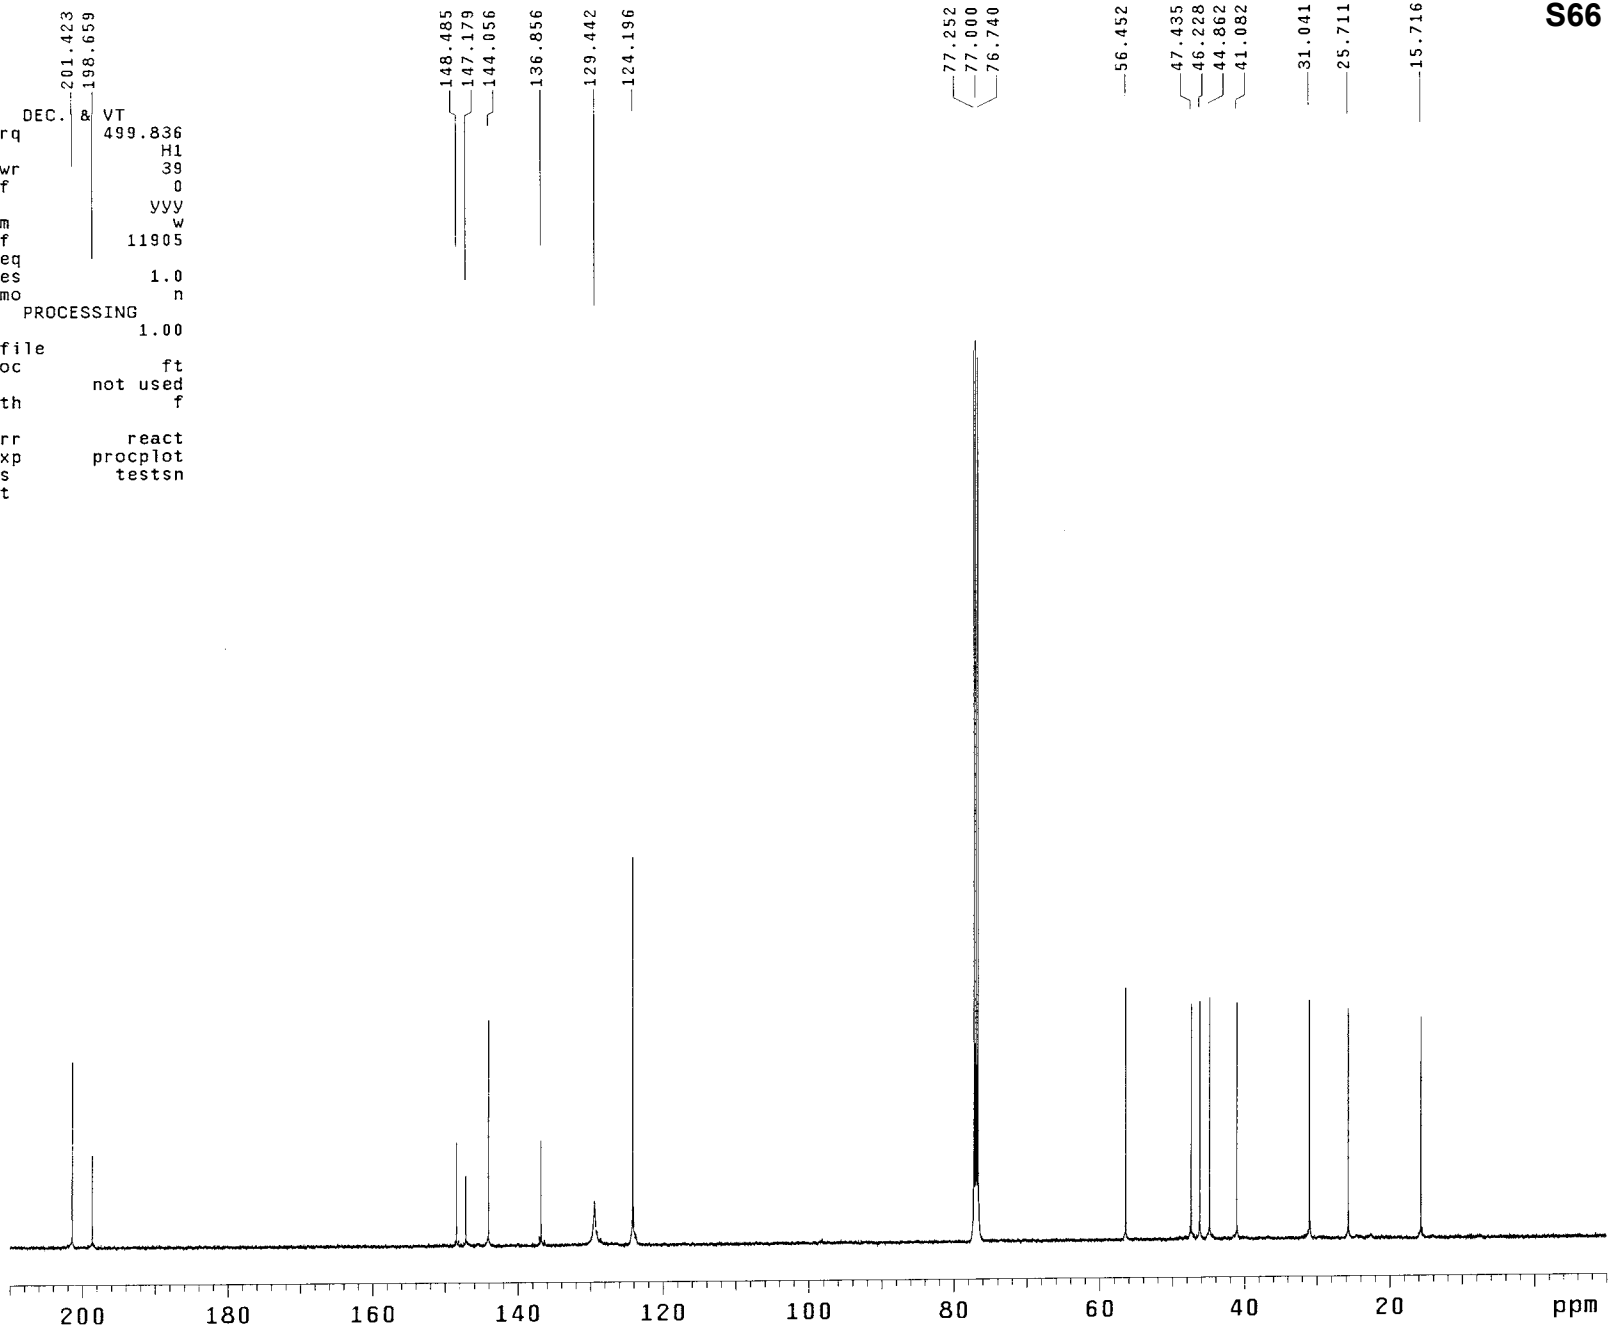Fig S66.  $^{13}\text{C}$  NMR of 5i (125 MHz,  $\text{CDCl}_3$ ).

RYN-2-141

Fig S67. DEPT of 5i (CDCl<sub>3</sub>).

exp13 DEPT

|         |             |            |           |             |        |
|---------|-------------|------------|-----------|-------------|--------|
| date    | Nov 17 2008 | j1xh       | 140.0     | ACQUISITION | ARRAYS |
| solvent | cdcl3       | mult       | arrayed   | array       | mult   |
| sample  | undefined   |            |           | arraydim    | 3      |
|         |             |            |           |             |        |
|         |             |            |           |             |        |
| sw      | 31446.5     | temp       | not used  | i           | mult   |
| at      | 1.000       | gain       | 20        | 1           | 0.5    |
| np      | 62894       | spin       | 0         | 2           | 1      |
| bs      | 16          | PROCESSING |           | 3           | 1.5    |
| ss      | -4          | lb         | 1.00      |             |        |
| d1      | 1.000       | fn         | not used  |             |        |
| nt      | 2000        |            |           |             |        |
| ct      | 2000        | SPECTRUM   |           |             |        |
|         |             |            |           |             |        |
| tn      | C13         | wp         | 27650.1   |             |        |
| tof     | 2512.2      | sp         | -1257.2   |             |        |
| tpwr    | 54          | rp         | 11.5      |             |        |
| pw      | 9.400       | lp         | 102.9     |             |        |
|         |             | ai         | cdc ph    |             |        |
|         |             |            | REFERENCE |             |        |
|         |             | rfl        | 1269.7    |             |        |
|         |             | rfp        | 0         |             |        |
|         |             |            |           |             |        |
| dn      | H1          | PLOT       |           |             |        |
| dof     | 0           | wc         | 210       |             |        |
| dpwr    | 39          | sc         | 0         |             |        |
| dm      | nny         | vs         | 419       |             |        |
| dmm     | ccw         | hzmm       | 131.67    |             |        |
| dmf     | 11905       | th         | 68        |             |        |
| pp1v1   | 49          |            |           |             |        |
| pp      | 29.400      |            |           |             |        |

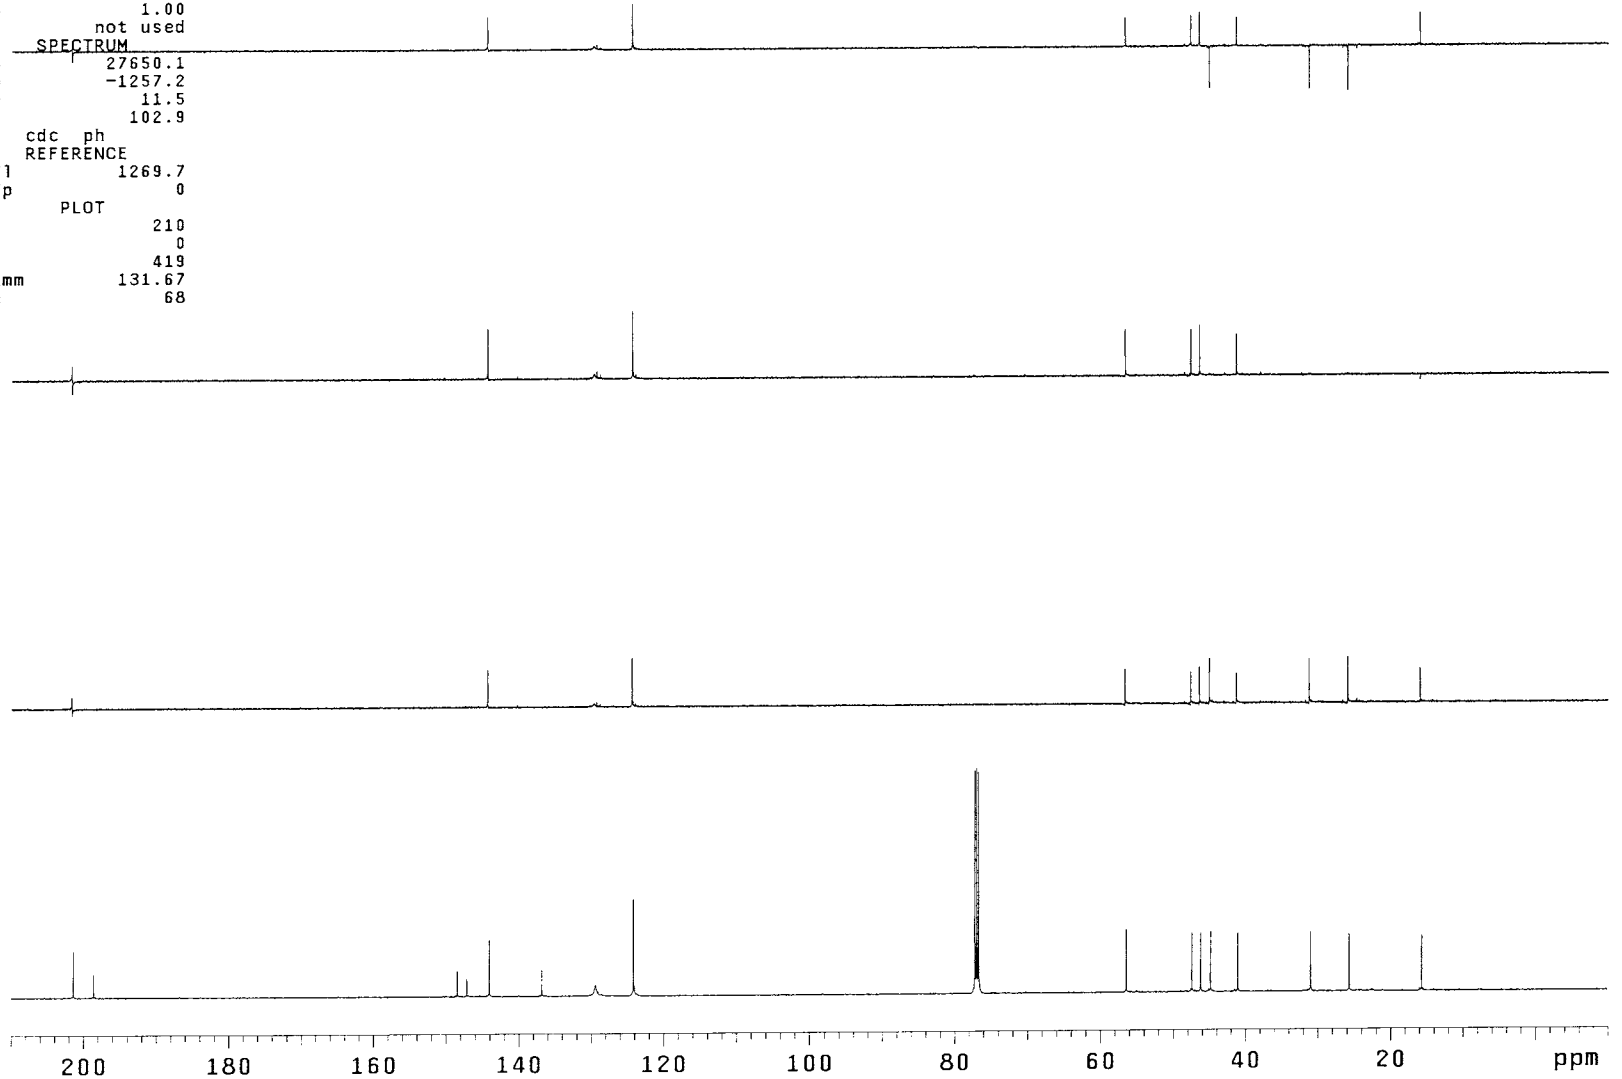

Fig S68. COSY of 5i (CDCl<sub>3</sub>).

RYN-2-141

exp14 gCOSY

|                |             |               |          |
|----------------|-------------|---------------|----------|
| date           | Nov 17 2008 | hs            | nn       |
| solvent        | cdcl3       | sspul         | n        |
| sample         | undefined   | hsglv1        | 1026     |
| ACQUISITION    |             | SPECIAL       |          |
| sw             | 4998.4      | temp          | not used |
| at             | 0.205       | gain          | 30       |
| np             | 2048        | spin          | 0        |
| fb             | 3000        | F2 PROCESSING |          |
| ss             | 16          | sb            | -0.102   |
| d1             | 1.000       | sbs           | not used |
| nt             | 16          | fn            | 2048     |
| 2D ACQUISITION |             | F1 PROCESSING |          |
| sw1            | 4998.4      | sb1           | -0.026   |
| ni             | 128         | sbs1          | not used |
| TRANSMITTER    |             | proc1         | lp       |
| tn             | H1          | fn1           | 2048     |
| sfrq           | 499.836     | DISPLAY       |          |
| tof            | -0.1        | sp            | 4.8      |
| tpwr           | 57          | wp            | 4993.6   |
| pw             | 13.000      | sp1           | 4.8      |
| GRADIENTS      |             | wp1           | 4993.6   |
| gzlv11         | 1026        | rfl           | 0.1      |
| gt1            | 0.001000    | rfp           | 0        |
| gstab          | 0.000500    | rfl1          | 0.1      |
| DECOUPLER      |             | rfp1          | 0        |
| dn             | C13         | PLOT          |          |
| dm             | nnn         | wc            | 155.0    |
|                |             | sc            | 10.0     |
|                |             | wc2           | 155.0    |
|                |             | sc2           | 0        |
|                |             | vs            | 1814     |
|                |             | th            | 7        |
|                |             | ai            | cdc av   |

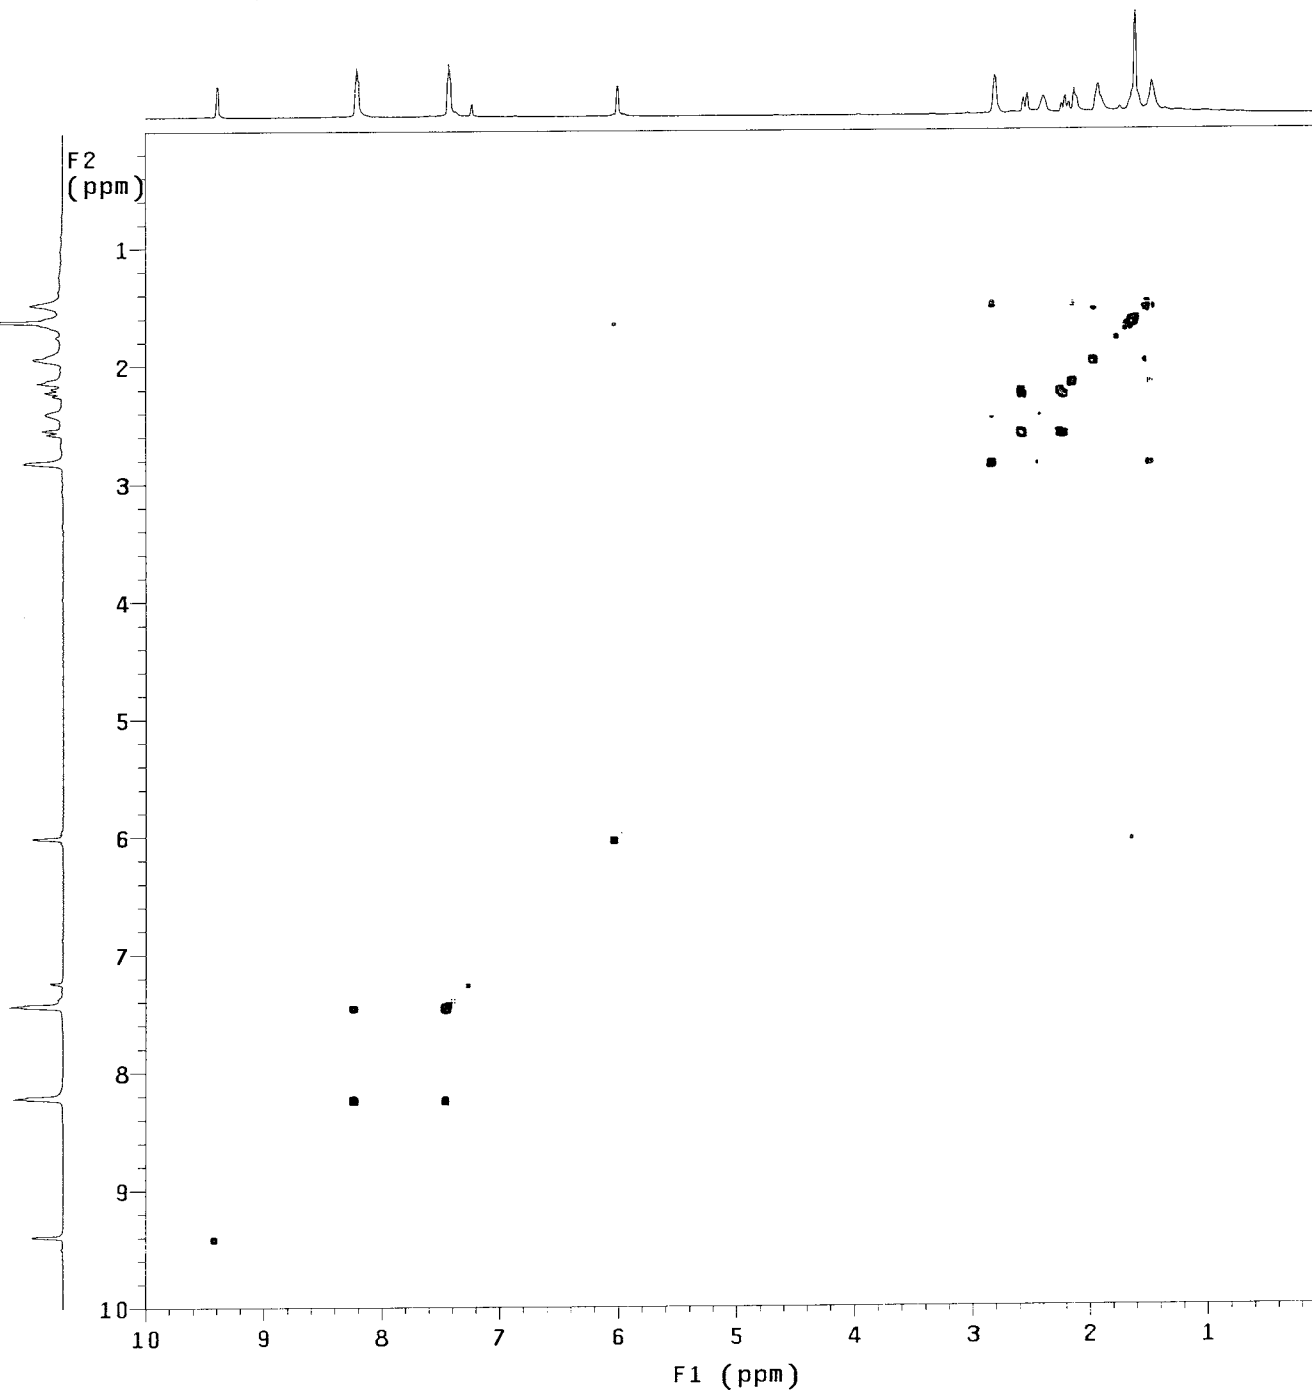

RYN-2-141

Fig S69. HMQC of 5i (CDCl3).

exp15 gHMQC

| SAMPLE           | FLAGS         | ACQUISITION | ARRAYS |
|------------------|---------------|-------------|--------|
| date Nov 17 2008 | hs            | n           | phase  |
| solvent cdcl3    | sspul         | y           | 256    |
| sample undefined | PFGflg        | y           |        |
| ACQUISITION      | hsglv1        | 1026        | i      |
| sw 4998.4        | SPECIAL       | 1           | phase  |
| at 0.205         | temp          | not used    | 1      |
| np 2048          | gain          | 30          | 2      |
| fb 3000          | spin          | 0           |        |
| ss 32            | GRADIENTS     |             |        |
| d1 1.000         | gzlv11        | 1026        |        |
| nt 16            | gt1           | 0.001000    |        |
| 2D ACQUISITION   | gzlv13        | 516         |        |
| sw1 21367.5      | gt3           | 0.001000    |        |
| ni 128           | gstab         | 0.000500    |        |
| phase arrayed    | F2 PROCESSING |             |        |
| TRANSMITTER      | gf            | 0.095       |        |
| tn H1            | gfs           | not used    |        |
| sfrq 499.836     | fn            | 2048        |        |
| tof -0.1         | F1 PROCESSING |             |        |
| tpwr 57          | gf1           | 0.006       |        |
| pw 13.000        | gfs1          | not used    |        |
| DECOUPLER        | proc1         | 1p          |        |
| dn C13           | fn1           | 2048        |        |
| dof -2515.1      | DISPLAY       |             |        |
| dm nny           | sp            | 420.4       |        |
| dmm ccp          | wp            | 4090.5      |        |
| dmf 32258        | sp1           | 1465.6      |        |
| dpwr 35          | wpl           | 17215.0     |        |
| pwxlvl 51        | rfl           | 3019.9      |        |
| pwxc 14.700      | rfp           | 3001.0      |        |
| HMQC             | rfl1          | 19373.3     |        |
| j1xh 140.0       | rfp1          | 18105.4     |        |
| nullflg y        | PLOT          |             |        |
|                  | wc            | 150.0       |        |
|                  | sc            | 6.2         |        |
|                  | wc2           | 116.2       |        |
|                  | sc2           | 0           |        |
|                  | vs            | 1814        |        |
|                  | th            | 6           |        |
|                  | ai cdc ph     |             |        |

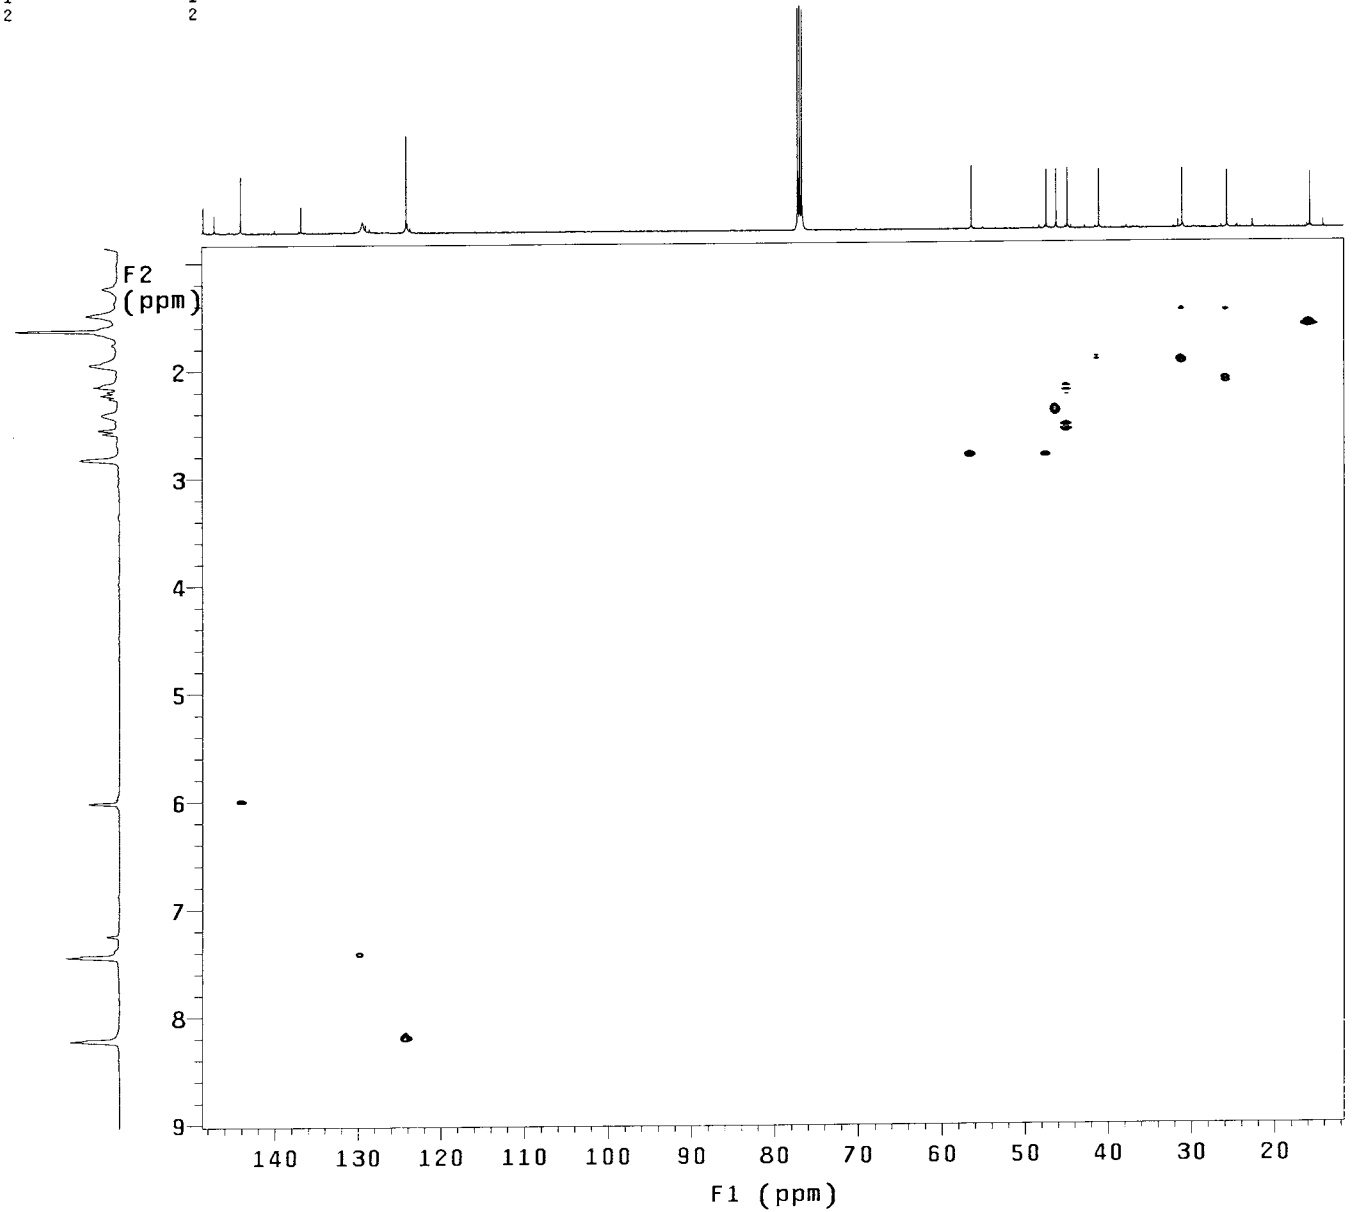

Fig S70. NOESY of 5i (CDCl3).

RYN-2-141

exp16 NOESY

|                |             |               |          |   |
|----------------|-------------|---------------|----------|---|
| date           | Nov 17 2008 | hs            |          | n |
| solvent        | cdcl3       | sspul         |          | y |
| sample         | undefined   | PFGflg        |          | y |
| ACQUISITION    |             | hsglvt        | 1026     |   |
| sw             | 4998.4      | SPECIAL       |          |   |
| at             | 0.205       | temp          | not used |   |
| np             | 2048        | gain          | 50       |   |
| fb             | 3000        | spin          | 0        |   |
| ss             | 32          | F2 PROCESSING |          |   |
| d1             | 1.000       | gf            | 0.095    |   |
| nt             | 8           | gfs           | not used |   |
| 2D ACQUISITION |             | fn            | 2048     |   |
| sw1            | 4998.4      | F1 PROCESSING |          |   |
| ni             | 200         | gf1           | 0.037    |   |
| TRANSMITTER    |             | gfs1          | not used |   |
| tn             | H1          | procl         | lp       |   |
| sfrq           | 499.836     | fn1           | 2048     |   |
| tof            | -0.1        | DISPLAY       |          |   |
| tpwr           | 57          | sp            | -18.6    |   |
| pw             | 13.000      | wp            | 4993.6   |   |
| NOESY          |             | sp1           | -11.9    |   |
| mix            | 0.200       | wp1           | 4993.6   |   |
| PRESATURATION  |             | rfl           | 3024.5   |   |
| satmode        | nnnn        | rfp           | 3001.0   |   |
| satpwr         | 0           | rfl1          | 3017.7   |   |
| satdly         | 0           | rfp1          | 3001.0   |   |
| satfrq         | 0           | PLOT          |          |   |
| DECOUPLER      |             | wc            | 155.0    |   |
| dn             | C13         | sc            | 10.0     |   |
| dm             | nnn         | wc2           | 155.0    |   |
|                |             | sc2           | 0        |   |
|                |             | vs            | 1814     |   |
|                |             | th            | 1        |   |
|                |             | ai            | ph       |   |

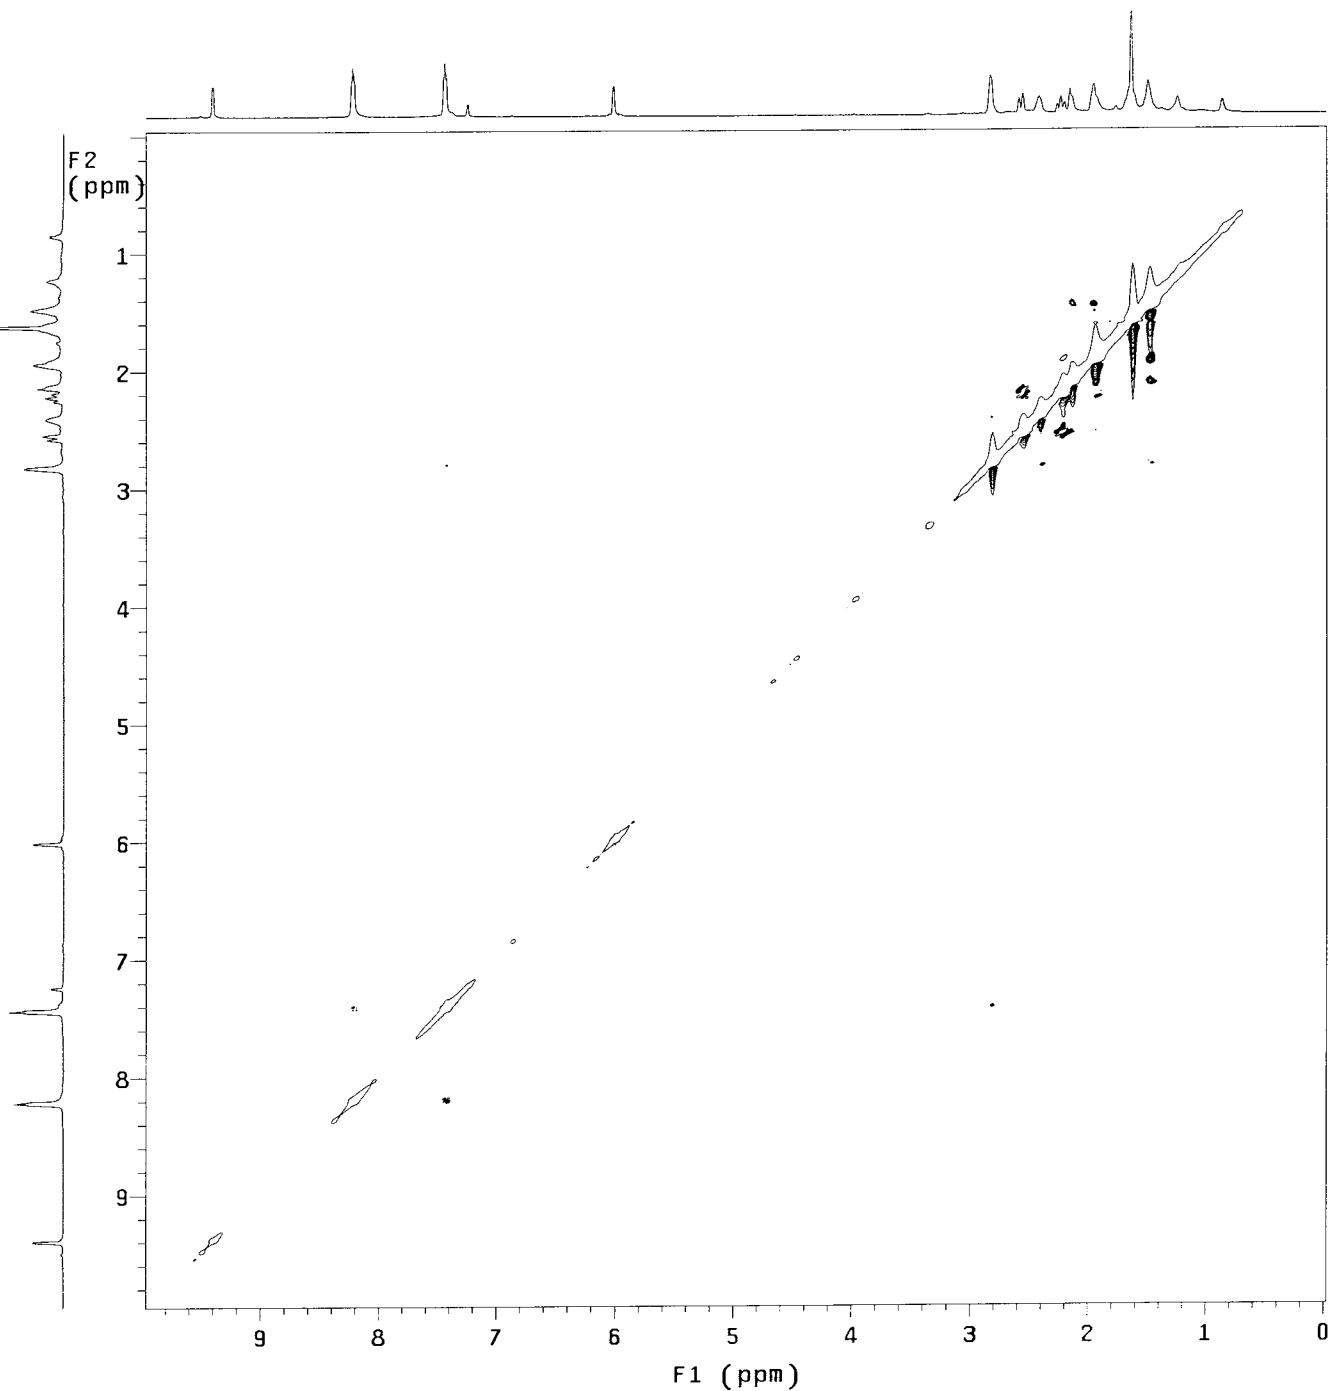

Fig S71. <sup>1</sup>H NMR of 5j (500 MHz, CDCl<sub>3</sub>).

S71

RYN-2-145

exp21 s2pul

|             |             |            |          |
|-------------|-------------|------------|----------|
| date        | Nov 28 2008 | dfrq       | 125.699  |
| solvent     | cdcl3       | dn         | C13      |
| file        | exp         | dpwr       | 30       |
| ACQUISITION |             |            |          |
| sfrq        | 499.836     | dm         | nnh      |
| tn          | H1          | dmm        | c        |
| at          | 3.000       | dmf        | 200      |
| np          | 48000       | dseq       |          |
| sw          | 8000.0      | dres       | 1.0      |
| fb          | 4000        | homo       | n        |
| bs          | 4           | PROCESSING |          |
| tpwr        | 57          | wtfile     |          |
| pw          | 4.8         | proc       | ft       |
| d1          | 1.000       | fn         | not used |
| tof         | 499.7       | math       | f        |
| nt          | 4           |            |          |
| ct          | 4           | werr       | react    |
| alock       | y           | wexp       | procplot |
| gain        | not used    | wbs        |          |
| FLAGS       |             |            |          |
| il          | n           | wnt        | wft      |
| in          | n           |            |          |
| dp          | y           |            |          |
| hs          | nn          |            |          |
| DISPLAY     |             |            |          |
| sp          | -250.1      |            |          |
| wp          | 5498.0      |            |          |
| vs          | 77          |            |          |
| sc          | 0           |            |          |
| wc          | 210         |            |          |
| hzmm        | 26.18       |            |          |
| is          | 131.36      |            |          |
| rfl         | 4626.2      |            |          |
| rpf         | 3618.8      |            |          |
| th          | 7           |            |          |
| ins         | 100.000     |            |          |
| nm          | ph          |            |          |

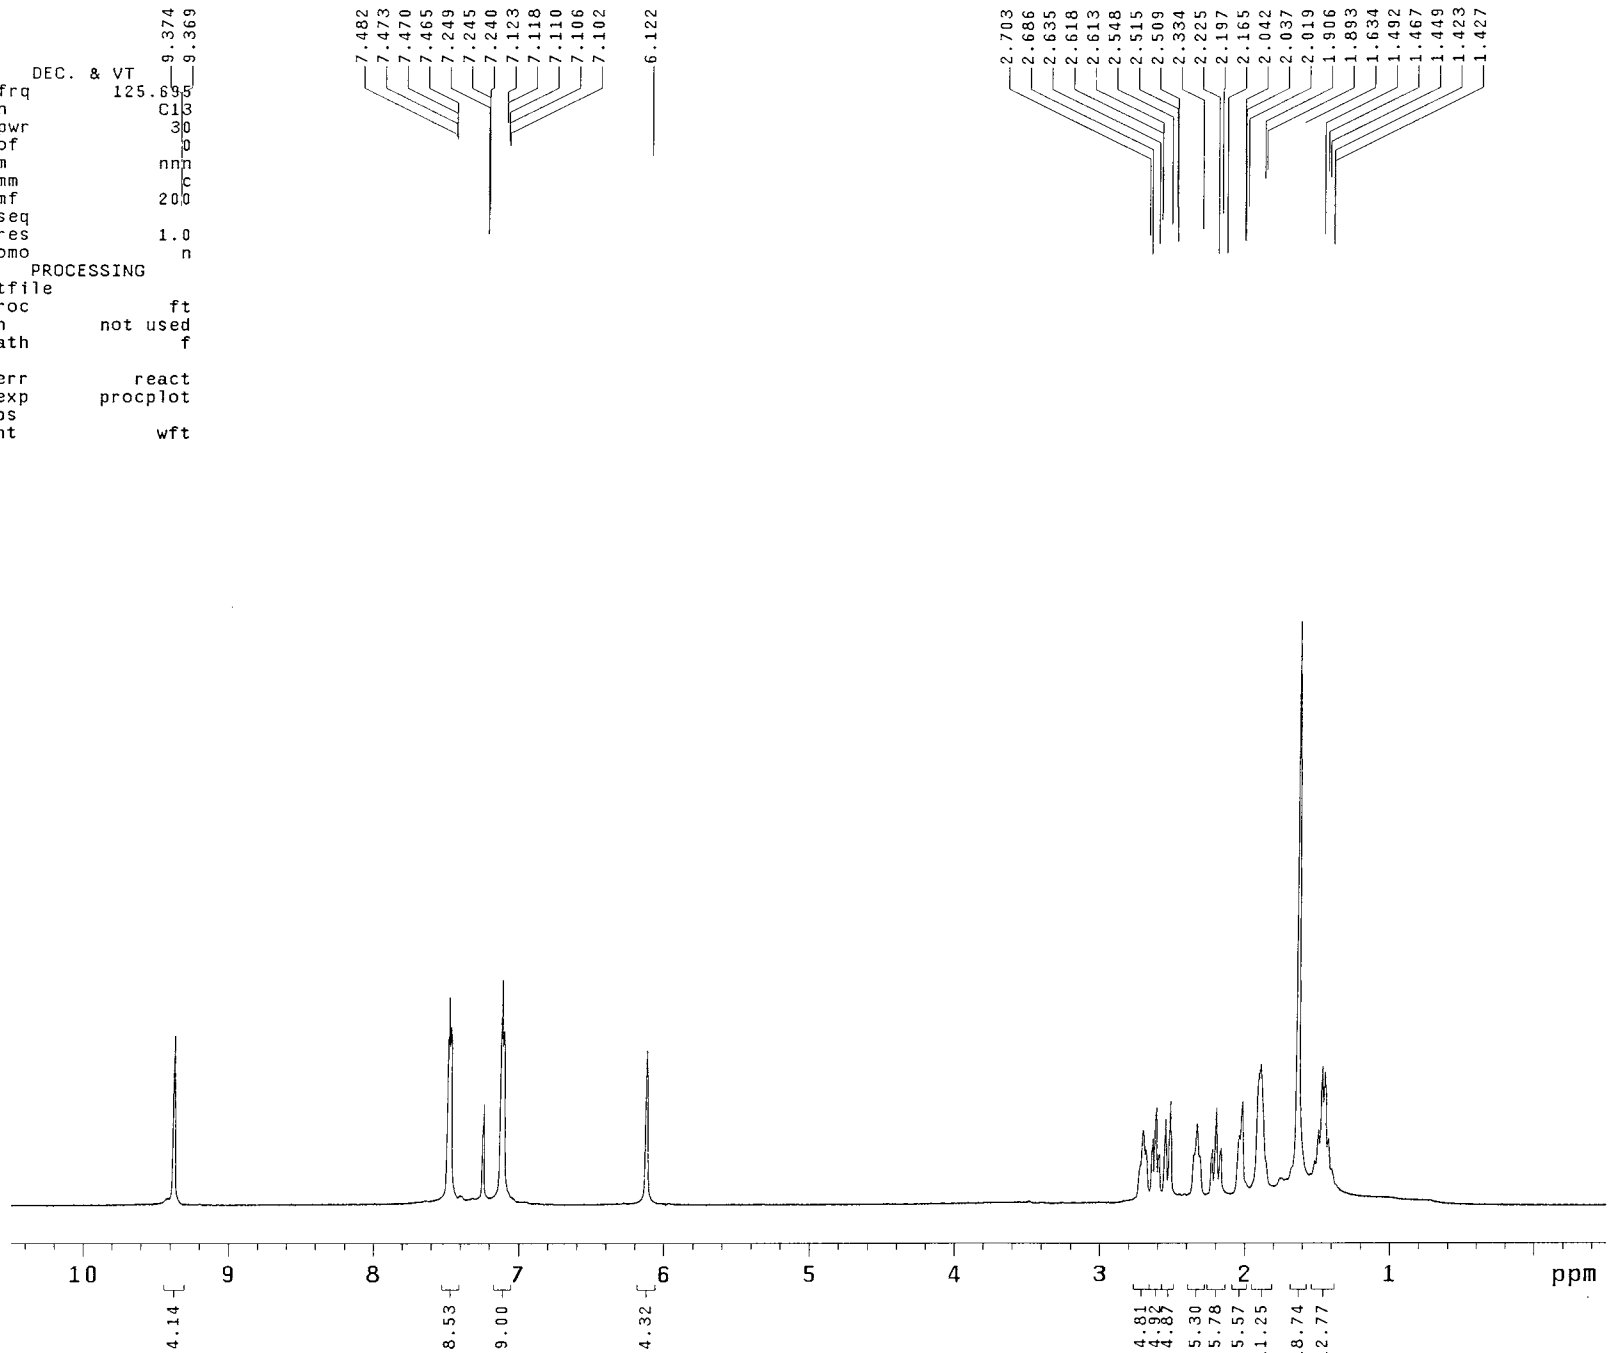

RYN-2-145  
 exp23 s2pu1

SAMPLE  
 date Nov 28 2008 dfrq 499.836  
 solvent cdc13 dn H1  
 file exp dpwr 39  
 ACQUISITION dof 0  
 sfrq 125.698 dm yyy  
 tn C13 dmm w  
 at 1.000 dmf 11905  
 np 62894 dseq  
 sw 31446.5 dres 1.0  
 fb 17000 homo n

PROCESSING  
 bs 16 lb 1.00  
 ss 2  
 tpwr 54 wfile  
 pw 4.0 proc ft  
 d1 1.000 fn not used  
 tof 2512.2 math f  
 nt 10000  
 ct 10000 werr react  
 alock y wexp procplot  
 gain not used wbs testsn  
 wnt

FLAGS  
 il n  
 in n  
 dp y  
 hs nn

DISPLAY  
 sp -1256.9  
 wp 27650.1  
 vs 94  
 sc 0  
 wc 210  
 hzmm 131.67  
 is 500.00  
 rfl 10979.6  
 rfp 9677.6  
 th 4  
 ins 100.000  
 nm ph

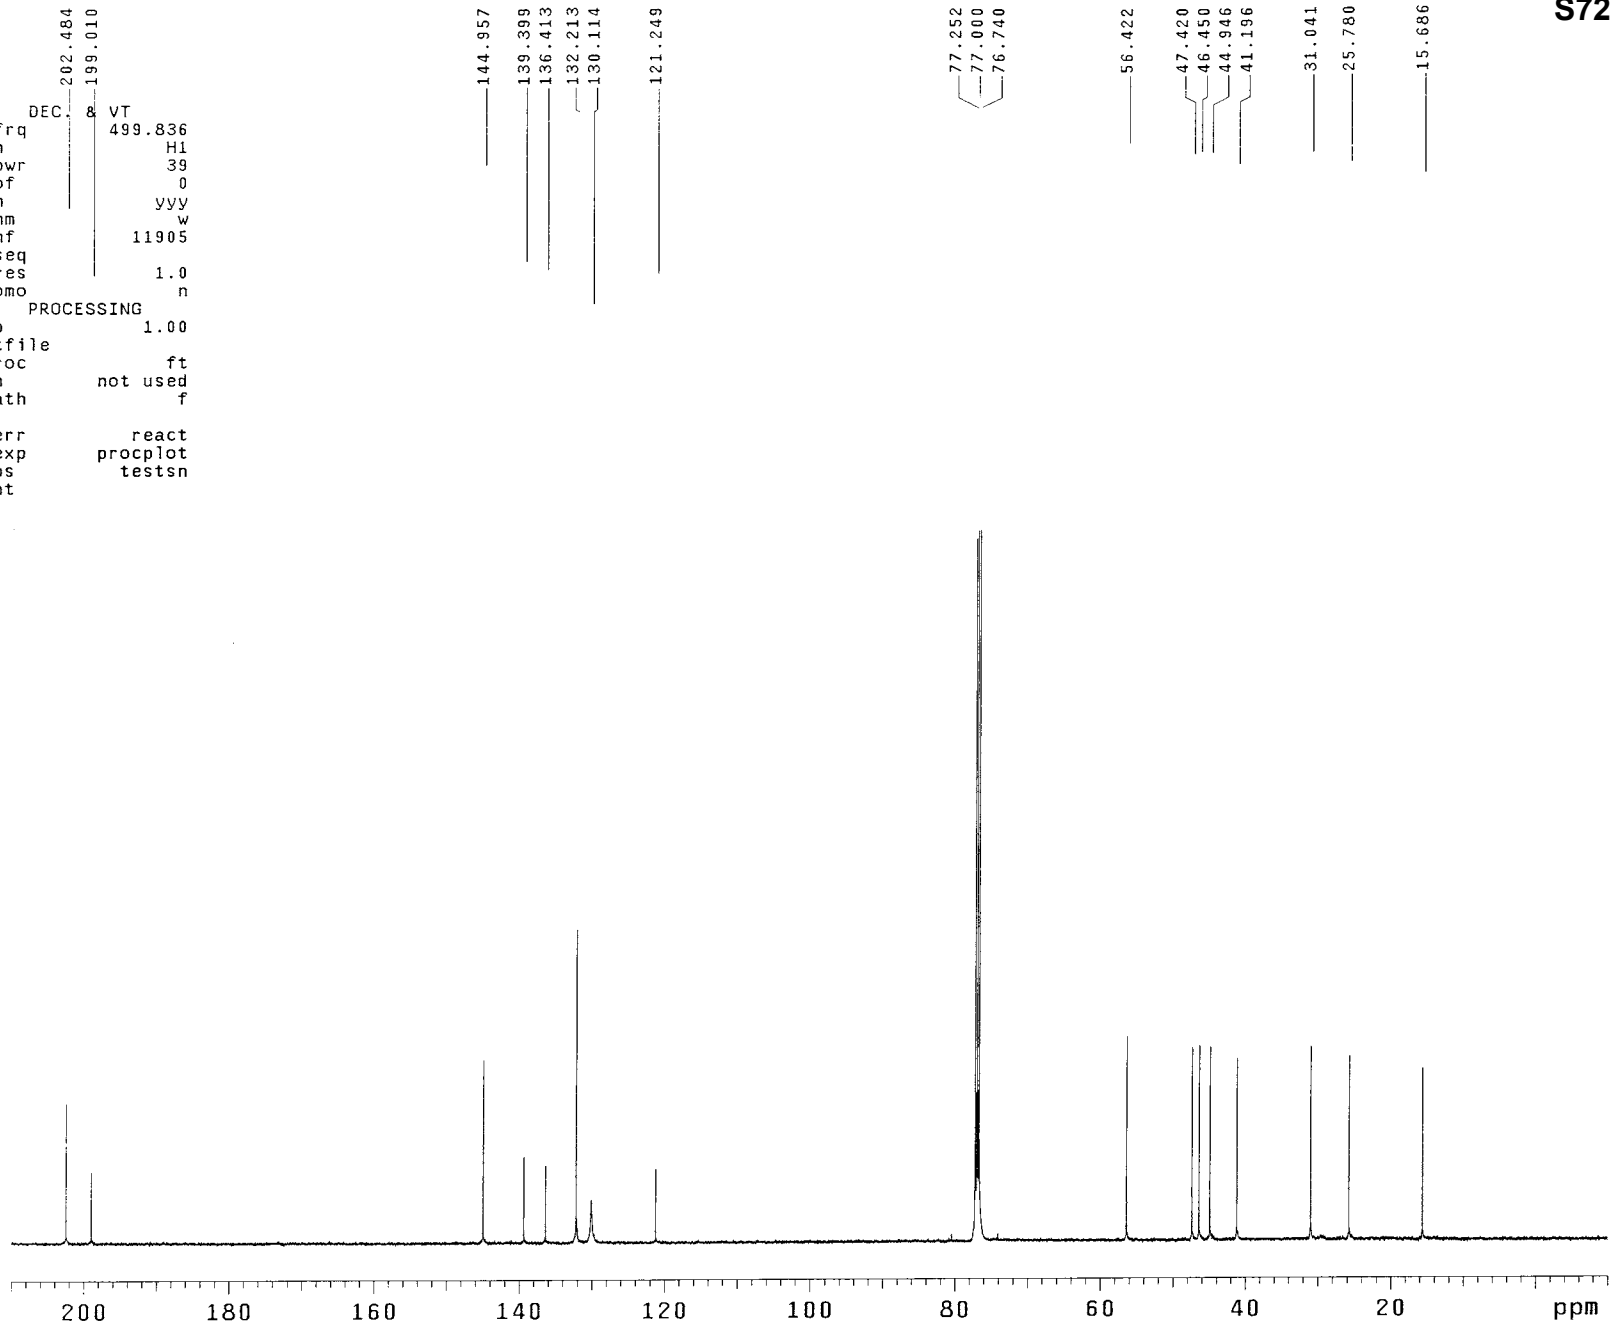Fig S72. <sup>13</sup>C NMR of 5j (125 MHz, CDCl<sub>3</sub>).



Fig S73. DEPT of 5j (CDCl3).

RYN-2-145

exp22 DEPT

| SAMPLE      |             | DEPT          | ACQUISITION ARRAYS |      |
|-------------|-------------|---------------|--------------------|------|
| date        | Nov 28 2008 | j1xh 140.0    | array              | mult |
| solvent     | cdcl3       | mult arrayed  | arraydim           | 3    |
| sample      | undefined   | SPECIAL       |                    |      |
| ACQUISITION |             | temp not used | i                  | mult |
| sw          | 31446.5     | gain 28       | 1                  | 0.5  |
| at          | 1.000       | spin 0        | 2                  | 1    |
| np          | 62894       | PROCESSING    | 3                  | 1.5  |
| bs          | 16          | lb 1.00       |                    |      |
| ss          | -4          | fn not used   |                    |      |
| d1          | 1.000       | SPECTRUM      |                    |      |
| nt          | 1200        | wp 27650.1    |                    |      |
| ct          | 1200        | sp -1257.2    |                    |      |
| TRANSMITTER |             | rp 15.9       |                    |      |
| tn          | C13         | lp 83.1       |                    |      |
| tof         | 2512.2      | ai cdc ph     |                    |      |
| tpwr        | 54          | REFERENCE     |                    |      |
| pw          | 9.400       | rfl 1269.7    |                    |      |
| DECOUPLER   |             | rfl           |                    |      |
| dn          | H1          | rfl           |                    |      |
| dof         | 0           | PLOT          |                    |      |
| dpwr        | 39          | wc 210        |                    |      |
| dm          | nny         | sc 0          |                    |      |
| dmm         | ccw         | vs 21817      |                    |      |
| dmf         | 11905       | hzmm 131.67   |                    |      |
| pp1v1       | 49          | th 68         |                    |      |
| pp          | 29.400      |               |                    |      |

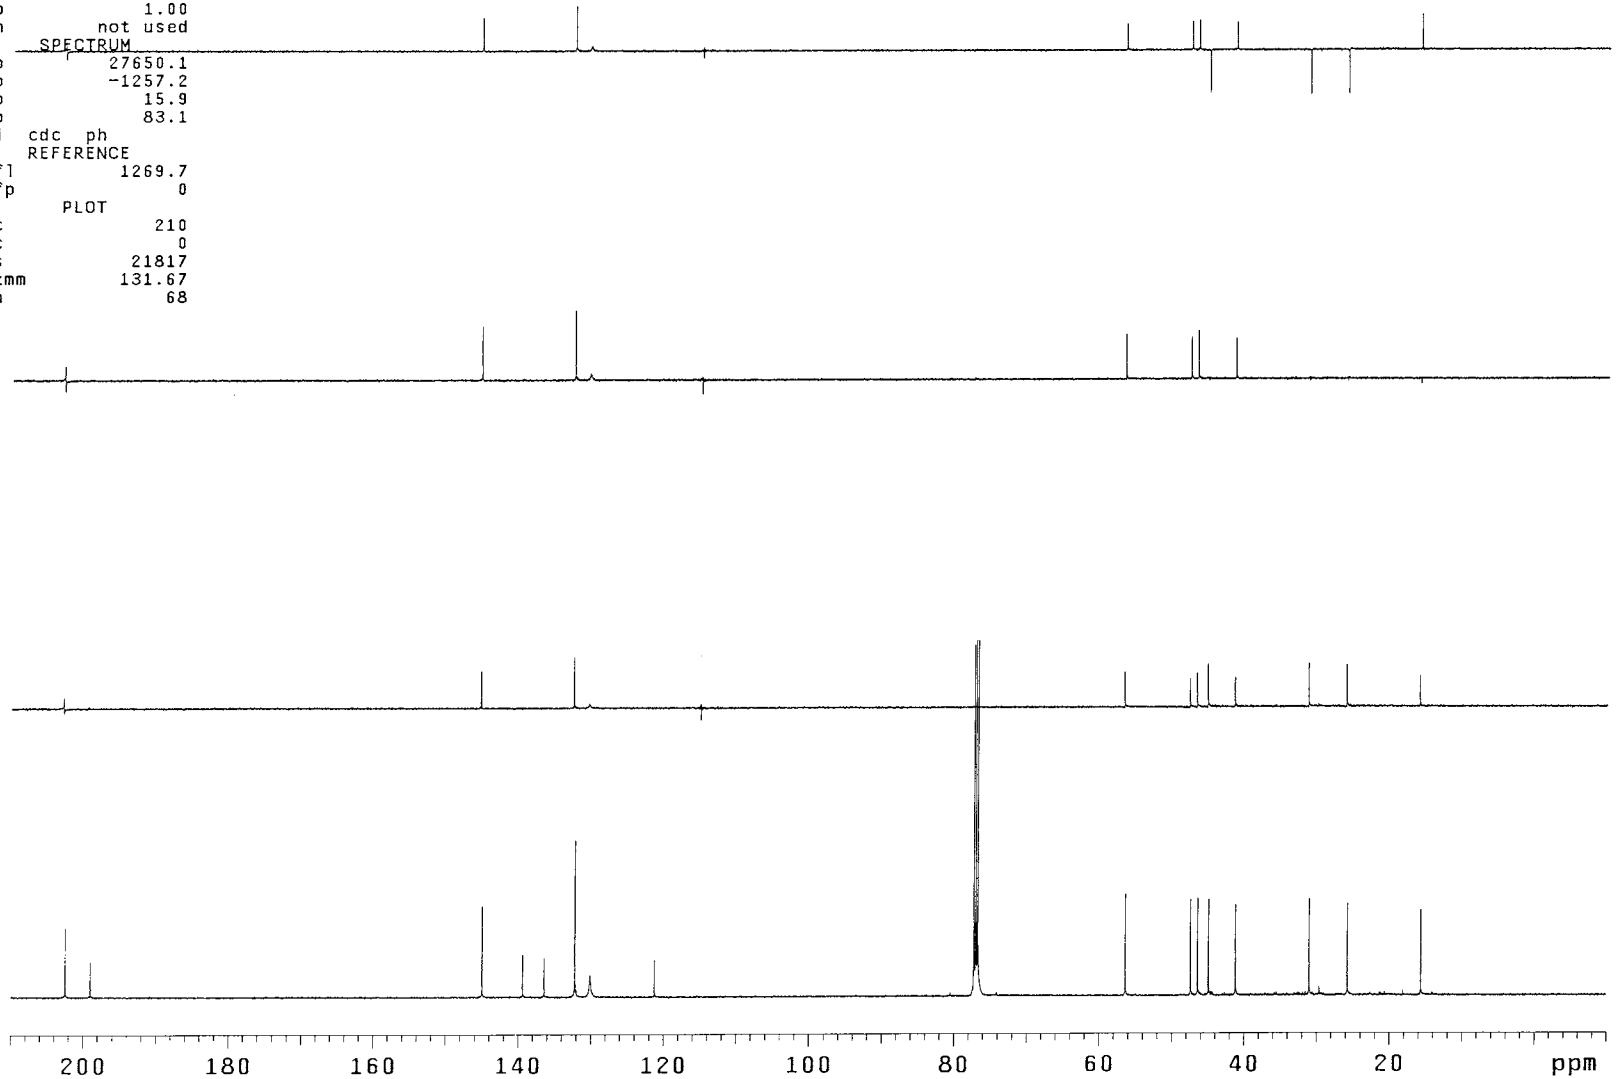

Fig S74. COSY of 5j (CDCl3).

RYN-2-145

exp24 gCOSY

| SAMPLE         |             | FLAGS         |          |
|----------------|-------------|---------------|----------|
| date           | Nov 28 2008 | hs            | nn       |
| solvent        | cdcl3       | sspul         | n        |
| sample         | undefined   | hsglv1        | 1026     |
| ACQUISITION    |             | SPECIAL       |          |
| sw             | 4698.4      | temp          | not used |
| at             | 0.218       | gain          | 28       |
| np             | 2048        | spin          | 0        |
| fb             | 3000        | F2 PROCESSING |          |
| ss             | 16          | sb            | -0.109   |
| d1             | 1.000       | sbs           | not used |
| nt             | 16          | fn            | 2048     |
| 2D ACQUISITION |             | F1 PROCESSING |          |
| sw1            | 4698.4      | sb1           | -0.027   |
| ni             | 128         | sbs1          | not used |
| TRANSMITTER    |             | proc1         |          |
| tn             | H1          | fn1           | 2048     |
| sfrq           | 499.836     | DISPLAY       |          |
| tof            | 149.9       | sp            | 294.1    |
| tpwr           | 57          | wp            | 4693.8   |
| pw             | 13.000      | sp1           | 298.0    |
| GRADIENTS      |             | wp1           | 4693.8   |
| gzlv11         | 1026        | rfl           | 2770.4   |
| gt1            | 0.001000    | rfp           | 3060.0   |
| gstab          | 0.000500    | rfl1          | 2766.5   |
| DECOUPLER      |             | rfp1          | 3060.0   |
| dn             | C13         | PLOT          |          |
| dm             | nnn         | wc            | 155.0    |
|                |             | sc            | 10.0     |
|                |             | wc2           | 155.0    |
|                |             | sc2           | 0        |
|                |             | vs            | 57       |
|                |             | th            | 6        |
|                |             | ai            | cdc av   |

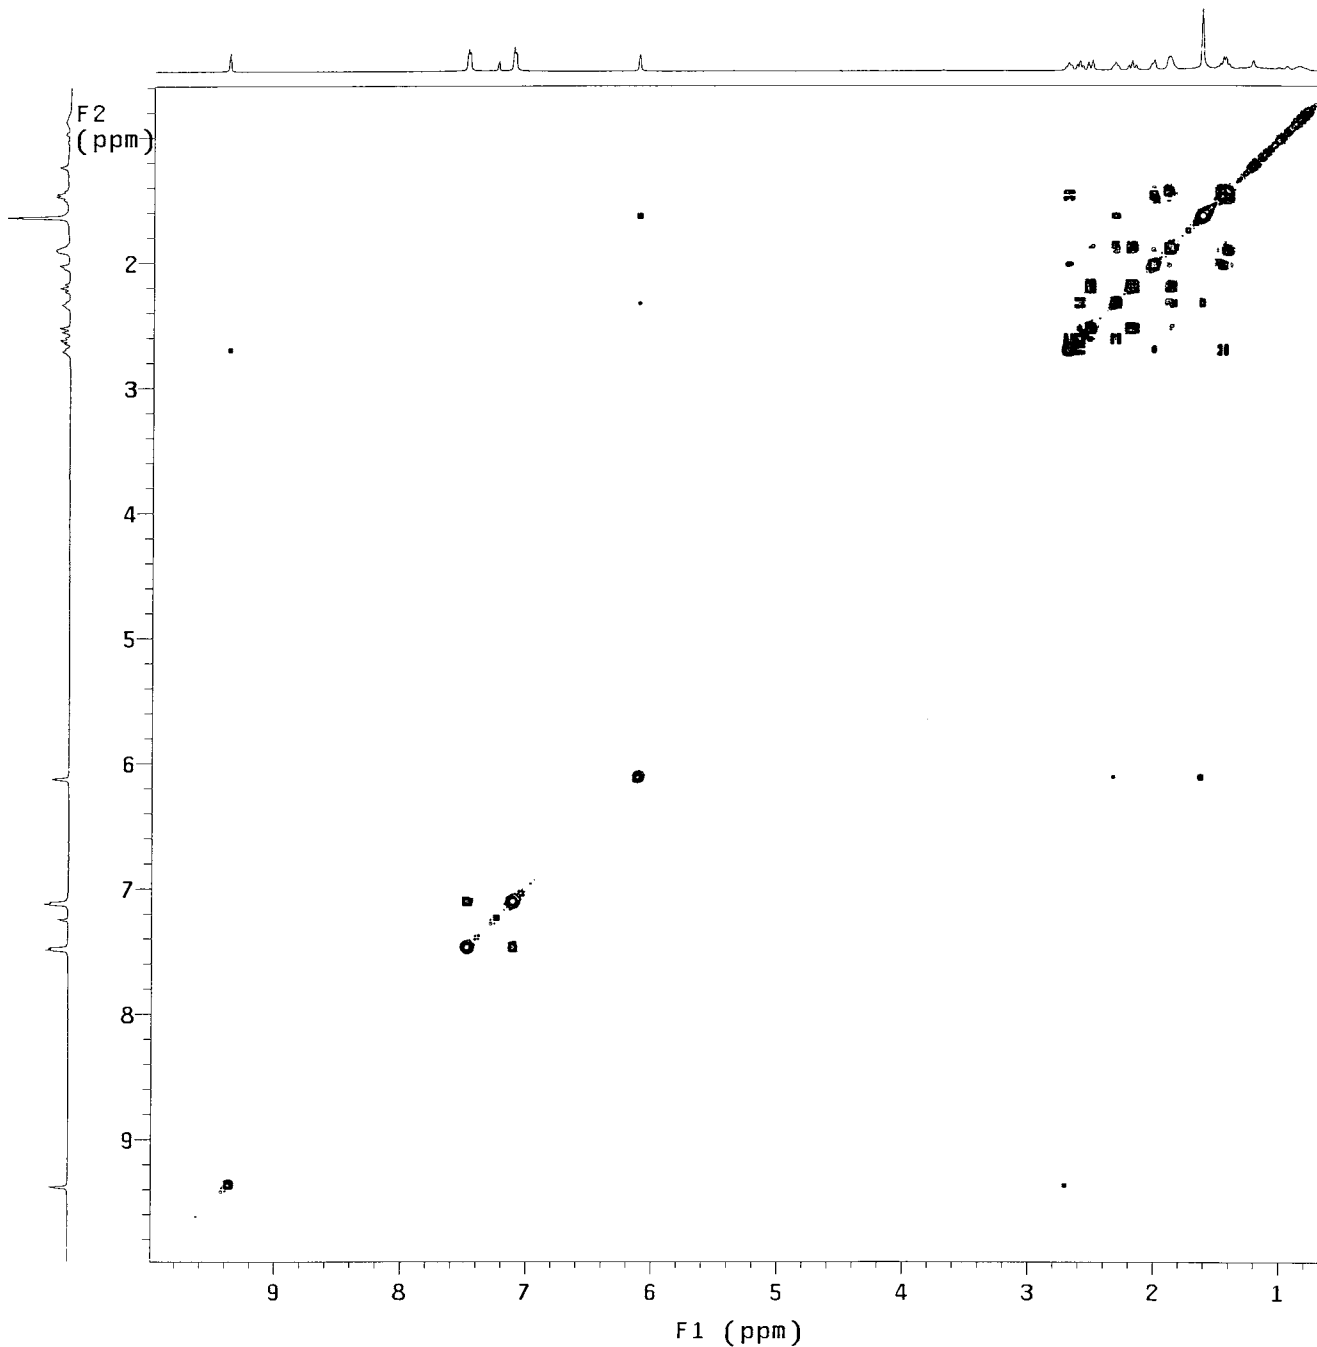

RYN-2-145

exp25 gHMQC

Fig S75. HMQC of 5j (CDCl3).

| SAMPLE         |             | FLAGS         | ACQUISITION | ARRAYS   |
|----------------|-------------|---------------|-------------|----------|
| date           | Nov 28 2008 | hs            | n           | array    |
| solvent        | cdcl3       | sspul         | y           | phase    |
| sample         | undefined   | PFGflg        | y           | arraydim |
| ACQUISITION    |             | hsglv1        | 1026        | phase    |
| sw             | 4698.4      | SPECIAL       | 1           | 1        |
| at             | 0.218       | temp          | not used    | 2        |
| np             | 2048        | gain          | 28          |          |
| fb             | 3000        | spin          | 0           |          |
| ss             | 32          | GRADIENTS     |             |          |
| d1             | 1.000       | gzlv11        | 1026        |          |
| nt             | 16          | gt1           | 0.001000    |          |
| 2D ACQUISITION |             | gzlv13        | 516         |          |
| sw1            | 21367.5     | gt3           | 0.001000    |          |
| ni             | 128         | gstab         | 0.000500    |          |
| phase          | arrayed     | F2 PROCESSING |             |          |
| TRANSMITTER    |             | gf            | 0.101       |          |
| tn             | H1          | gfs           | not used    |          |
| sfrq           | 499.836     | fn            | 2048        |          |
| tof            | 149.9       | F1 PROCESSING |             |          |
| tpwr           | 57          | gf1           | 0.006       |          |
| pw             | 13.000      | gfs1          | not used    |          |
| DECOUPLER      |             | proc1         | lp          |          |
| dn             | C13         | fn1           | 2048        |          |
| dof            | -2515.1     | DISPLAY       |             |          |
| dm             | nny         | sp            | 457.9       |          |
| dmm            | ccp         | wp            | 3546.8      |          |
| dmf            | 32258       | sp1           | 1637.1      |          |
| dpwr           | 35          | wp1           | 16943.8     |          |
| pwxlv1         | 51          | rfl           | 2762.6      |          |
| pwx            | 14.700      | rfp           | 3060.0      |          |
| HMQC           |             | rfl1          | 19523.7     |          |
| j1xh           | 140.0       | rfp1          | 18218.7     |          |
| nullflg        | y           | PLOT          |             |          |
|                |             | wc            | 150.0       |          |
|                |             | sc            | 6.2         |          |
|                |             | wc2           | 116.2       |          |
|                |             | sc2           | 0           |          |
|                |             | vs            | 57          |          |
|                |             | th            | 5           |          |
|                |             | ai            | cdc ph      |          |

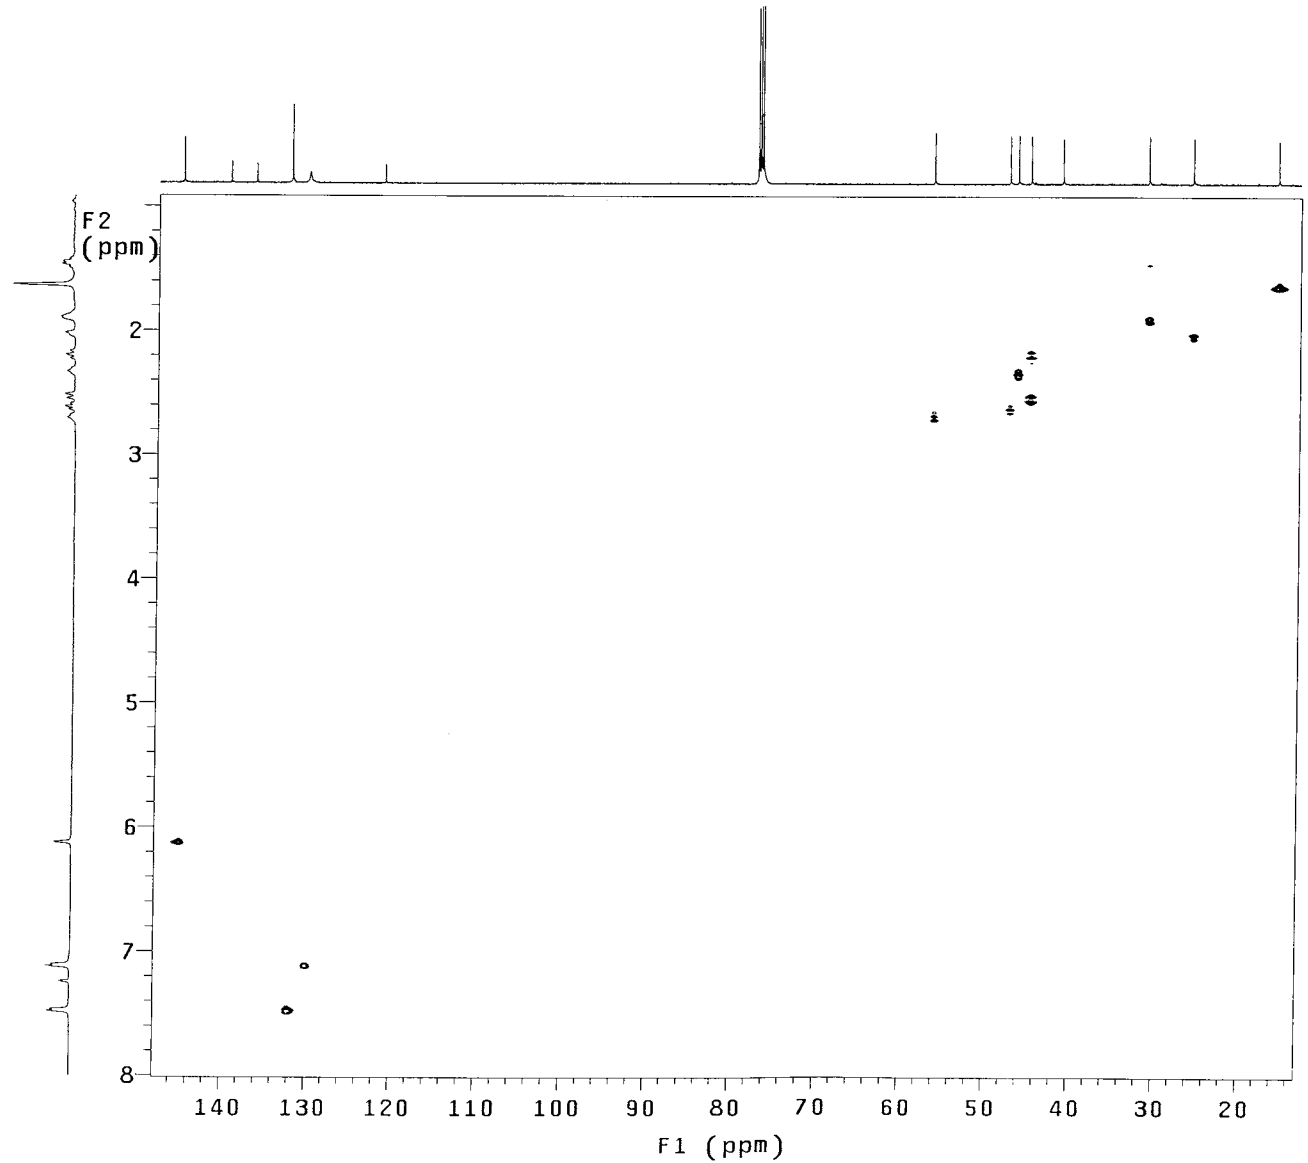

Fig S76. NOESY of 5j (CDCl<sub>3</sub>).

RYN-2-145

exp26 NOESY

| SAMPLE         |             | FLAGS         |          |
|----------------|-------------|---------------|----------|
| date           | Nov 28 2008 | hs            | n        |
| solvent        | cdcl3       | sspul         | y        |
| sample         | undefined   | PFGflg        | y        |
| ACQUISITION    |             | hsglvl        | 1026     |
| sw             | 4698.4      | SPECIAL       |          |
| at             | 0.218       | temp          | not used |
| np             | 2048        | gain          | 20       |
| fb             | 3000        | spin          | 0        |
| ss             | 32          | F2 PROCESSING |          |
| d1             | 1.000       | gf            | 0.101    |
| nt             | 8           | gfs           | not used |
| 2D ACQUISITION |             | fn            | 2048     |
| sw1            | 4698.4      | F1 PROCESSING |          |
| ni             | 200         | gf1           | 0.039    |
| TRANSMITTER    |             | gfs1          | not used |
| tn             | H1          | procl         | lp       |
| sfrq           | 499.836     | fn1           | 2048     |
| tof            | 149.9       | DISPLAY       |          |
| tpwr           | 57          | sp            | 294.0    |
| pw             | 13.000      | wp            | 4693.8   |
| NOESY          |             | sp1           | 297.9    |
| mix            | 0.200       | wp1           | 4693.8   |
| PRESATURATION  |             | rfl           | 2770.5   |
| satmode        | nnnn        | rfp           | 3060.0   |
| satpwr         | 0           | rfl1          | 2766.6   |
| satdly         | 0           | rfp1          | 3060.0   |
| satfrq         | 0           | PLOT          |          |
| DECOUPLER      |             | wc            | 155.0    |
| dn             | C13         | sc            | 10.0     |
| dm             | nnn         | wc2           | 155.0    |
|                |             | sc2           | 0        |
|                |             | vs            | 57       |
|                |             | th            | 1        |
|                |             | ai            | ph       |

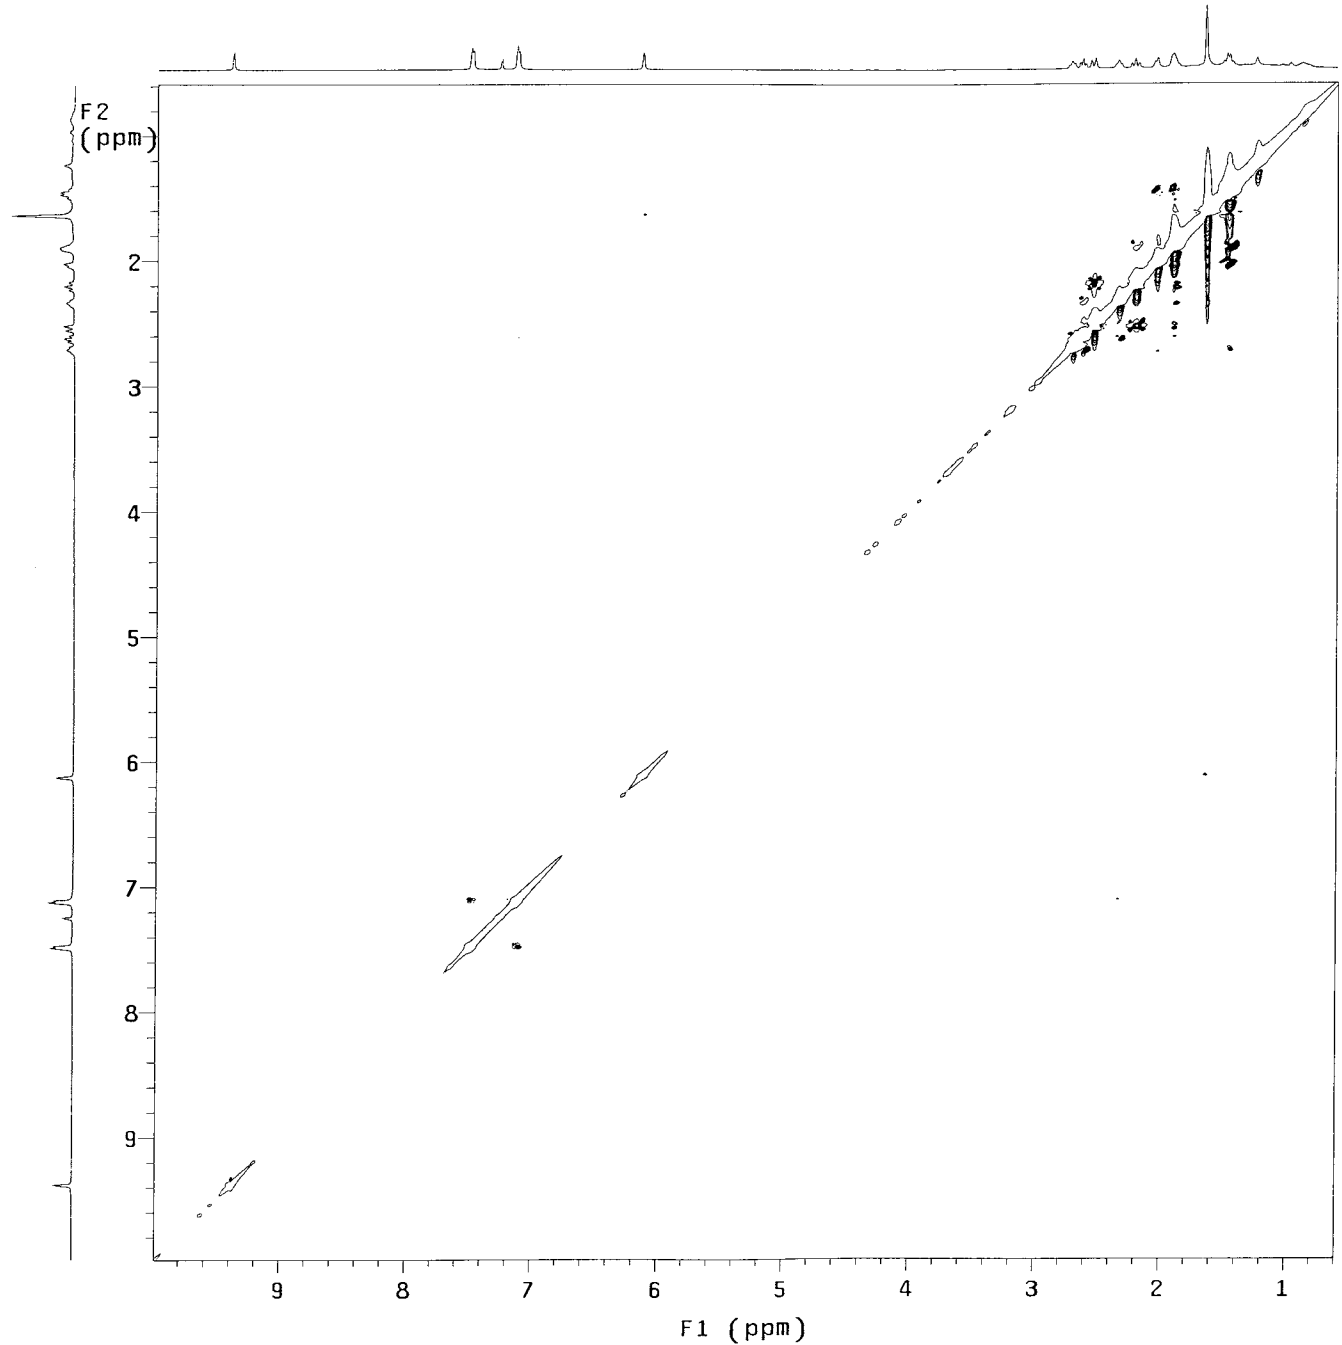

Fig S77. <sup>1</sup>H NMR of compound 6 (500 MHz, CDCl<sub>3</sub>).

S77

RYN-2-148

exp24 s2pu1

|             |            |            |          |
|-------------|------------|------------|----------|
| SAMPLE      |            | DEC. & VT  |          |
| date        | Dec 3 2008 | dfrq       | 125.695  |
| solvent     | cdc13      | dn         | C13      |
| file        | exp        | dpwr       | 30       |
| ACQUISITION |            | dof        | 0        |
| sfrq        | 499.836    | dm         | nnn      |
| tn          | H1         | dmm        | c        |
| at          | 3.000      | dmf        | 200      |
| np          | 48000      | dseq       |          |
| sw          | 8000.0     | dres       | 1.0      |
| fb          | 4000       | homo       | n        |
| bs          | 4          | PROCESSING |          |
| tpwr        | 57         | wtfile     |          |
| pw          | 4.8        | proc       | ft       |
| d1          | 1.000      | fn         | not used |
| tof         | 499.7      | math       | f        |
| nt          | 4          |            |          |
| ct          | 4          | werr       | react    |
| alock       | y          | wexp       | procplot |
| gain        | not used   | wbs        |          |
| FLAGS       |            | wnt        | wft      |
| il          | n          |            |          |
| in          | n          |            |          |
| dp          | y          |            |          |
| hs          | nn         |            |          |
| DISPLAY     |            |            |          |
| sp          | -250.1     |            |          |
| wp          | 4998.3     |            |          |
| vs          | 38         |            |          |
| sc          | 0          |            |          |
| wc          | 210        |            |          |
| hzmm        | 23.80      |            |          |
| is          | 92.02      |            |          |
| rfl         | 4626.0     |            |          |
| rfp         | 3618.8     |            |          |
| th          | 7          |            |          |
| ins         | 100.000    |            |          |
| nm          | ph         |            |          |

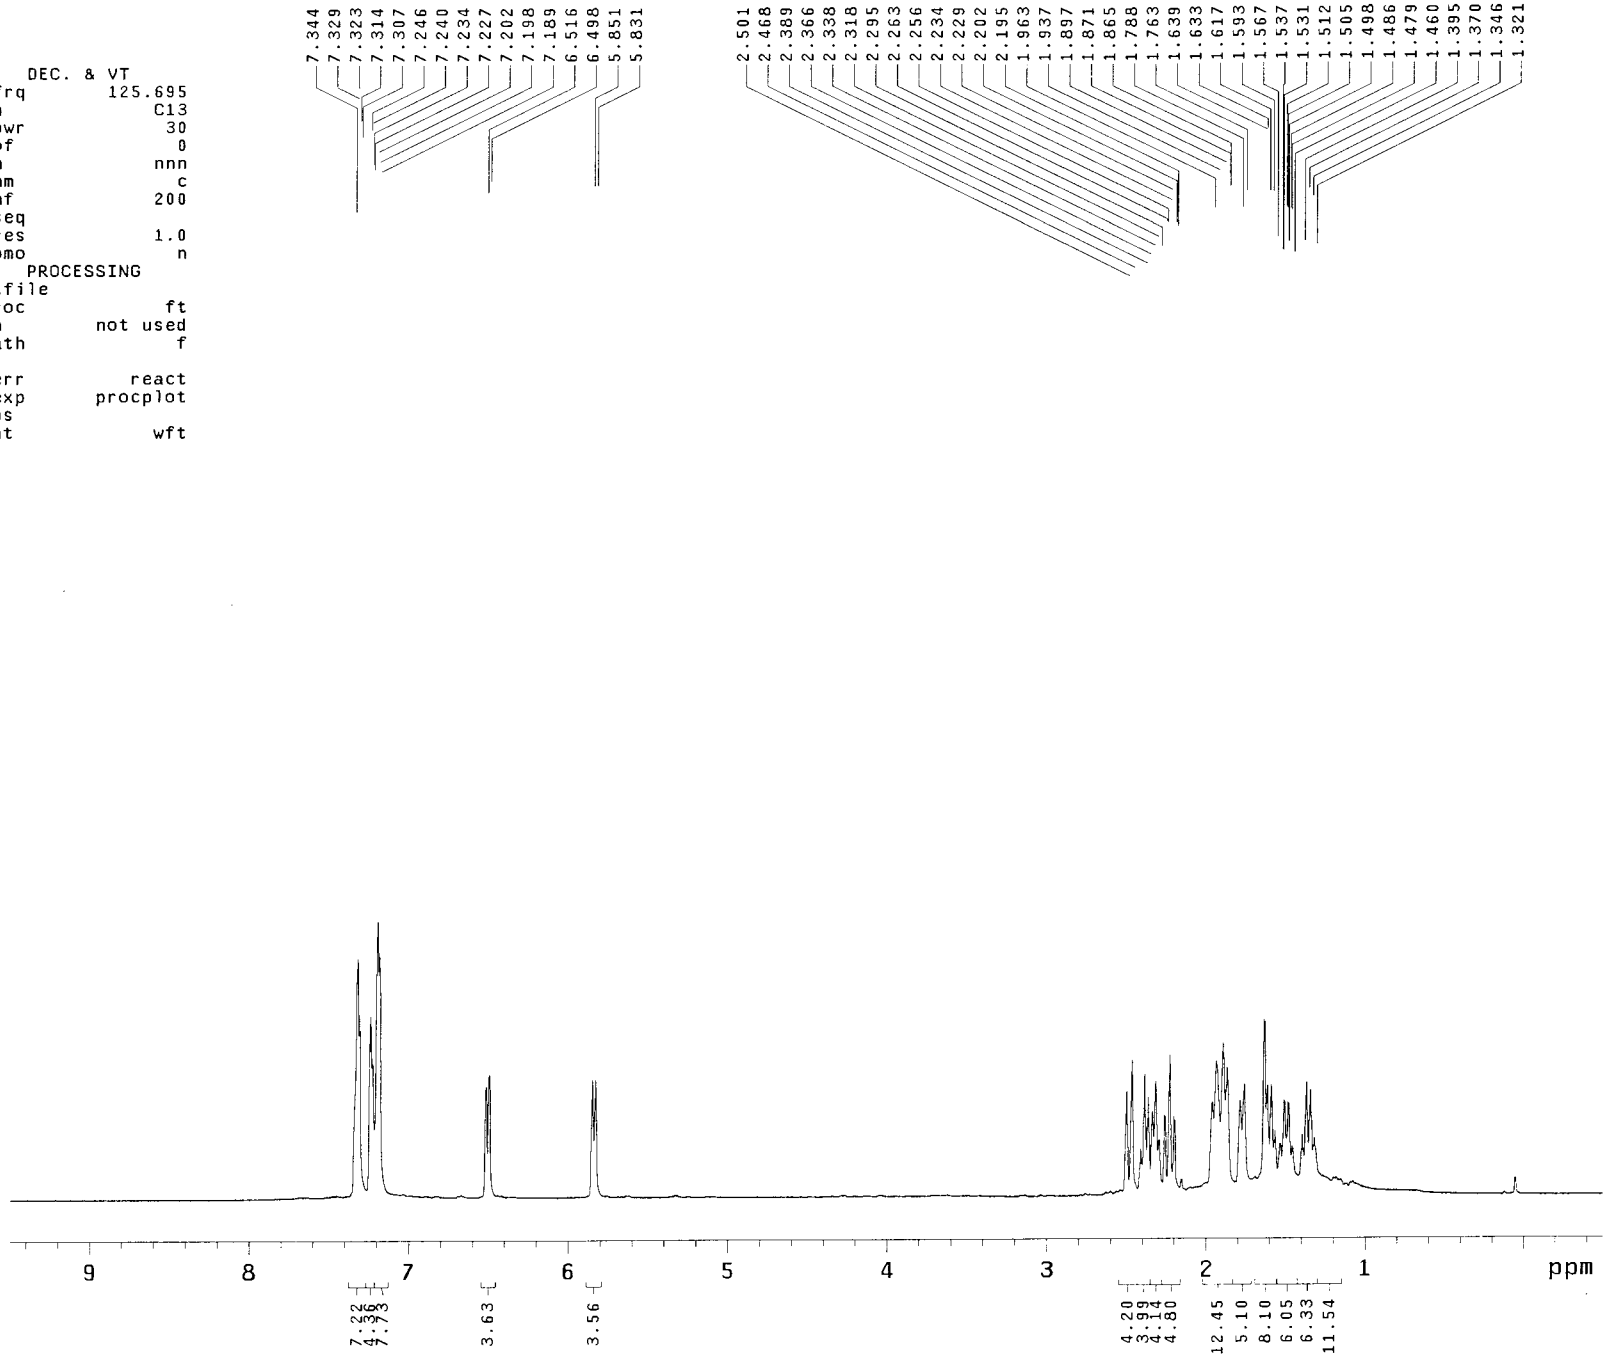

RYN-2-148  
exp26 s2pu1

|             |            |            |          |
|-------------|------------|------------|----------|
| date        | Dec 3 2008 | dfrq       | 499.836  |
| solvent     | cdcl3      | dn         | H1       |
| file        | exp        | dpwr       | 39       |
| ACQUISITION |            |            |          |
| sfrq        | 125.698    | dm         | yyy      |
| tn          | C13        | dmm        | w        |
| at          | 1.000      | dmf        | 11905    |
| np          | 62894      | dseq       |          |
| sw          | 31446.5    | dres       | 1.0      |
| fb          | 17000      | homo       | n        |
| bs          | 16         | PROCESSING |          |
| ss          | 2          | lb         | 1.00     |
| tpwr        | 54         | wtfile     |          |
| pw          | 4.0        | proc       | ft       |
| d1          | 1.000      | fn         | not used |
| tof         | 2512.2     | math       | f        |
| nt          | 20000      |            |          |
| ct          | 20000      | werr       | react    |
| alock       | y          | wexp       | procplot |
| gain        | not used   | wbs        | testsn   |
| FLAGS       |            |            |          |
| il          | n          | wnt        |          |
| in          | n          |            |          |
| dp          | y          |            |          |
| hs          | nn         |            |          |
| DISPLAY     |            |            |          |
| sp          | -1256.9    |            |          |
| wp          | 27650.1    |            |          |
| vs          | 113        |            |          |
| sc          | 0          |            |          |
| wc          | 210        |            |          |
| hzmm        | 131.67     |            |          |
| is          | 500.00     |            |          |
| rfl         | 10980.6    |            |          |
| rfp         | 9677.6     |            |          |
| th          | 7          |            |          |
| ins         | 100.000    |            |          |
| nm          | ph         |            |          |

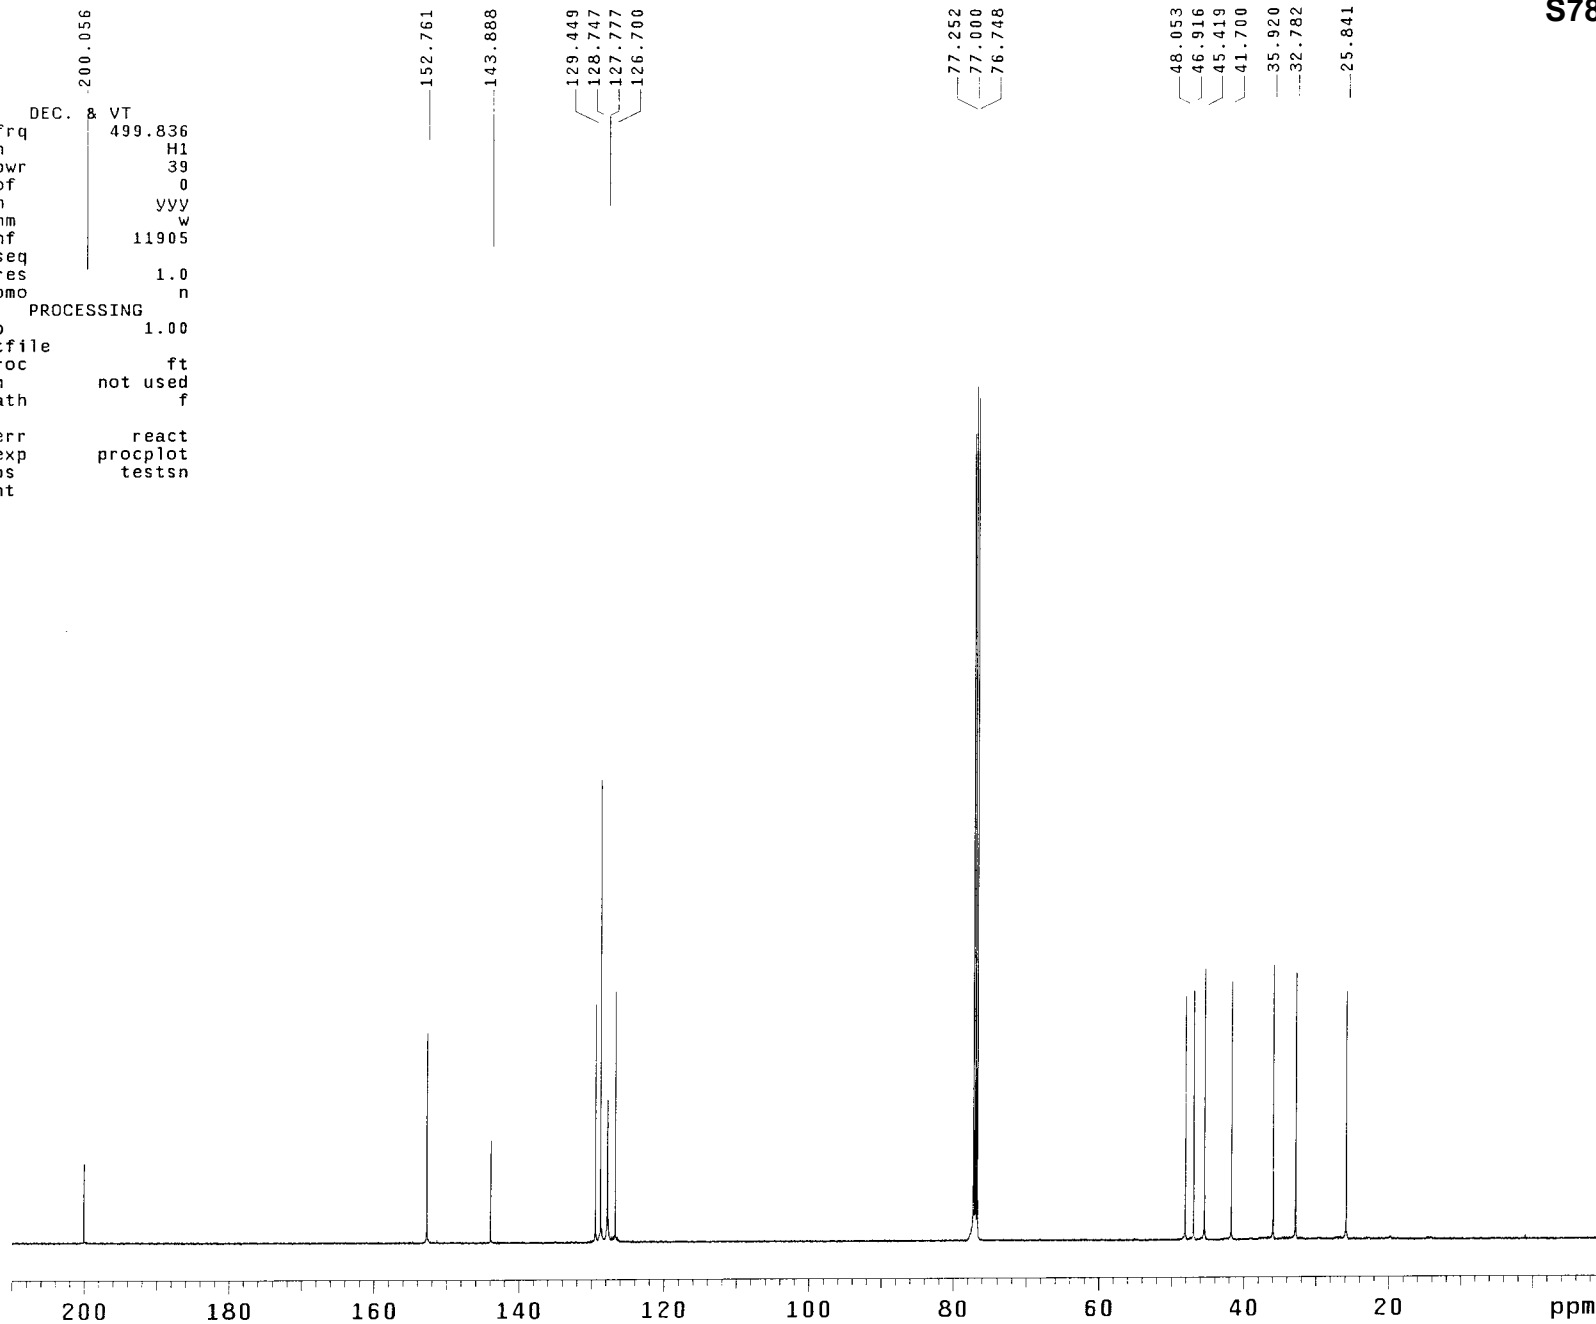

Fig S78. <sup>13</sup>C NMR of compound 6 (125 MHz, CDCl<sub>3</sub>).

Fig S79. DEPT of compound 6 (CDCl<sub>3</sub>).

RYN-2-148

exp25 DEPT

| SAMPLE      |            | DEPT          | ACQUISITION ARRAYS |      |
|-------------|------------|---------------|--------------------|------|
| date        | Dec 3 2008 | j1xh 140.0    | array              | mult |
| solvent     | cdc13      | mult arrayed  | arraydim           | 3    |
| sample      | undefined  | SPECIAL       |                    |      |
| ACQUISITION |            | temp not used | i                  | mult |
| sw          | 31446.5    | gain 28       | 1                  | 0.5  |
| at          | 1.000      | spin 0        | 2                  | 1    |
| np          | 62894      | PROCESSING    | 3                  | 1.5  |
| bs          | 16         | lb 1.00       |                    |      |
| ss          | -4         | fn not used   |                    |      |
| d1          | 1.000      | SPECTRUM      |                    |      |
| nt          | 750        | wp 27650.1    |                    |      |
| ct          | 750        | sp -1257.2    |                    |      |
| TRANSMITTER |            | rp 34.7       |                    |      |
| tn          | C13        | lp 73.2       |                    |      |
| tof         | 2512.2     | ai cdc ph     |                    |      |
| tpwr        | 54         | REFERENCE     |                    |      |
| pw          | 9.400      | rfl 1269.7    |                    |      |
| DECOUPLER   |            | rfp 0         |                    |      |
| dn          | H1         | PLOT          |                    |      |
| dof         | 0          | wc 210        |                    |      |
| dpwr        | 39         | sc 0          |                    |      |
| dm          | nny        | vs 225        |                    |      |
| dmm         | ccw        | hzmm 131.67   |                    |      |
| dmf         | 11905      | th 68         |                    |      |
| pp1v1       | 49         |               |                    |      |
| pp          | 29.400     |               |                    |      |

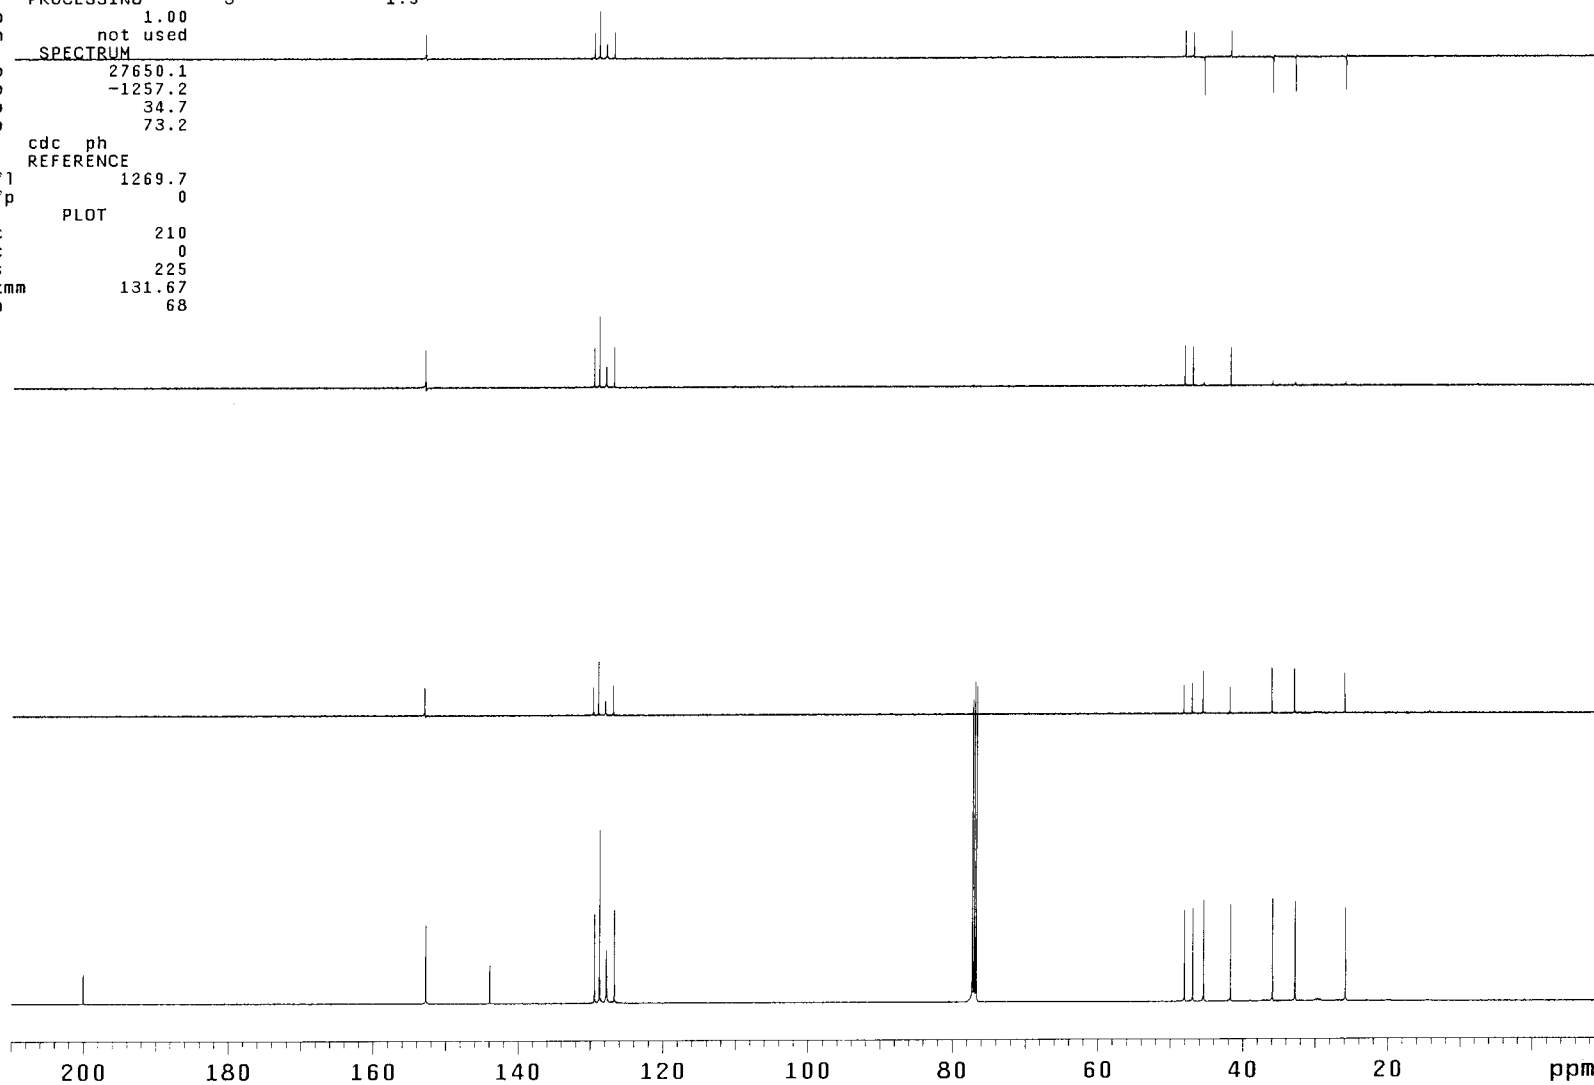

Fig S80. COSY of compound 6 (CDCl3).

RYN-2-148

exp27 gCOSY

|                |            |               |          |
|----------------|------------|---------------|----------|
| SAMPLE         |            | FLAGS         |          |
| date           | Dec 3 2008 | hs            | nn       |
| solvent        | cdc13      | sspul         | n        |
| sample         | undefined  | hsglv1        | 1026     |
| ACQUISITION    |            | SPECIAL       |          |
| sw             | 3698.7     | temp          | not used |
| at             | 0.138      | gain          | 28       |
| np             | 1024       | spin          | 0        |
| fb             | 2000       | F2 PROCESSING |          |
| ss             | 16         | sb            | -0.069   |
| d1             | 1.000      | sbs           | not used |
| nt             | 16         | fn            | 1024     |
| 2D ACQUISITION |            | F1 PROCESSING |          |
| sw1            | 3698.7     | sb1           | -0.035   |
| ni             | 128        | sbs1          | not used |
| TRANSMITTER    |            | proc1         |          |
| tn             | H1         | fn1           | 1024     |
| sfrq           | 499.835    | DISPLAY       |          |
| tof            | -350.0     | sp            | 301.1    |
| tpwr           | 57         | wp            | 3691.5   |
| pw             | 13.000     | sp1           | 299.9    |
| GRADIENTS      |            | wp1           | 3691.5   |
| gzlv11         | 1026       | rfl           | 2625.1   |
| gt1            | 0.001000   | rfp           | 2919.0   |
| gstab          | 0.000500   | rfl1          | 2626.4   |
| DECOUPLER      |            | rfl1          | 2919.0   |
| dn             | C13        | PLOT          |          |
| dm             | nnn        | wc            | 155.0    |
|                |            | sc            | 10.0     |
|                |            | wc2           | 155.0    |
|                |            | sc2           | 0        |
|                |            | vs            | 32       |
|                |            | th            | 6        |
|                |            | ai            | cdc av   |

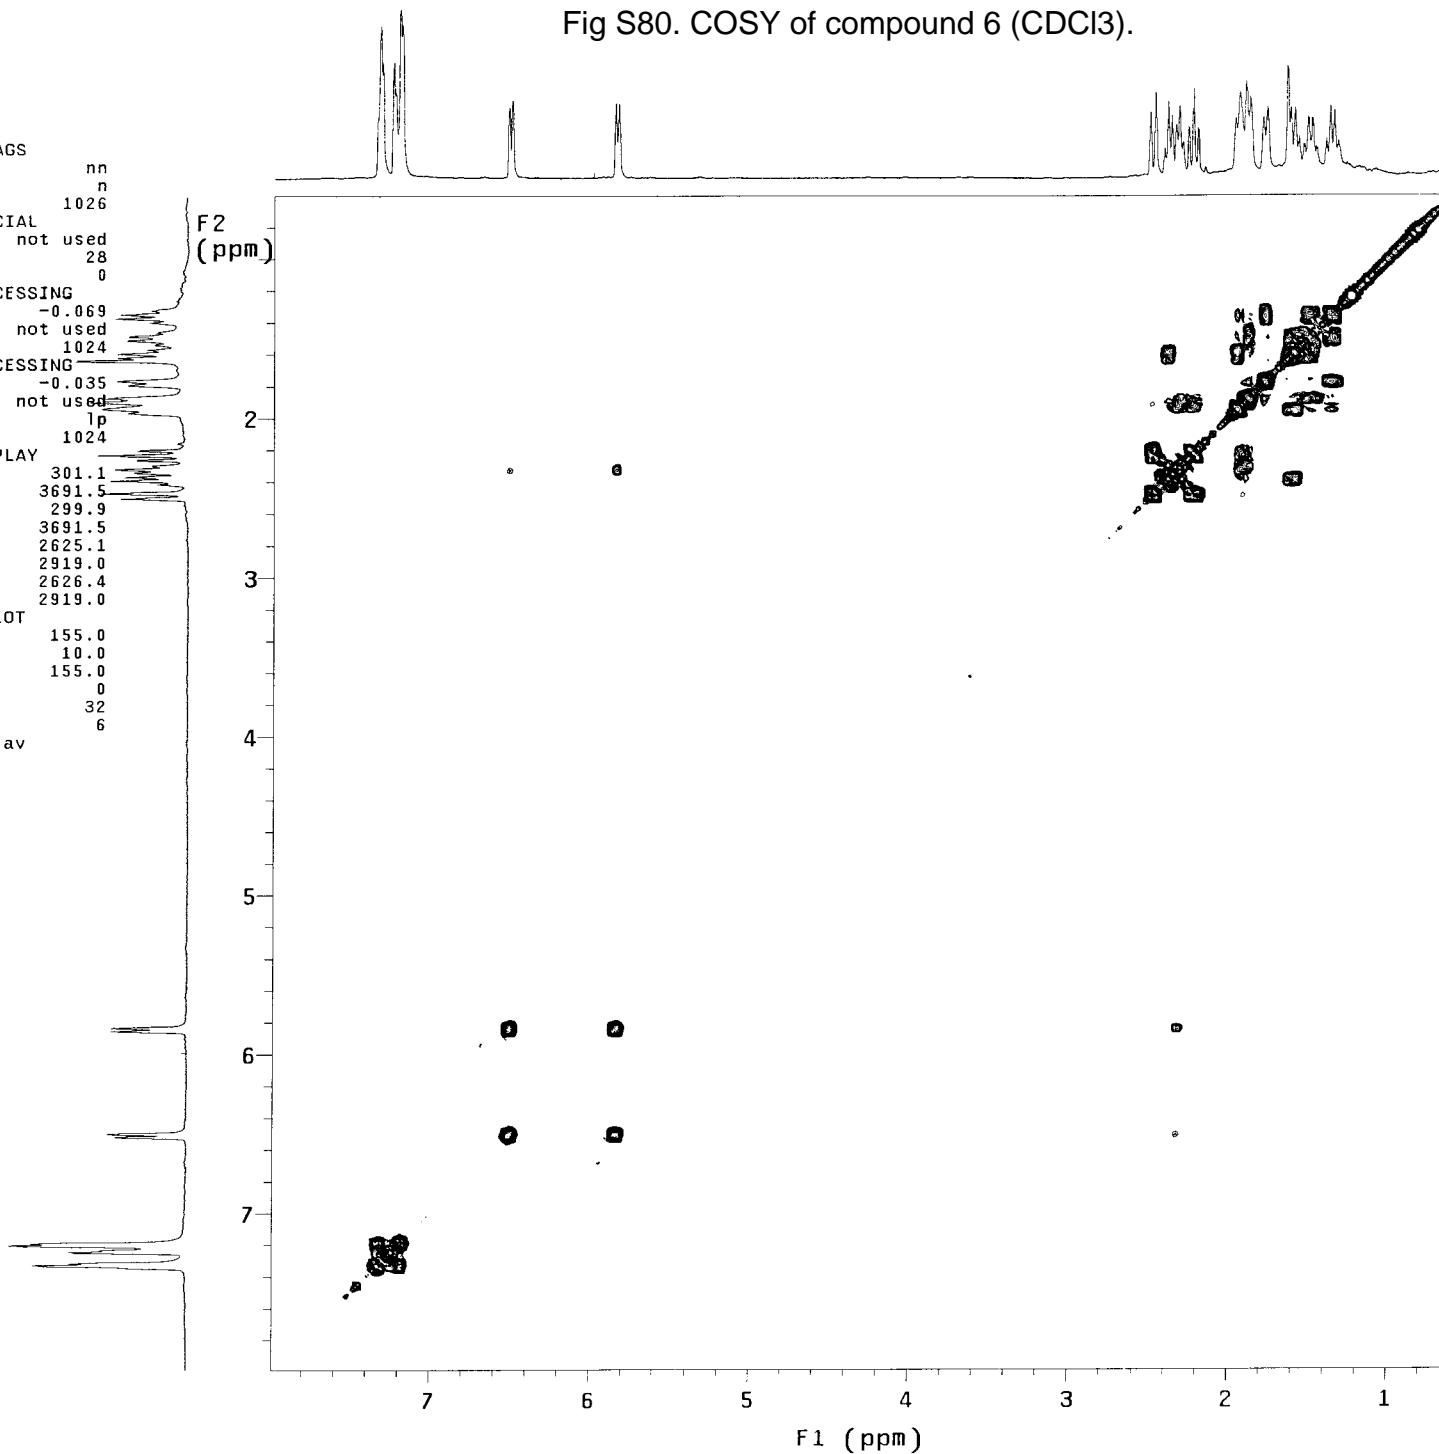

F1 (ppm)



Fig S81. HMQC of compound 6 (CDCl<sub>3</sub>).

RYN-2-148

exp28 gHMQC

| SAMPLE           | FLAGS         | ACQUISITION | ARRAYS       |
|------------------|---------------|-------------|--------------|
| date Dec 3 2008  | hs            | n           | array phase  |
| solvent cdcl3    | sspul         | y           | arraydim 256 |
| sample undefined | PFGflg        | y           |              |
| ACQUISITION      | hsglvl        | 1026        | i phase      |
| sw 3698.7        | SPECIAL       | 1           | 1            |
| at 0.138         | temp          | not used    | 2 2          |
| np 1024          | gain          | 28          |              |
| fb 2000          | spin          | 0           |              |
| ss 32            | GRADIENTS     |             |              |
| d1 1.000         | gzlv11        | 1026        |              |
| nt 16            | gt1           | 0.001000    |              |
| 2D ACQUISITION   | gzlv13        | 516         |              |
| sw1 21367.5      | gt3           | 0.001000    |              |
| ni 128           | gstab         | 0.000500    |              |
| phase arrayed    | F2 PROCESSING |             |              |
| TRANSMITTER      | gf            | 0.064       |              |
| tn H1            | gfs           | not used    |              |
| sfrq 499.835     | fn            | 1024        |              |
| tof -350.0       | F1 PROCESSING |             |              |
| tpwr 57          | gf1           | 0.006       |              |
| pw 13.000        | gfs1          | not used    |              |
| DECOUPLER        | proc1         | 1p          |              |
| dn C13           | fn1           | 2048        |              |
| dof -2515.1      | DISPLAY       |             |              |
| dm nny           | sp            | 439.0       |              |
| dmm ccp          | wp            | 3438.7      |              |
| dmf 32258        | sp1           | 2674.2      |              |
| dpwr 35          | wp1           | 17131.6     |              |
| px1vl 51         | rf1           | 2960.4      |              |
| pxw 14.700       | rfp           | 3254.9      |              |
| HMQC             | rf11          | 20510.9     |              |
| j1xh 140.0       | rfp1          | 19199.5     |              |
| nullflg y        | PLOT          |             |              |
|                  | wc            | 150.0       |              |
|                  | sc            | 6.2         |              |
|                  | wc2           | 116.2       |              |
|                  | sc2           | 0           |              |
|                  | vs            | 32          |              |
|                  | th            | 6           |              |
|                  | ai            | cdc ph      |              |

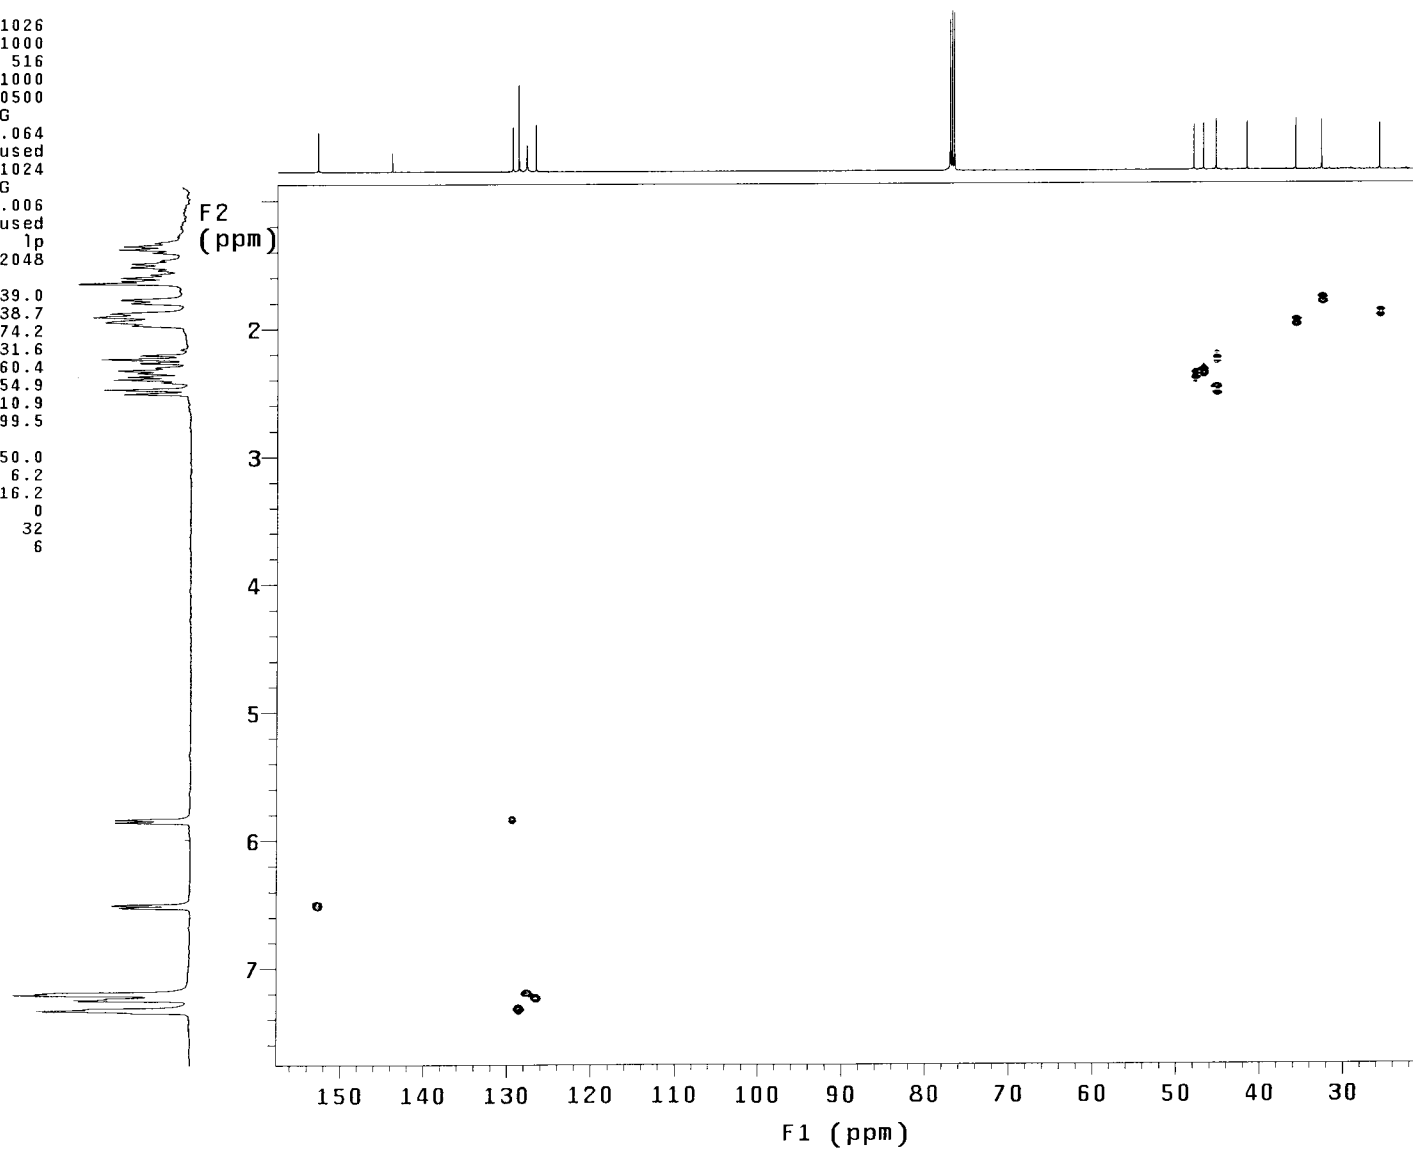

Fig S82. NOESY of compound 6 (CDCl<sub>3</sub>).

RYN-2-148

exp29 NOESY

| SAMPLE         |            | FLAGS         |          |      |
|----------------|------------|---------------|----------|------|
| date           | Dec 3 2008 | hs            |          | n    |
| solvent        | cdc13      | sspul         |          | y    |
| sample         | undefined  | PFGflg        |          | y    |
| ACQUISITION    |            | hsglv1        |          | 1026 |
| sw             | 3698.7     | SPECIAL       |          |      |
| at             | 0.138      | temp          | not used |      |
| np             | 1024       | gain          | 20       |      |
| fb             | 2000       | spin          | 0        |      |
| ss             | 32         | F2 PROCESSING |          |      |
| d1             | 1.000      | gf            | 0.064    |      |
| nt             | 8          | gfs           | not used |      |
| 2D ACQUISITION |            | fn            | 1024     |      |
| sw1            | 3698.7     | F1 PROCESSING |          |      |
| ni             | 200        | gf1           | 0.050    |      |
| TRANSMITTER    |            | gfs1          | not used |      |
| tn             | H1         | proc1         | lp       |      |
| sfrq           | 499.835    | fn1           | 1024     |      |
| tof            | -350.0     | DISPLAY       |          |      |
| tpwr           | 57         | sp            | 296.2    |      |
| pw             | 13.000     | wp            | 3691.5   |      |
| NOESY          |            | sp1           | 301.1    |      |
| mix            | 0.200      | wp1           | 3691.5   |      |
| PRESATURATION  |            | rfl           | 2630.0   |      |
| satmode        | nnnn       | rfp           | 2919.0   |      |
| satpwr         | 0          | rfl1          | 2625.1   |      |
| satdly         | 0          | rfp1          | 2919.0   |      |
| satfrq         | 0          | PLOT          |          |      |
| DECOUPLER      |            | wc            | 155.0    |      |
| dn             | C13        | sc            | 10.0     |      |
| dm             | nnn        | wc2           | 155.0    |      |
|                |            | sc2           | 0        |      |
|                |            | vs            | 32       |      |
|                |            | th            | 3        |      |
|                |            | ai            | ph       |      |

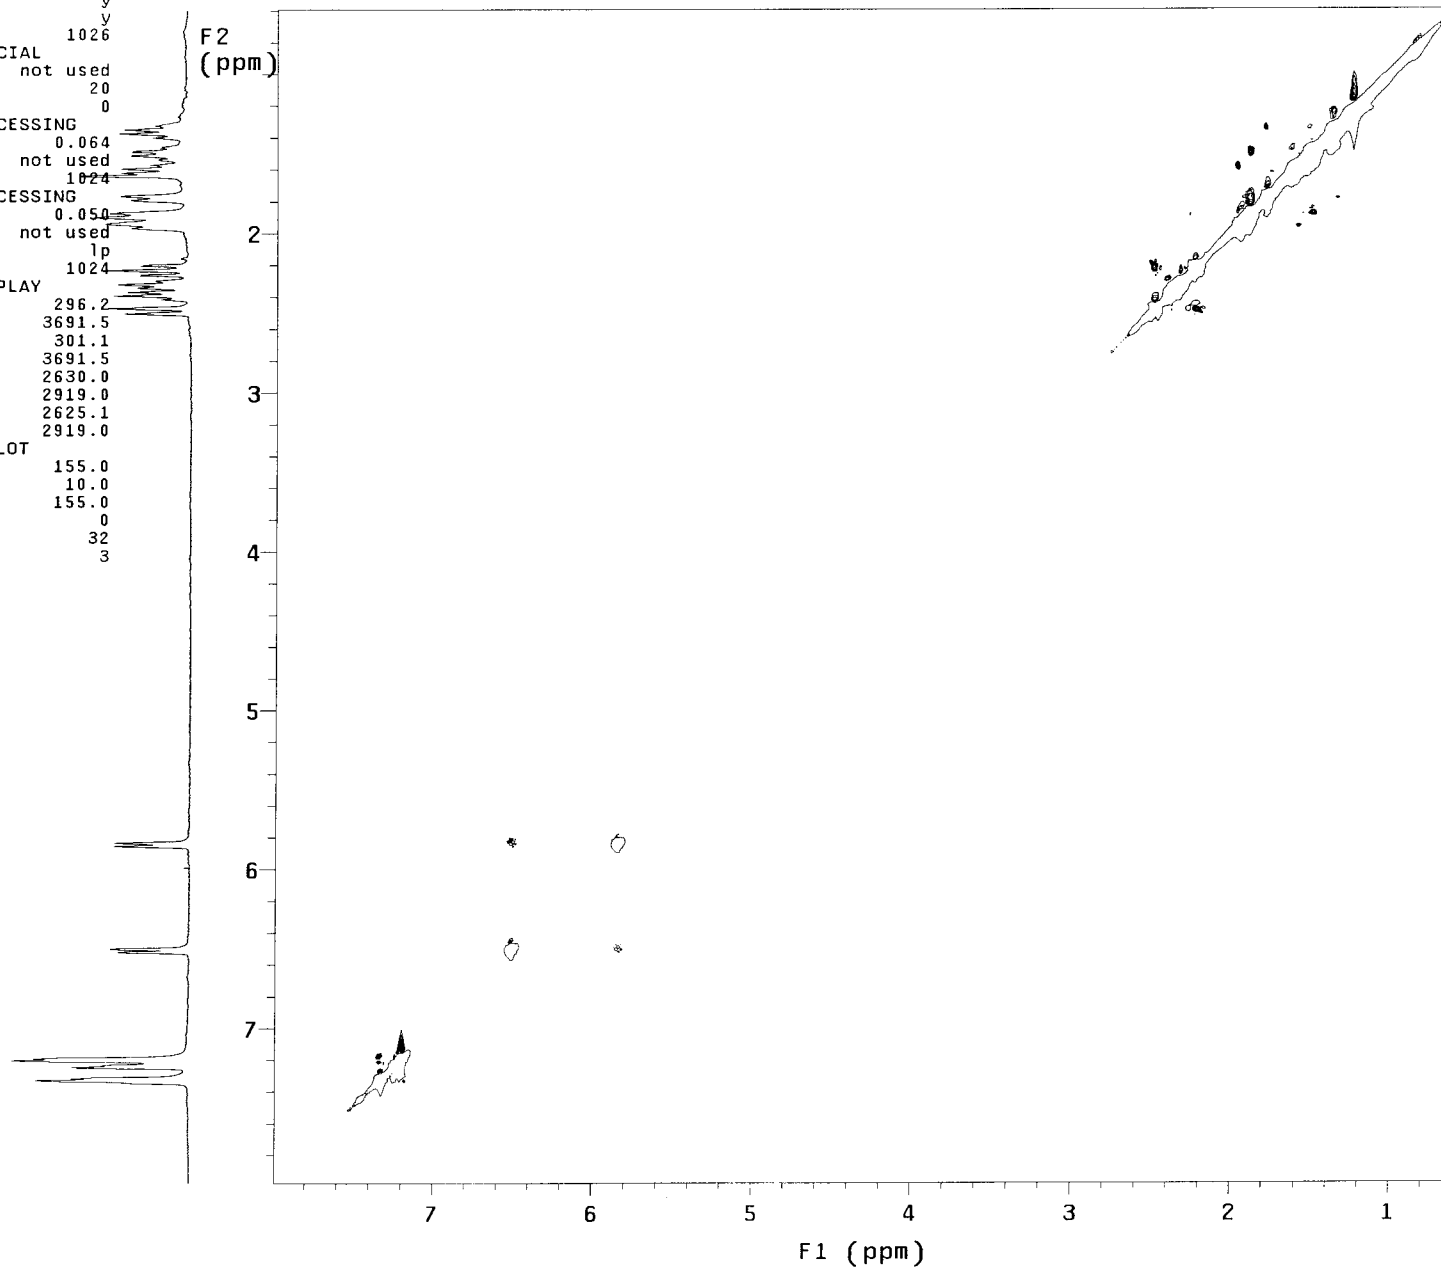

Fig S83. <sup>1</sup>H NMR of compound 7 (500 MHz, CDCl<sub>3</sub>).

RYN-2-153

exp2 s2pu1

```

SAMPLE          DEC. & VT
date    Dec 31 2008  dfrq      125.695
solvent  cdc13      dn        C13
file     exp       dpwr       30
ACQUISITION    dof        0
sfrq     499.836  dm         nnn
tn       H1       dmm        c
at       3.000   dmf       200
np       48000   dseq
sw       8000.0  dres      1.0
fb       4000   homo
bs       4
PROCESSING
tpwr     57     wtfile
pw       4.8   proc      ft
d1       1.000  fn        not used
tof      499.7  math      f
nt       4
ct       4     werr      react
alock    y     wexp     procp1ot
gain     not used  wbs
FLAGS    wnt      wft
il       n
in       n
dp       y
hs       nn
DISPLAY
sp       -250.1
wp       4998.3
vs       48
sc       0
wc       210
hzmm     23.80
is       67.22
rfl      4630.6
rfp      3618.8
th       7
ins      100.000
nm       cdc   ph
    
```

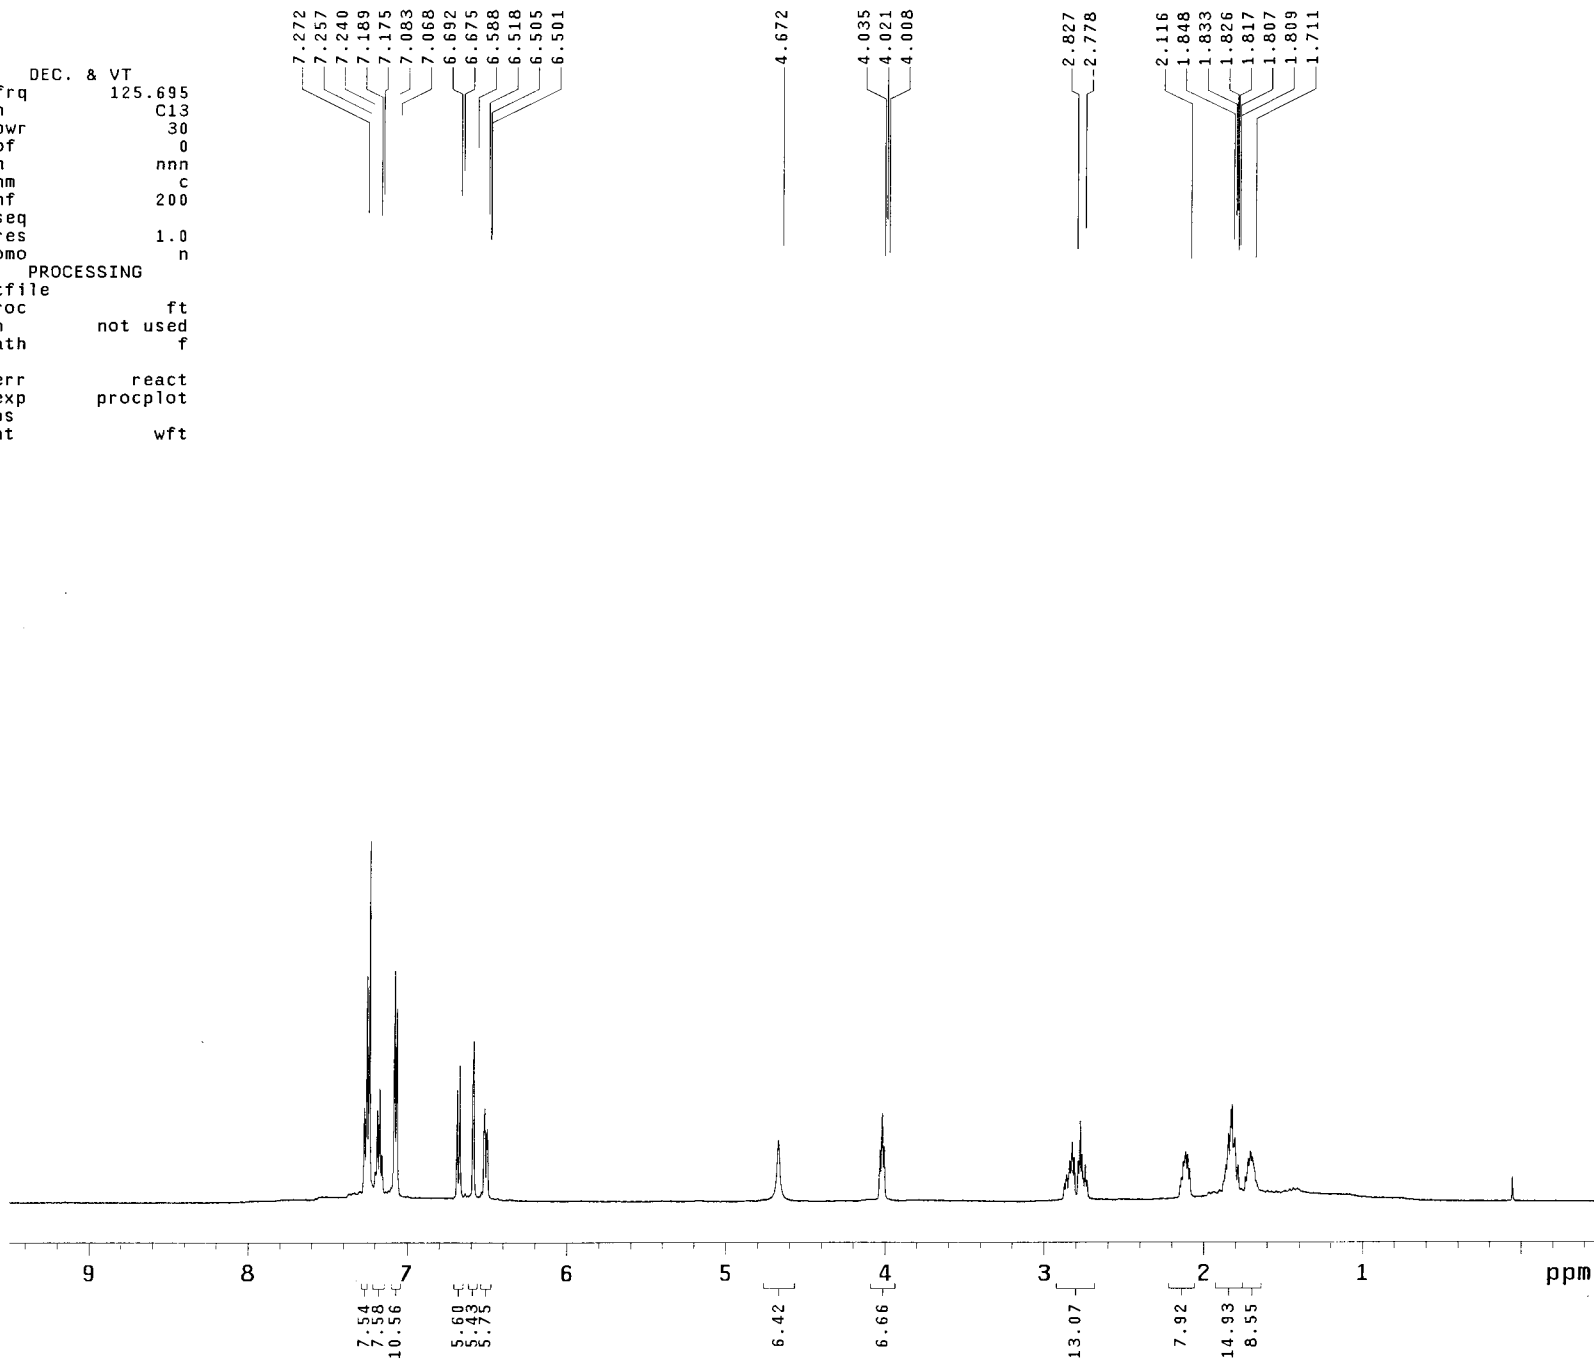

RYN-2-153

exp3 s2pu1

```
SAMPLE          DEC. & VT
date   Dec 31 2008   dfrq      499.836
solvent cdc13       dn         H1
file    exp         dpwr      39
ACQUISITION      dof        0
sfrq    125.698    dm         vvv
tn       C13       dmm        w
at       1.000     dmf       11905
np       62894     dseq
sw       31446.5   dres      1.0
fb       17000     homo      n
bs       16        PROCESSING
ss       2         lb         1.00
tpwr     54        wtfile
pw       4.0       proc
d1       1.000     fn         not used
tof      2512.2    math      f
nt       20000
ct       11600    werr      react
alock    y        wexp      proplot
gain     not used wbs        testsn
          FLAGS   wnt
il        n
in        n
dp        y
hs        nn
DISPLAY
sp        1256.5
wp        27650.1
vs        197
sc        0
wc        210
hzmm     131.67
is        500.00
rfl      10980.6
rfp      9677.6
th        8
ins      100.000
nm        ph
```

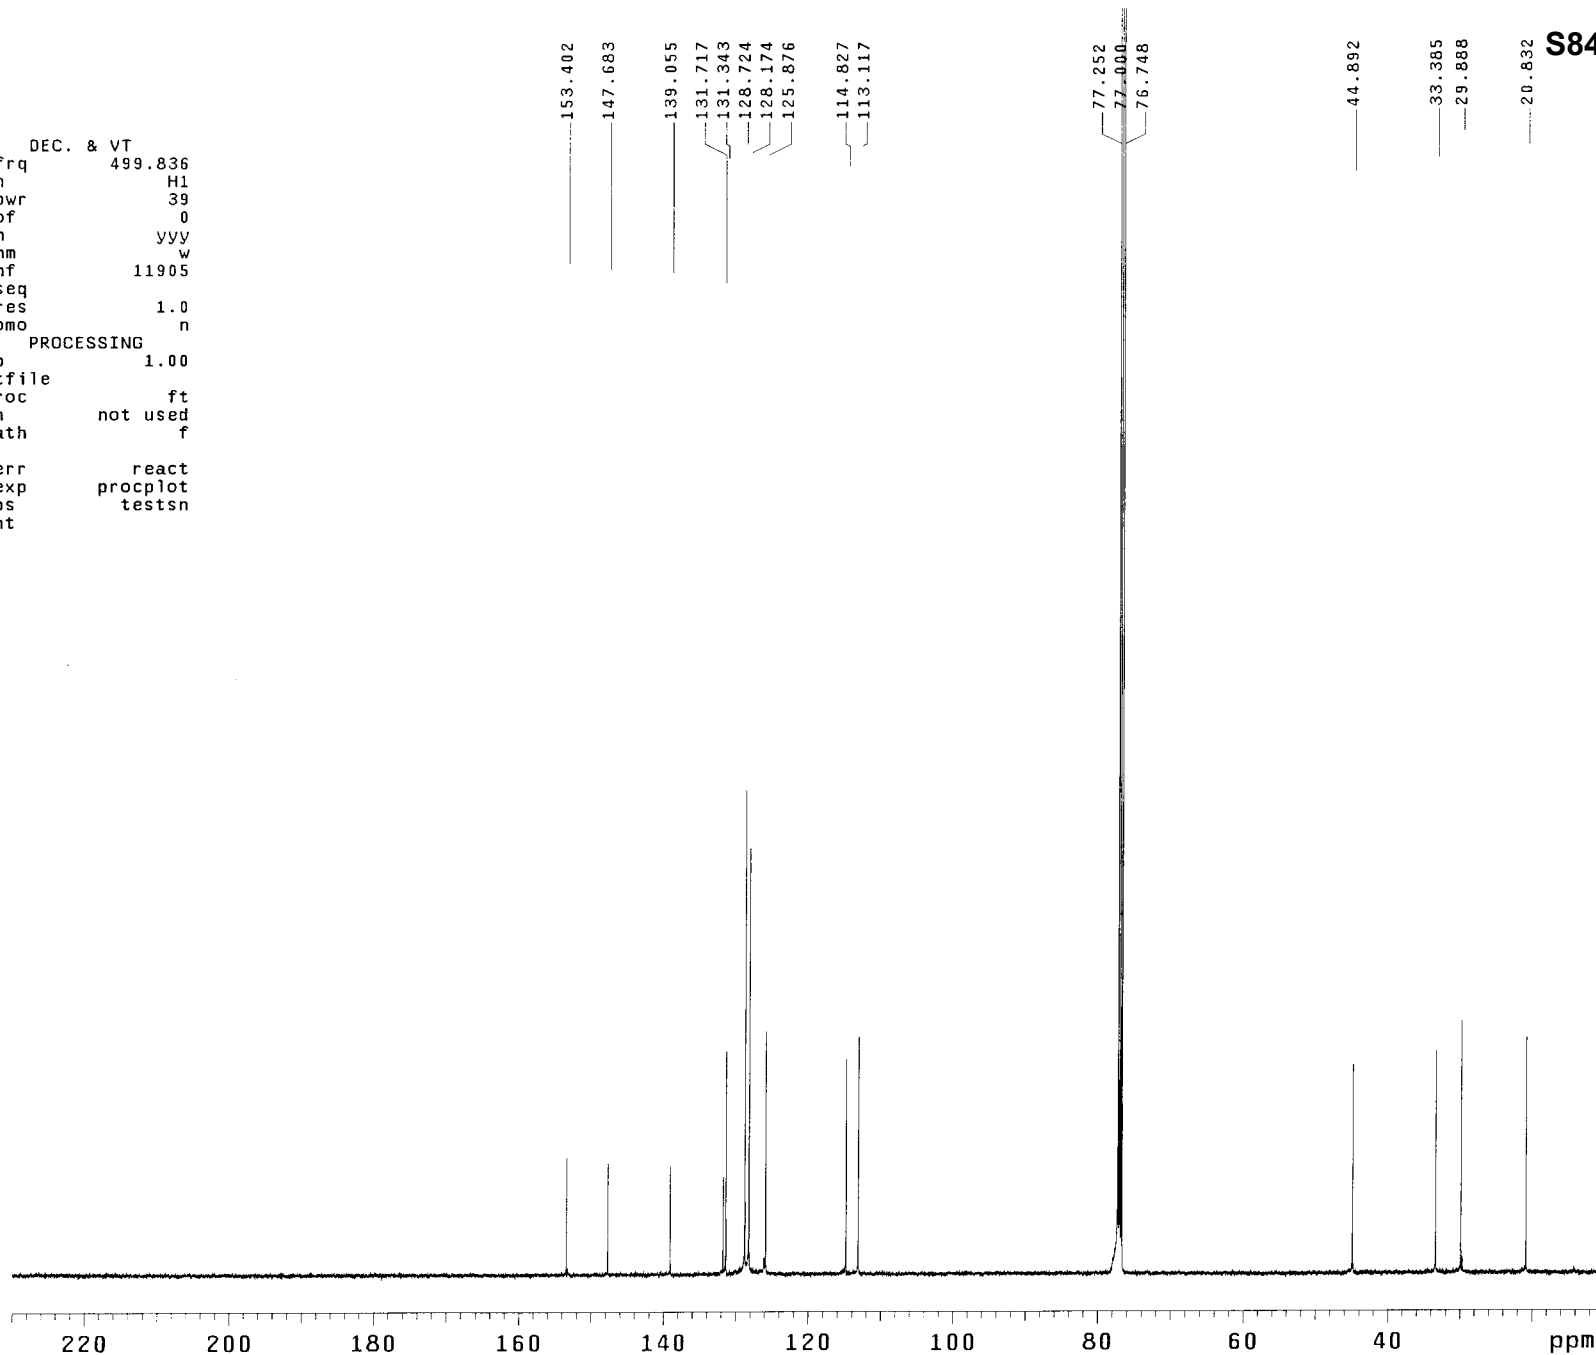

S84

Fig S84. <sup>13</sup>C NMR of compound 7 (125 MHz, CDCl<sub>3</sub>).

Fig S85. DEPT of compound 7 (CDCl<sub>3</sub>).

RYN-2-153

exp4 DEPT

| SAMPLE      |             | DEPT          | ACQUISITION ARRAYS |      |  |
|-------------|-------------|---------------|--------------------|------|--|
| date        | Dec 31 2008 | j1xh 140.0    | array              | mult |  |
| solvent     | cdcl3       | mult arrayed  | arraydim           | 3    |  |
| sample      | undefined   | SPECIAL       |                    |      |  |
| ACQUISITION |             | temp not used | i                  | mult |  |
| sw          | 31446.5     | gain 34       | 1                  | 0.5  |  |
| at          | 1.000       | spin 0        | 2                  | 1    |  |
| np          | 62894       | PROCESSING    | 3                  | 1.5  |  |
| bs          | 16          | lb 1.00       |                    |      |  |
| ss          | -4          | fn not used   |                    |      |  |
| d1          | 1.000       | SPECTRUM      |                    |      |  |
| nt          | 1800        | wp 27650.1    |                    |      |  |
| ct          | 1800        | sp 1256.2     |                    |      |  |
| TRANSMITTER |             | rp 28.4       |                    |      |  |
| tn          | C13         | lp 77.4       |                    |      |  |
| tof         | 2512.2      | ai cdc ph     |                    |      |  |
| tpwr        | 54          | REFERENCE     |                    |      |  |
| pw          | 9.400       | rfl 1269.7    |                    |      |  |
| DECOUPLER   |             | rfl 0         |                    |      |  |
| dn          | H1          | PLOT          |                    |      |  |
| dof         | 0           | wc 210        |                    |      |  |
| dpwr        | 39          | sc 0          |                    |      |  |
| dm          | nny         | vs 656        |                    |      |  |
| dmm         | ccw         | hzmm 131.67   |                    |      |  |
| dmf         | i1905       | th 68         |                    |      |  |
| pp1v1       | 49          |               |                    |      |  |
| pp          | 29.400      |               |                    |      |  |

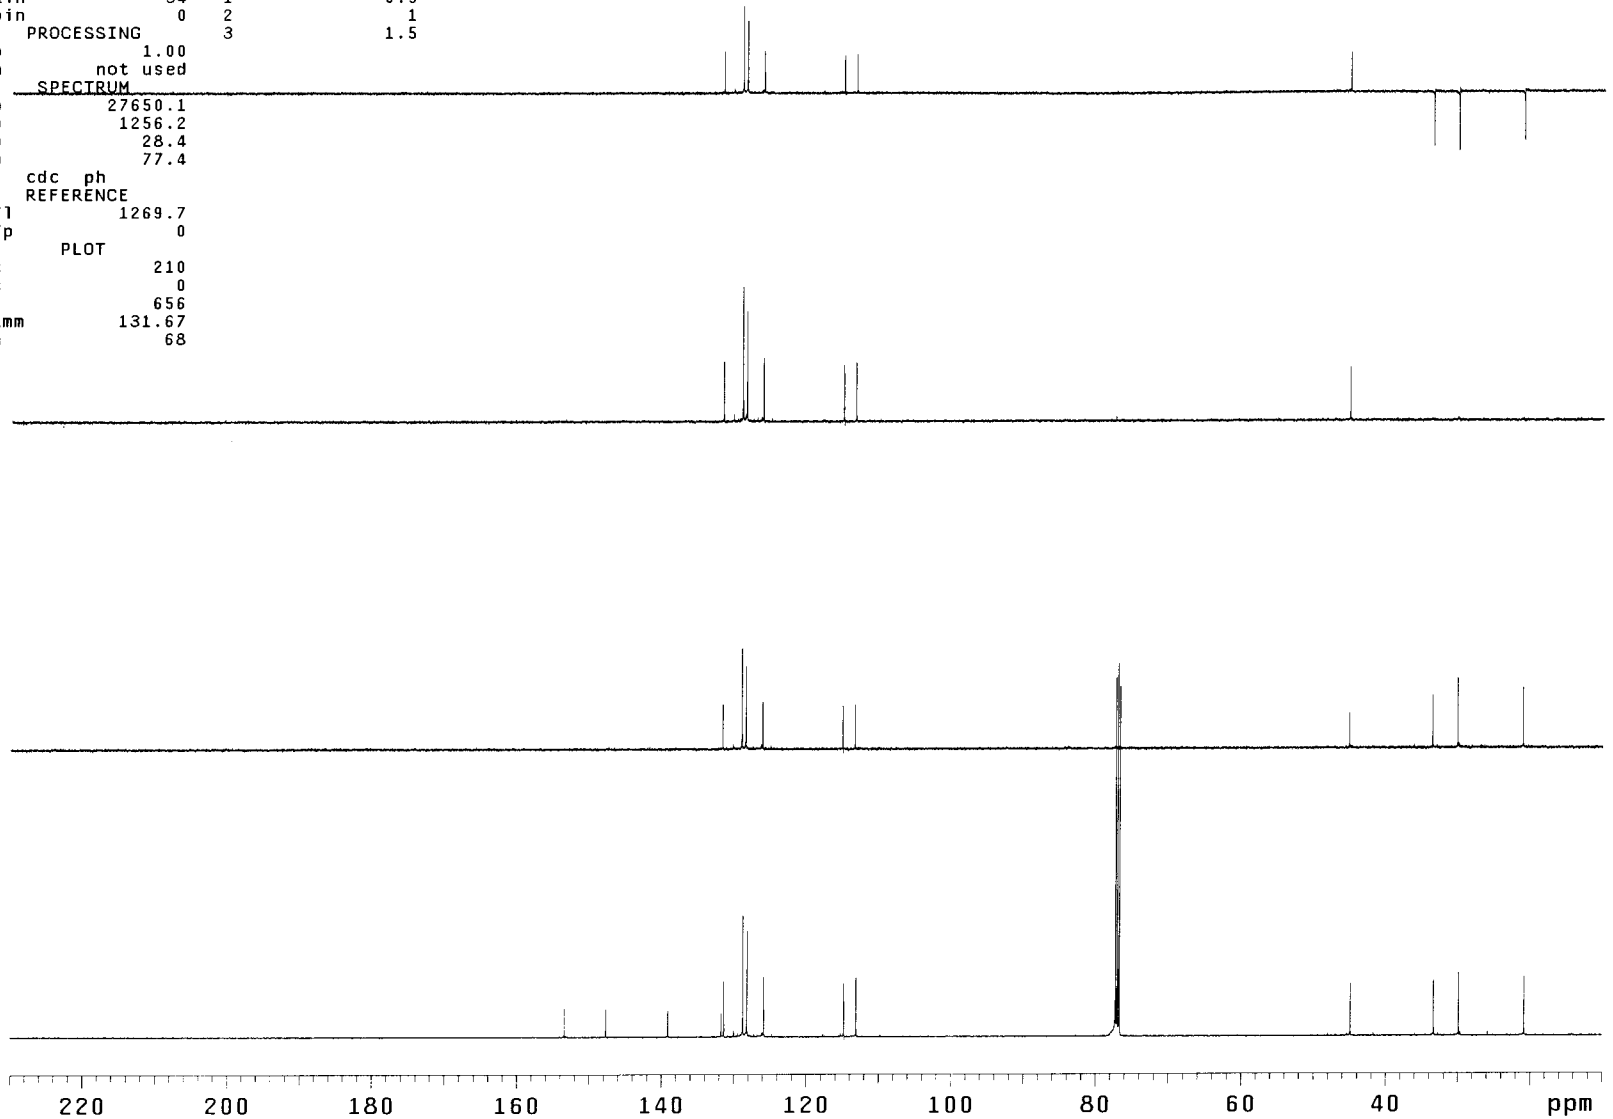

Fig S86. COSY of compound 7 (CDCl3).

S86

RYN-2-153

exp5 gCOSY

| SAMPLE         |             | FLAGS         |          |
|----------------|-------------|---------------|----------|
| date           | Dec 31 2008 | hs            | nn       |
| solvent        | cdc13       | sspul         | n        |
| sample         | undefined   | hsglv1        | 1026     |
| ACQUISITION    |             | SPECIAL       |          |
| sw             | 3998.6      | temp          | not used |
| at             | 0.128       | gain          | 34       |
| np             | 1024        | spin          | 0        |
| fb             | 2000        | F2 PROCESSING |          |
| ss             | 16          | sb            | -0.064   |
| d1             | 1.000       | sbs           | not used |
| nt             | 32          | fn            | 1024     |
| 2D ACQUISITION |             | F1 PROCESSING |          |
| sw1            | 3998.6      | sb1           | -0.032   |
| ni             | 128         | sbs1          | not used |
| TRANSMITTER    |             | proc1         |          |
| tn             | H1          | fn1           | 1024     |
| sfrq           | 499.835     | DISPLAY       |          |
| tof            | -499.9      | sp            | -5.6     |
| tpwr           | 57          | wp            | 3990.8   |
| pw             | 13.000      | sp1           | 7.9      |
| GRADIENTS      |             | wp1           | 3990.8   |
| gzlv11         | 1026        | rfl           | 2348.7   |
| gt1            | 0.001000    | rfp           | 2335.2   |
| gstab          | 0.000500    | rfl1          | -0.1     |
| DECOUPLER      |             | rfl1          | 0        |
| dn             | C13         | PLOT          |          |
| dm             | nnn         | wc            | 155.0    |
|                |             | sc            | 10.0     |
|                |             | wc2           | 155.0    |
|                |             | sc2           | 0        |
|                |             | vs            | 57       |
|                |             | th            | 8        |
|                |             | ai            | cdc av   |

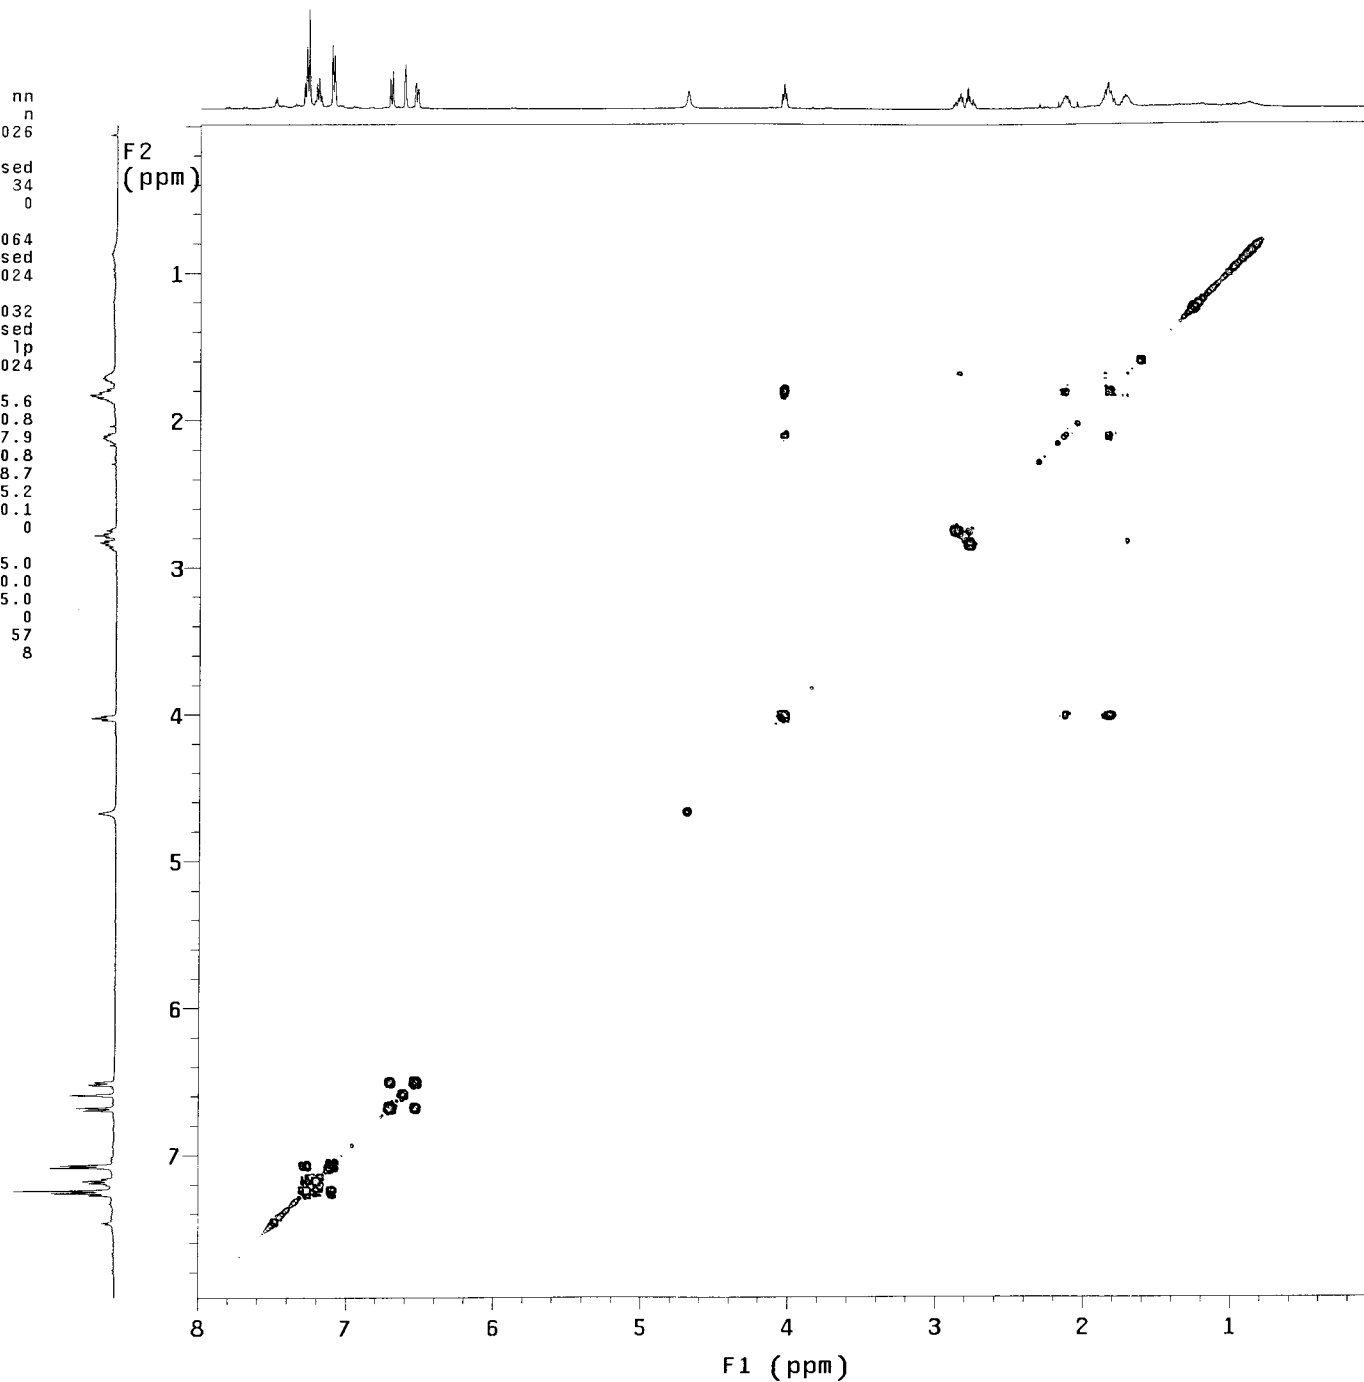

Fig S87. HMQC of compound 7 (CDCl<sub>3</sub>).

RYN-2-153

exp6 gHMQC

| SAMPLE         |             | FLAGS         | ACQUISITION | ARRAYS   |
|----------------|-------------|---------------|-------------|----------|
| date           | Dec 31 2008 | hs            | n           | phase    |
| solvent        | cdcl3       | sspul         | y           | arraydim |
| sample         | undefined   | PFGflg        | y           | 256      |
| ACQUISITION    |             | hsglv1        | 1026        | phase    |
| sw             | 3998.6      | SPECIAL       | 1           | 1        |
| at             | 0.128       | temp          | not used    | 2        |
| np             | 1024        | gain          | 34          |          |
| fb             | 2000        | spin          | 0           |          |
| ss             | 32          | GRADIENTS     |             |          |
| d1             | 1.000       | gzlv11        | 1026        |          |
| nt             | 16          | gt1           | 0.001000    |          |
| 2D ACQUISITION |             | gzlv13        | 516         |          |
| sw1            | 21367.5     | gt3           | 0.001000    |          |
| ni             | 128         | gstab         | 0.000500    |          |
| phase          | arrayed     | F2 PROCESSING |             |          |
| TRANSMITTER    |             | gf            | 0.059       |          |
| tn             | H1          | gfs           | not used    |          |
| sfrq           | 499.835     | fn            | 1024        |          |
| tof            | -499.9      | F1 PROCESSING |             |          |
| tpwr           | 57          | gf1           | 0.006       |          |
| pw             | 13.000      | gfs1          | not used    |          |
| DECOUPLER      |             | procl         | lp          |          |
| dn             | C13         | fn1           | 2048        |          |
| dof            | -2515.1     | DISPLAY       |             |          |
| dm             | nny         | sp            | 676.4       |          |
| dmm            | ccp         | wp            | 3264.5      |          |
| dmf            | 32258       | sp1           | 1766.3      |          |
| dpwr           | 35          | wp1           | 15691.8     |          |
| pxlv1          | 51          | rfl           | 2020.7      |          |
| pxw            | 14.700      | rfp           | 2009.8      |          |
| HMQC           |             | rfl1          | 6943.3      |          |
| j1xh           | 140.0       | rfp1          | 5642.2      |          |
| nullflg        | y           | PLOT          |             |          |
|                |             | wc            | 150.0       |          |
|                |             | sc            | 6.2         |          |
|                |             | wc2           | 116.2       |          |
|                |             | sc2           | 0           |          |
|                |             | vs            | 57          |          |
|                |             | th            | 6           |          |
|                |             | ai            | cdc         | ph       |

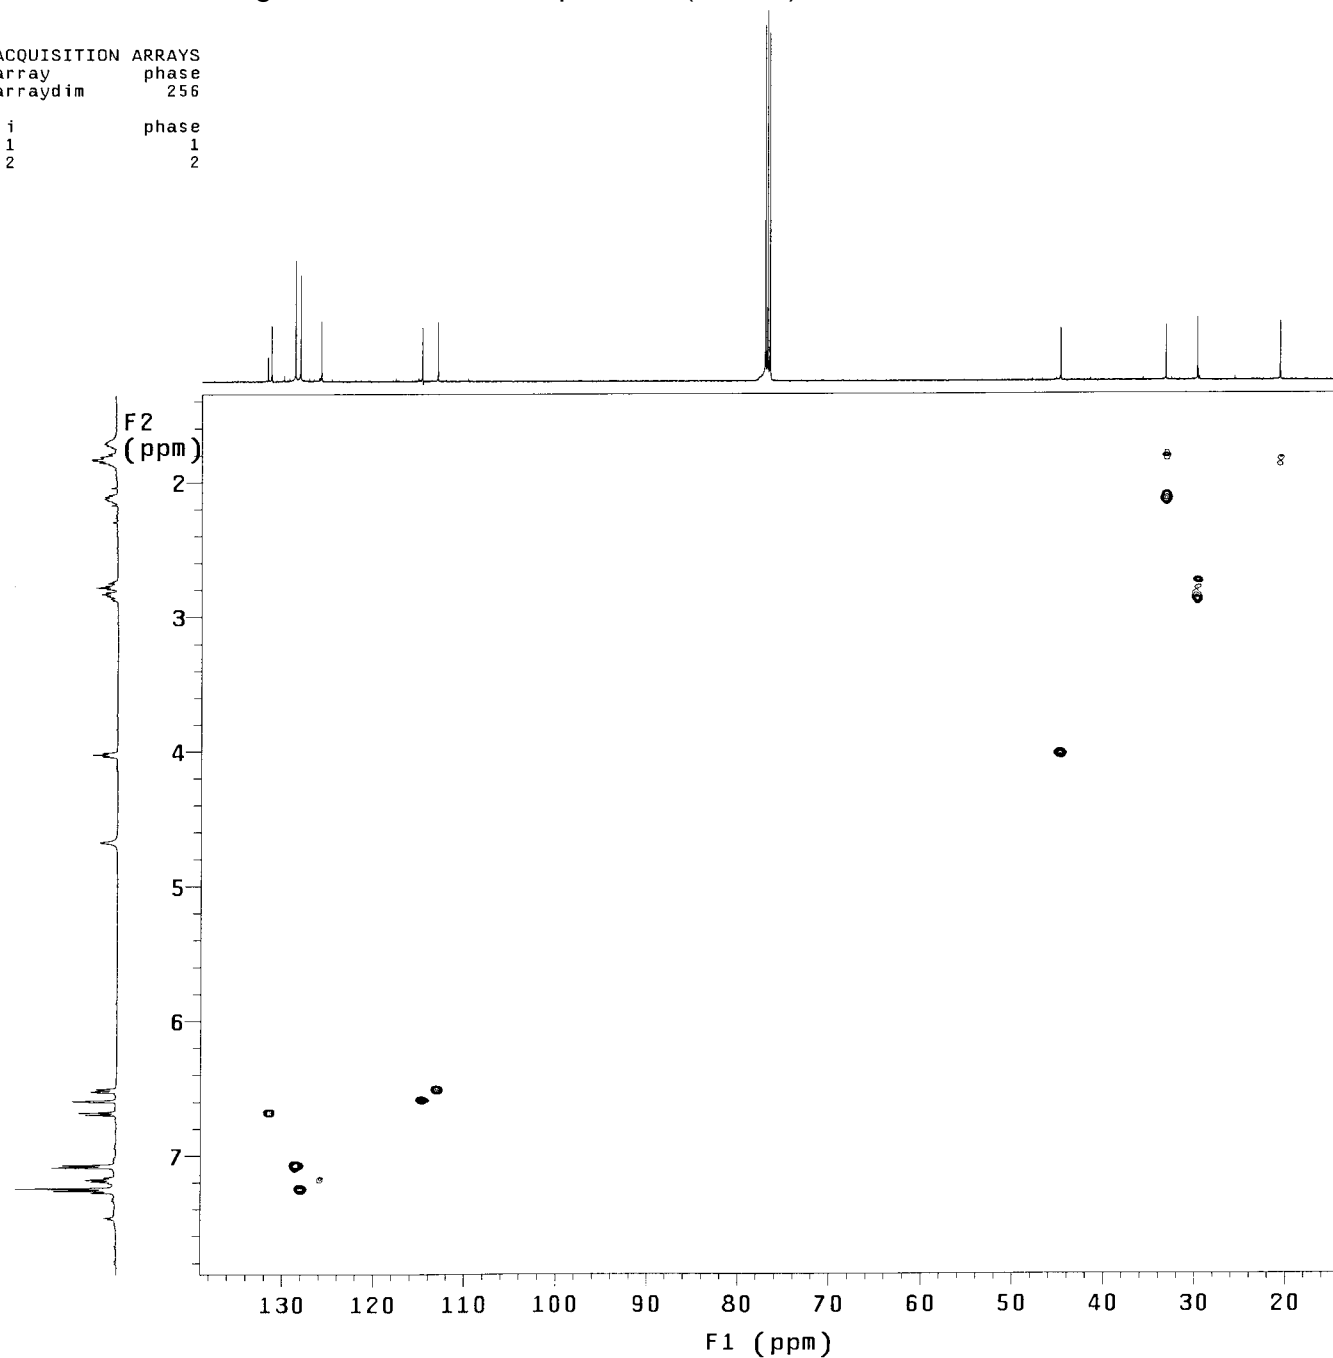

Fig S88. NOESY of compound 7 (CDCl3).

RYN-2-153

exp16 NOESY

| SAMPLE         |             | FLAGS         |          |
|----------------|-------------|---------------|----------|
| date           | Dec 31 2008 | hs            | n        |
| solvent        | cdcl3       | sspul         | y        |
| sample         | undefined   | PFGflg        | y        |
| ACQUISITION    |             | hsglvl        | 1026     |
| sw             | 3998.6      | SPECIAL       |          |
| at             | 0.128       | temp          | not used |
| np             | 1024        | gain          | 34       |
| fb             | 2000        | spin          | 0        |
| ss             | 32          | F2 PROCESSING |          |
| dl             | 1.000       | gf            | 0.059    |
| nt             | 8           | gfs           | not used |
| 2D ACQUISITION |             | fn            | 1024     |
| sw1            | 3998.6      | F1 PROCESSING |          |
| ni             | 200         | gf1           | 0.046    |
| TRANSMITTER    |             | gfs1          | not used |
| tn             | H1          | proc1         | lp       |
| sfrq           | 499.835     | fn1           | 1024     |
| tof            | -499.9      | DISPLAY       |          |
| tpwr           | 57          | sp            | -10.1    |
| pw             | 13.000      | wp            | 3990.8   |
| NOESY          |             | sp1           | 7.9      |
| mix            | 0.400       | wp1           | 3990.8   |
| PRESATURATION  |             | rfl           | 2353.2   |
| satmode        | nnnn        | rfp           | 2335.2   |
| satpwr         | 0           | rfl1          | -0.1     |
| satdly         | 0           | rfp1          | 0        |
| satfrq         | 0           | PLOT          |          |
| DECOUPLER      |             | wc            | 155.0    |
| dn             | C13         | sc            | 10.0     |
| dm             | nnn         | wc2           | 155.0    |
|                |             | sc2           | 0        |
|                |             | vs            | 57       |
|                |             | th            | 3        |
|                |             | ai            | ph       |

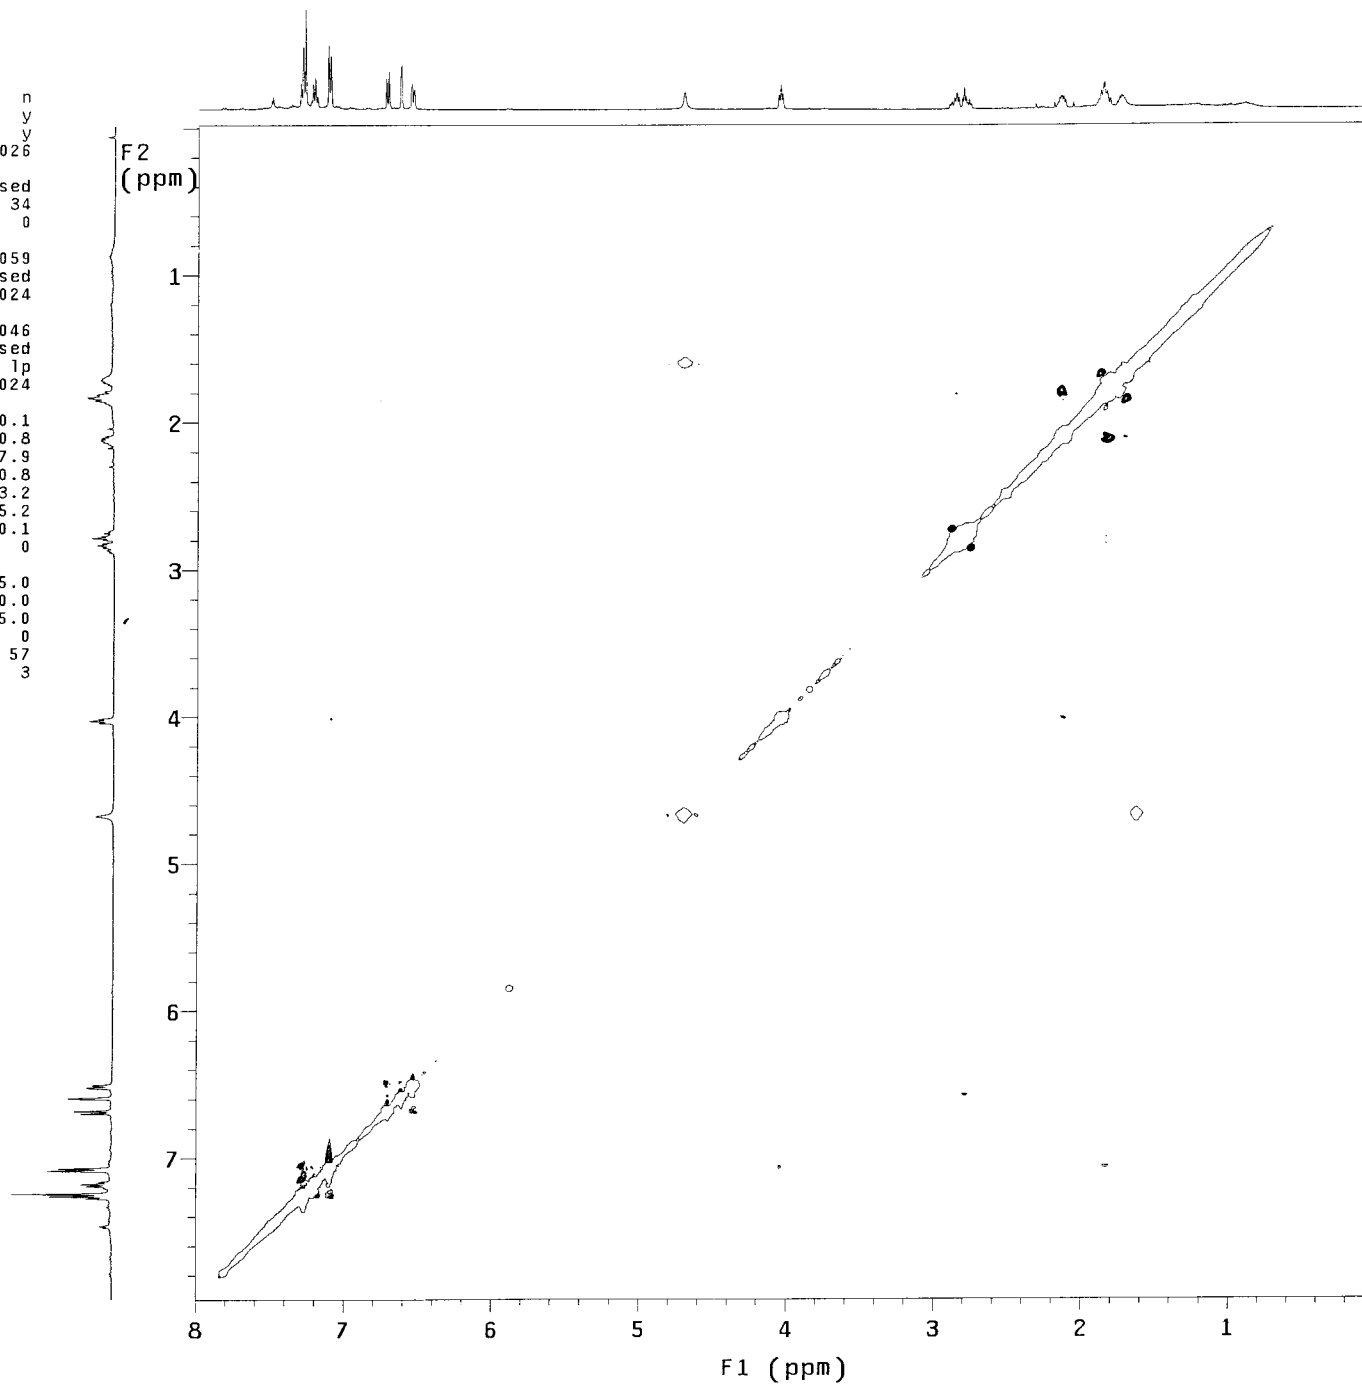



Fig S89. 1H NMR of compound 8 (CDCl3).

RYN-2-166

exp2 s2pu1

```

SAMPLE
date Feb 26 2009 dfrq 125.699
solvent cdc13 dn C13
file exp dpwr 30
ACQUISITION
sfrq 499.836 dm nnn
tn H1 dmm 200
at 3.000 dmf
np 48000 dseq
sw 8000.0 dres 1.0
fb not used homo n
bs 4
tpwr 57 wtfile
pw 4.8 proc ft
d1 1.000 fn not used
tof 499.7 math f
nt 4
ct 4 werr react
alock y wexp procplot
gain not used wbs
FLAGS wnt wft

PROCESSING

DISPLAY
sp -250.1
wp 5498.0
vs 19
sc 0
wc 210
hzmm 26.18
is 193.87
rf1 4630.6
rfp 3618.8
th 3
ins 100.000
nm cdc ph
    
```

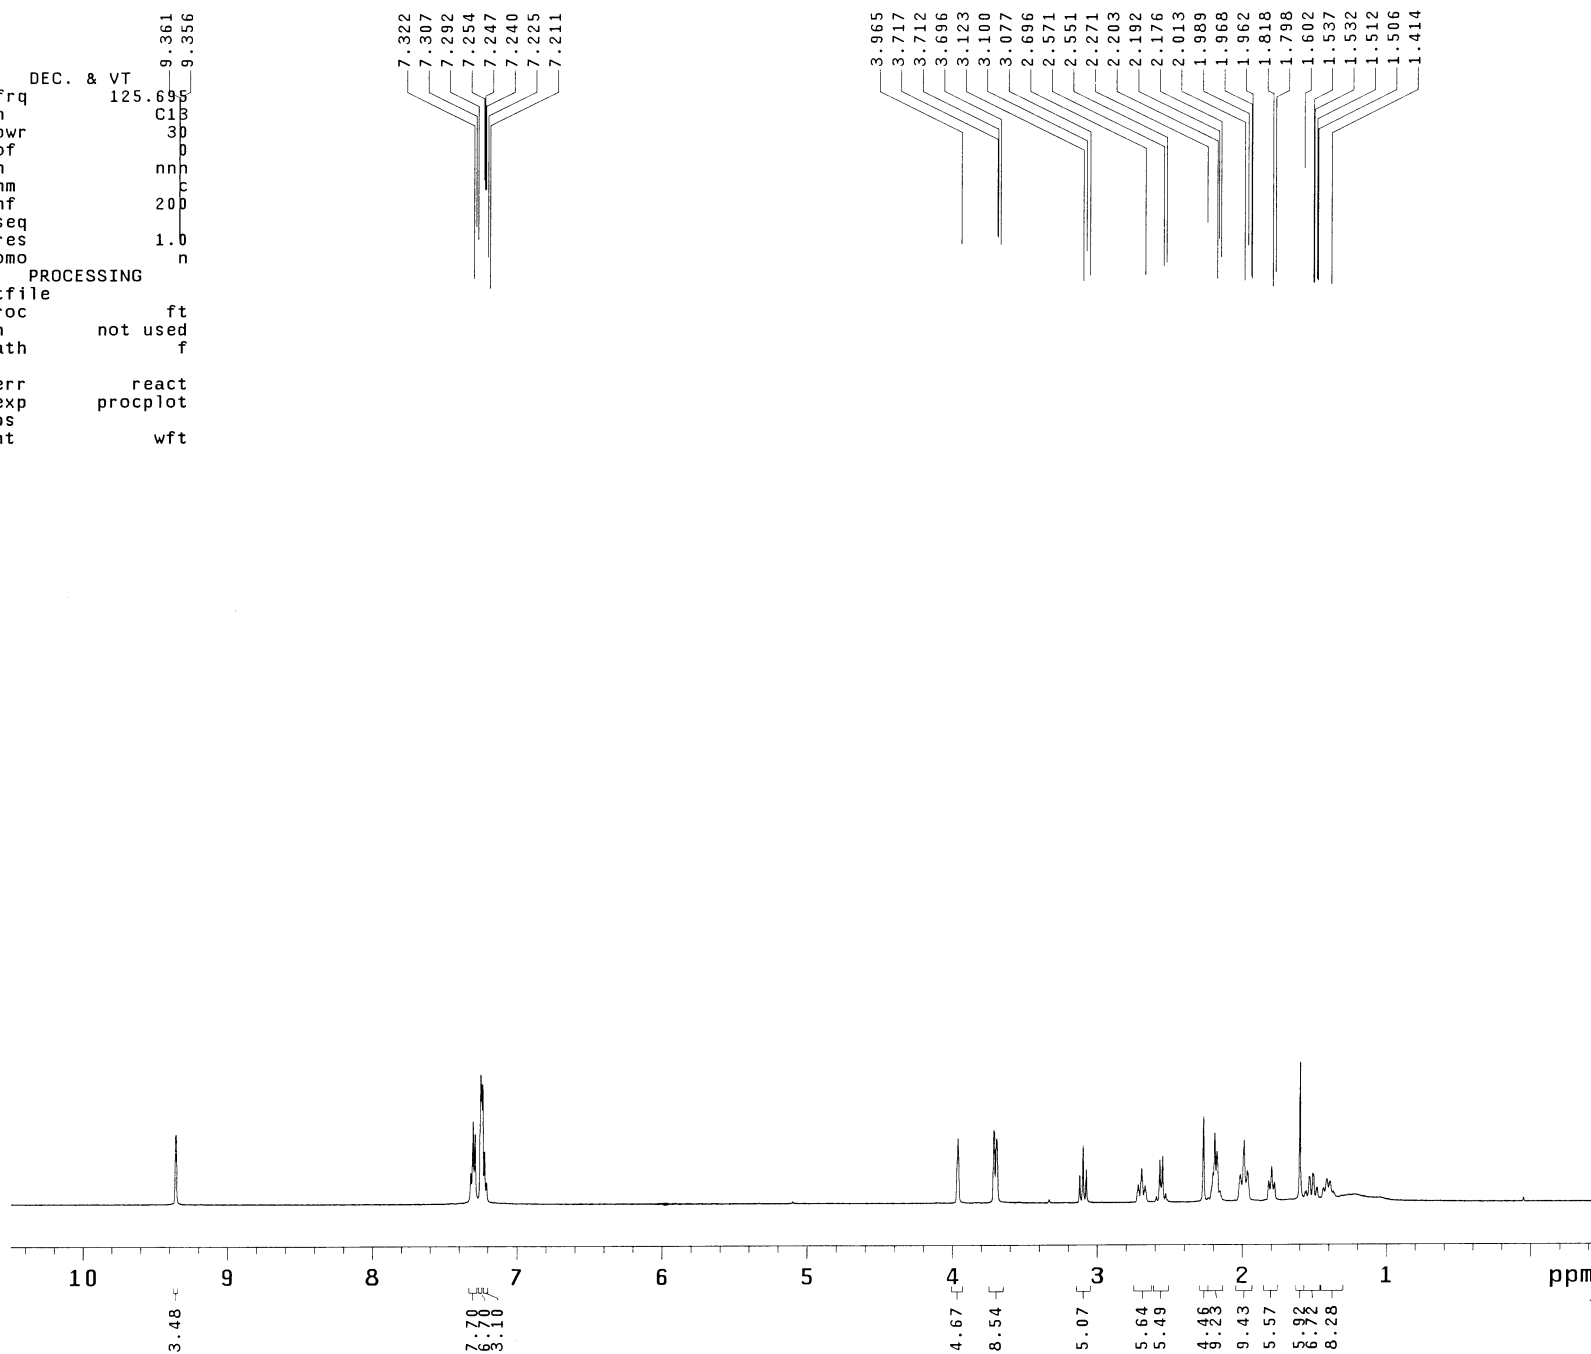

RYN-2-166

exp4 s2pul

```
SAMPLE      DEC. & VT
date Feb 26 2009 dfrq      499.836
solvent cdc13 dn          H1
file exp dpwr          37
ACQUISITION dof          0
sfrq 125.698 dm          yyy
tn C13 dmm            w
at 1.000 dmf          10870
np 62894 dseq
sw 31446.5 dres        1.0
fb not used homo      n
bs 16 PROCESSING
ss 2 lb 1.00
tpwr 53 wtfile
pw 4.0 proc          ft
d1 1.000 fn          not used
tof 2512.2 math      f
nt 10000
ct 8544 werr          react
alock y wexp          procplot
gain not used wbs      testsn
FLAGS wnt

il n
in n
dp y
hs nn

DISPLAY
sp -1256.9
wp 28906.3
vs 142
sc 0
wc 210
hzmm 137.65
is 500.00
rfl 10982.5
rfp 9677.6
th 5
ins 100.000
nm ph
```

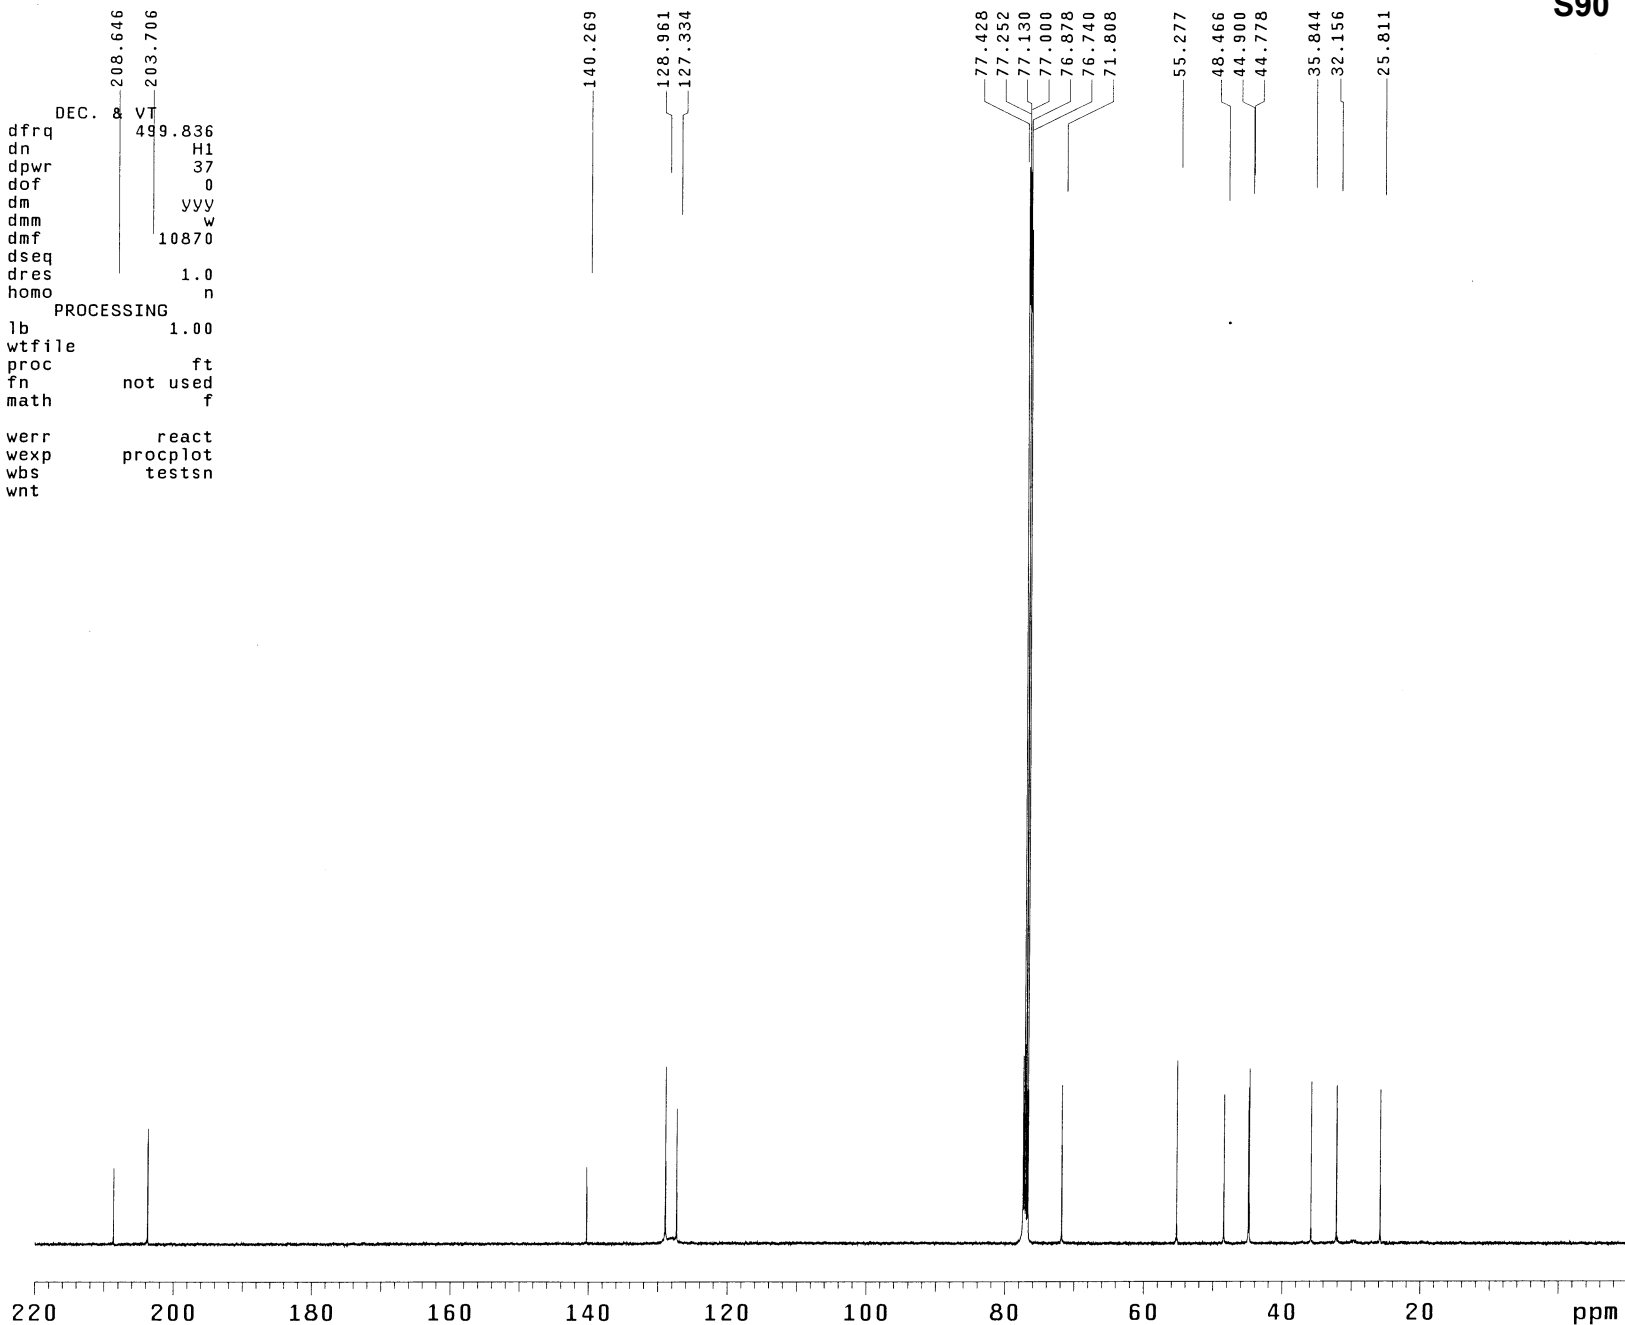Fig S90. <sup>13</sup>C NMR of compound 8 (CDCl<sub>3</sub>).

Fig S91. DEPT of compound 8 (CDCl3).

S91

RYN-2-166

exp3 DEPT

|             |             |            |             |        |
|-------------|-------------|------------|-------------|--------|
| SAMPLE      |             | DEPT       | ACQUISITION | ARRAYS |
| date        | Feb 26 2009 | j1xh       | 140.0       | array  |
| solvent     | cdc13       | mult       | arrayed     | mult   |
| sample      | undefined   | SPECIAL    | arraydim    | 3      |
| ACQUISITION |             | temp       | not used    | i      |
| sw          | 31446.5     | gain       | 20          | 1      |
| at          | 1.000       | spin       | 0           | 2      |
| np          | 62894       | PROCESSING | 3           | 1.5    |
| bs          | 16          | lb         | 1.00        |        |
| ss          | -4          | fn         | not used    |        |
| d1          | 1.000       | SPECTRUM   |             |        |
| nt          | 1500        | wp         | 28906.3     |        |
| ct          | 1500        | sp         | -1257.2     |        |
| TRANSMITTER |             | rp         | -58.0       |        |
| tn          | C13         | lp         | 148.7       |        |
| tof         | 2512.2      | ai         | cdc ph      |        |
| tpwr        | 53          | REFERENCE  |             |        |
| pw          | 8.600       | rfl        | 1269.7      |        |
| DECOUPLER   |             | rpf        | 0           |        |
| dn          | H1          | PLOT       |             |        |
| dof         | 0           | wc         | 210         |        |
| dpwr        | 37          | sc         | 0           |        |
| dm          | nny         | vs         | 216         |        |
| dmm         | ccw         | hzmm       | 137.65      |        |
| dmf         | 10870       | th         | 68          |        |
| pp1v1       | 51          |            |             |        |
| pp          | 21.300      |            |             |        |

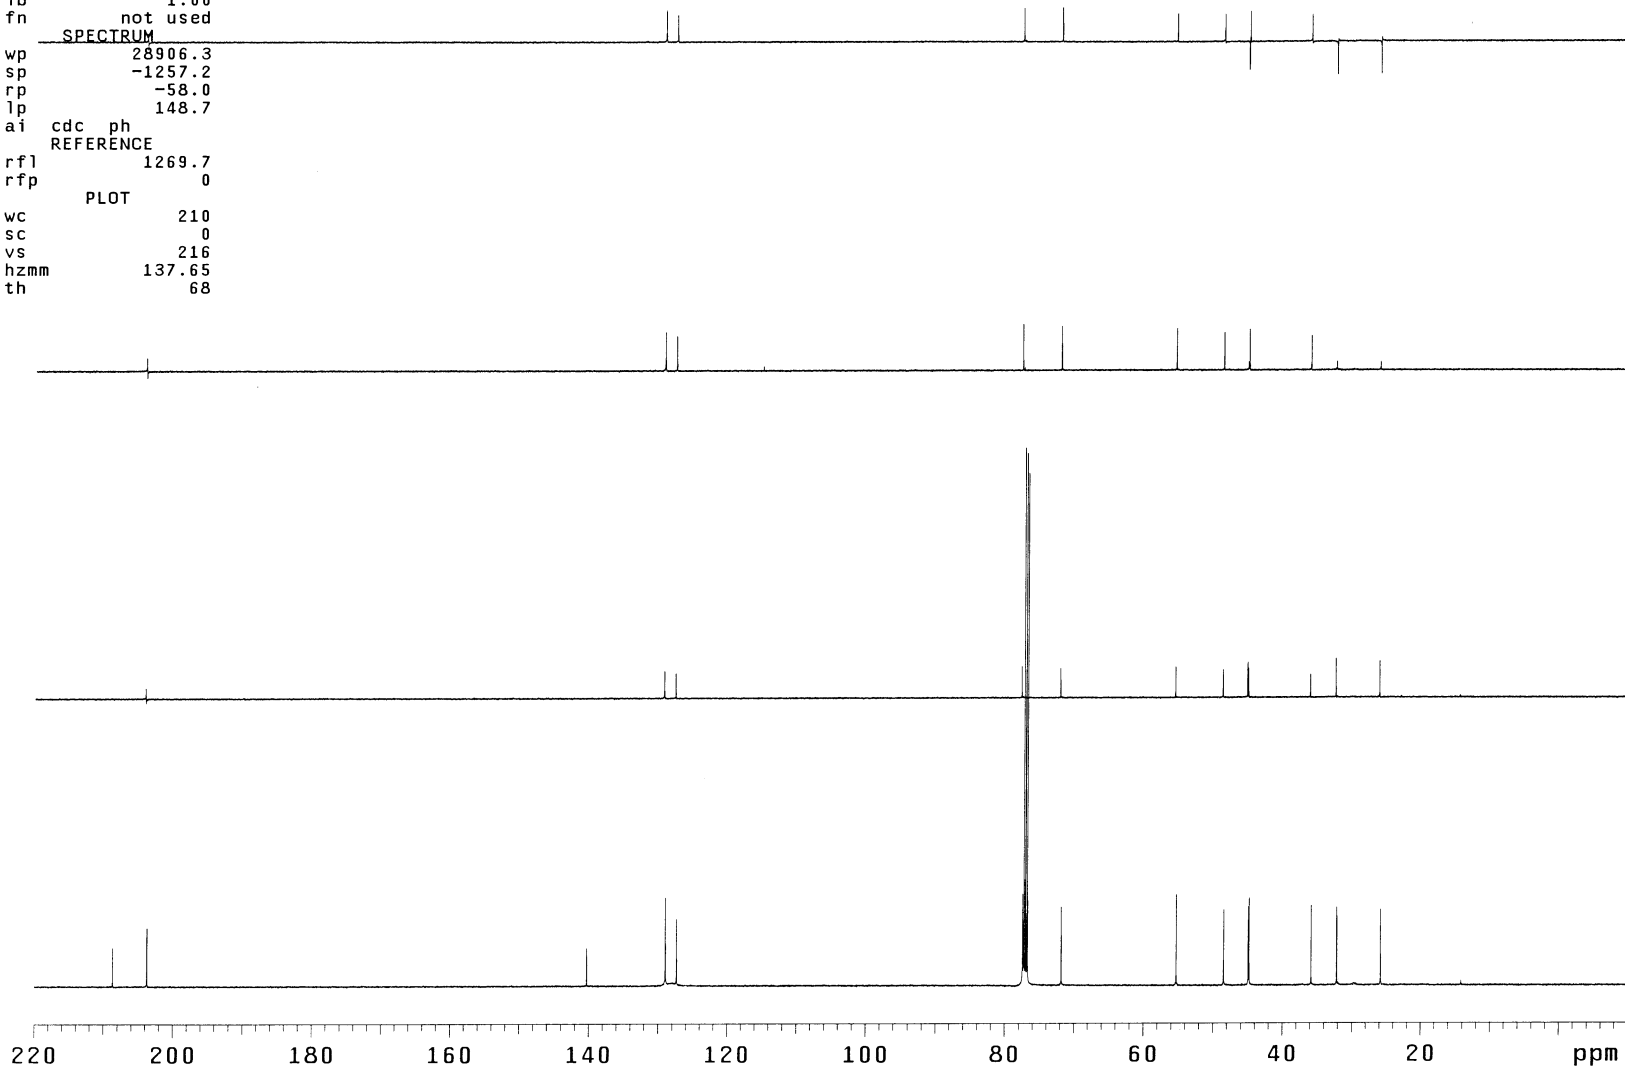

Fig S92. DEPT of compound 8 (CDCl3), Expanded.

RYN-2-166

exp13 DEPT

|             |             |            |                    |          |
|-------------|-------------|------------|--------------------|----------|
| SAMPLE      |             | DEPT       | ACQUISITION ARRAYS |          |
| date        | Feb 26 2009 | j1xh       | 140.0              | array    |
| solvent     | cdcl3       | mult       | arrayed            | mult     |
| sample      | undefined   | SPECIAL    |                    | arraydim |
| ACQUISITION |             | temp       | not used           | i        |
| sw          | 31446.5     | gain       | 20                 | 1        |
| at          | 1.000       | spin       | 0                  | 2        |
| np          | 62894       | PROCESSING | 3                  | 3        |
| bs          | 16          | lb         | 1.00               | mult     |
| ss          | -4          | fn         | not used           | 0.5      |
| d1          | 1.000       | SPECTRUM   |                    | 1        |
| nt          | 1500        | wp         | 1256.2             | 2        |
| ct          | 1500        | sp         | 5027.1             | 3        |
| TRANSMITTER |             | rp         | -39.6              | 1.5      |
| tn          | C13         | lp         | 52.2               |          |
| tof         | 2512.2      | ai         | cdc ph             |          |
| tpwr        | 53          | REFERENCE  |                    |          |
| pw          | 8.600       | rfl        | 8252.2             |          |
| DECOUPLER   |             | rfp        | 6947.4             |          |
| dn          | H1          | PLOT       |                    |          |
| dof         | 0           | wc         | 210                |          |
| dpwr        | 37          | sc         | 0                  |          |
| dm          | nny         | vs         | 694                |          |
| dmm         | ccw         | hzmm       | 5.98               |          |
| dmf         | 10870       | th         | 68                 |          |
| pplvl       | 51          |            |                    |          |
| pp          | 21.300      |            |                    |          |

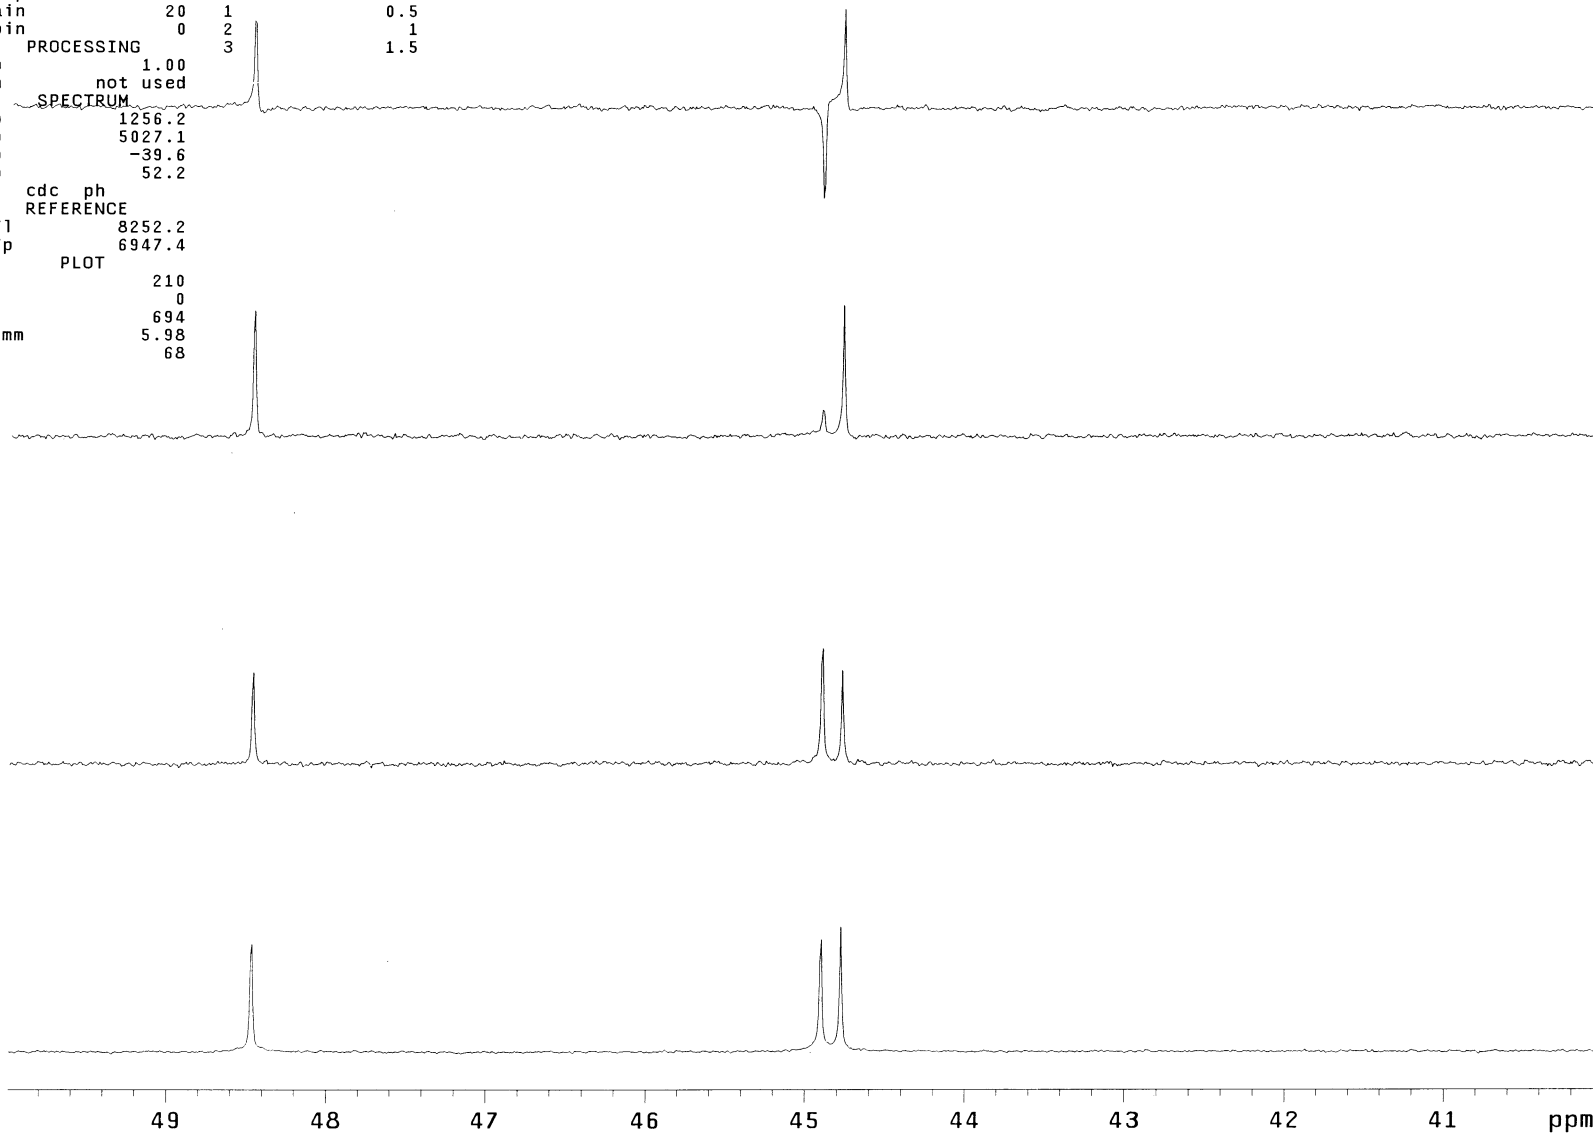

Fig S93. HMQC of compound 8 (CDCl<sub>3</sub>).

RYN-2-166

exp14 gHMQC

| SAMPLE  |             | FLAGS         | ACQUISITION | ARRAYS   |
|---------|-------------|---------------|-------------|----------|
| date    | Feb 26 2009 | hs            | n           | array    |
| solvent | cdcl3       | sspul         | y           | arraydim |
| sample  | undefined   | PFGflg        | y           | phase    |
|         |             | hsglv1        | 1006        | phase    |
| sw      | 4490.3      | SPECIAL       | 1           | 1        |
| at      | 0.228       | temp          | not used    | 2        |
| np      | 2048        | gain          | 50          |          |
| fb      | not used    | spin          | 0           |          |
| ss      | 32          | GRADIENTS     |             |          |
| d1      | 1.000       | gzlv11        | 1006        |          |
| nt      | 16          | gt1           | 0.001000    |          |
|         |             | gzlv13        | 506         |          |
| sw1     | 21367.5     | gt3           | 0.001000    |          |
| ni      | 128         | gstab         | 0.000500    |          |
| phase   | arrayed     | F2 PROCESSING |             |          |
|         |             | gf            | 0.105       |          |
| tn      | H1          | gfs           | not used    |          |
| sfrq    | 499.836     | fn            | 2048        |          |
| tof     | 249.8       | F1 PROCESSING |             |          |
| tpwr    | 57          | gf1           | 0.006       |          |
| pw      | 9.600       | gfs1          | not used    |          |
|         |             | procl         | lp          |          |
| dn      | C13         | fn1           | 2048        |          |
| dof     | -2515.1     | DISPLAY       |             |          |
| dm      | nny         | sp            | 645.0       |          |
| dmm     | ccp         | wp            | 3205.5      |          |
| dmf     | 32258       | sp1           | 2829.6      |          |
| dpwr    | 33          | wp1           | 14022.4     |          |
| pwxlvl  | 49          | rfl           | 1499.1      |          |
| pw      | 14.000      | rfl1          | 1981.8      |          |
|         |             | rfl1          | 11012.5     |          |
| j1xh    | HMQC        | rfl1          | 9731.4      |          |
| nullflg | y           | PLOT          |             |          |
|         |             | wc            | 150.0       |          |
|         |             | sc            | 6.2         |          |
|         |             | wc2           | 116.2       |          |
|         |             | sc2           | 0           |          |
|         |             | vs            | 31          |          |
|         |             | th            | 6           |          |
|         |             | ai            | cdc ph      |          |

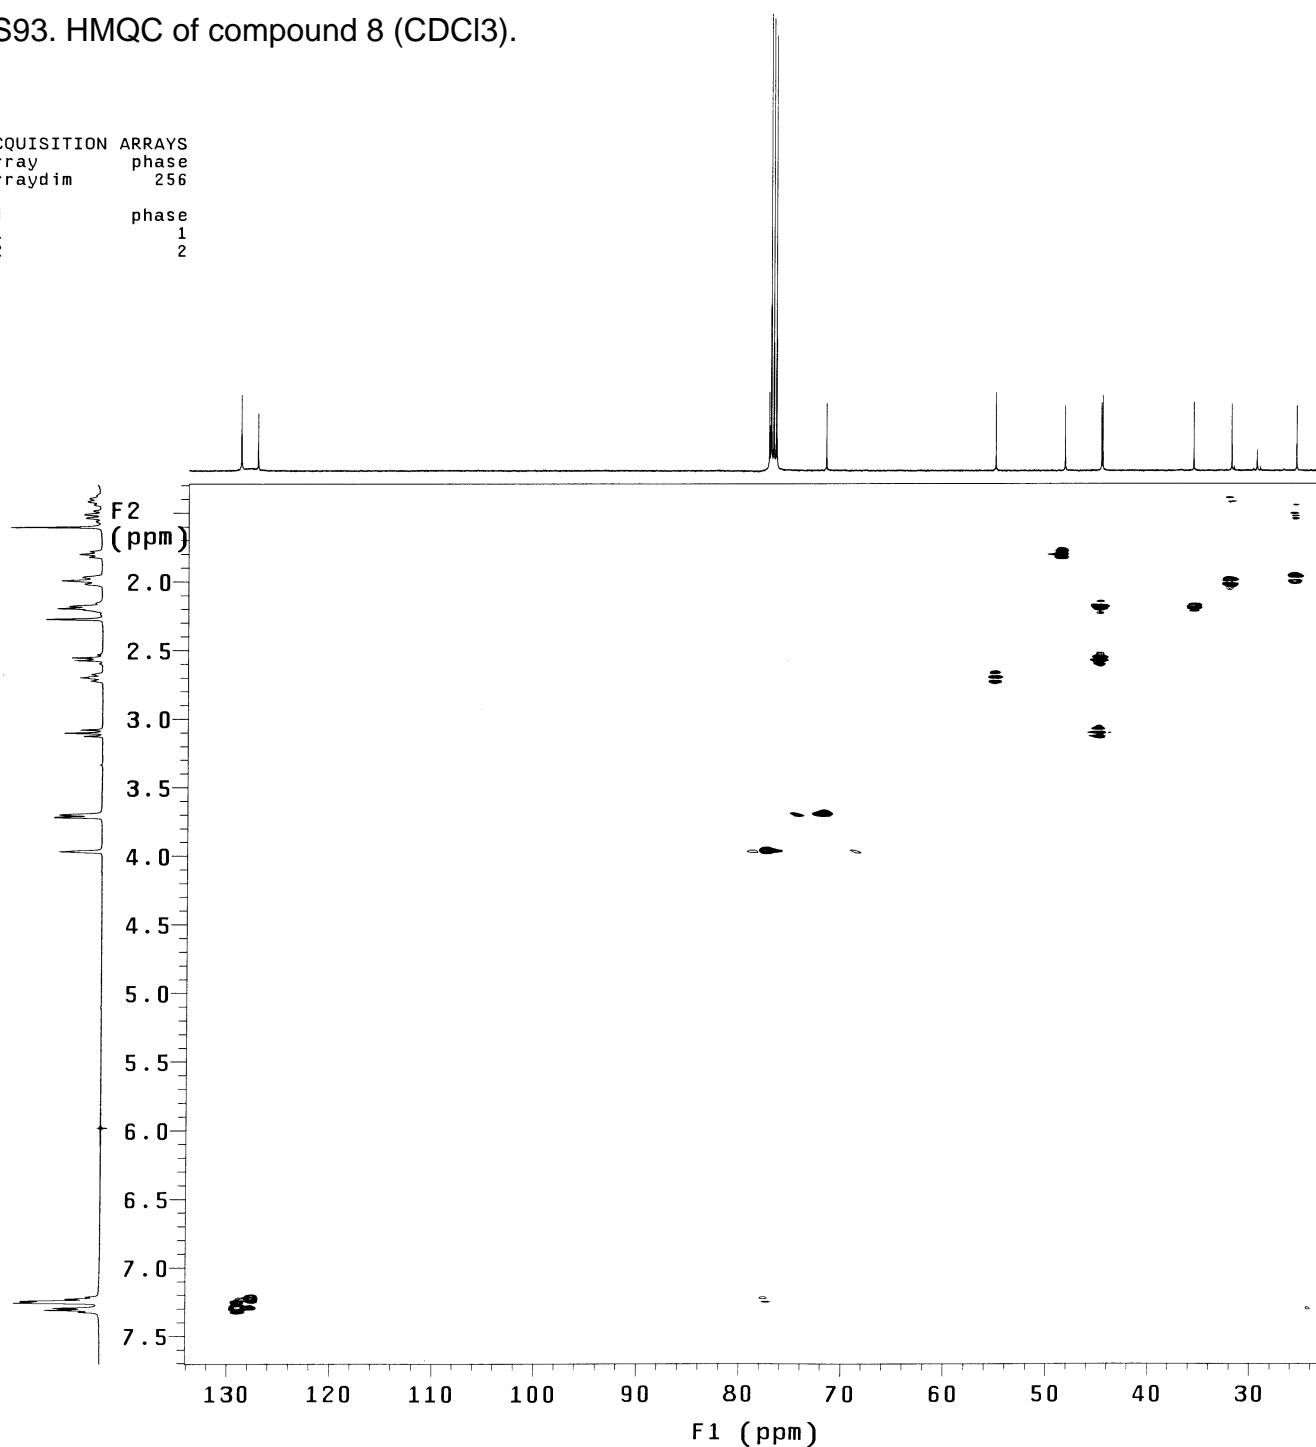

Fig S94. HMQC of compound 8 (CDCl<sub>3</sub>), expanded.

RYN-2-166

exp14 gHMQC

| SAMPLE         |             | FLAGS         | ACQUISITION | ARRAYS |
|----------------|-------------|---------------|-------------|--------|
| date           | Feb 26 2009 | hs            | n           |        |
| solvent        | cdcl3       | sspul         | y           | phase  |
| sample         | undefined   | PFGflg        | y           | 256    |
| ACQUISITION    |             | hsglv1        | 1006        | i      |
| sw             | 4490.3      | SPECIAL       | 1           | phase  |
| at             | 0.228       | temp          | not used    | 1      |
| np             | 2048        | gain          | 50          | 2      |
| fb             | not used    | spin          | 0           |        |
| ss             | 32          | GRADIENTS     |             |        |
| d1             | 1.000       | gzlv11        | 1006        |        |
| nt             | 16          | gt1           | 0.001000    |        |
| 2D ACQUISITION |             | gzlv13        | 506         |        |
| sw1            | 21367.5     | gt3           | 0.001000    |        |
| ni             | 128         | gstab         | 0.000500    |        |
| phase          | arrayed     | F2 PROCESSING |             |        |
| tn             | TRANSMITTER | gf            | 0.105       |        |
| sfrq           | H1          | gfs           | not used    |        |
| tof            | 499.836     | fn            | 2048        |        |
| tpwr           | 249.8       | F1 PROCESSING |             |        |
| pw             | 9.600       | gf1           | 0.006       |        |
| DECOUPLER      |             | gfs1          | not used    |        |
| dn             | C13         | proc1         | lp          |        |
| dof            | -2515.1     | fn1           | 2048        |        |
| dm             | nny         | DISPLAY       |             |        |
| dmm            | ccp         | sp            | 509.1       |        |
| dmf            | 32258       | wp            | 1784.7      |        |
| dpwr           | 33          | sp1           | 2412.3      |        |
| pwxlvl         | 49          | wp1           | 5049.7      |        |
| pw             | 14.000      | rfl           | 1499.1      |        |
| HMQC           |             | rfp           | 1981.8      |        |
| j1xh           | 140.0       | rfl1          | 11012.5     |        |
| nullflg        | y           | rfl1          | 9731.4      |        |
|                |             | PLOT          |             |        |
|                |             | wc            | 150.0       |        |
|                |             | sc            | 6.2         |        |
|                |             | wc2           | 116.2       |        |
|                |             | sc2           | 0           |        |
|                |             | vs            | 31          |        |
|                |             | th            | 6           |        |
|                |             | ai            | cdc         | ph     |

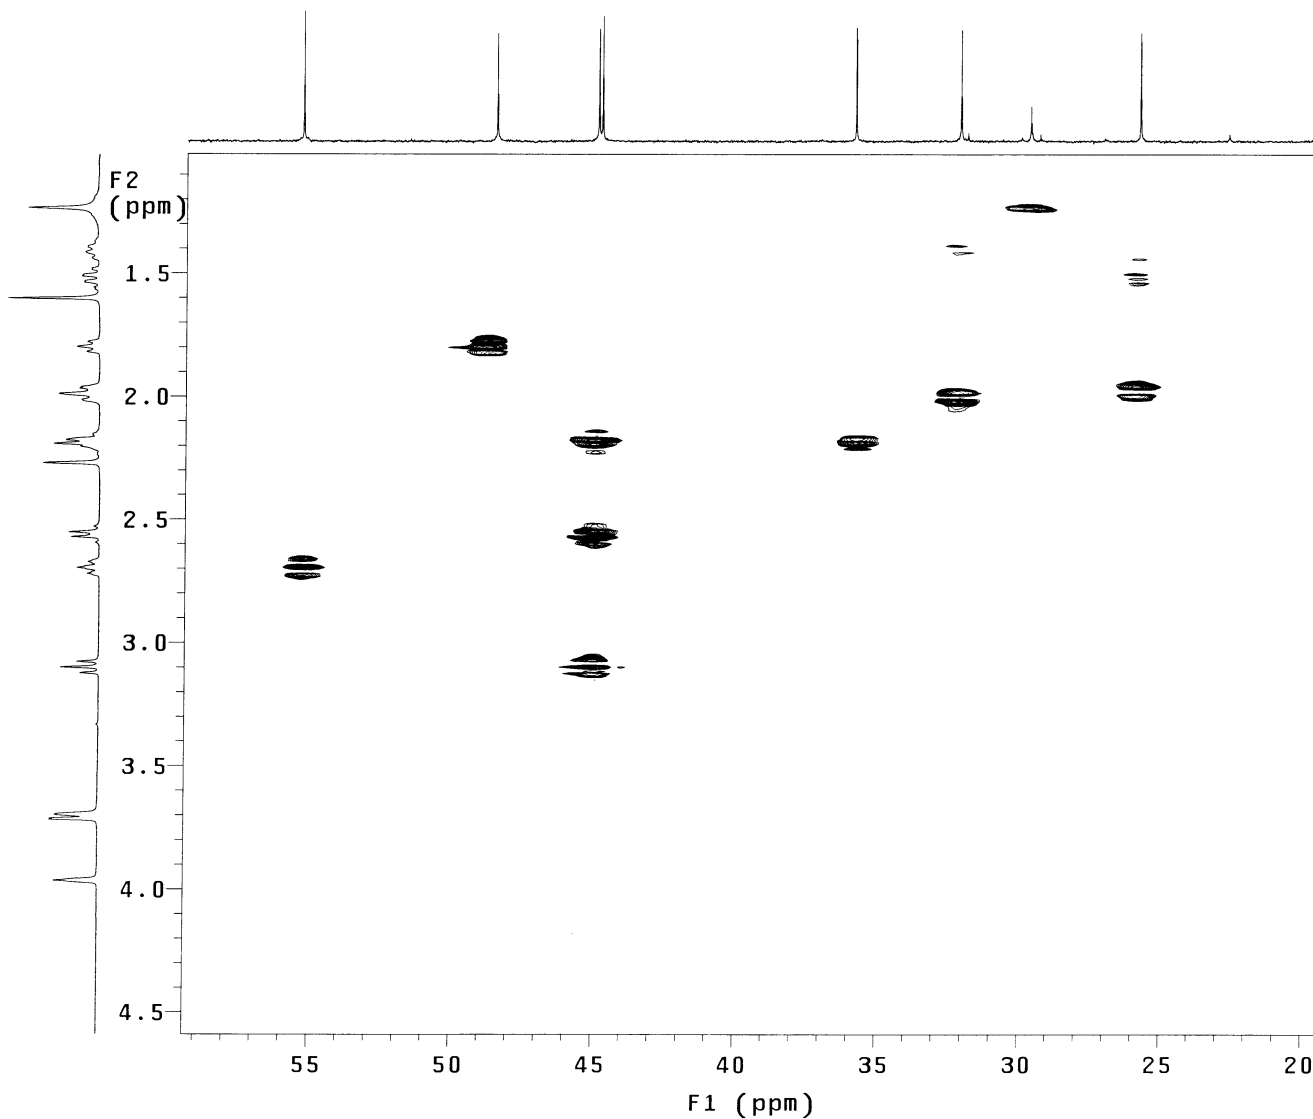

Fig S95. COSY of compound 8 (CDCl3).

S95

RYN-2-166

exp5 gCOSY

| SAMPLE         |             | FLAGS         |            |
|----------------|-------------|---------------|------------|
| date           | Feb 26 2009 | hs            | nn         |
| solvent        | cdc13       | sspul         | n          |
| sample         | undefined   | hsglv1        | 1006       |
| ACQUISITION    |             | SPECIAL       |            |
| sw             | 4490.3      | temp          | not used   |
| at             | 0.228       | gain          | 30         |
| np             | 2048        | spin          | 0          |
| fb             | not used    | F2            | PROCESSING |
| ss             | 16          | sb            | -0.114     |
| d1             | 1.000       | sbs           | not used   |
| nt             | 16          | fn            | 2048       |
| 2D ACQUISITION |             | F1 PROCESSING |            |
| sw1            | 4490.3      | sb1           | -0.029     |
| ni             | 128         | sbs1          | not used   |
| TRANSMITTER    |             | proc1         |            |
| tn             | H1          | fn1           | 2048       |
| sfrq           | 499.836     | DISPLAY       |            |
| tof            | 249.8       | sp            | 490.4      |
| tpwr           | 57          | wp            | 4486.0     |
| pw             | 9.600       | sp1           | 493.5      |
| GRADIENTS      |             | wp1           | 4486.0     |
| gzlv11         | 1006        | rfl           | 1495.8     |
| gt1            | 0.001000    | rfp           | 1981.8     |
| gstab          | 0.000500    | rfl1          | 1492.7     |
| DECOUPLER      |             | rfp1          | 1981.8     |
| dn             | C13         | PLOT          |            |
| dm             | nnn         | wc            | 155.0      |
|                |             | sc            | 10.0       |
|                |             | wc2           | 155.0      |
|                |             | sc2           | 0          |
|                |             | vs            | 31         |
|                |             | th            | 8          |
|                |             | ai            | cdc av     |

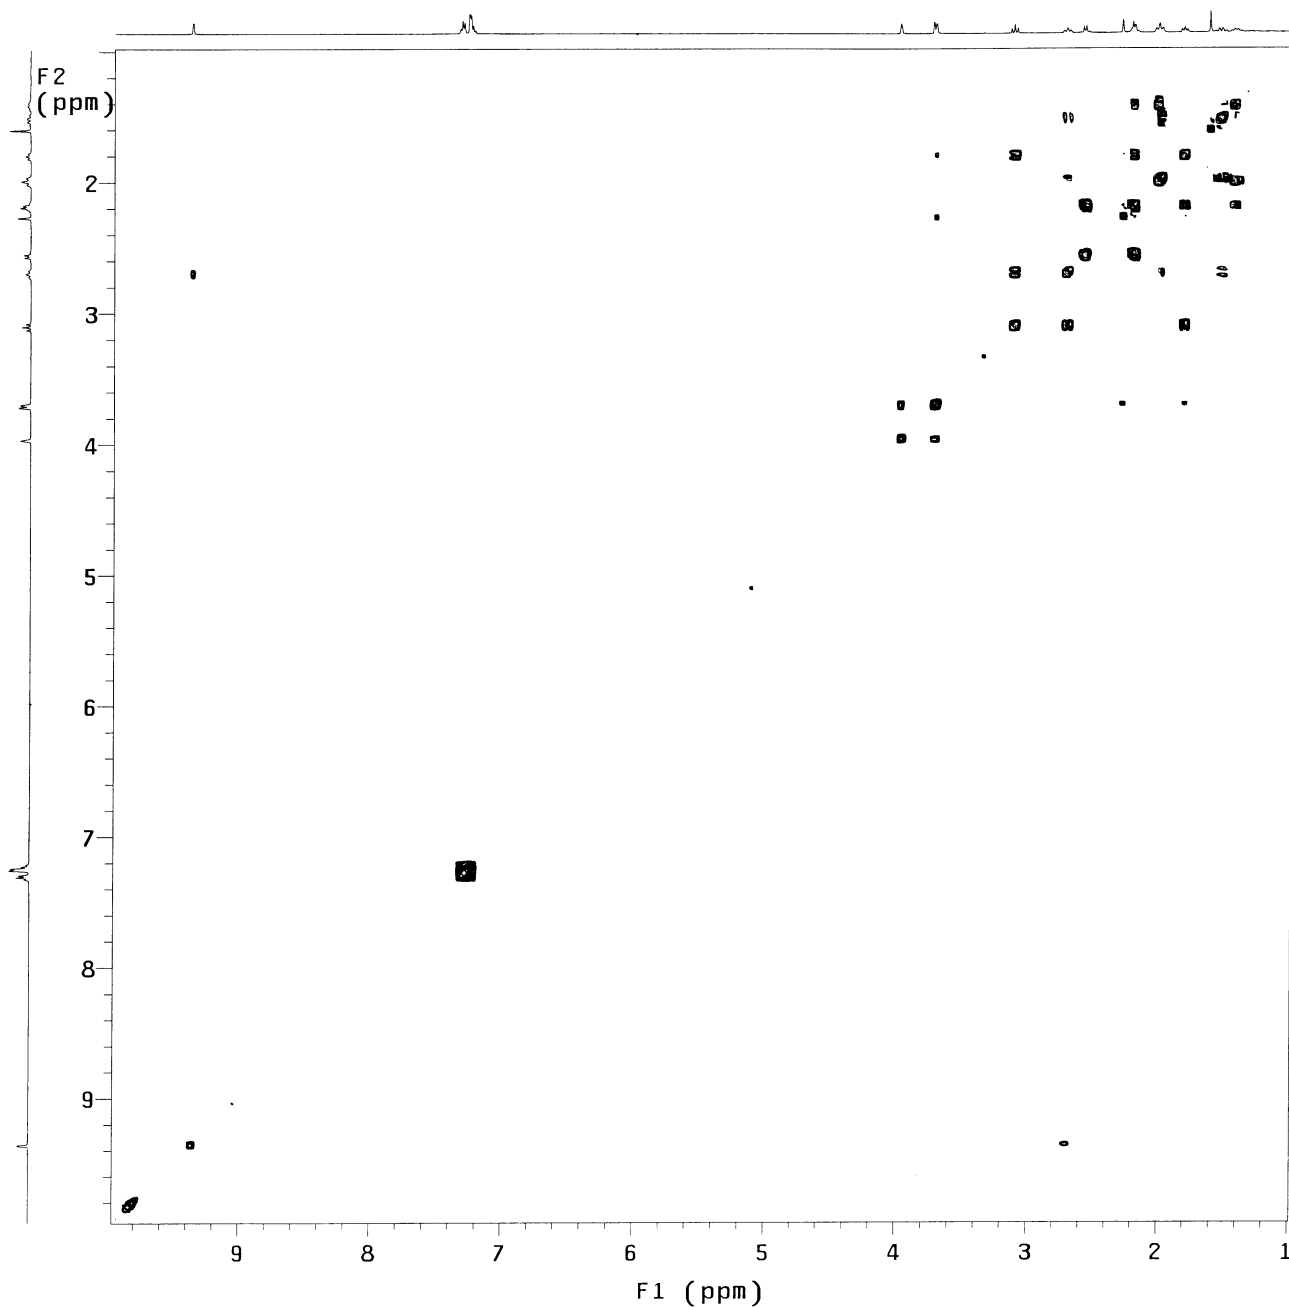

Fig S96. NOESY of compound 8 (CDCl3).

RYN-2-166

exp15 NOESY

| SAMPLE         |             | FLAGS         |          |
|----------------|-------------|---------------|----------|
| date           | Feb 26 2009 | hs            | n        |
| solvent        | cdcl3       | sspul         | y        |
| sample         | undefined   | PFGflg        | y        |
| ACQUISITION    |             | hsglv1        | 1006     |
| sw             | 4490.3      | SPECIAL       |          |
| at             | 0.228       | temp          | not used |
| np             | 2048        | gain          | 30       |
| fb             | not used    | spin          | 0        |
| ss             | 32          | F2 PROCESSING |          |
| d1             | 1.000       | gf            | 0.105    |
| nt             | 8           | gfs           | not used |
| 2D ACQUISITION |             | fn            | 2048     |
| sw1            | 4490.3      | F1 PROCESSING |          |
| ni             | 200         | gf1           | 0.041    |
| TRANSMITTER    |             | gfs1          | not used |
| tn             | H1          | proc1         | lp       |
| sfrq           | 499.836     | fn1           | 2048     |
| tof            | 249.8       | DISPLAY       |          |
| tpwr           | 57          | sp            | 494.8    |
| pw             | 9.600       | wp            | 4486.0   |
| NOESY          |             | sp1           | 492.8    |
| mix            | 0.600       | wp1           | 4486.0   |
| PRESATURATION  |             | rfl           | 1491.4   |
| satmode        | nnnn        | rfp           | 1981.8   |
| satpwr         | 0           | rfl1          | 1493.4   |
| satdly         | 0           | rfp1          | 1981.8   |
| satfrq         | 0           | PLOT          |          |
| DECOUPLER      |             | wc            | 155.0    |
| dn             | C13         | sc            | 10.0     |
| dm             | nnn         | wc2           | 155.0    |
|                |             | sc2           | 0        |
|                |             | vs            | 31       |
|                |             | th            | 3        |
|                |             | ai            | ph       |

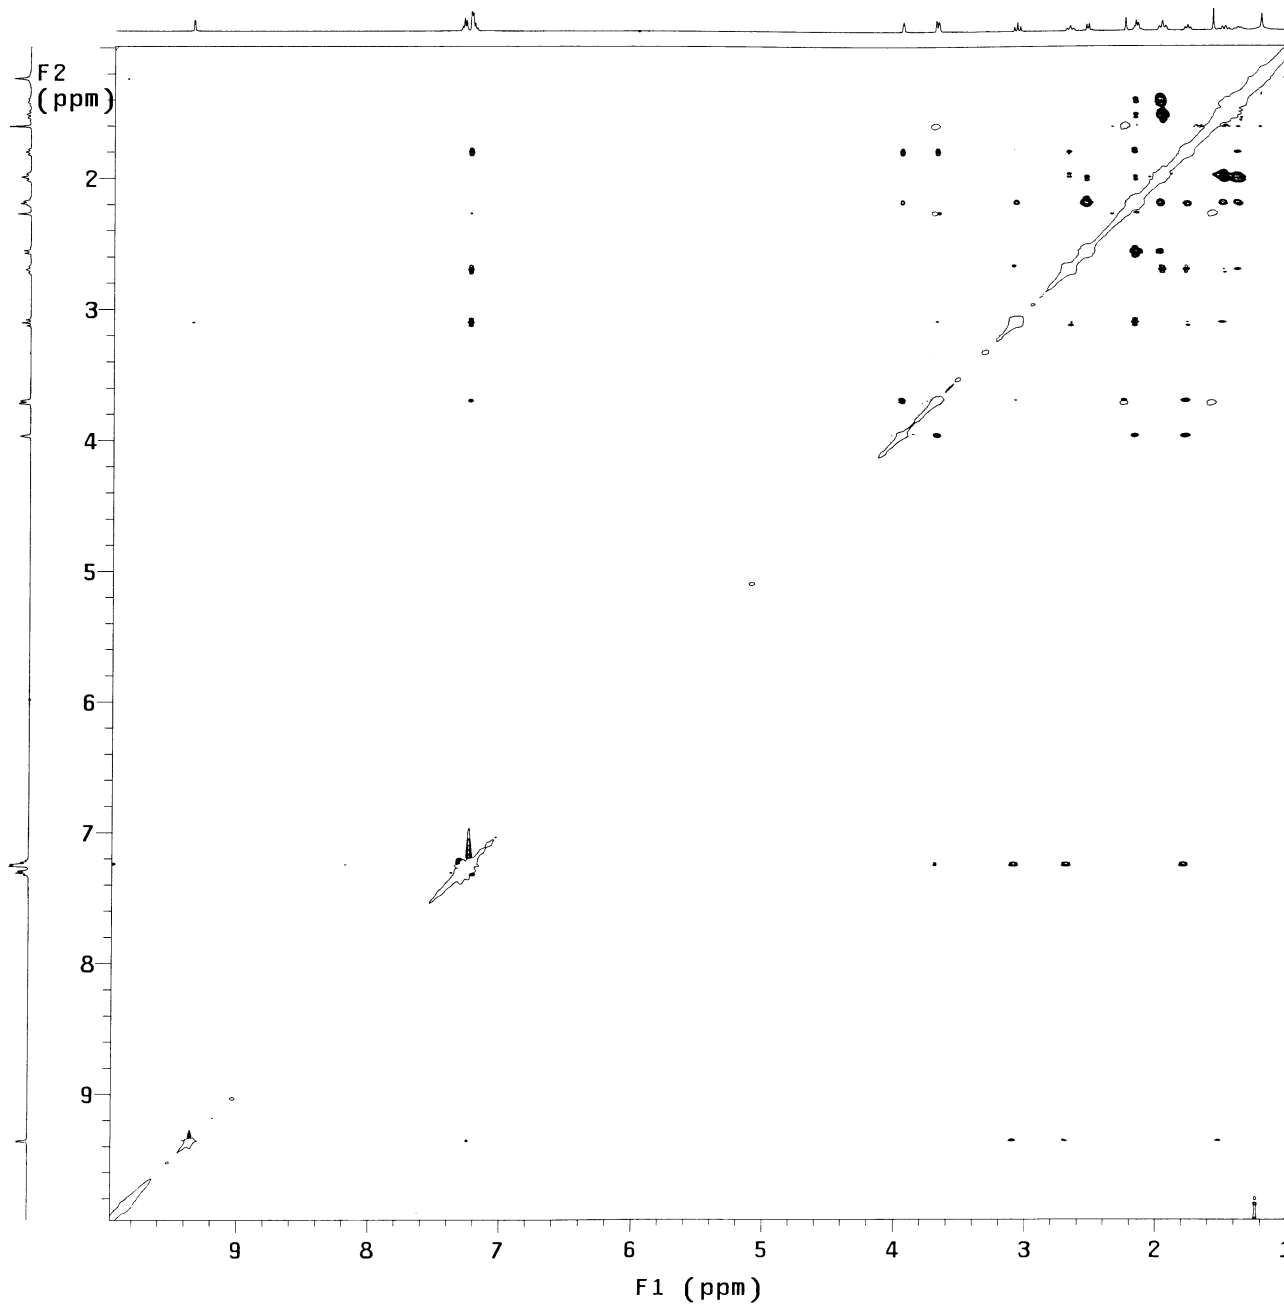



(For comparison)

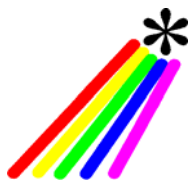

# Chromatogram Report

First line of organization's address

Second line of organization's address

ryn-2-117 racemate col IA 20% EA/Hex

Report produced on 2008/10/18 at 下午 02:21:29 by Put your name here

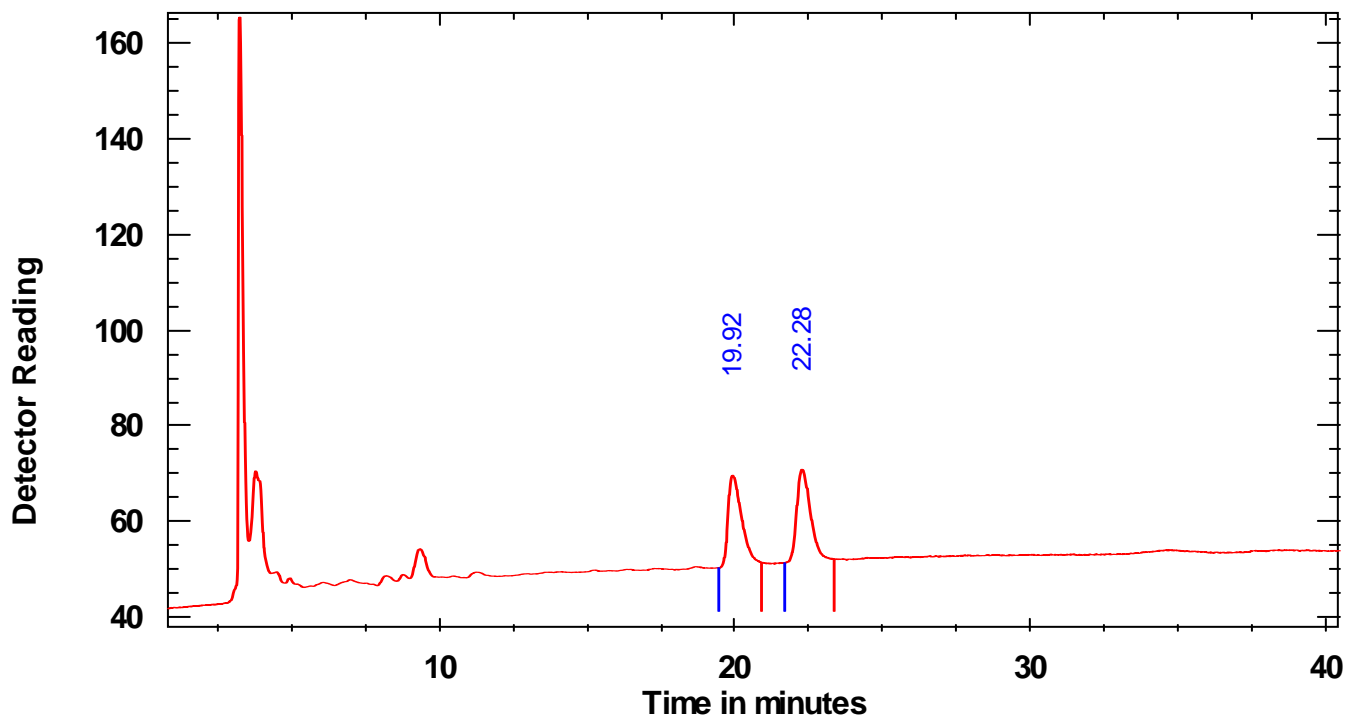

2008/10/18 12:01:06 Flow set to 1.00 at 0.01 minutes

2008/10/18 12:49:52 Run stopped by operator

## PEAK REPORT

| # | begin | end   | area | percent | maximum | time  | begins as | name |
|---|-------|-------|------|---------|---------|-------|-----------|------|
| 1 | 19.46 | 20.90 | 601  | 49.2    | 69.47   | 19.92 | Baseline  |      |
| 2 | 21.69 | 23.36 | 620  | 50.8    | 70.80   | 22.28 | Baseline  |      |



# Chromatogram Report

First line of organization's address  
 Second line of organization's address

ryn-2-121 - col IA 20% EA/Hex

Report produced on 2008/11/16 at 上午 12:22:48 by Put your name here

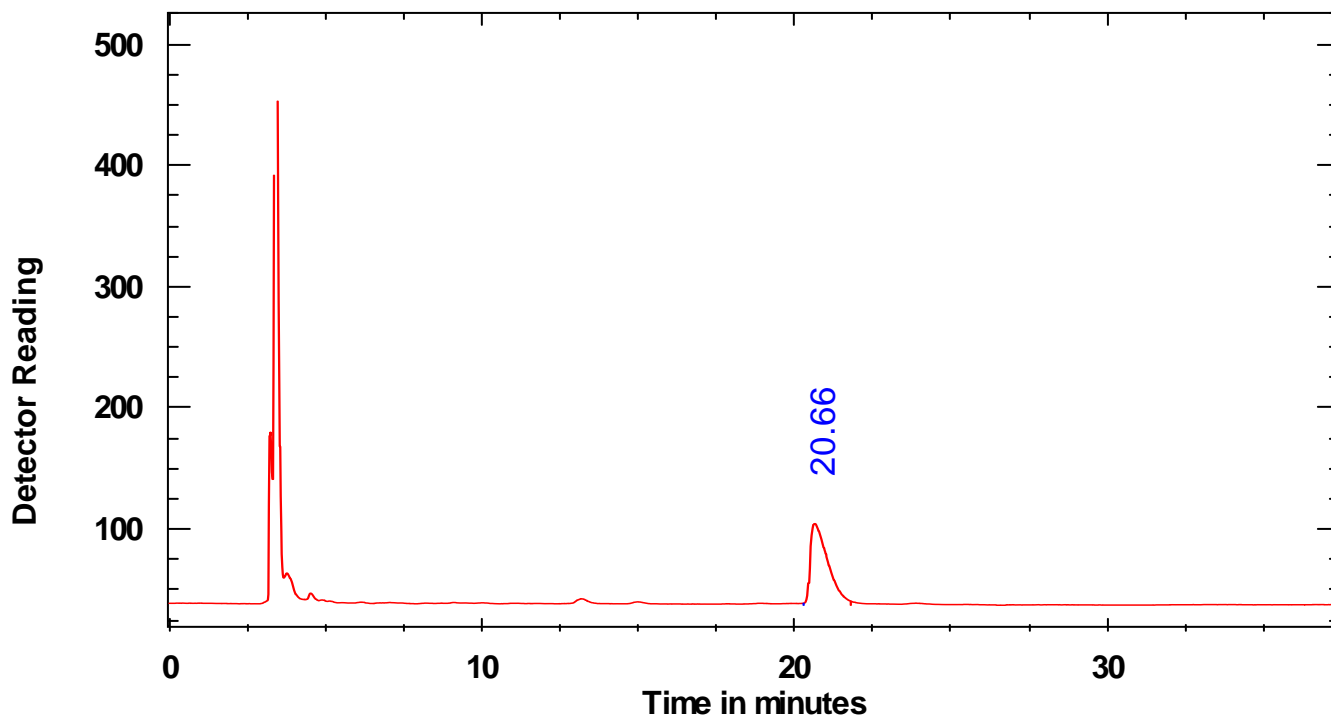

2008/10/18 03:45:29 Flow set to 1.00 at 0.00 minutes

2008/10/18 04:23:23 Run stopped by operator

## PEAK REPORT

| # | begin | end   | area | percent | maximum | time  | begins as | name |
|---|-------|-------|------|---------|---------|-------|-----------|------|
| 1 | 20.29 | 21.80 | 2429 | 100.0   | 104.17  | 20.66 | Baseline  |      |



# Chromatogram Report

First line of organization's address  
 Second line of organization's address

ryn-2-115 chiral col IA 20% EA/Hex

Report produced on 2008/10/18 at 下午 02:24:56 by Put your name here

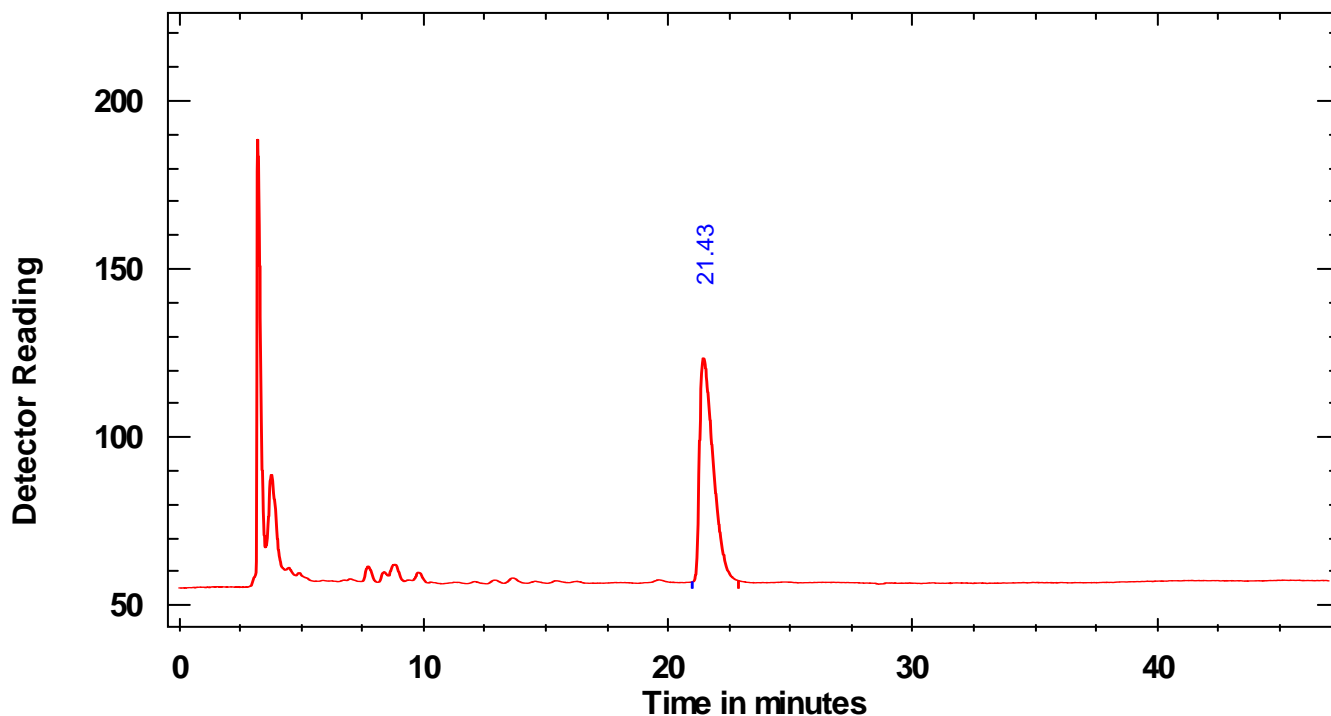

2008/10/18 12:52:19 Flow set to 1.00 at 0.00 minutes

2008/10/18 01:39:23 Run stopped by operator

## PEAK REPORT

| # | begin | end   | area | percent | maximum | time  | begins as | name |
|---|-------|-------|------|---------|---------|-------|-----------|------|
| 1 | 20.98 | 22.87 | 2565 | 100.0   | 123.54  | 21.43 | Baseline  |      |

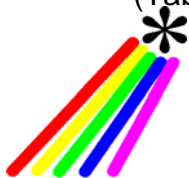

# Chromatogram Report

First line of organization's address

Second line of organization's address

ryn-2-115 - co- col IA 20% EA/Hex

Report produced on 2008/10/18 at 下午 02:26:07 by Put your name here

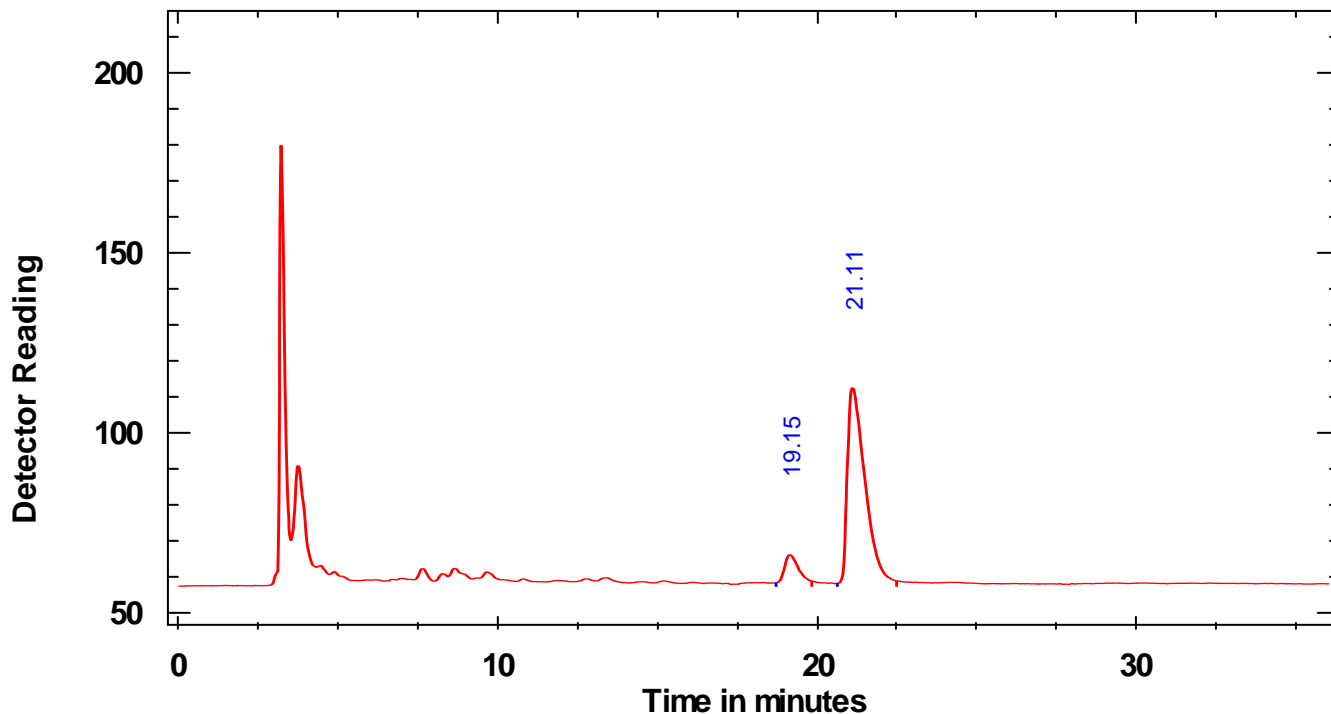

2008/10/18 01:42:02 Flow set to 1.00 at 0.01 minutes

2008/10/18 02:18:07 Run stopped by operator

## PEAK REPORT

| # | begin | end   | area | percent | maximum | time  | begins as | name |
|---|-------|-------|------|---------|---------|-------|-----------|------|
| 1 | 18.72 | 19.84 | 215  | 9.5     | 66.08   | 19.15 | Baseline  |      |
| 2 | 20.64 | 22.49 | 2045 | 90.5    | 112.50  | 21.11 | Baseline  |      |



# Chromatogram Report

First line of organization's address  
 Second line of organization's address

ryn-2-119 - col IA 20% EA/Hex

Report produced on 2008/11/16 at 上午 12:21:30 by Put your name here

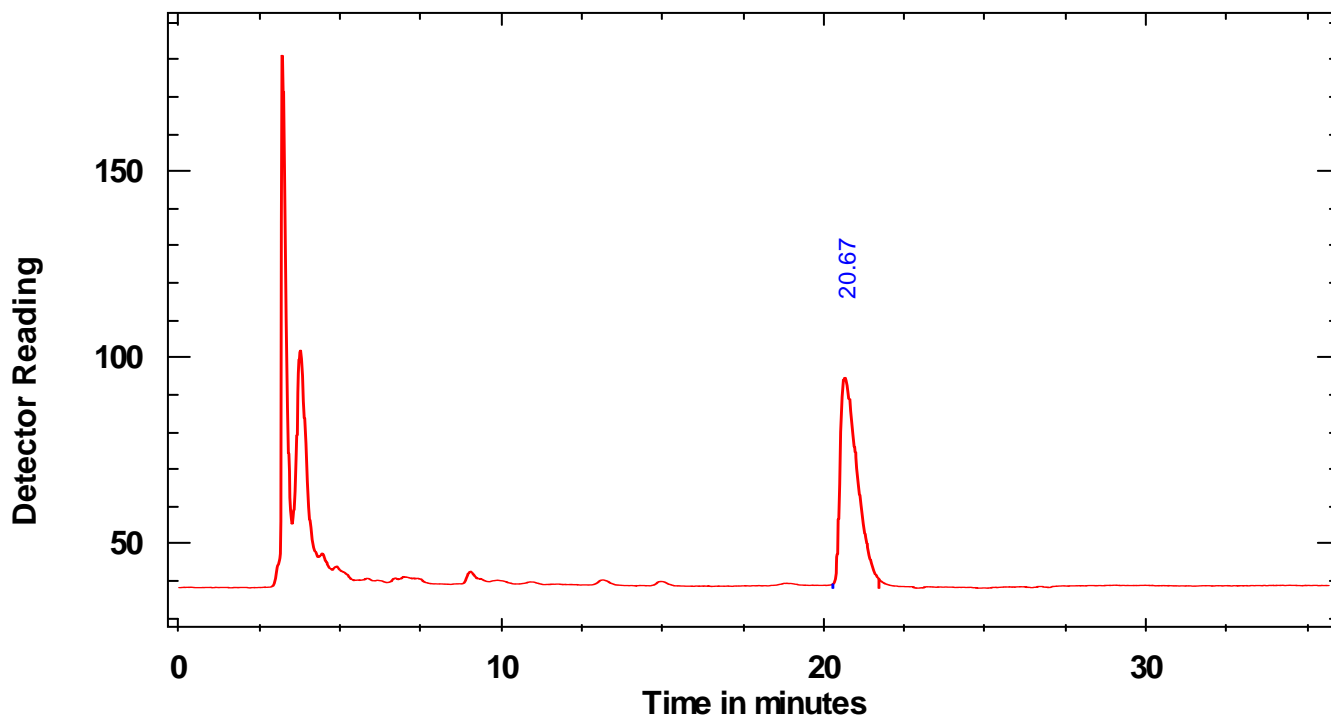

2008/10/18 03:07:12 Flow set to 1.00 at 0.00 minutes

2008/10/18 03:42:57 Run stopped by operator

## PEAK REPORT

| # | begin | end   | area | percent | maximum | time  | begins as | name |
|---|-------|-------|------|---------|---------|-------|-----------|------|
| 1 | 20.29 | 21.72 | 1975 | 100.0   | 94.23   | 20.67 | Baseline  |      |

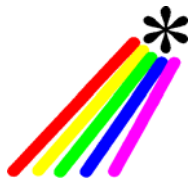

# Chromatogram Report

First line of organization's address

Second line of organization's address

ryn-2-117 racemate 3 col-IA 22% EA/ Hex blank

Report produced on 2008/11/16 at 上午 12:00:38 by Put your name here

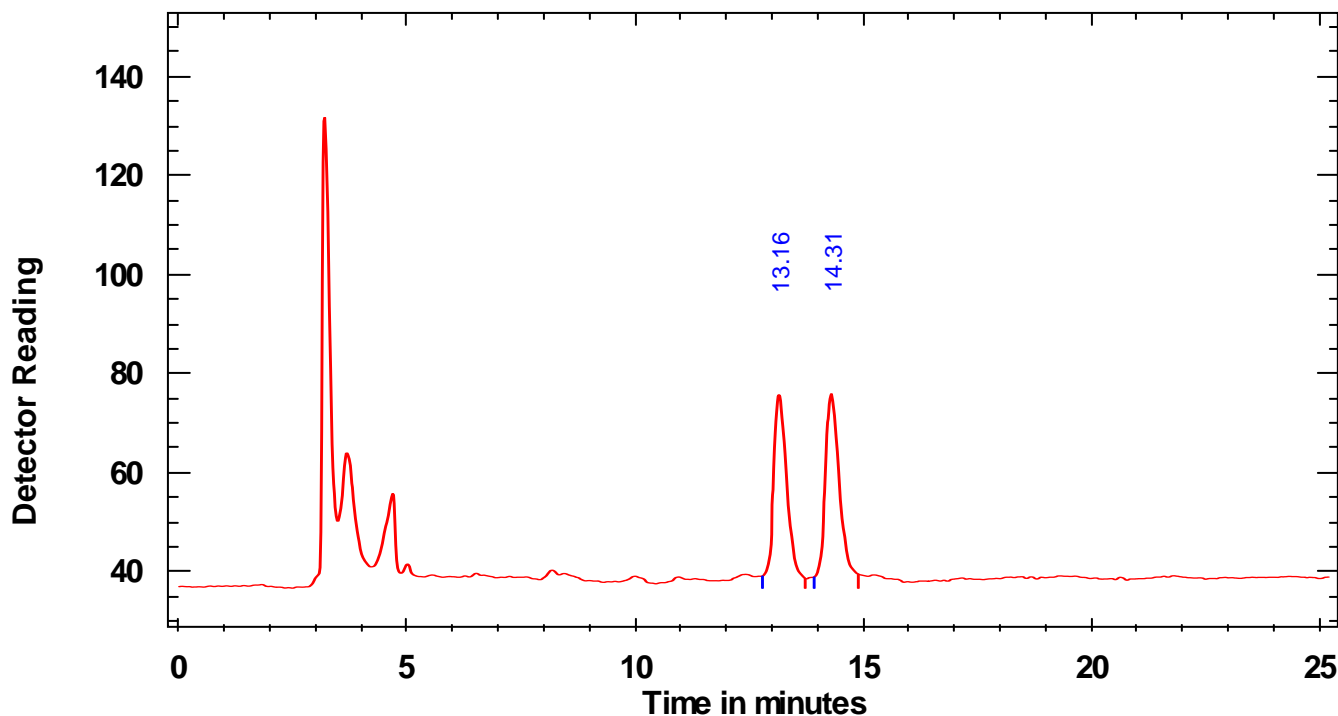

2008/11/15 02:37:55 Flow set to 1.00 at 0.00 minutes

2008/11/15 03:03:12 Run stopped by operator

## PEAK REPORT

| # | begin | end   | area | percent | maximum | time  | begins as | name |
|---|-------|-------|------|---------|---------|-------|-----------|------|
| 1 | 12.80 | 13.73 | 718  | 48.7    | 75.66   | 13.16 | Baseline  |      |
| 2 | 13.93 | 14.90 | 756  | 51.3    | 75.87   | 14.31 | Baseline  |      |



# Chromatogram Report

First line of organization's address  
 Second line of organization's address

ryn-2-125-D chiral col-IA 22% EA/ Hex blank

Report produced on 2008/11/16 at 上午 12:02:16 by Put your name here

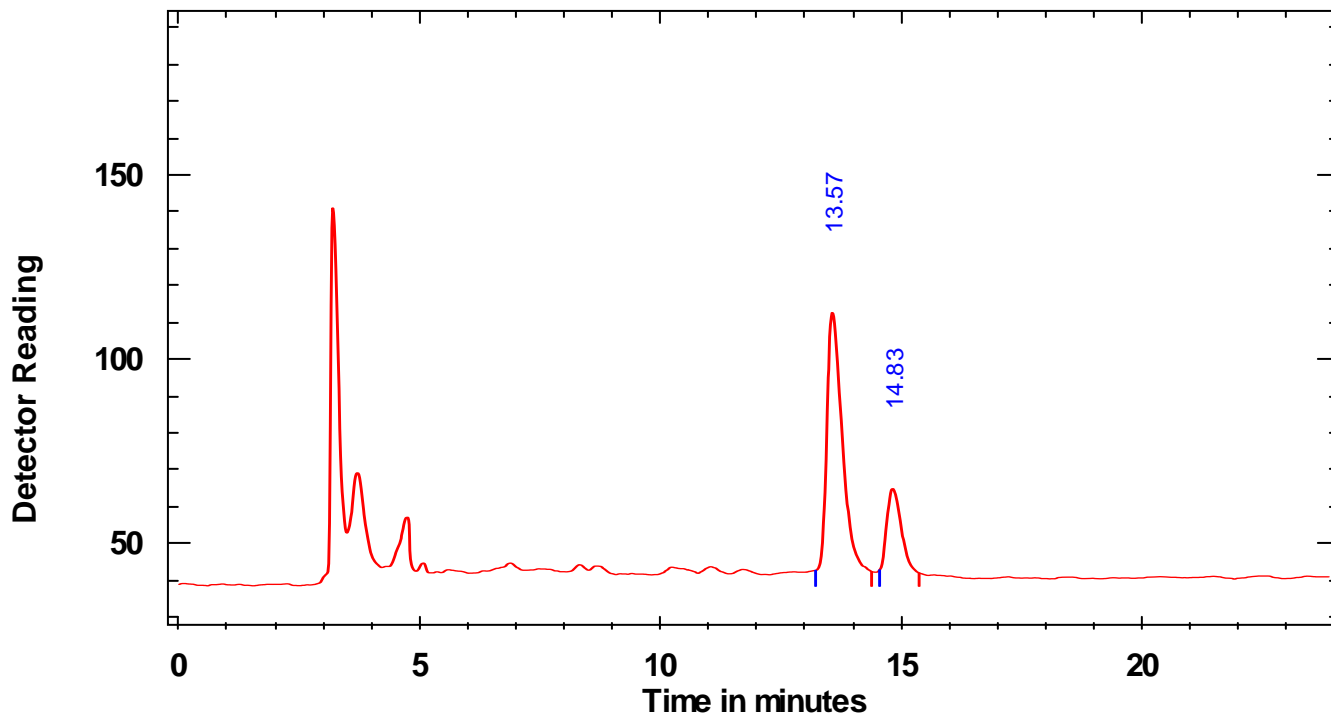

2008/11/15 03:05:19 Flow set to 1.00 at 0.03 minutes

2008/11/15 03:29:12 Run stopped by operator

## PEAK REPORT

| # | begin | end   | area | percent | maximum | time  | begins as | name |
|---|-------|-------|------|---------|---------|-------|-----------|------|
| 1 | 13.22 | 14.39 | 1534 | 77.0    | 112.60  | 13.57 | Baseline  |      |
| 2 | 14.55 | 15.37 | 458  | 23.0    | 64.82   | 14.83 | Baseline  |      |

(For comparison)



# Chromatogram Report

First line of organization's address

Second line of organization's address

ryn-2-117+ryn-2-125-D co-inj col-IA 22% EA/ Hex

Report produced on 2008/11/16 at 上午 12:04:15 by Put your name here

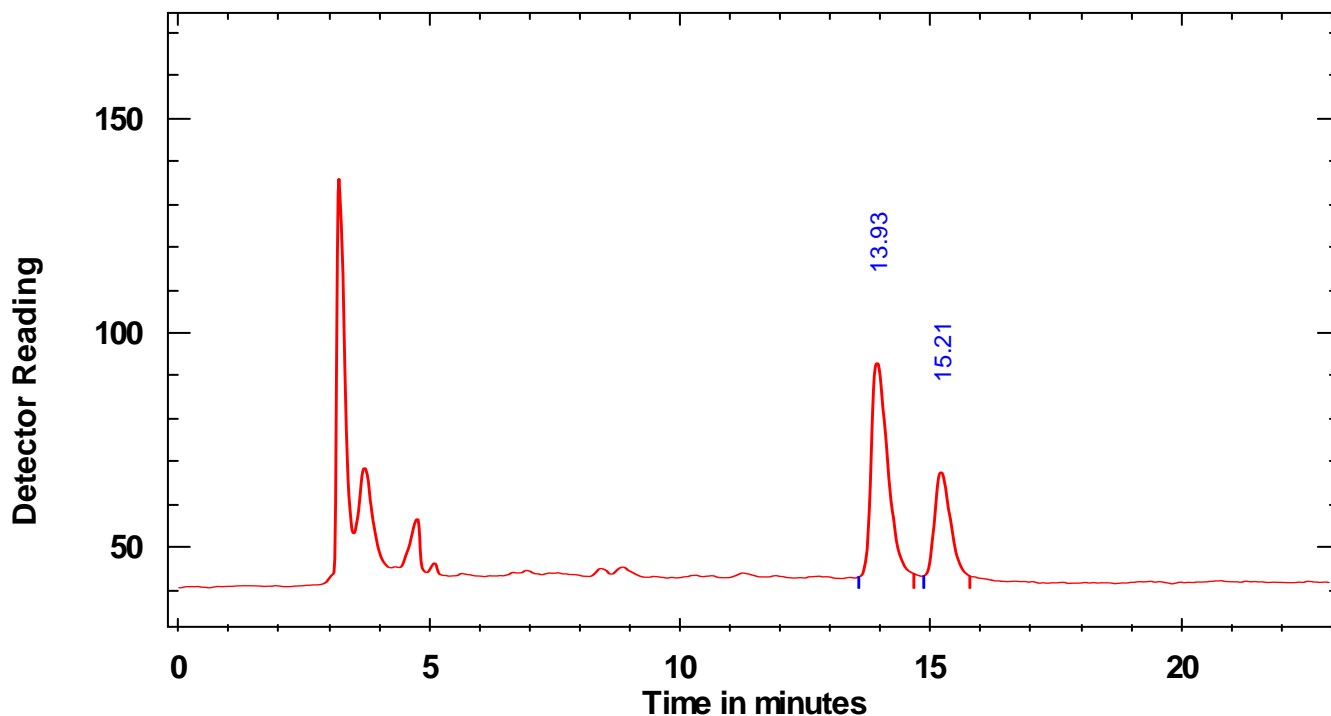

2008/11/15 03:31:13 Flow set to 1.00 at 0.00 minutes

2008/11/15 03:54:13 Run stopped by operator

## PEAK REPORT

| # | begin | end   | area | percent | maximum | time  | begins as | name |
|---|-------|-------|------|---------|---------|-------|-----------|------|
| 1 | 13.57 | 14.67 | 1123 | 68.2    | 92.99   | 13.93 | Baseline  |      |
| 2 | 14.86 | 15.78 | 523  | 31.8    | 67.52   | 15.21 | Baseline  |      |



(For comparison)



# Chromatogram Report

First line of organization's address

Second line of organization's address

ryn-126 racemate IA 20% ea/hex 1ml/min

Report produced on 2009/1/22 at 下午 04:22:36 by Put your name here

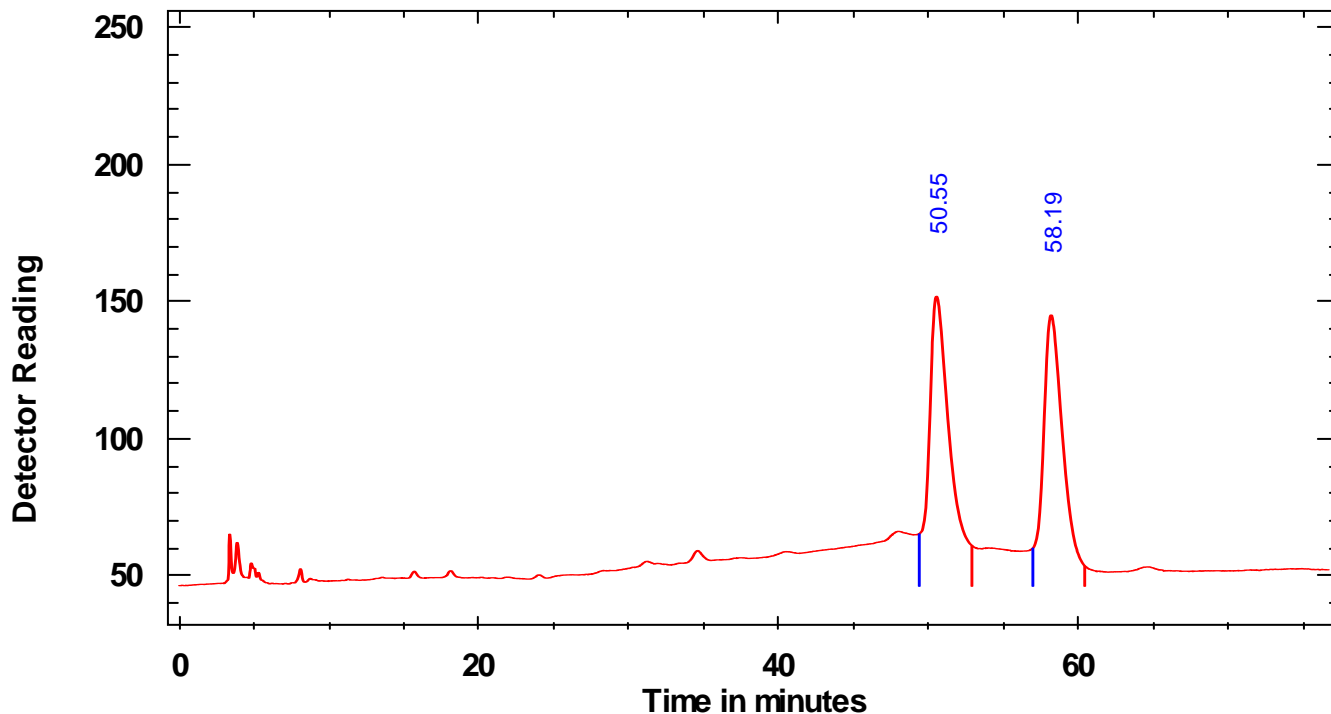

2009/1/22 01:37:08 Flow set to 1.00 at 0.00 minutes

2009/1/22 02:53:53 Run stopped by operator

## PEAK REPORT

| # | begin | end   | area | percent | maximum | time  | begins as | name |
|---|-------|-------|------|---------|---------|-------|-----------|------|
| 1 | 49.38 | 52.89 | 6875 | 49.2    | 151.90  | 50.55 | Baseline  |      |
| 2 | 56.96 | 60.42 | 7098 | 50.8    | 145.08  | 58.19 | Baseline  |      |



# Chromatogram Report

First line of organization's address  
 Second line of organization's address

ryn-122 chiral IA 20% ea/hex 1ml/min

Report produced on 2009/1/22 at 下午 04:24:18 by Put your name here

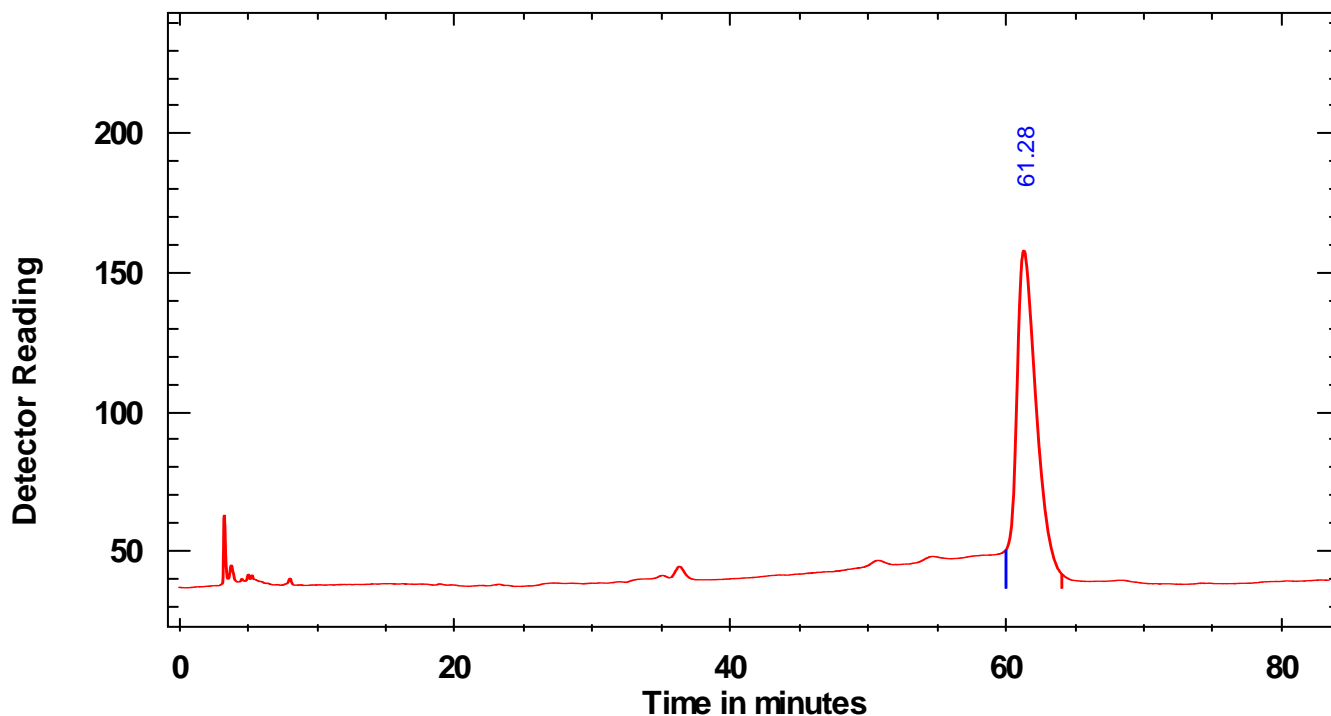

2009/1/22 02:56:22 Flow set to 1.00 at 0.01 minutes

2009/1/22 04:19:49 Run stopped by operator

## PEAK REPORT

| # | begin | end   | area  | percent | maximum | time  | begins as | name |
|---|-------|-------|-------|---------|---------|-------|-----------|------|
| 1 | 59.98 | 64.03 | 10203 | 100.0   | 158.08  | 61.28 | Baseline  |      |

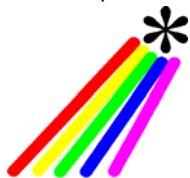

# Chromatogram Report

First line of organization's address  
Second line of organization's address

ryn-2-122 +ryn-2-126 co inj col-IA 20% EA/ Hex

Report produced on 2008/11/16 at 上午 12:14:56 by Put your name here

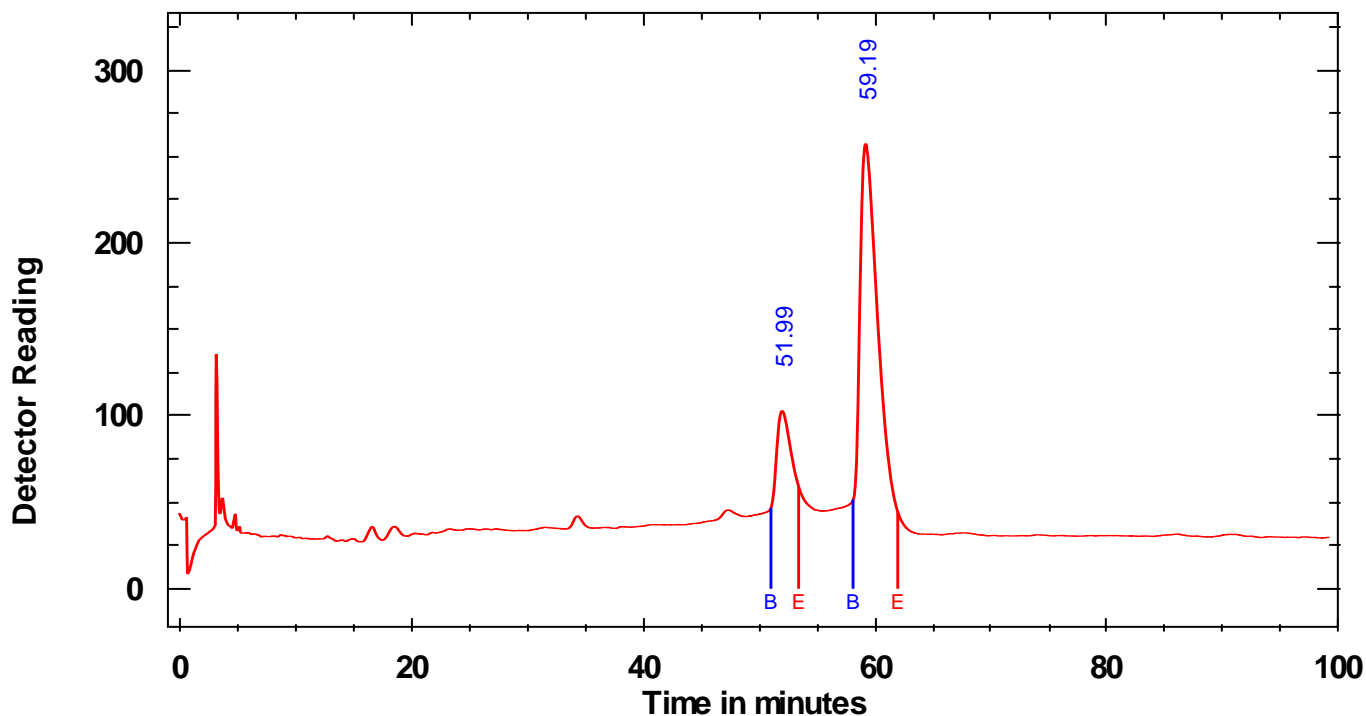

2008/11/15 07:17:54 Flow set to 1.00 at 0.01 minutes

2008/11/15 08:57:04 Run stopped by operator

## PEAK REPORT

| # | begin | end   | area  | percent | maximum | time  | begins as | name |
|---|-------|-------|-------|---------|---------|-------|-----------|------|
| 1 | 51.02 | 53.42 | 3863  | 15.5    | 102.75  | 51.99 | Baseline  |      |
| 2 | 58.11 | 61.95 | 21082 | 84.5    | 257.49  | 59.19 | Baseline  |      |

(For comparison)



# Chromatogram Report

First line of organization's address

Second line of organization's address

ryn-2-128 racemate col-IA 20% EA/ Hex

Report produced on 2008/11/16 at 上午 12:16:03 by Put your name here

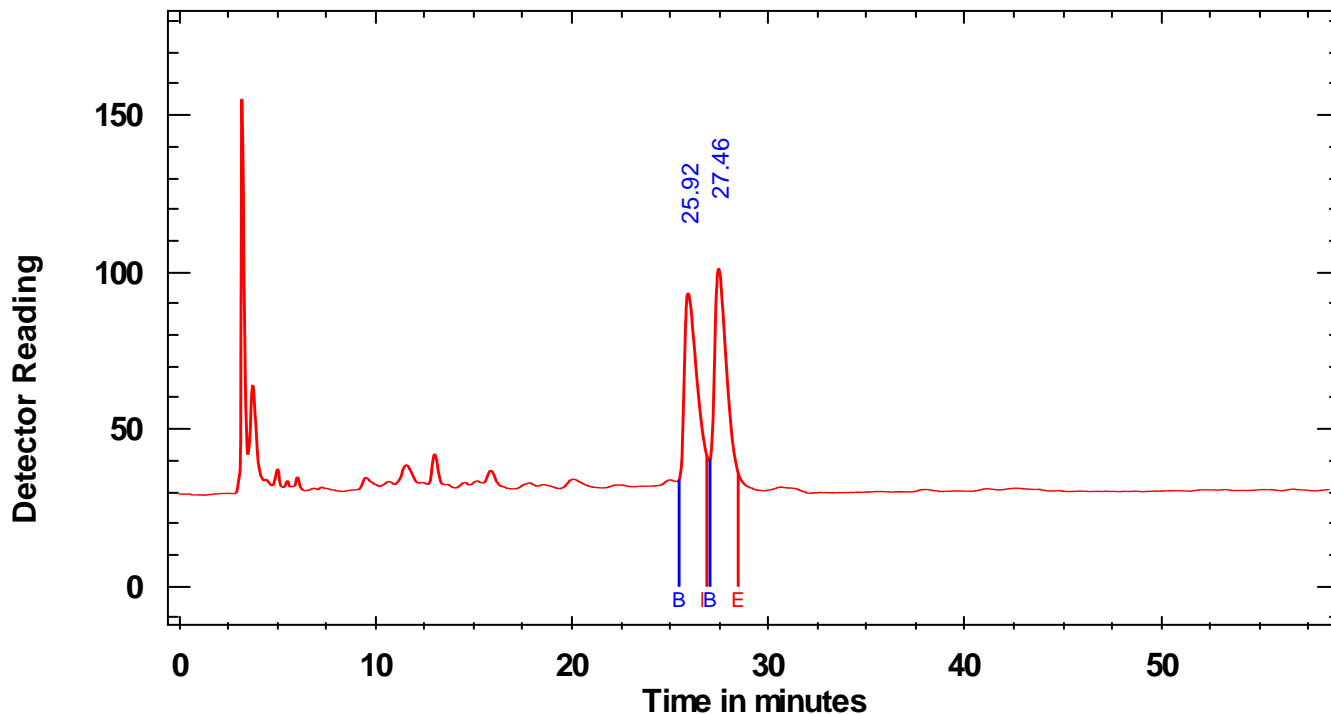

2008/11/15 08:59:15 Flow set to 1.00 at 0.00 minutes

2008/11/15 09:57:51 Run stopped by operator

## PEAK REPORT

| # | begin | end   | area | percent | maximum | time  | begins as | name |
|---|-------|-------|------|---------|---------|-------|-----------|------|
| 1 | 25.46 | 26.87 | 2266 | 48.2    | 93.31   | 25.92 | Baseline  |      |
| 2 | 27.04 | 28.46 | 2436 | 51.8    | 101.15  | 27.46 | Baseline  |      |

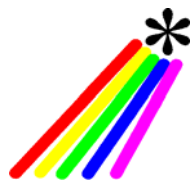

# Chromatogram Report

First line of organization's address  
 Second line of organization's address

ryn-2-127 chiral col-IA 20% EA/ Hex

Report produced on 2008/11/16 at 上午 12:17:23 by Put your name here

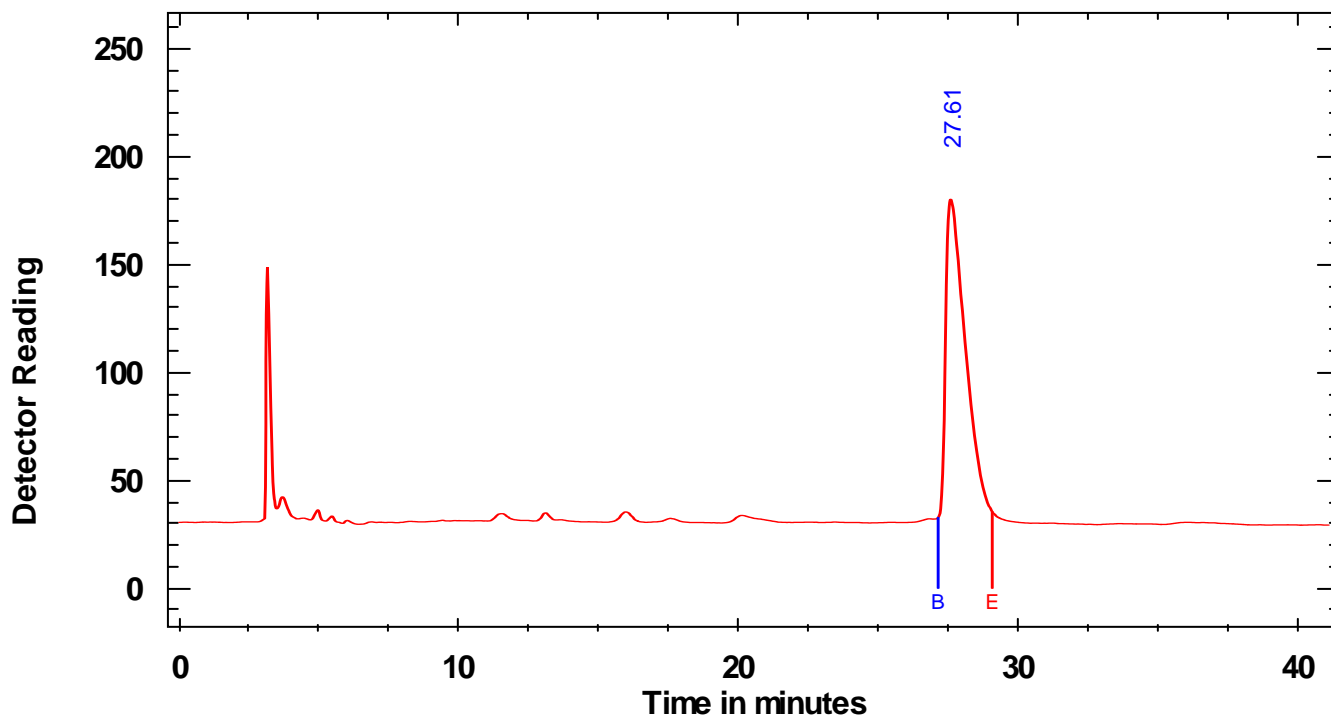

2008/11/15 09:59:46 Flow set to 1.00 at 0.01 minutes

2008/11/15 10:40:57 Run stopped by operator

## PEAK REPORT

| # | begin | end   | area | percent | maximum | time  | begins as | name |
|---|-------|-------|------|---------|---------|-------|-----------|------|
| 1 | 27.17 | 29.10 | 7089 | 100.0   | 180.17  | 27.61 | Baseline  |      |



# Chromatogram Report

First line of organization's address

Second line of organization's address

ryn-2-127+ryn-2-128 co inj col-IA 20% EA/ Hex

Report produced on 2008/11/16 at 上午 12:18:31 by Put your name here

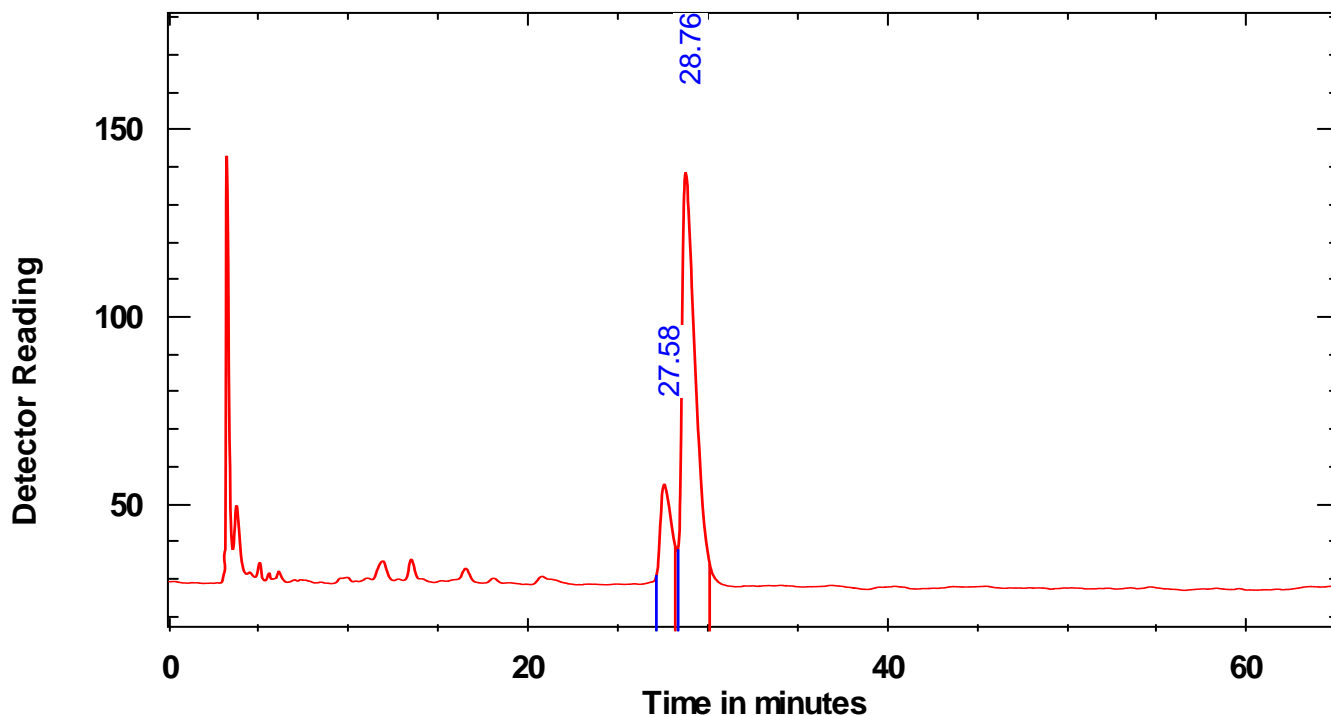

2008/11/15 10:43:29 Flow set to 1.00 at 0.03 minutes

2008/11/15 11:49:51 Run stopped by operator

## PEAK REPORT

| # | begin | end   | area | percent | maximum | time  | begins as | name |
|---|-------|-------|------|---------|---------|-------|-----------|------|
| 1 | 27.14 | 28.19 | 710  | 12.9    | 55.31   | 27.58 | Baseline  |      |
| 2 | 28.35 | 30.11 | 4777 | 87.1    | 138.56  | 28.76 | Baseline  |      |

(For comparison)

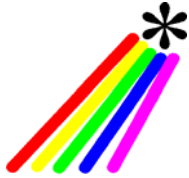

# Chromatogram Report

First line of organization's address  
 Second line of organization's address

RYN-2-131 racemate col IA 20% Ea/Hex

Report produced on 2008/11/17 at 下午 11:34:12 by Put your name here

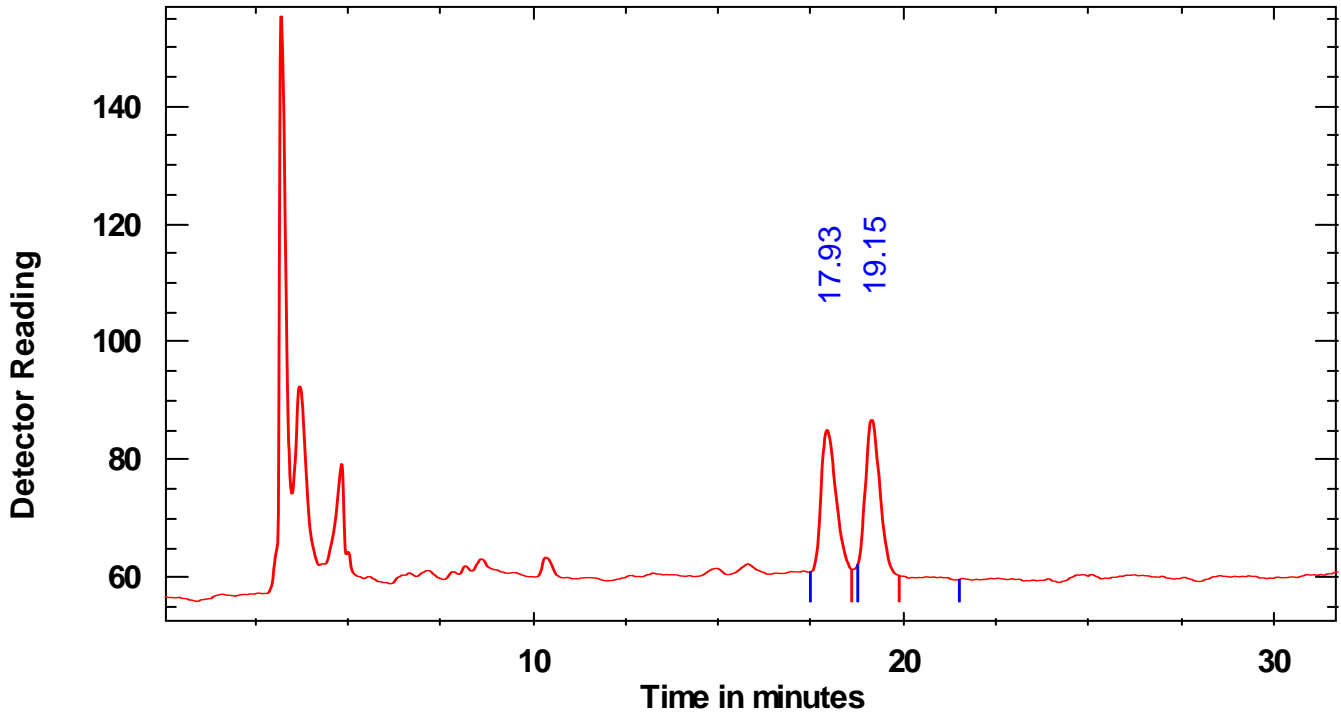

2008/11/17 12:10:18 Flow set to 1.00 at 0.00 minutes

2008/11/17 12:49:18 Run stopped by operator

**PEAK REPORT**

| # | begin | end   | area | percent | maximum | time  | begins as | name |
|---|-------|-------|------|---------|---------|-------|-----------|------|
| 1 | 17.49 | 18.60 | 657  | 49.7    | 85.06   | 17.93 | Baseline  |      |
| 2 | 18.77 | 19.88 | 666  | 50.3    | 86.75   | 19.15 | Baseline  |      |



# Chromatogram Report

First line of organization's address  
 Second line of organization's address

RYN-2-129 chiral col IA 20% Ea/Hex

Report produced on 2008/11/17 at 下午 11:35:58 by Put your name here

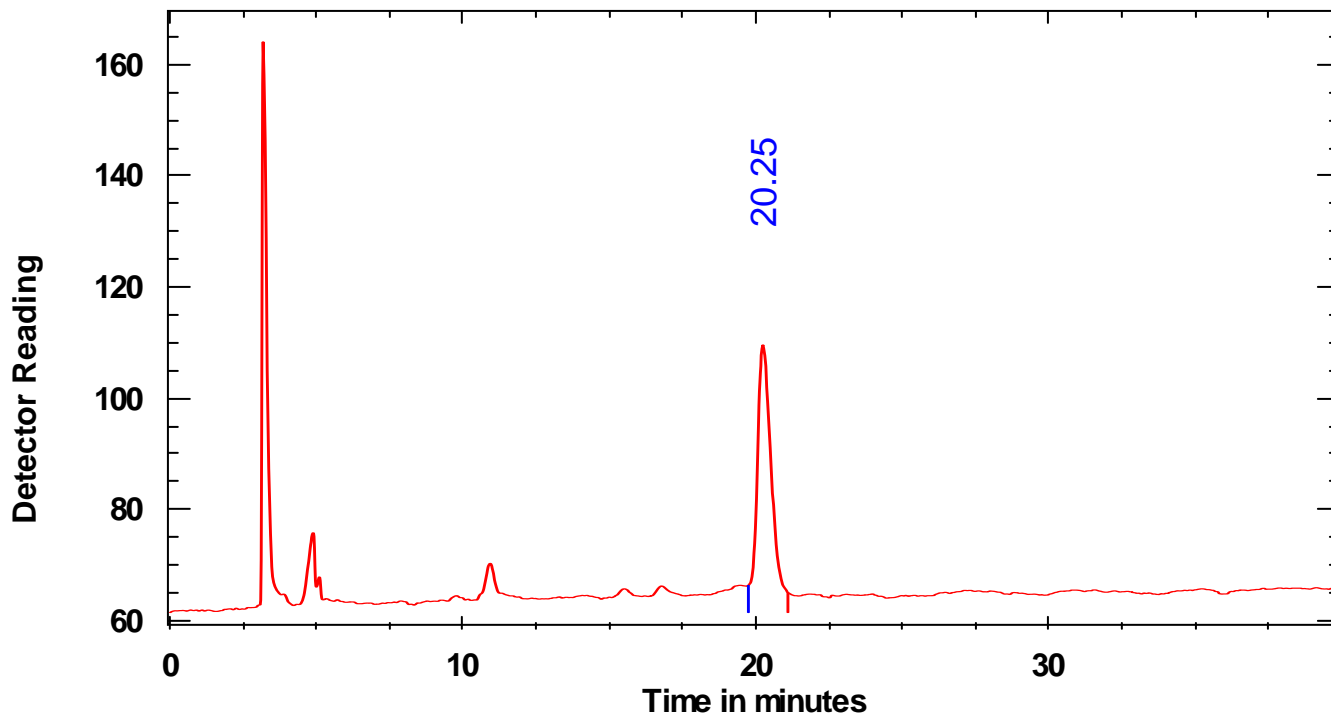

2008/11/17 12:51:08 Flow set to 1.00 at 0.00 minutes  
 2008/11/17 01:57:19 Run stopped by operator

**PEAK REPORT**

| # | begin | end   | area | percent | maximum | time  | begins as | name |
|---|-------|-------|------|---------|---------|-------|-----------|------|
| 1 | 19.75 | 21.10 | 1316 | 100.0   | 109.57  | 20.25 | Baseline  |      |



(For comparison)



# Chromatogram Report

First line of organization's address

Second line of organization's address

RYN-2-129 + RYN-2-131 co inj col IA 20% Ea/Hex

Report produced on 2008/11/17 at 下午 11:37:35 by Put your name here

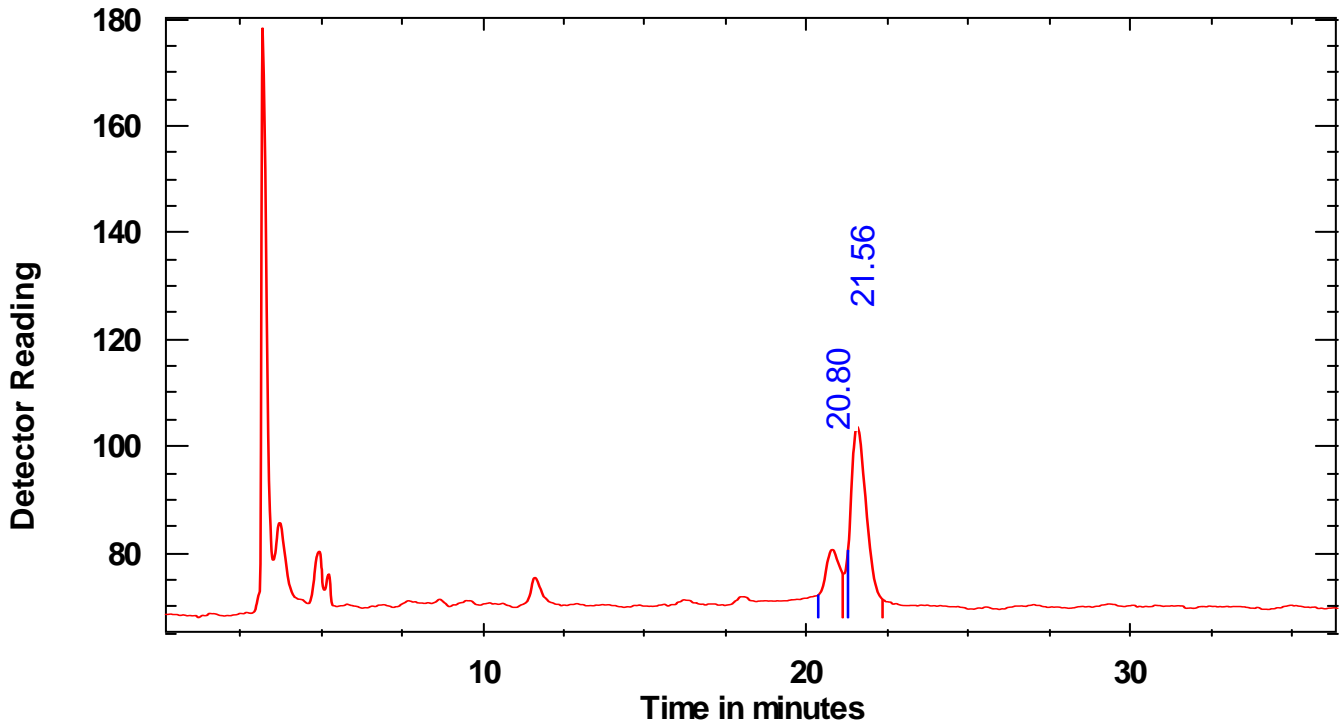

2008/11/17 02:00:51 Flow set to 1.00 at 0.00 minutes

2008/11/17 02:40:20 Run stopped by operator

### PEAK REPORT

| # | begin | end   | area | percent | maximum | time  | begins as | name |
|---|-------|-------|------|---------|---------|-------|-----------|------|
| 1 | 20.36 | 21.11 | 138  | 16.3    | 80.64   | 20.80 | Baseline  |      |
| 2 | 21.28 | 22.35 | 708  | 83.7    | 103.68  | 21.56 | Baseline  |      |



# Chromatogram Report

First line of organization's address  
Second line of organization's address

RYN-2-132 racemate col IA 10% Ea/Hex

Report produced on 2008/11/20 at 下午 02:09:27 by Put your name here

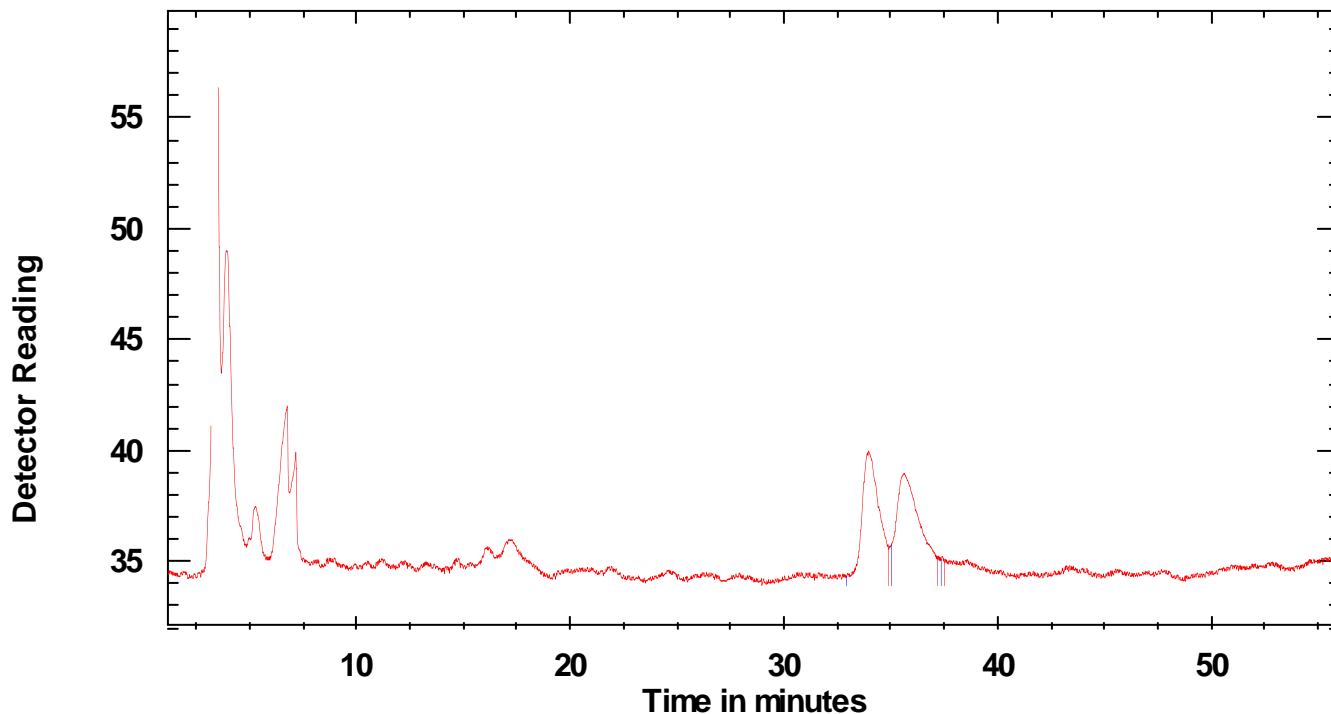

2008/11/19 04:14:53 Flow set to 1.00 at 0.01 minutes

2008/11/19 05:12:27 Run stopped by operator

## PEAK REPORT

| # | begin | end   | area | percent | maximum | time  | begins as | name |
|---|-------|-------|------|---------|---------|-------|-----------|------|
| 1 | 32.93 | 34.88 | 221  | 52.6    | 39.89   | 33.98 | Baseline  |      |
| 2 | 35.04 | 37.18 | 198  | 47.2    | 38.95   | 35.63 | Baseline  |      |



# Chromatogram Report

First line of organization's address  
 Second line of organization's address

RYN-2-130 chiral col IA 10% Ea/Hex

Report produced on 2008/11/20 at 下午 02:10:37 by Put your name here

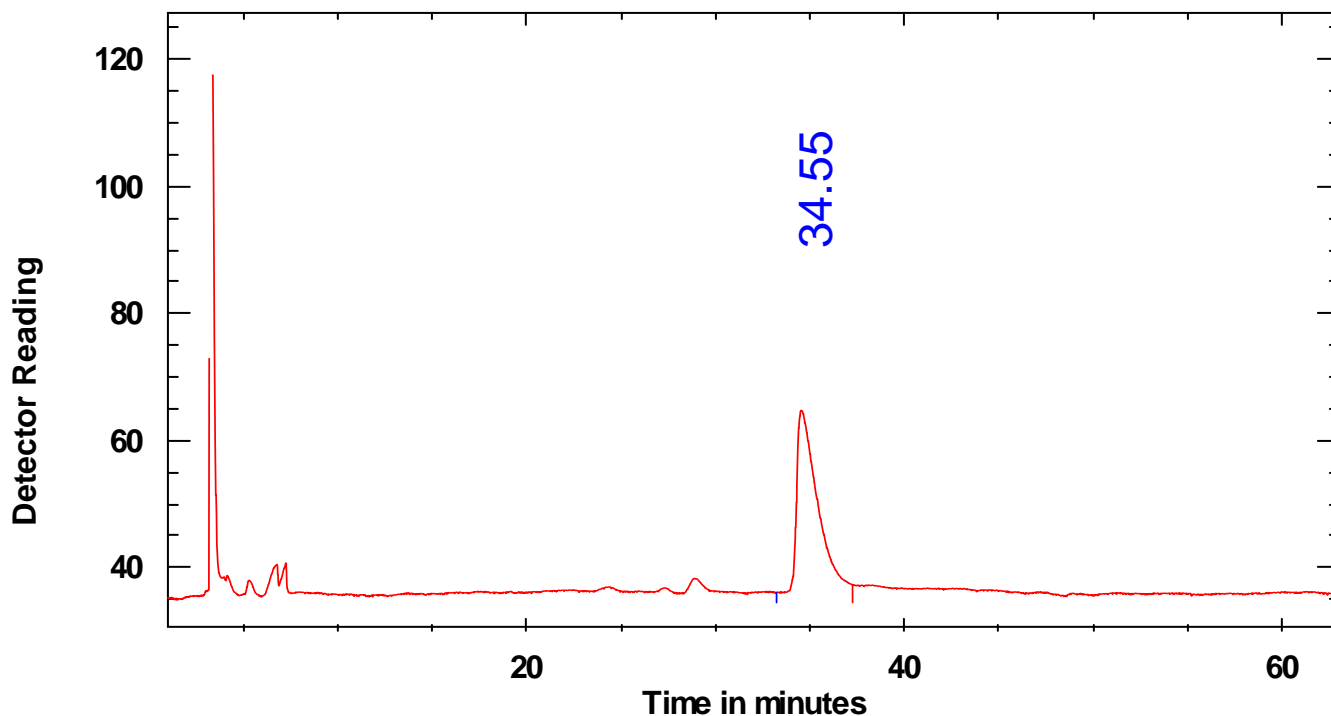

2008/11/19 05:14:50 Flow set to 1.00 at 0.01 minutes

2008/11/19 06:18:47 Run stopped by operator

## PEAK REPORT

| # | begin | end   | area | percent | maximum | time  | begins as | name |
|---|-------|-------|------|---------|---------|-------|-----------|------|
| 1 | 33.24 | 37.26 | 2035 | 100.0   | 64.69   | 34.55 | Baseline  |      |

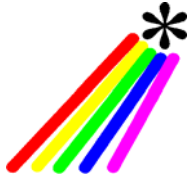

# Chromatogram Report

First line of organization's address  
Second line of organization's address

RYN-2-130 + 132 co injection col IA 10% Ea/Hex

Report produced on 2008/11/20 at 下午 02:12:44 by Put your name here

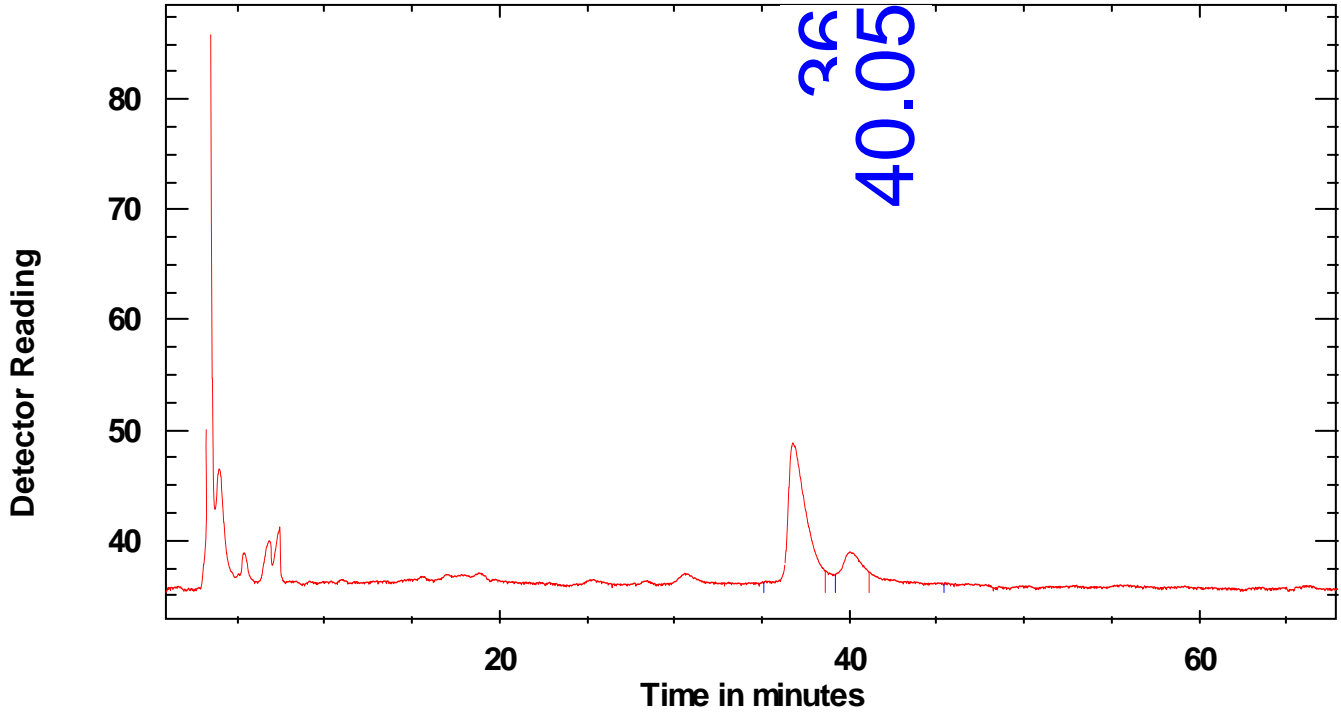

2008/11/19 06:20:31 Flow set to 1.00 at 0.00 minutes

2008/11/19 07:29:38 Run stopped by operator

## PEAK REPORT

| # | begin | end   | area | percent | maximum | time  | begins as | name |
|---|-------|-------|------|---------|---------|-------|-----------|------|
| 1 | 35.11 | 38.62 | 766  | 87.0    | 48.78   | 36.78 | Baseline  |      |
| 2 | 39.19 | 41.13 | 114  | 13.0    | 38.94   | 40.05 | Baseline  |      |



# Chromatogram Report

First line of organization's address  
Second line of organization's address

RYN-2-136 racemate 2 col IA 20% Ea/Hex

Report produced on 2008/11/17 at 下午 11:45:00 by Put your name here

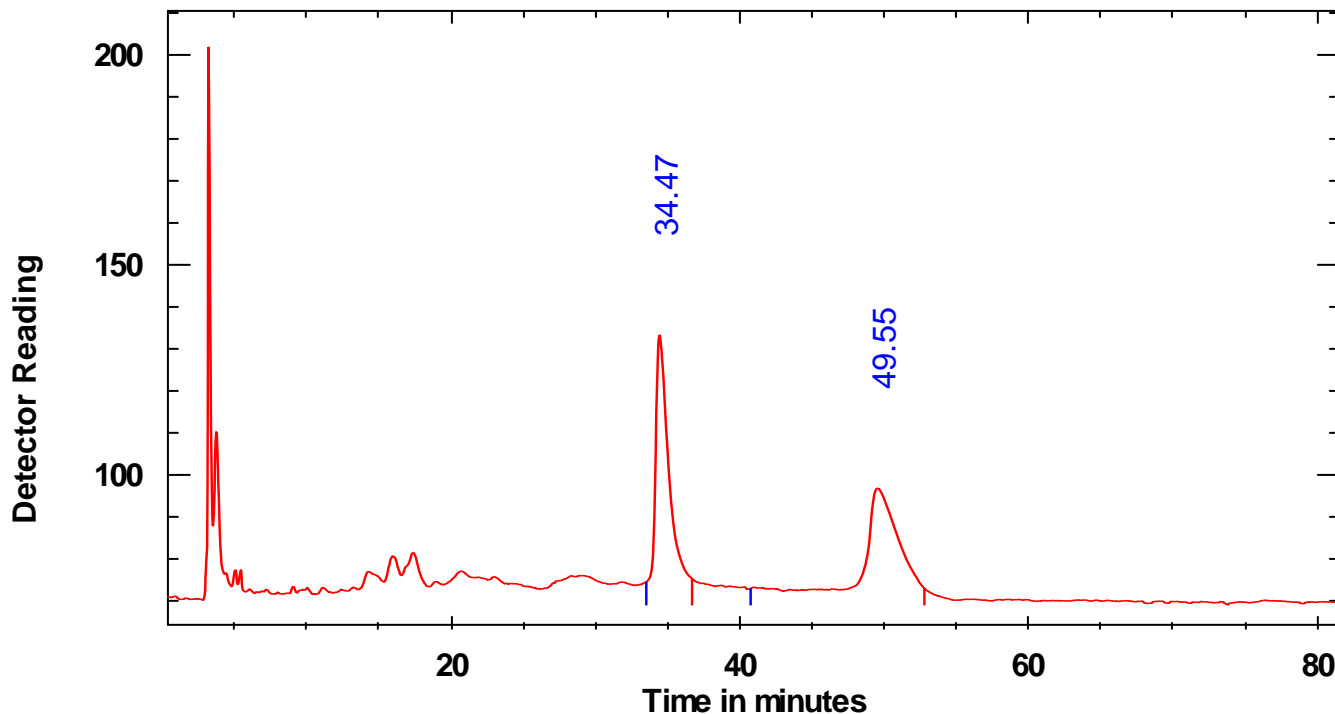

2008/11/17 04:43:12 Flow set to 1.00 at 0.00 minutes

2008/11/17 06:05:21 Run stopped by operator

## PEAK REPORT

| # | begin | end   | area | percent | maximum | time  | begins as | name |
|---|-------|-------|------|---------|---------|-------|-----------|------|
| 1 | 33.53 | 36.70 | 3423 | 53.1    | 133.20  | 34.47 | Baseline  |      |
| 2 | 40.75 | 52.80 | 3026 | 46.9    | 96.82   | 49.55 | Baseline  |      |



# Chromatogram Report

First line of organization's address  
 Second line of organization's address

RYN-2-133 chiral 2 col IA 20% Ea/Hex

Report produced on 2008/11/17 at 下午 11:46:39 by Put your name here

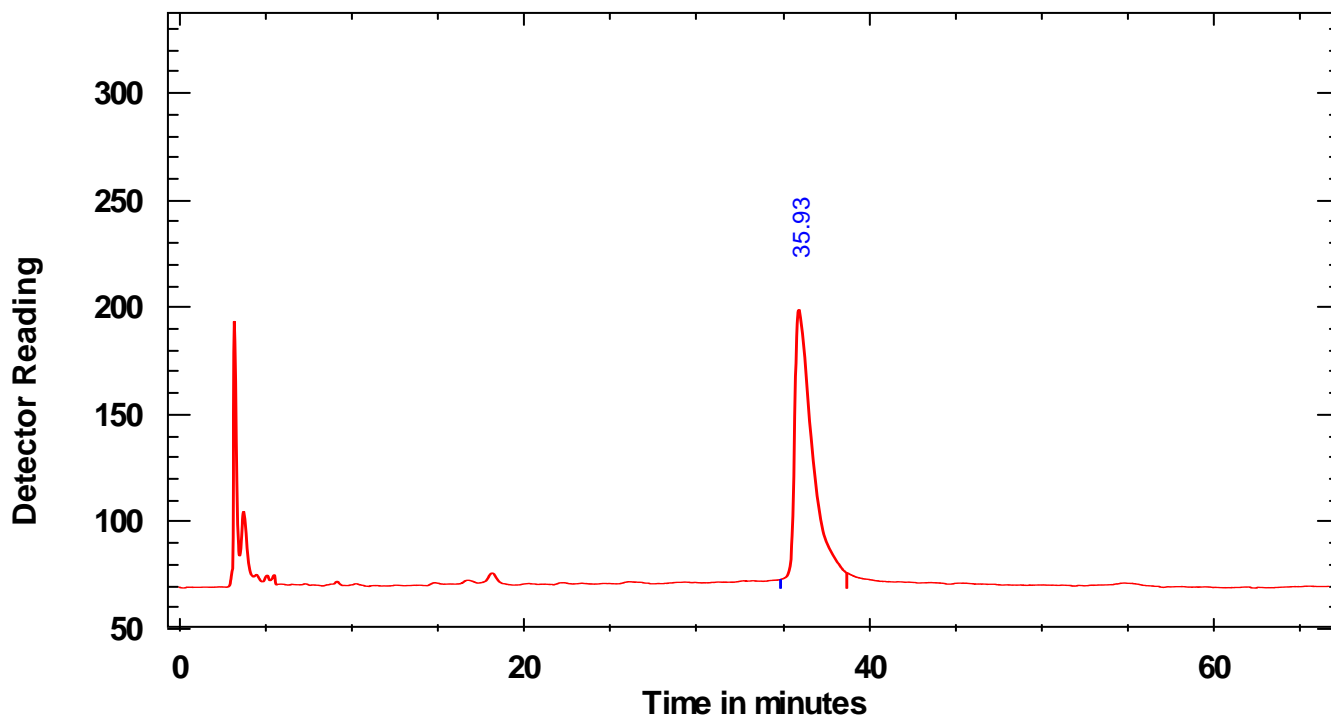

2008/11/17 06:08:00 Flow set to 1.00 at 0.01 minutes

2008/11/17 07:14:40 Run stopped by operator

## PEAK REPORT

| # | begin | end   | area | percent | maximum | time  | begins as | name |
|---|-------|-------|------|---------|---------|-------|-----------|------|
| 1 | 34.85 | 38.69 | 8587 | 100.0   | 198.94  | 35.93 | Baseline  |      |



# Chromatogram Report

First line of organization's address  
Second line of organization's address

RYN-2-133 + RYN-2-136 co inj col IA 20% Ea/Hex

Report produced on 2008/11/17 at 下午 11:50:27 by Put your name here

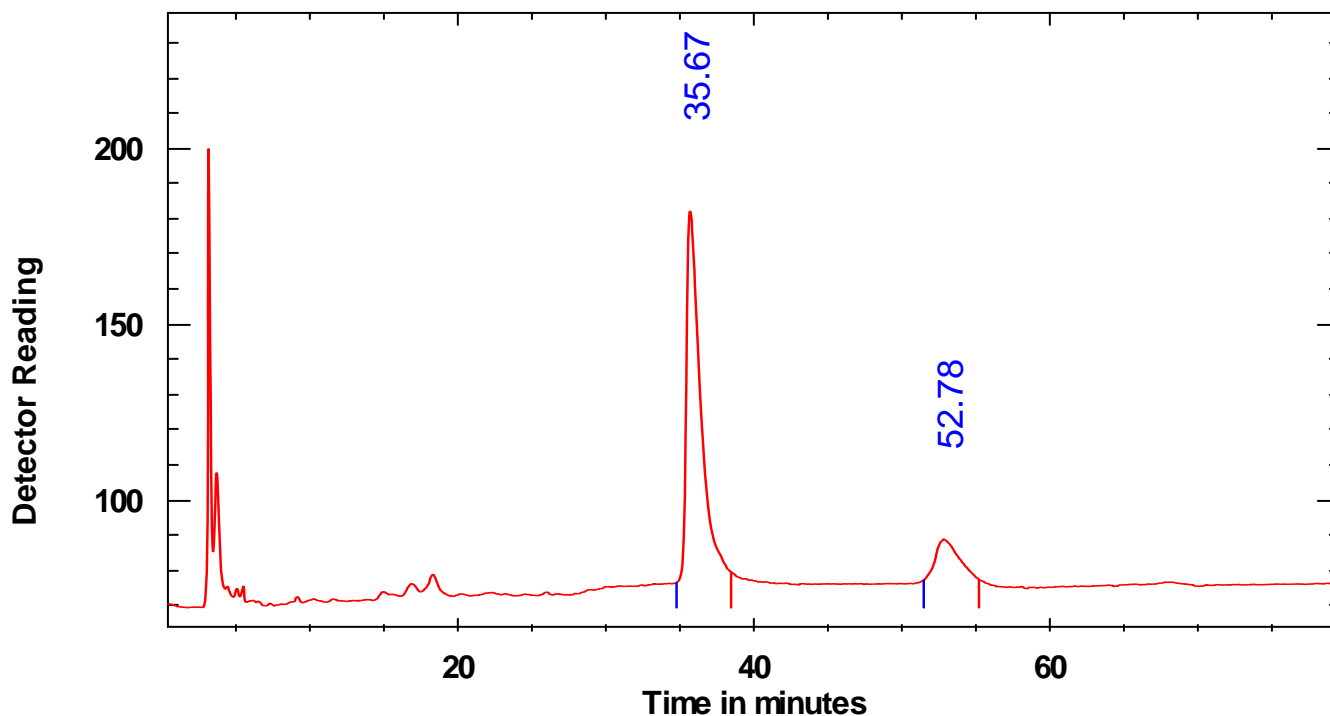

2008/11/17 07:16:45 Flow set to 1.00 at 0.01 minutes

2008/11/17 08:46:06 Run stopped by operator

## PEAK REPORT

| # | begin | end   | area | percent | maximum | time  | begins as | name |
|---|-------|-------|------|---------|---------|-------|-----------|------|
| 1 | 34.76 | 38.44 | 6831 | 84.7    | 182.09  | 35.67 | Baseline  |      |
| 2 | 51.45 | 55.17 | 1238 | 15.3    | 88.84   | 52.78 | Baseline  |      |



# Chromatogram Report

First line of organization's address  
Second line of organization's address

RYN-2-139 racemate col IA 20% Ea/Hex

Report produced on 2008/11/20 at 下午 02:49:39 by Put your name here

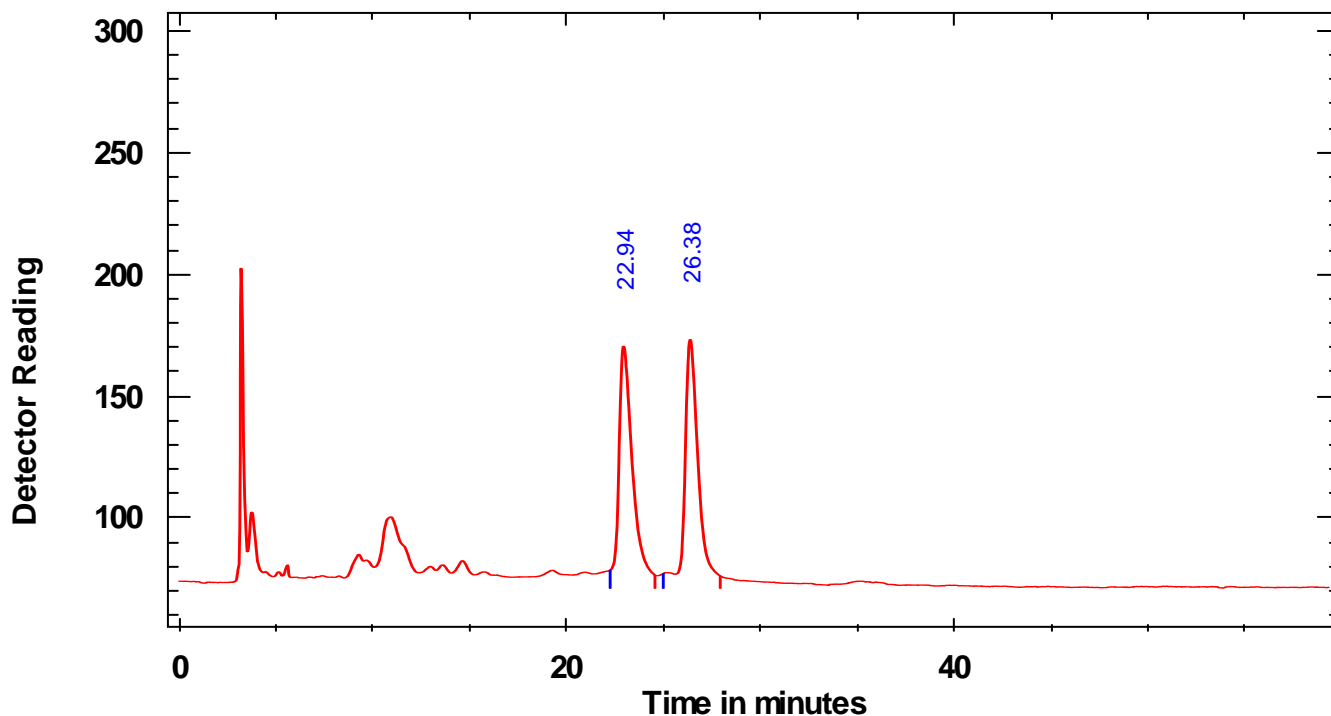

2008/11/17 08:48:14 Flow set to 1.00 at 0.00 minutes  
2008/11/17 09:47:36 Run stopped by operator

## PEAK REPORT

| # | begin | end   | area | percent | maximum | time  | begins as | name |
|---|-------|-------|------|---------|---------|-------|-----------|------|
| 1 | 22.25 | 24.56 | 4155 | 50.3    | 170.42  | 22.94 | Baseline  |      |
| 2 | 24.99 | 27.92 | 4111 | 49.7    | 173.18  | 26.38 | Baseline  |      |



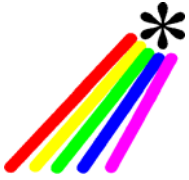

# Chromatogram Report

First line of organization's address  
 Second line of organization's address

RYN-2-138 chiral col IA 20% Ea/Hex

Report produced on 2008/11/17 at 下午 10:35:07 by Put your name here

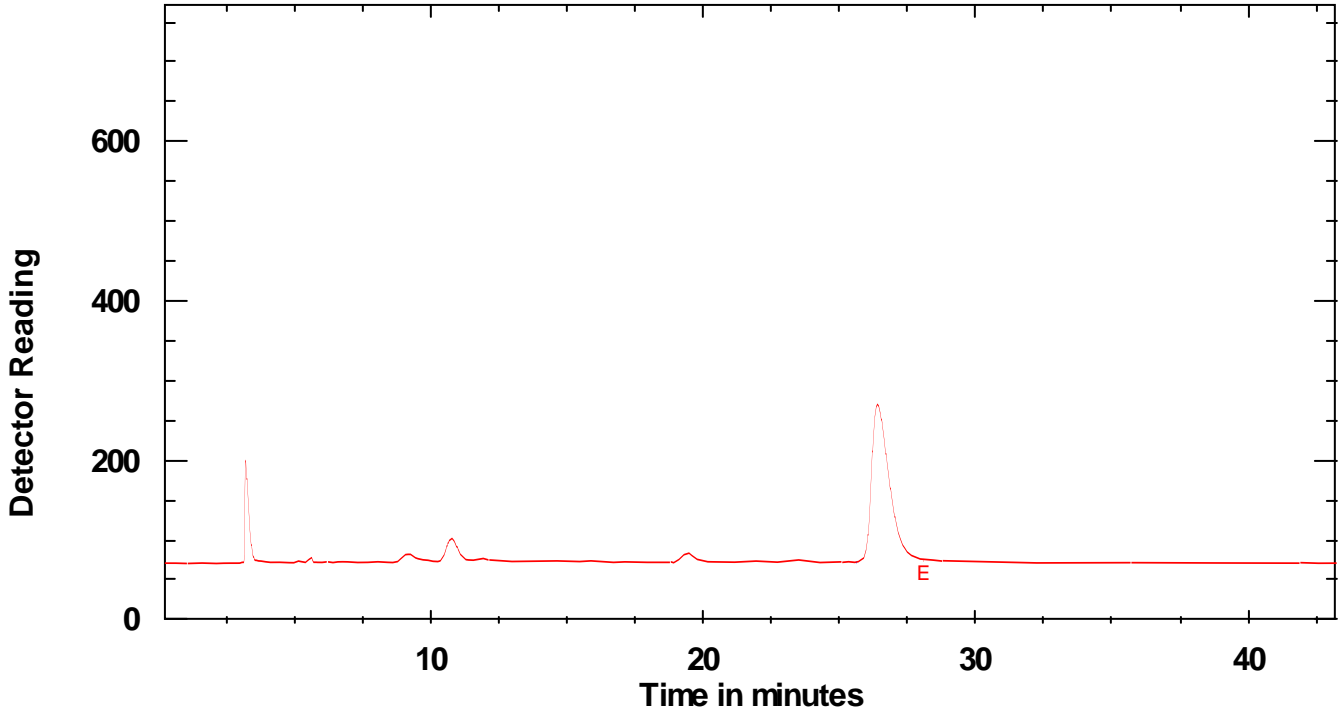

2008/11/17 09:50:39 Flow set to 1.00 at 0.00 minutes

2008/11/17 10:33:58 Run stopped by operator

**PEAK REPORT**

| # | begin | end   | area | percent | maximum | time  | begins as | name |
|---|-------|-------|------|---------|---------|-------|-----------|------|
| 1 | 25.63 | 28.09 | 8798 | 100.0   | 269.31  | 26.40 | Baseline  |      |



# Chromatogram Report

First line of organization's address  
Second line of organization's address

RYN-2-138 + RYN-2-139 co inj col IA 20% Ea/Hex

Report produced on 2008/11/17 at 下午 11:25:31 by Put your name here

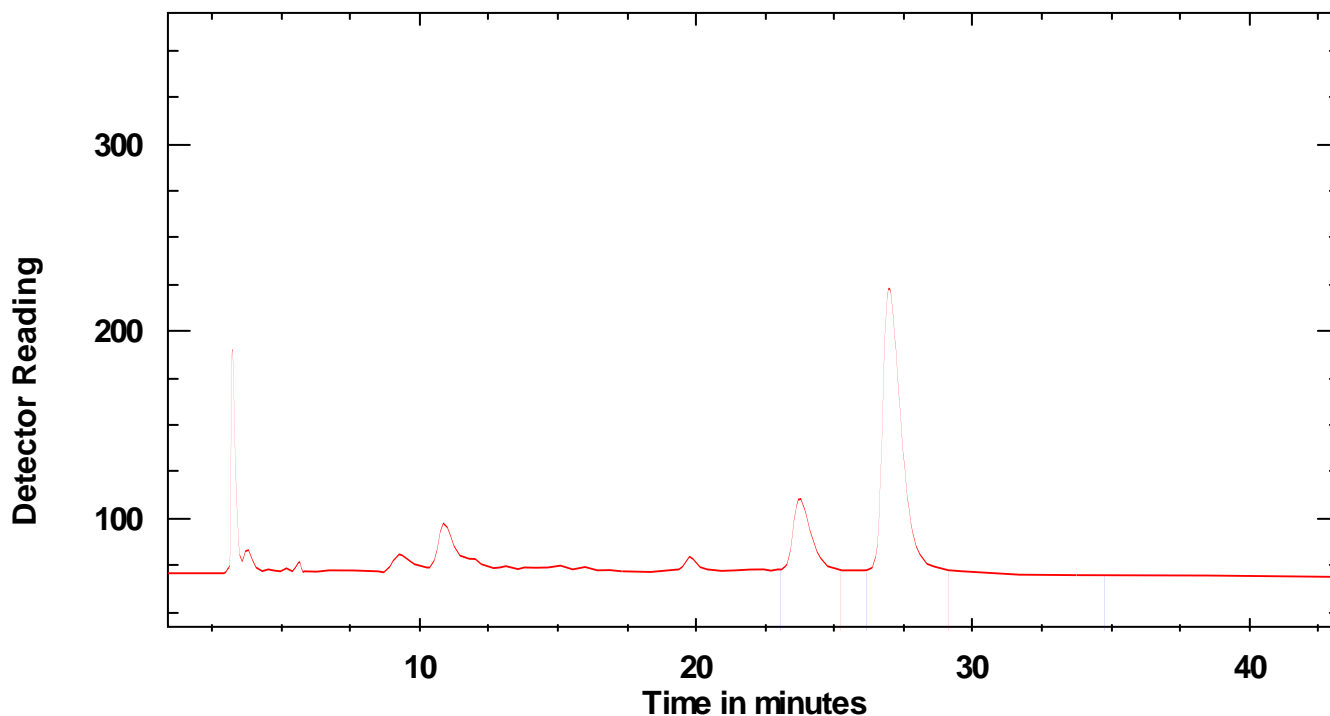

2008/11/17 10:40:01 Flow set to 1.00 at 0.00 minutes

2008/11/17 11:24:03 Run stopped by operator

## PEAK REPORT

| # | begin | end   | area | percent | maximum | time  | begins as | name |
|---|-------|-------|------|---------|---------|-------|-----------|------|
| 1 | 23.03 | 25.20 | 1699 | 19.5    | 110.35  | 23.74 | Baseline  |      |
| 2 | 26.15 | 29.12 | 7006 | 80.5    | 222.86  | 26.97 | Baseline  |      |

(For comparison)



# Chromatogram Report

First line of organization's address

Second line of organization's address

RYN-2-143 racemate col IA 10% Ea/Hex

Report produced on 2008/11/20 at 下午 02:01:44 by Put your name here

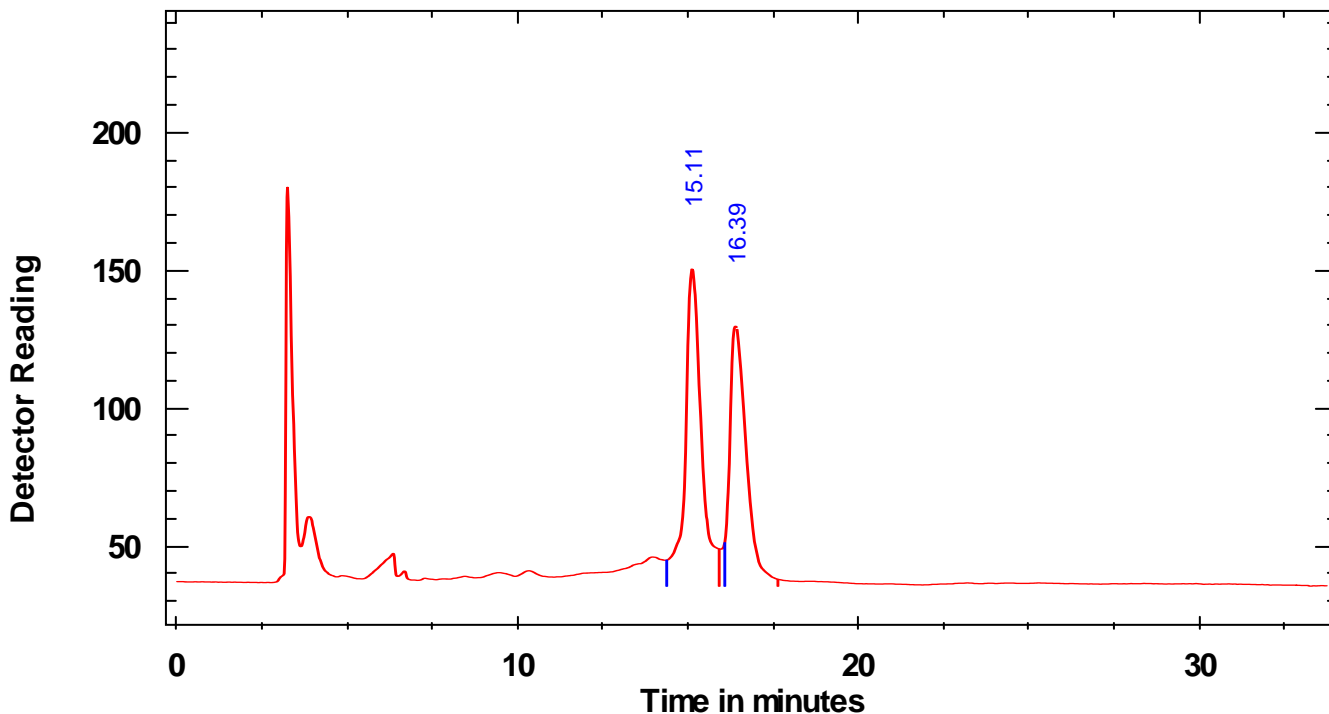

2008/11/19 02:29:54 Flow set to 1.00 at 0.00 minutes

2008/11/19 03:03:42 Run stopped by operator

### PEAK REPORT

| # | begin | end   | area | percent | maximum | time  | begins as | name |
|---|-------|-------|------|---------|---------|-------|-----------|------|
| 1 | 14.37 | 15.91 | 2761 | 53.9    | 150.47  | 15.11 | Baseline  |      |
| 2 | 16.08 | 17.64 | 2362 | 46.1    | 129.75  | 16.39 | Baseline  |      |



# Chromatogram Report

First line of organization's address  
 Second line of organization's address

RYN-2-140 chiral col IA 10% Ea/Hex

Report produced on 2008/11/20 at 下午 02:03:47 by Put your name here

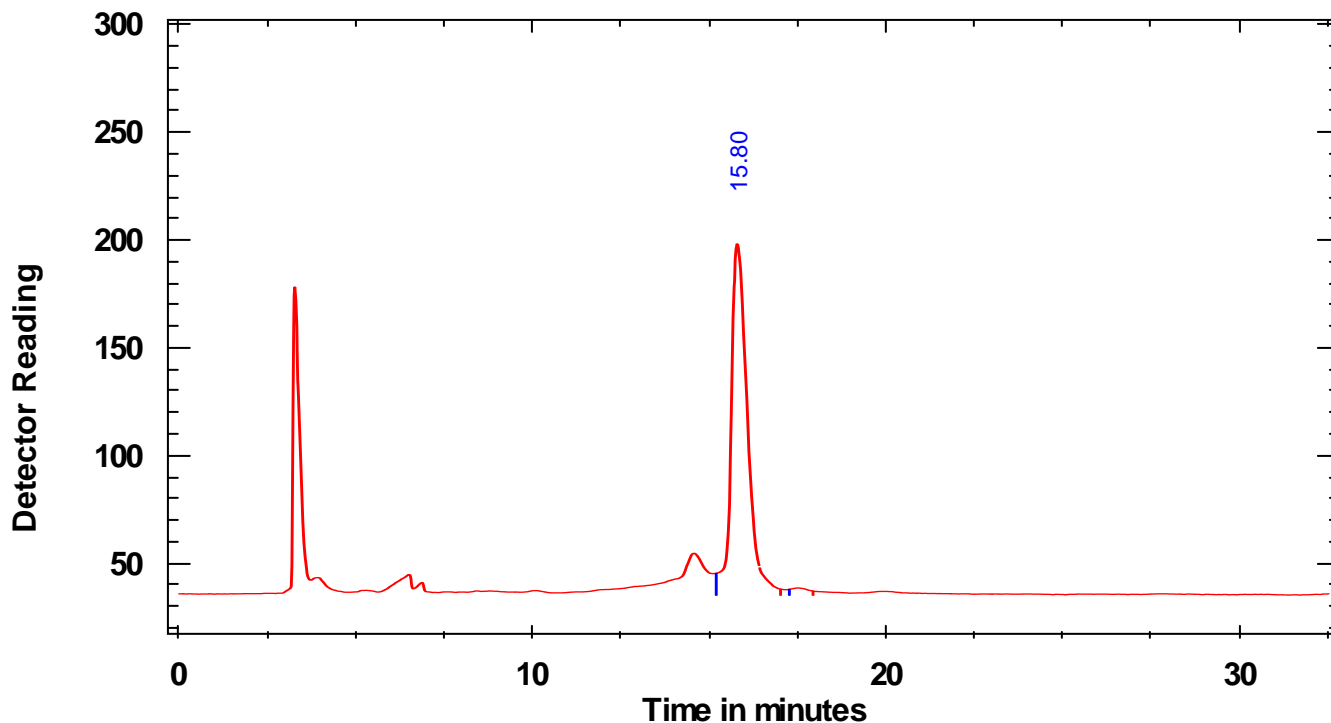

2008/11/19 03:05:33 Flow set to 1.00 at 0.03 minutes

2008/11/19 03:38:06 Run stopped by operator

## PEAK REPORT

| # | begin | end   | area | percent | maximum | time  | begins as | name |
|---|-------|-------|------|---------|---------|-------|-----------|------|
| 1 | 15.21 | 17.03 | 4515 | 99.5    | 198.15  | 15.80 | Baseline  |      |

(For comparison)

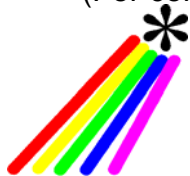

# Chromatogram Report

First line of organization's address

Second line of organization's address

RYN-2-140 + RYN-2-143 co inj col IA 10% Ea/Hex

Report produced on 2008/11/20 at 下午 02:05:01 by Put your name here

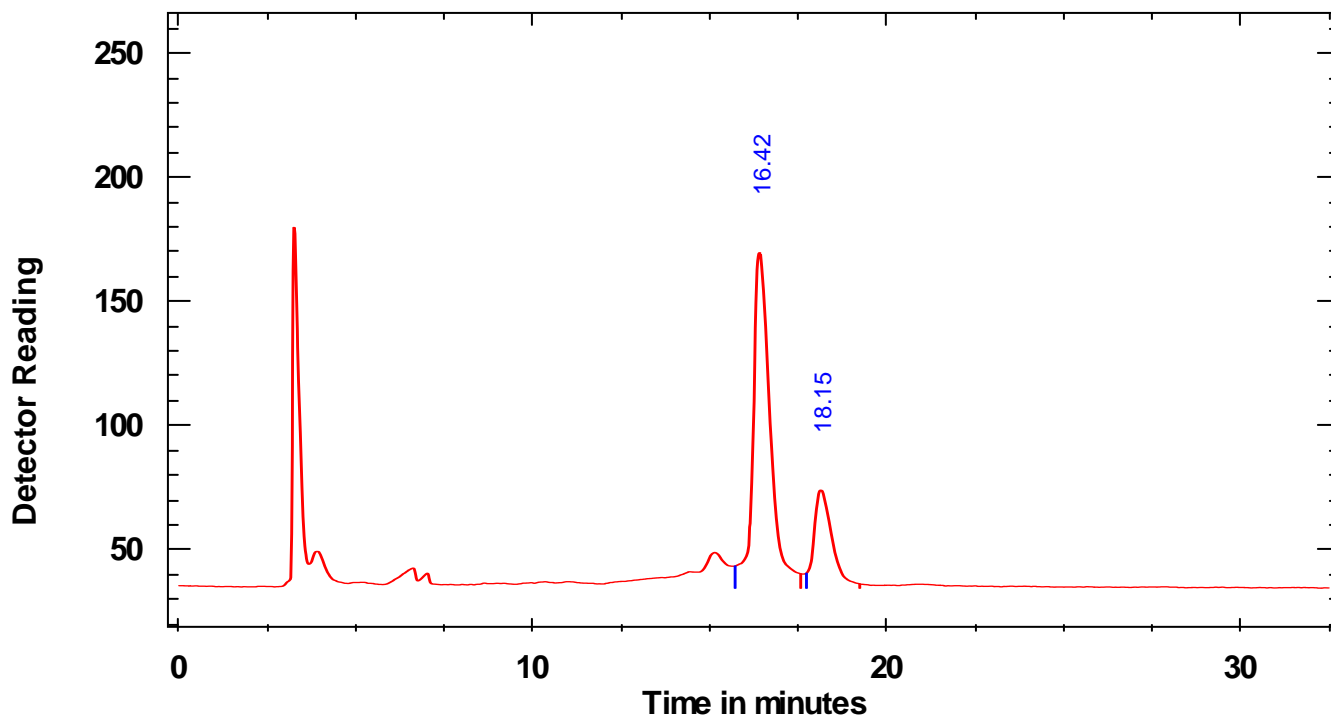

2008/11/19 03:40:05 Flow set to 1.00 at 0.00 minutes

2008/11/19 04:12:38 Run stopped by operator

## PEAK REPORT

| # | begin | end   | area | percent | maximum | time  | begins as | name |
|---|-------|-------|------|---------|---------|-------|-----------|------|
| 1 | 15.72 | 17.57 | 3768 | 77.9    | 169.61  | 16.42 | Baseline  |      |
| 2 | 17.74 | 19.24 | 1068 | 22.1    | 73.93   | 18.15 | Baseline  |      |



# Chromatogram Report

First line of organization's address  
Second line of organization's address

RYN-2-144 racemate Col IA 15% Ea/Hex

Report produced on 2008/11/24 at 下午 05:56:34 by Put your name here

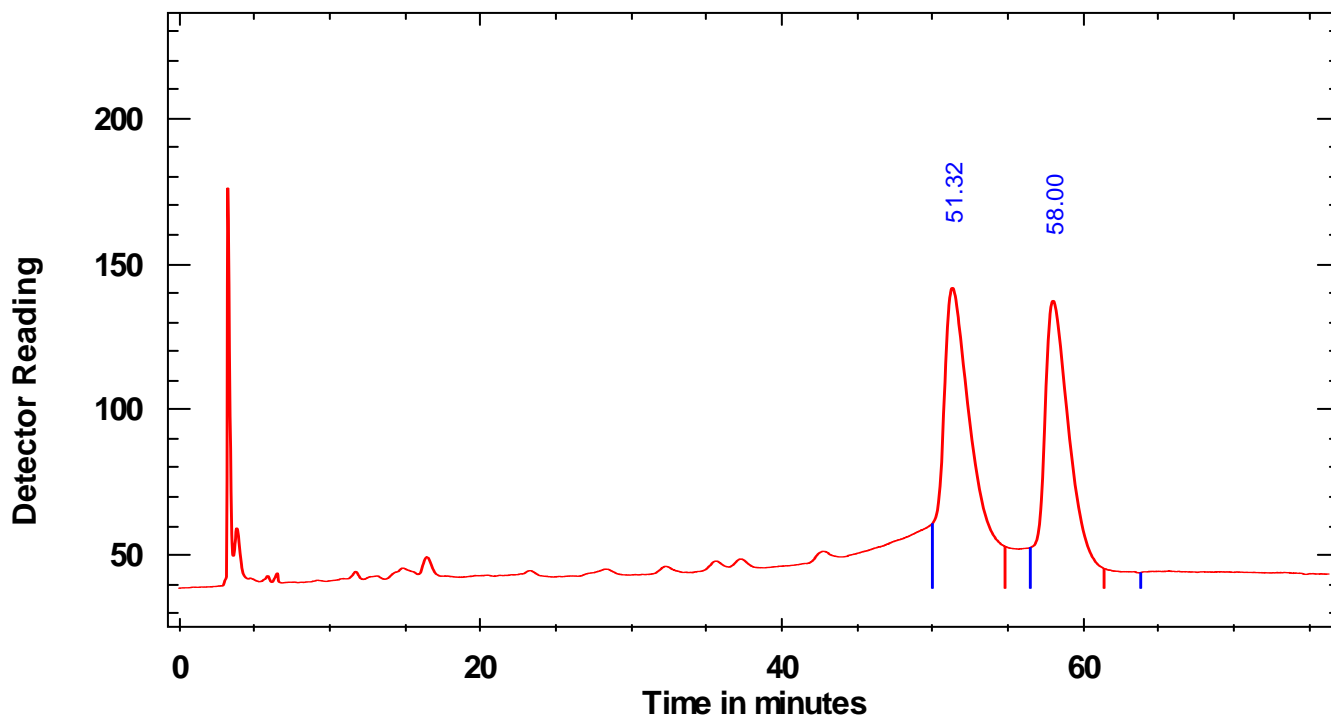

2008/11/24 11:29:28 Flow set to 1.00 at 0.01 minutes

2008/11/24 12:45:49 Run stopped by operator

## PEAK REPORT

| # | begin | end   | area | percent | maximum | time  | begins as | name |
|---|-------|-------|------|---------|---------|-------|-----------|------|
| 1 | 49.99 | 54.81 | 8855 | 49.4    | 141.88  | 51.32 | Baseline  |      |
| 2 | 56.49 | 61.39 | 9061 | 50.6    | 137.44  | 58.00 | Baseline  |      |



# Chromatogram Report

First line of organization's address  
Second line of organization's address

RYN-2-141 chiral Col IA 15% Ea/Hex

Report produced on 2008/11/24 at 下午 05:59:34 by Put your name here

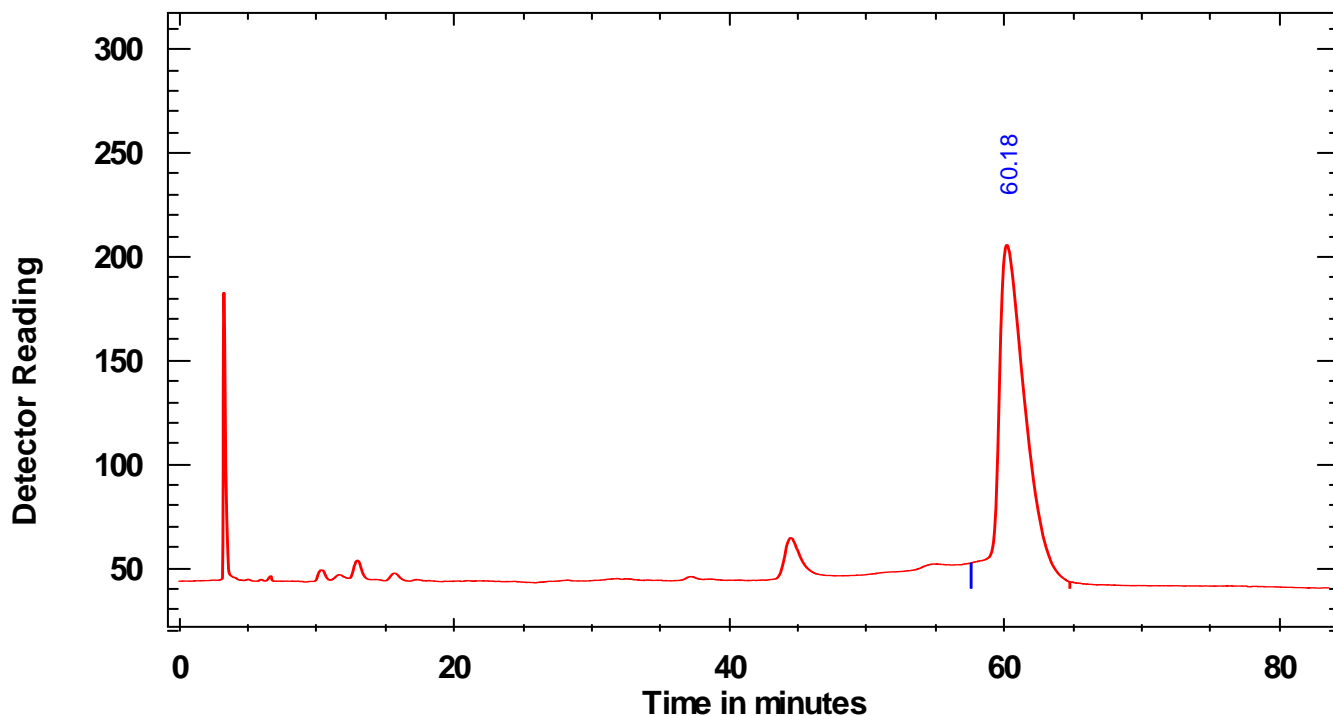

2008/11/24 12:47:01 Flow set to 1.00 at 0.00 minutes

2008/11/24 02:10:39 Run stopped by operator

## PEAK REPORT

| # | begin | end   | area  | percent | maximum | time  | begins as | name |
|---|-------|-------|-------|---------|---------|-------|-----------|------|
| 1 | 57.59 | 64.76 | 19950 | 100.0   | 205.82  | 60.18 | Baseline  |      |

(For comparison)

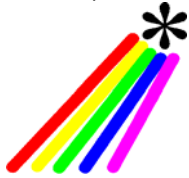

# Chromatogram Report

First line of organization's address

Second line of organization's address

RYN-2-141 RYN-2-144 co inj Col IA 15% Ea/Hex

Report produced on 2008/11/24 at 下午 06:00:40 by Put your name here

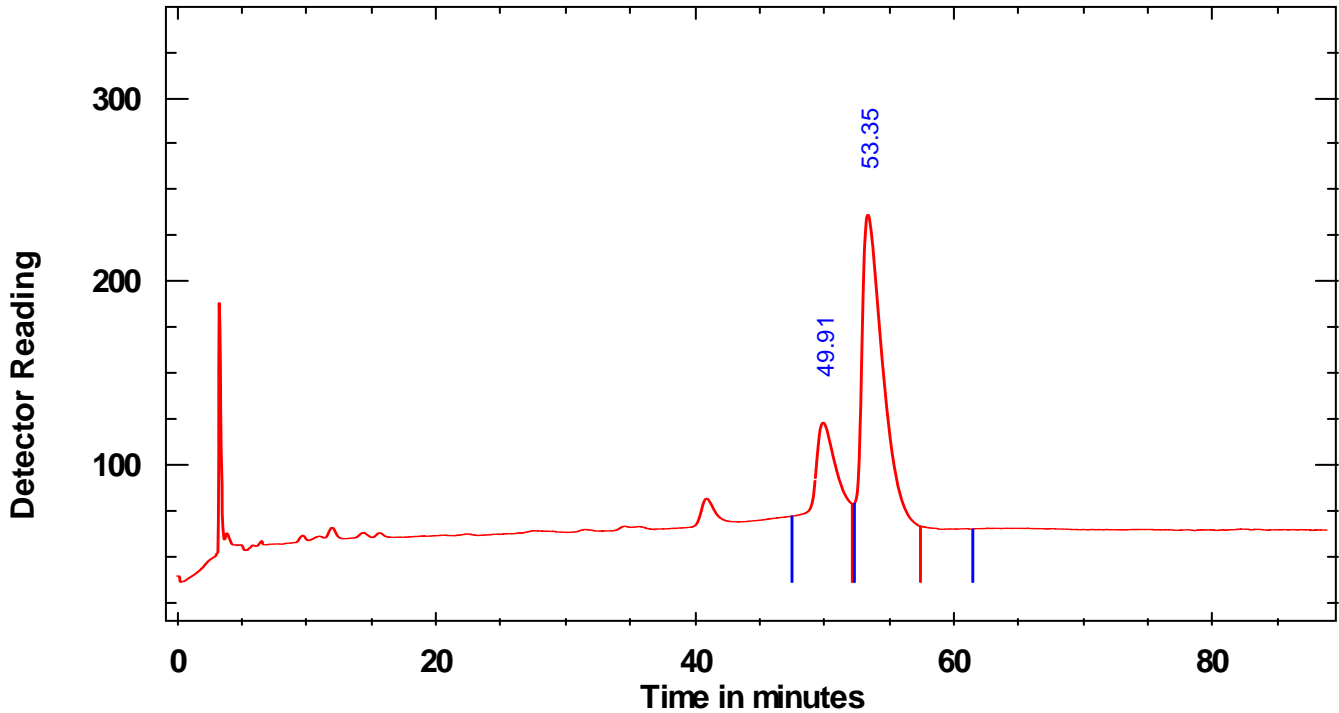

2008/11/24 02:18:50 Flow set to 1.00 at 0.03 minutes

2008/11/24 03:47:36 Run stopped by operator

## PEAK REPORT

| # | begin | end   | area  | percent | maximum | time  | begins as | name |
|---|-------|-------|-------|---------|---------|-------|-----------|------|
| 1 | 47.48 | 52.14 | 4336  | 20.4    | 123.18  | 49.91 | Baseline  |      |
| 2 | 52.30 | 57.41 | 16920 | 79.6    | 236.47  | 53.35 | Baseline  |      |





# Chromatogram Report

First line of organization's address  
Second line of organization's address

RYN-2-146 Racemate col IA 10% ea /hex

Report produced on 2008/11/28 at 下午 04:06:12 by Put your name here

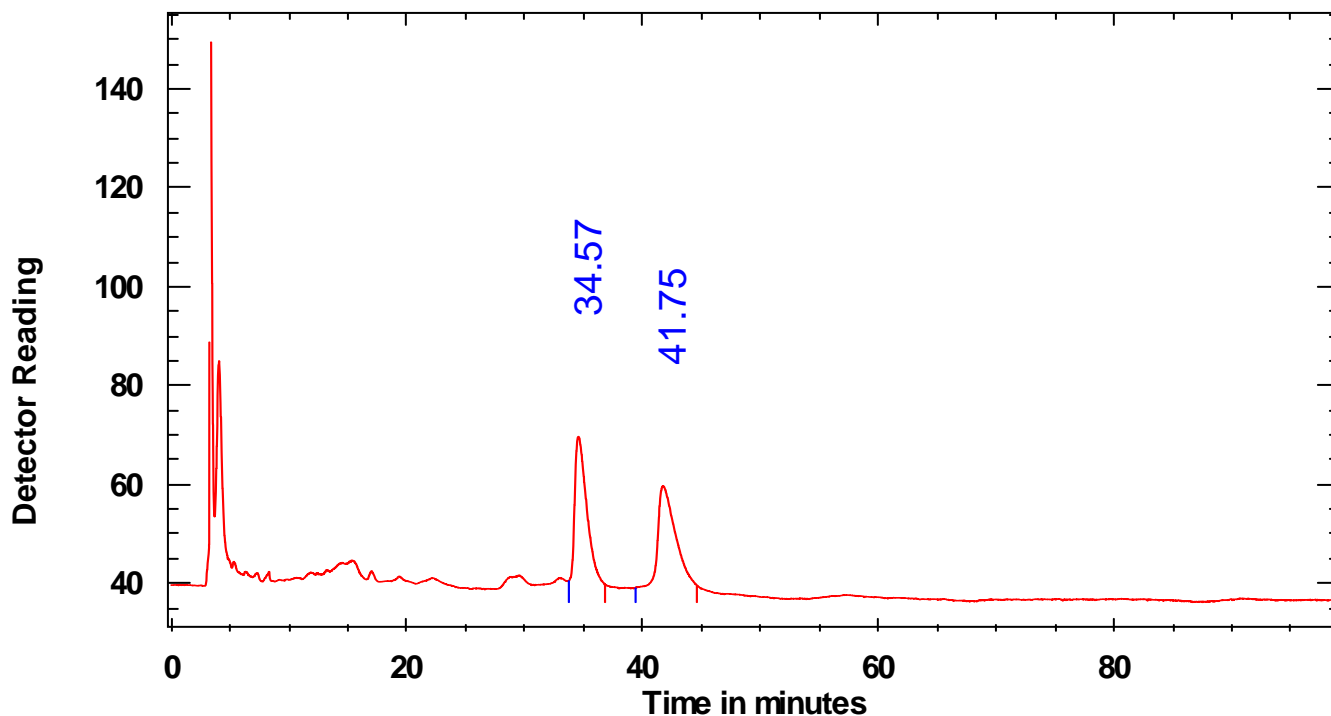

2008/11/28 12:23:44 Flow set to 1.00 at 0.00 minutes

2008/11/28 02:09:07 Run stopped by operator

## PEAK REPORT

| # | begin | end   | area | percent | maximum | time  | begins as | name |
|---|-------|-------|------|---------|---------|-------|-----------|------|
| 1 | 33.75 | 36.82 | 2042 | 49.7    | 69.63   | 34.57 | Baseline  |      |
| 2 | 39.41 | 44.61 | 2069 | 50.3    | 59.61   | 41.75 | Baseline  |      |



# Chromatogram Report

First line of organization's address  
Second line of organization's address

RYN-2-145 chiral col IA 10% ea /hex

Report produced on 2008/11/28 at 下午 04:07:24 by Put your name here

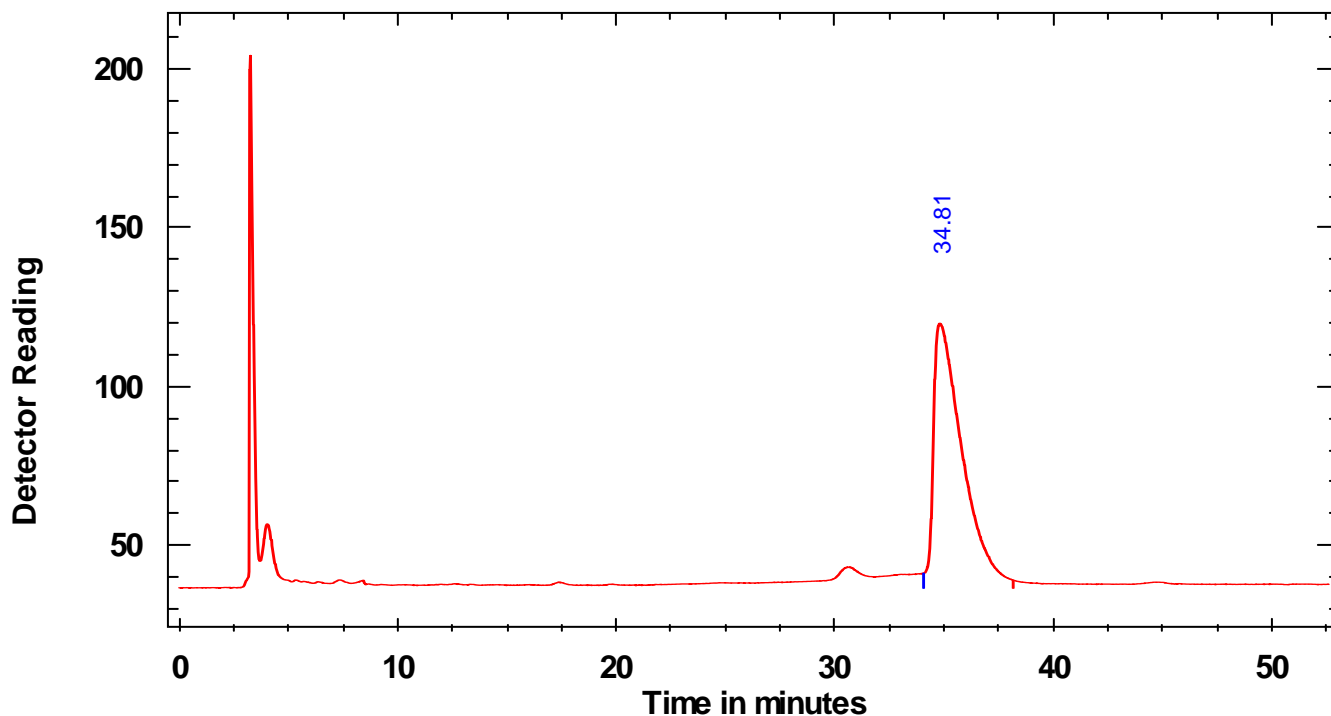

2008/11/28 02:11:15 Flow set to 1.00 at 0.01 minutes

2008/11/28 03:03:54 Run stopped by operator

## PEAK REPORT

| # | begin | end   | area | percent | maximum | time  | begins as | name |
|---|-------|-------|------|---------|---------|-------|-----------|------|
| 1 | 34.06 | 38.16 | 6861 | 100.0   | 119.79  | 34.81 | Baseline  |      |

(For comparison)

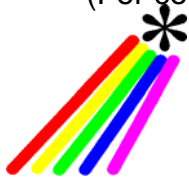

# Chromatogram Report

First line of organization's address

Second line of organization's address

RYN-2-145 + RYN-2-146 co inj 2 col IA 10% ea /hex

Report produced on 2008/11/28 at 下午 05:39:50 by Put your name here

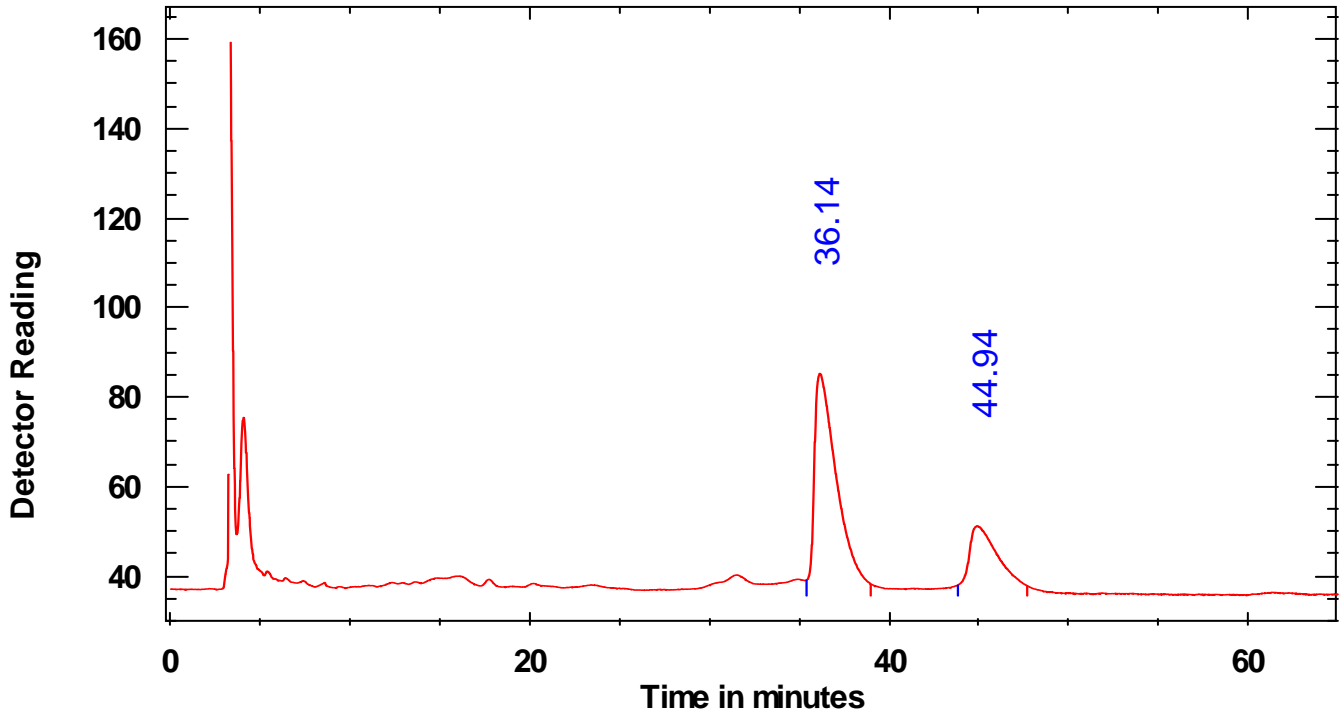

2008/11/28 04:10:25 Flow set to 1.00 at 0.00 minutes

2008/11/28 05:16:03 Run stopped by operator

## PEAK REPORT

| # | begin | end   | area | percent | maximum | time  | begins as | name |
|---|-------|-------|------|---------|---------|-------|-----------|------|
| 1 | 35.40 | 38.98 | 3792 | 73.5    | 85.15   | 36.14 | Baseline  |      |
| 2 | 43.84 | 47.69 | 1364 | 26.5    | 51.16   | 44.94 | Baseline  |      |
